# Supplementary material for: Circular RNA profiles of osteoarthritic synovium
Source: Royal Society of Chemistry journal article supplement (doi:10.1039/d2mo00066k), 2022-03-31
Supplement: d2mo00066k3.xlsx [file d2mo00066k3.xlsx]

## Sheet: DE.circRNA
The average phastCons100way score of circRNAs
CircRNAID	circBaseID	GeneName	cummulative number	Conservation(average phastCons 100way score)	approximate average phastCons 100way score	cummulative frequency
chr13:77456307-77456515-		G022607	1	0.00813397	0.01	0.008
chr3:144219473-144220261+			2	0.0116603	0.01	0.016
chr1:151387477-151387742-		POGZ	3	0.0206767	0.02	0.024
chr8:90734243-90737869-	hsa_circ_0008587	LOC101929709	4	0.0292528	0.03	0.032
chr14:101402109-101415933+	hsa_circ_0101212	GSE61474_XLOC_018852	5	0.0343074	0.03	0.04
chr6:13579683-13584457+	hsa_circ_0007218	SIRT5	6	0.0433508	0.04	0.048
chr7:30590252-30601744-	hsa_circ_0001693	LOC401320	7	0.0569738	0.06	0.056
chr3:65958988-65978071-		MAGI1	8	0.0639227	0.06	0.064
chr22:28290543-28310335-	hsa_circ_0062688	PITPNB	9	0.0651847	0.07	0.072
chr1:233353645-233363117-	hsa_circ_0003314	PCNXL2	10	0.0713713	0.07	0.08
chr6:144858718-144864006+	hsa_circ_0130908	UTRN	11	0.0714124	0.07	0.088
chr3:172003716-172028671+	hsa_circ_0002422	FNDC3B	12	0.071566	0.07	0.096
chr18:60206914-60217693+	hsa_circ_0000854	ZCCHC2	13	0.0746939	0.07	0.104
chr11:94308165-94341852+		PIWIL4	14	0.0750208	0.08	0.112
chr5:130590788-130591885+		CDC42SE2	15	0.075592	0.08	0.12
chr2:9028148-9098771-	hsa_circ_0008847	MBOAT2	16	0.0765165	0.08	0.128
chr22:22153301-22162135-	hsa_circ_0004872	MAPK1	17	0.0809621	0.08	0.136
chr3:170906491-170912424-	hsa_circ_0002387	TNIK	18	0.0841422	0.08	0.144
chr15:50935537-50955243-	hsa_circ_0004951	TRPM7	19	0.0853656	0.09	0.152
chr6:167435897-167438382+	hsa_circ_0004556	FGFR1OP	20	0.090185	0.09	0.16
chr8:101232507-101245765+	hsa_circ_0135299	SPAG1	21	0.094615	0.09	0.168
chr4:166959045-166999182+		TLL1	22	0.0950595	0.1	0.176
chr5:130797398-130883883-	hsa_circ_0127887	RAPGEF6	23	0.0965948	0.1	0.184
chr22:28269726-28310335-	hsa_circ_0004441	PITPNB	24	0.0967077	0.1	0.192
chr2:53977920-53992722-	hsa_circ_0002416	ASB3	25	0.0972235	0.1	0.2
chr12:88542065-88570096+	hsa_circ_0027689	TMTC3	26	0.099151	0.1	0.208
chr6:629835-637861-	hsa_circ_0075445	EXOC2	27	0.0992401	0.1	0.216
chr2:190656516-190670480+	hsa_circ_0004776	PMS1	28	0.102206	0.1	0.224
chr7:64539002-64552330+		RP11-460N20.4	29	0.104351	0.1	0.232
chr7:158552177-158557544-	hsa_circ_0001776	ESYT2	30	0.104601	0.1	0.24
chr18:48444480-48458730+	hsa_circ_0047700	ME2	31	0.104645	0.1	0.248
chr16:53288350-53308214+	hsa_circ_0000702	CHD9	32	0.105391	0.11	0.256
chr7:20406635-20431121+		ITGB8	33	0.105652	0.11	0.264
chr14:104245082-104263855-	hsa_circ_0005791	PPP1R13B	34	0.105667	0.11	0.272
chr14:93178237-93180796-		LGMN	35	0.106055	0.11	0.28
chr8:11152703-11157657+	hsa_circ_0135466	MTMR9	36	0.106317	0.11	0.288
chr18:19116003-19148055-	hsa_circ_0008520	ESCO1	37	0.10702	0.11	0.296
chr3:154006655-154013128-	hsa_circ_0122455	DHX36	38	0.108264	0.11	0.304
chr15:41373218-41379880-	hsa_circ_0007993	INO80	39	0.108825	0.11	0.312
chr2:10807344-10808849-		NOL10	40	0.110027	0.11	0.32
chr3:51575514-51586079+	hsa_circ_0001306	RAD54L2	41	0.110733	0.11	0.328
chr5:70331372-70333373-		NAIP	42	0.111688	0.11	0.336
chr11:120310838-120331466+	hsa_circ_0024629	ARHGEF12	43	0.113481	0.11	0.344
chr9:111812563-111826847-	hsa_circ_0003965	TMEM245	44	0.114771	0.11	0.352
chr7:121753172-121773795-	hsa_circ_0006919	AASS	45	0.114793	0.11	0.36
chr16:24979672-24981901-	hsa_circ_0004260	ARHGAP17	46	0.11574	0.12	0.368
chr9:98740343-98766983+	hsa_circ_0008720	ERCC6L2	47	0.116591	0.12	0.376
chr20:2928628-2945848+	hsa_circ_0005265	PTPRA	48	0.119883	0.12	0.384
chr18:42281140-42339068+	hsa_circ_0108447	SETBP1	49	0.120012	0.12	0.392
chr12:105536231-105558085+		KIAA1033	50	0.120256	0.12	0.4
chr4:36115792-36122948-		ARAP2	51	0.121867	0.12	0.408
chr14:23375404-23380612-	hsa_circ_0031241	RBM23	52	0.124304	0.12	0.416
chr11:70176279-70181800+	hsa_circ_0096344	PPFIA1	53	0.125245	0.13	0.424
chr1:213251038-213303232+	hsa_circ_0005841	RPS6KC1	54	0.127395	0.13	0.432
chr11:108106397-108119829+	hsa_circ_0000356	ATM	55	0.131155	0.13	0.44
chr1:22078000-22084276-	hsa_circ_0112078	USP48	56	0.131384	0.13	0.448
chr20:17928130-17937681-	hsa_circ_0001977	SNX5	57	0.131878	0.13	0.456
chr2:131116440-131119905+		PTPN18	58	0.132054	0.13	0.464
chr11:17121407-17139218-		PIK3C2A	59	0.132787	0.13	0.472
chr6:126314903-126334247+	hsa_circ_0077789	TRMT11	60	0.13482	0.13	0.48
chr7:65705312-65751696+	hsa_circ_0006041	TPST1	61	0.135285	0.14	0.488
chr19:9677012-9678851-	hsa_circ_0006476	ZNF121	62	0.1375	0.14	0.496
chr6:31239010-31324103-		HLA-C	63	0.139668	0.14	0.504
chr15:60639773-60656722-		ANXA2	64	0.14082	0.14	0.512
chr1:222897434-222898897+	hsa_circ_0003413	BROX	65	0.141188	0.14	0.52
chr11:78176922-78204241-	hsa_circ_0005935	NARS2	66	0.14201	0.14	0.528
chr10:27301811-27303640-	hsa_circ_0018007	ANKRD26	67	0.143443	0.14	0.536
chr3:196533450-196539722+	hsa_circ_0004950	PAK2	68	0.143966	0.14	0.544
chr3:130442258-130454846-	hsa_circ_0121874	PIK3R4	69	0.144054	0.14	0.552
chr10:111883775-111890244+	hsa_circ_0003357	ADD3	70	0.145209	0.15	0.56
chr10:102703783-102710510+	hsa_circ_0092408	SLF2	71	0.145363	0.15	0.568
chr2:200233328-200298237-	hsa_circ_0003915	SATB2	72	0.1456	0.15	0.576
chr15:76566753-76589689-	hsa_circ_0104575	ETFA	73	0.146065	0.15	0.584
chr16:74493580-74497377-	hsa_circ_0003315	GLG1	74	0.146472	0.15	0.592
chr11:108029647-108059928-		NPAT	75	0.147728	0.15	0.6
chr15:81271272-81274523-	hsa_circ_0000645	MESDC2	76	0.148616	0.15	0.608
chrX:117892018-117910474+	hsa_circ_0091399	IL13RA1	77	0.149244	0.15	0.616
chr11:2991033-2993473-	hsa_circ_0020822	NAP1L4	78	0.151741	0.15	0.624
chr5:130791494-130797781-	hsa_circ_0127884	RAPGEF6	79	0.151813	0.15	0.632
chr13:48989836-48996926-		LPAR6	80	0.152672	0.15	0.64
chr15:49319562-49327855-		SECISBP2L	81	0.154136	0.15	0.648
chr3:56703728-56707753-	hsa_circ_0001316	FAM208A	82	0.157253	0.16	0.656
chr10:111883775-111892158+	hsa_circ_0092631	ADD3	83	0.157979	0.16	0.664
chr5:139819704-139825560+	hsa_circ_0001540	ANKHD1	84	0.161789	0.16	0.672
chr5:76758920-76760634-	hsa_circ_0001498	WDR41	85	0.16379	0.16	0.68
chr2:60998654-61007914+	hsa_circ_0120517	PAPOLG	86	0.165414	0.17	0.688
chr10:131964771-131967754+	hsa_circ_0093110	GLRX3	87	0.16565	0.17	0.696
chr5:139818046-139825560+	hsa_circ_0007862	ANKHD1	88	0.166454	0.17	0.704
chr4:128842679-128861152-	hsa_circ_0009133	MFSD8	89	0.168762	0.17	0.712
chr1:93651902-93672955+		CCDC18	90	0.179961	0.18	0.72
chr15:44620883-44673174+	hsa_circ_0035052	CASC4	91	0.180808	0.18	0.728
chr6:42600290-42604932+	hsa_circ_0076373	UBR2	92	0.181133	0.18	0.736
chr2:61014082-61020850+	hsa_circ_0120522	PAPOLG	93	0.184444	0.18	0.744
chr5:82832826-82850857+	hsa_circ_0073239	VCAN	94	0.185049	0.19	0.752
chr7:87837822-87840240-		SRI	95	0.19012	0.19	0.76
chr11:93429486-93433352+	hsa_circ_0096775	CEP295	96	0.197698	0.2	0.768
chr7:76922269-76924255+	hsa_circ_0134678	CCDC146	97	0.215803	0.22	0.776
chr4:144449021-144451679+	hsa_circ_0125428	SMARCA5	98	0.220572	0.22	0.784
chr5:64863340-64868113+	hsa_circ_0072697	PPWD1	99	0.229493	0.23	0.792
chrX:134679348-134686071+	hsa_circ_0139798	DDX26B	100	0.232049	0.23	0.8
chr1:31465237-31468067-	hsa_circ_0000043	PUM1	101	0.23497	0.23	0.808
chr15:62221700-62223458-	hsa_circ_0004456	VPS13C	102	0.236953	0.24	0.816
chr6:100009243-100010824-	hsa_circ_0077438	CCNC	103	0.257838	0.26	0.824
chrX:139865365-139865527+		AK054921	104	0.277301	0.28	0.832
chr8:37623044-37623873+	hsa_circ_0001788	PROSC	105	0.286265	0.29	0.84
chr15:78581961-78582917-		WDR61	106	0.319227	0.32	0.848
chr13:31204972-31205611+	hsa_circ_0005874	USPL1	107	0.328125	0.33	0.856
chr3:17052397-17056403+		PLCL2	108	0.328974	0.33	0.864
chr6:107824861-107827631+	hsa_circ_0001633	SOBP	109	0.337459	0.34	0.872
chr11:18312989-18314523-	hsa_circ_0000280	HPS5	110	0.338436	0.34	0.88
chr3:178921332-178922376+	hsa_circ_0122803	PIK3CA	111	0.344019	0.34	0.888
chr14:31596991-31602881-	hsa_circ_0002301	HECTD1	112	0.344186	0.34	0.896
chr1:155836426-155838582+	hsa_circ_0110910	SYT11	113	0.36509	0.37	0.904
chr12:49333438-49334971-	hsa_circ_0003770	ARF3	114	0.38631	0.39	0.912
chr4:40121552-40123929+	hsa_circ_0126339	N4BP2	115	0.395879	0.4	0.92
chr8:17868746-17869336+	hsa_circ_0083465	PCM1	116	0.448731	0.45	0.928
chr7:115750762-115752092-		TFEC	117	0.589181	0.59	0.936
chr8:37734627-37735069-	hsa_circ_0001789	RAB11FIP1	118	0.708804	0.71	0.944
chr8:41905896-41907225-	hsa_circ_0002754	KAT6A	119	0.715865	0.72	0.952
chr11:92085262-92088570+	hsa_circ_0000348	FAT3	120	0.800665	0.8	0.96
chr6:89793472-89794362+	hsa_circ_0132617	PNRC1	121	0.877553	0.88	0.968
chr12:90049456-90049884-	hsa_circ_0007621	ATP2B1	122	0.930536	0.93	0.976
chr7:139415731-139416814-	hsa_circ_0001756	HIPK2	123	0.935886	0.94	0.984
chr15:59323003-59323901+	hsa_circ_0001982	RNF111	124	0.949166	0.95	0.992
chr14:60749402-60750255+	hsa_circ_0032108	PPM1A	125	0.974707	0.97	1
chr4:95494502-95507595+	hsa_circ_0070467	PDLIM5		/
chr3:138218952-138251412-	hsa_circ_0122112	CEP70		/
chr3:143704385-143708679+	hsa_circ_0006731	C3orf58		/
chr10:7409611-7423911-	hsa_circ_0017648	SFMBT2		/
chr7:24663285-24690331+	hsa_circ_0001685	MPP6		/
chr5:32121601-32143986-	hsa_circ_0128830	GOLPH3		/
chr15:50330965-50339661-	hsa_circ_0035197	ATP8B4		/
chr18:74728454-74766036-		MBP		/
chr15:77577300-77657567-		PEAK1		/
chr9:17388160-17466889+		CNTLN		/
chrX:154645236-154649223-	hsa_circ_0004666	GSE61474_XLOC_068665		/

## Sheet: upstream-2kb
The average phastCons100way score of the sequence within 2kb upstream of circRNAs
CircRNAID	upstream 2kb CircRNAID	circBaseID	GeneName	cummulative number	Conservation(average phastCons 100way score)	approximate average phastCons 100way score	cummulative frequency
chr1:151387477-151387742-	chr1:151385477-151387742-		POGZ	1	0.0250662	0.03	0.008
chr8:90734243-90737869-	chr8:90732243-90737869-	hsa_circ_0008587	LOC101929709	2	0.0392038	0.04	0.016
chr7:30590252-30601744-	chr7:30588252-30601744-	hsa_circ_0001693	LOC401320	3	0.0392038	0.04	0.024
chr14:101402109-101415933+	chr14:101400109-101415933+	hsa_circ_0101212	GSE61474_XLOC_018852	4	0.040436	0.04	0.032
chr6:167435897-167438382+	chr6:167433897-167438382+	hsa_circ_0004556	FGFR1OP	5	0.0537227	0.05	0.04
chr8:41905896-41907225-	chr8:41903896-41907225-	hsa_circ_0002754	KAT6A	6	0.0547543	0.05	0.048
chr3:65958988-65978071-	chr3:65956988-65978071-		MAGI1	7	0.059391	0.06	0.056
chr22:28290543-28310335-	chr22:28288543-28310335-	hsa_circ_0062688	PITPNB	8	0.0651172	0.07	0.064
chr1:233353645-233363117-	chr1:233351645-233363117-	hsa_circ_0003314	PCNXL2	9	0.0664952	0.07	0.072
chr18:60206914-60217693+	chr18:60204914-60217693+	hsa_circ_0000854	ZCCHC2	10	0.0667684	0.07	0.08
chr3:172003716-172028671+	chr3:172001716-172028671+	hsa_circ_0002422	FNDC3B	11	0.0675434	0.07	0.088
chr22:22153301-22162135-	chr22:22151301-22162135-	hsa_circ_0004872	MAPK1	12	0.072515	0.07	0.096
chr16:24979672-24981901-	chr16:24977672-24981901-	hsa_circ_0004260	ARHGAP17	13	0.0730733	0.07	0.104
chr11:94308165-94341852+	chr11:94306165-94341852+		PIWIL4	14	0.0744984	0.07	0.112
chr5:70331372-70333373-	chr5:70329372-70333373-		NAIP	15	0.0748126	0.07	0.12
chr2:9028148-9098771-	chr2:9026148-9098771-	hsa_circ_0008847	MBOAT2	16	0.0749835	0.07	0.128
chr2:10807344-10808849-	chr2:10805344-10808849-		NOL10	17	0.0793497	0.08	0.136
chr6:13579683-13584457+	chr6:13577683-13584457+	hsa_circ_0007218	SIRT5	18	0.0816236	0.08	0.144
chr6:629835-637861-	chr6:627835-637861-	hsa_circ_0075445	EXOC2	19	0.0822479	0.08	0.152
chr14:93178237-93180796-	chr14:93176237-93180796-		LGMN	20	0.0822479	0.08	0.16
chr15:50935537-50955243-	chr15:50933537-50955243-	hsa_circ_0004951	TRPM7	21	0.0825724	0.08	0.168
chr5:130590788-130591885+	chr5:130588788-130591885+		CDC42SE2	22	0.0866365	0.09	0.176
chr6:144858718-144864006+	chr6:144856718-144864006+	hsa_circ_0130908	UTRN	23	0.0884072	0.09	0.184
chr8:101232507-101245765+	chr8:101230507-101245765+	hsa_circ_0135299	SPAG1	24	0.0884396	0.09	0.192
chr11:2991033-2993473-	chr11:2989033-2993473-	hsa_circ_0020822	NAP1L4	25	0.0887188	0.09	0.2
chr2:131116440-131119905+	chr2:131114440-131119905+		PTPN18	26	0.0930296	0.09	0.208
chr3:154006655-154013128-	chr3:154004655-154013128-	hsa_circ_0122455	DHX36	27	0.0933561	0.09	0.216
chr2:190656516-190670480+	chr2:190654516-190670480+	hsa_circ_0004776	PMS1	28	0.0937488	0.09	0.224
chr7:158552177-158557544-	chr7:158550177-158557544-	hsa_circ_0001776	ESYT2	29	0.094259	0.09	0.232
chr5:130797398-130883883-	chr5:130795398-130883883-	hsa_circ_0127887	RAPGEF6	30	0.0952964	0.1	0.24
chr12:88542065-88570096+	chr12:88540065-88570096+	hsa_circ_0027689	TMTC3	31	0.0966902	0.1	0.248
chr15:81271272-81274523-	chr15:81269272-81274523-	hsa_circ_0000645	MESDC2	32	0.0969726	0.1	0.256
chr4:166959045-166999182+	chr4:166957045-166999182+		TLL1	33	0.0971593	0.1	0.264
chr10:27301811-27303640-	chr10:27299811-27303640-	hsa_circ_0018007	ANKRD26	34	0.0983029	0.1	0.272
chr22:28269726-28310335-	chr22:28267726-28310335-	hsa_circ_0004441	PITPNB	35	0.09839	0.1	0.28
chr7:64539002-64552330+	chr7:64537002-64552330+		RP11-460N20.4	36	0.0985779	0.1	0.288
chr2:53977920-53992722-	chr2:53975920-53992722-	hsa_circ_0002416	ASB3	37	0.0986848	0.1	0.296
chr14:104245082-104263855-	chr14:104243082-104263855-	hsa_circ_0005791	PPP1R13B	38	0.0987966	0.1	0.304
chr3:170906491-170912424-	chr3:170904491-170912424-	hsa_circ_0002387	TNIK	39	0.0998488	0.1	0.312
chr8:11152703-11157657+	chr8:11150703-11157657+	hsa_circ_0135466	MTMR9	40	0.101855	0.1	0.32
chr1:22078000-22084276-	chr1:22076000-22084276-	hsa_circ_0112078	USP48	41	0.102416	0.1	0.328
chrX:139865365-139865527+	chrX:139863365-139865527+		AK054921	42	0.102589	0.1	0.336
chr18:19116003-19148055-	chr18:19114003-19148055-	hsa_circ_0008520	ESCO1	43	0.103374	0.1	0.344
chr7:20406635-20431121+	chr7:20404635-20431121+		ITGB8	44	0.103662	0.1	0.352
chr11:120310838-120331466+	chr11:120308838-120331466+	hsa_circ_0024629	ARHGEF12	45	0.107084	0.11	0.36
chr5:76758920-76760634-	chr5:76756920-76760634-	hsa_circ_0001498	WDR41	46	0.107349	0.11	0.368
chr16:53288350-53308214+	chr16:53286350-53308214+	hsa_circ_0000702	CHD9	47	0.108132	0.11	0.376
chr9:111812563-111826847-	chr9:111810563-111826847-	hsa_circ_0003965	TMEM245	48	0.109506	0.11	0.384
chr11:70176279-70181800+	chr11:70174279-70181800+	hsa_circ_0096344	PPFIA1	49	0.109572	0.11	0.392
chr7:121753172-121773795-	chr7:121751172-121773795-	hsa_circ_0006919	AASS	50	0.111028	0.11	0.4
chr20:17928130-17937681-	chr20:17926130-17937681-	hsa_circ_0001977	SNX5	51	0.111349	0.11	0.408
chr1:222897434-222898897+	chr1:222895434-222898897+	hsa_circ_0003413	BROX	52	0.111749	0.11	0.416
chr4:36115792-36122948-	chr4:36113792-36122948-		ARAP2	53	0.115278	0.12	0.424
chr15:41373218-41379880-	chr15:41371218-41379880-	hsa_circ_0007993	INO80	54	0.116576	0.12	0.432
chr9:98740343-98766983+	chr9:98738343-98766983+	hsa_circ_0008720	ERCC6L2	55	0.117831	0.12	0.44
chr18:42281140-42339068+	chr18:42279140-42339068+	hsa_circ_0108447	SETBP1	56	0.118427	0.12	0.448
chr8:37623044-37623873+	chr8:37621044-37623873+	hsa_circ_0001788	PROSC	57	0.11894	0.12	0.456
chr11:108106397-108119829+	chr11:108104397-108119829+	hsa_circ_0000356	ATM	58	0.119095	0.12	0.464
chr18:48444480-48458730+	chr18:48442480-48458730+	hsa_circ_0047700	ME2	59	0.120067	0.12	0.472
chr5:130791494-130797781-	chr5:130789494-130797781-	hsa_circ_0127884	RAPGEF6	60	0.122732	0.12	0.48
chr12:105536231-105558085+	chr12:105534231-105558085+		KIAA1033	61	0.123052	0.12	0.488
chr3:51575514-51586079+	chr3:51573514-51586079+	hsa_circ_0001306	RAD54L2	62	0.124057	0.12	0.496
chr1:213251038-213303232+	chr1:213249038-213303232+	hsa_circ_0005841	RPS6KC1	63	0.124916	0.12	0.504
chr16:74493580-74497377-	chr16:74491580-74497377-	hsa_circ_0003315	GLG1	64	0.125543	0.13	0.512
chr7:87837822-87840240-	chr7:87835822-87840240-		SRI	65	0.126137	0.13	0.52
chr20:2928628-2945848+	chr20:2926628-2945848+	hsa_circ_0005265	PTPRA	66	0.127907	0.13	0.528
chr3:196533450-196539722+	chr3:196531450-196539722+	hsa_circ_0004950	PAK2	67	0.128768	0.13	0.536
chr10:102703783-102710510+	chr10:102701783-102710510+	hsa_circ_0092408	SLF2	68	0.129056	0.13	0.544
chr3:144219473-144220261+	chr3:144217473-144220261+			69	0.130441	0.13	0.552
chr6:126314903-126334247+	chr6:126312903-126334247+	hsa_circ_0077789	TRMT11	70	0.130789	0.13	0.56
chr11:17121407-17139218-	chr11:17119407-17139218-		PIK3C2A	71	0.131642	0.13	0.568
chr7:65705312-65751696+	chr7:65703312-65751696+	hsa_circ_0006041	TPST1	72	0.13196	0.13	0.576
chr7:76922269-76924255+	chr7:76920269-76924255+	hsa_circ_0134678	CCDC146	73	0.132907	0.13	0.584
chr15:60639773-60656722-	chr15:60637773-60656722-		ANXA2	74	0.133794	0.13	0.592
chr11:78176922-78204241-	chr11:78174922-78204241-	hsa_circ_0005935	NARS2	75	0.135297	0.14	0.6
chr6:31239010-31324103-	chr6:31237010-31324103-		HLA-C	76	0.138306	0.14	0.608
chr13:31204972-31205611+	chr13:31202972-31205611+	hsa_circ_0005874	USPL1	77	0.138485	0.14	0.616
chrX:117892018-117910474+	chrX:117890018-117910474+	hsa_circ_0091399	IL13RA1	78	0.140372	0.14	0.624
chr15:49319562-49327855-	chr15:49317562-49327855-		SECISBP2L	79	0.142704	0.14	0.632
chr3:130442258-130454846-	chr3:130440258-130454846-	hsa_circ_0121874	PIK3R4	80	0.142984	0.14	0.64
chr15:76566753-76589689-	chr15:76564753-76589689-	hsa_circ_0104575	ETFA	81	0.14456	0.14	0.648
chr13:48989836-48996926-	chr13:48987836-48996926-		LPAR6	82	0.14521	0.15	0.656
chr15:62221700-62223458-	chr15:62219700-62223458-	hsa_circ_0004456	VPS13C	83	0.146927	0.15	0.664
chr2:200233328-200298237-	chr2:200231328-200298237-	hsa_circ_0003915	SATB2	84	0.147682	0.15	0.672
chr3:56703728-56707753-	chr3:56701728-56707753-	hsa_circ_0001316	FAM208A	85	0.151577	0.15	0.68
chr3:178921332-178922376+	chr3:178919332-178922376+	hsa_circ_0122803	PIK3CA	86	0.15225	0.15	0.688
chr6:100009243-100010824-	chr6:100007243-100010824-	hsa_circ_0077438	CCNC	87	0.152848	0.15	0.696
chr10:111883775-111890244+	chr10:111881775-111890244+	hsa_circ_0003357	ADD3	88	0.153211	0.15	0.704
chr1:31465237-31468067-	chr1:31463237-31468067-	hsa_circ_0000043	PUM1	89	0.154357	0.15	0.712
chr2:60998654-61007914+	chr2:60996654-61007914+	hsa_circ_0120517	PAPOLG	90	0.156061	0.16	0.72
chr5:139818046-139825560+	chr5:139816046-139825560+	hsa_circ_0007862	ANKHD1	91	0.157352	0.16	0.728
chr11:93429486-93433352+	chr11:93427486-93433352+	hsa_circ_0096775	CEP295	92	0.160781	0.16	0.736
chr15:78581961-78582917-	chr15:78579961-78582917-		WDR61	93	0.160974	0.16	0.744
chr2:61014082-61020850+	chr2:61012082-61020850+	hsa_circ_0120522	PAPOLG	94	0.161022	0.16	0.752
chr10:111883775-111892158+	chr10:111881775-111892158+	hsa_circ_0092631	ADD3	95	0.162047	0.16	0.76
chr4:128842679-128861152-	chr4:128840679-128861152-	hsa_circ_0009133	MFSD8	96	0.165512	0.17	0.768
chr14:23375404-23380612-	chr14:23373404-23380612-	hsa_circ_0031241	RBM23	97	0.167194	0.17	0.776
chr6:42600290-42604932+	chr6:42598290-42604932+	hsa_circ_0076373	UBR2	98	0.170631	0.17	0.784
chr5:82832826-82850857+	chr5:82830826-82850857+	hsa_circ_0073239	VCAN	99	0.170842	0.17	0.792
chr1:93651902-93672955+	chr1:93649902-93672955+		CCDC18	100	0.170955	0.17	0.8
chr11:108029647-108059928-	chr11:108027647-108059928-		NPAT	101	0.171027	0.17	0.808
chr5:64863340-64868113+	chr5:64861340-64868113+	hsa_circ_0072697	PPWD1	102	0.174255	0.17	0.816
chr5:139819704-139825560+	chr5:139817704-139825560+	hsa_circ_0001540	ANKHD1	103	0.175054	0.17	0.824
chr4:144449021-144451679+	chr4:144447021-144451679+	hsa_circ_0125428	SMARCA5	104	0.175274	0.18	0.832
chr15:44620883-44673174+	chr15:44618883-44673174+	hsa_circ_0035052	CASC4	105	0.179445	0.18	0.84
chr19:9677012-9678851-	chr19:9675012-9678851-	hsa_circ_0006476	ZNF121	106	0.184245	0.18	0.848
chr10:131964771-131967754+	chr10:131962771-131967754+	hsa_circ_0093110	GLRX3	107	0.189185	0.19	0.856
chr11:18312989-18314523-	chr11:18310989-18314523-	hsa_circ_0000280	HPS5	108	0.198557	0.2	0.864
chr12:90049456-90049884-	chr12:90047456-90049884-	hsa_circ_0007621	ATP2B1	109	0.202964	0.2	0.872
chrX:134679348-134686071+	chrX:134677348-134686071+	hsa_circ_0139798	DDX26B	110	0.206832	0.21	0.88
chr1:155836426-155838582+	chr1:155834426-155838582+	hsa_circ_0110910	SYT11	111	0.208973	0.21	0.888
chr8:37734627-37735069-	chr8:37732627-37735069-	hsa_circ_0001789	RAB11FIP1	112	0.230618	0.23	0.896
chr8:17868746-17869336+	chr8:17866746-17869336+	hsa_circ_0083465	PCM1	113	0.245619	0.25	0.904
chr4:40121552-40123929+	chr4:40119552-40123929+	hsa_circ_0126339	N4BP2	114	0.268182	0.27	0.912
chr14:31596991-31602881-	chr14:31594991-31602881-	hsa_circ_0002301	HECTD1	115	0.279394	0.28	0.92
chr13:77456307-77456515-	chr13:77454307-77456515-		G022607	116	0.294658	0.29	0.928
chr6:89793472-89794362+	chr6:89791472-89794362+	hsa_circ_0132617	PNRC1	117	0.304462	0.3	0.936
chr7:115750762-115752092-	chr7:115748762-115752092-		TFEC	118	0.319814	0.32	0.944
chr7:139415731-139416814-	chr7:139413731-139416814-	hsa_circ_0001756	HIPK2	119	0.332036	0.33	0.952
chr15:59323003-59323901+	chr15:59321003-59323901+	hsa_circ_0001982	RNF111	120	0.348672	0.35	0.96
chr14:60749402-60750255+	chr14:60747402-60750255+	hsa_circ_0032108	PPM1A	121	0.349439	0.35	0.968
chr12:49333438-49334971-	chr12:49331438-49334971-	hsa_circ_0003770	ARF3	122	0.367091	0.37	0.976
chr6:107824861-107827631+	chr6:107822861-107827631+	hsa_circ_0001633	SOBP	123	0.38407	0.38	0.984
chr3:17052397-17056403+	chr3:17050397-17056403+		PLCL2	124	0.412086	0.41	0.992
chr11:92085262-92088570+	chr11:92083262-92088570+	hsa_circ_0000348	FAT3	125	0.513034	0.51	1
chr4:95494502-95507595+	chr4:95492502-95507595+	hsa_circ_0070467	PDLIM5
chr3:138218952-138251412-	chr3:138216952-138251412-	hsa_circ_0122112	CEP70
chr3:143704385-143708679+	chr3:143702385-143708679+	hsa_circ_0006731	C3orf58
chr10:7409611-7423911-	chr10:7407611-7423911-	hsa_circ_0017648	SFMBT2
chr7:24663285-24690331+	chr7:24661285-24690331+	hsa_circ_0001685	MPP6
chr5:32121601-32143986-	chr5:32119601-32143986-	hsa_circ_0128830	GOLPH3
chr15:50330965-50339661-	chr15:50328965-50339661-	hsa_circ_0035197	ATP8B4
chr18:74728454-74766036-	chr18:74726454-74766036-		MBP
chr15:77577300-77657567-	chr15:77575300-77657567-		PEAK1
chr9:17388160-17466889+	chr9:17386160-17466889+		CNTLN
chrX:154645236-154649223-	chrX:154643236-154649223-	hsa_circ_0004666	GSE61474_XLOC_068665

## Sheet: downstream-2kb
	The average phastCons100way score of the sequence within 2kb downstream of circRNAs
CircRNAID	downstream 2kb CircRNAID	circBaseID	GeneName	cummulative number	Conservation(average phastCons 100way score)	approximate average phastCons 100way score	cummulative frequency
chr8:90734243-90737869-	chr8:90734243-90739869-	hsa_circ_0008587	LOC101929709	1	0.0304781	0.03	0.00833333
chr14:101402109-101415933+	chr14:101402109-101417933+	hsa_circ_0101212	GSE61474_XLOC_018852	2	0.0315071	0.03	0.0166667
chr6:13579683-13584457+	chr6:13579683-13586457+	hsa_circ_0007218	SIRT5	3	0.040428	0.04	0.025
chr5:130590788-130591885+	chr5:130590788-130593885+		CDC42SE2	4	0.0459329	0.05	0.0333333
chr1:151387477-151387742-	chr1:151387477-151389742-		POGZ	5	0.0488085	0.05	0.0416667
chr7:30590252-30601744-	chr7:30590252-30603744-	hsa_circ_0001693	LOC401320	6	0.0521974	0.05	0.05
chr6:144858718-144864006+	chr6:144858718-144866006+	hsa_circ_0130908	UTRN	7	0.0552065	0.06	0.0583333
chr3:65958988-65978071-	chr3:65958988-65980071-		MAGI1	8	0.0603111	0.06	0.0666667
chr22:28290543-28310335-	chr22:28290543-28312335-	hsa_circ_0062688	PITPNB	9	0.0626394	0.06	0.075
chr1:233353645-233363117-	chr1:233353645-233365117-	hsa_circ_0003314	PCNXL2	10	0.0654319	0.07	0.0833333
chr18:60206914-60217693+	chr18:60206914-60219693+	hsa_circ_0000854	ZCCHC2	11	0.0658451	0.07	0.0916667
chr6:167435897-167438382+	chr6:167435897-167440382+	hsa_circ_0004556	FGFR1OP	12	0.066741	0.07	0.1
chr16:24979672-24981901-	chr16:24979672-24983901-	hsa_circ_0004260	ARHGAP17	13	0.069409	0.07	0.108333
chr3:172003716-172028671+	chr3:172003716-172030671+	hsa_circ_0002422	FNDC3B	14	0.0706151	0.07	0.116667
chr11:94308165-94341852+	chr11:94308165-94343852+		PIWIL4	15	0.0735569	0.07	0.125
chr2:9028148-9098771-	chr2:9028148-9100771-	hsa_circ_0008847	MBOAT2	16	0.0753167	0.08	0.133333
chr22:22153301-22162135-	chr22:22153301-22164135-	hsa_circ_0004872	MAPK1	17	0.0777757	0.08	0.141667
chr7:158552177-158557544-	chr7:158552177-158559544-	hsa_circ_0001776	ESYT2	18	0.0780673	0.08	0.15
chr19:9677012-9678851-	chr19:9677012-9680851-	hsa_circ_0006476	ZNF121	19	0.0784375	0.08	0.158333
chr14:93178237-93180796-	chr14:93178237-93182796-		LGMN	20	0.0813596	0.08	0.166667
chr15:50935537-50955243-	chr15:50935537-50957243-	hsa_circ_0004951	TRPM7	21	0.0831851	0.08	0.175
chr6:629835-637861-	chr6:629835-639861-	hsa_circ_0075445	EXOC2	22	0.0836442	0.08	0.183333
chr8:101232507-101245765+	chr8:101232507-101247765+	hsa_circ_0135299	SPAG1	23	0.0849662	0.08	0.191667
chr11:2991033-2993473-	chr11:2991033-2995473-	hsa_circ_0020822	NAP1L4	24	0.0874803	0.09	0.2
chr2:53977920-53992722-	chr2:53977920-53994722-	hsa_circ_0002416	ASB3	25	0.0896983	0.09	0.208333
chr5:70331372-70333373-	chr5:70331372-70335373-		NAIP	26	0.0903798	0.09	0.216667
chr4:166959045-166999182+	chr4:166959045-167001182+		TLL1	27	0.0922991	0.09	0.225
chr22:28269726-28310335-	chr22:28269726-28312335-	hsa_circ_0004441	PITPNB	28	0.0939263	0.09	0.233333
chr3:170906491-170912424-	chr3:170906491-170914424-	hsa_circ_0002387	TNIK	29	0.0955382	0.1	0.241667
chr15:41373218-41379880-	chr15:41373218-41381880-	hsa_circ_0007993	INO80	30	0.0956712	0.1	0.25
chr12:88542065-88570096+	chr12:88542065-88572096+	hsa_circ_0027689	TMTC3	31	0.0958011	0.1	0.258333
chr3:154006655-154013128-	chr3:154006655-154015128-	hsa_circ_0122455	DHX36	32	0.0964952	0.1	0.266667
chr5:130797398-130883883-	chr5:130797398-130885883-	hsa_circ_0127887	RAPGEF6	33	0.0977827	0.1	0.275
chr15:81271272-81274523-	chr15:81271272-81276523-	hsa_circ_0000645	MESDC2	34	0.0978484	0.1	0.283333
chr16:53288350-53308214+	chr16:53288350-53310214+	hsa_circ_0000702	CHD9	35	0.100823	0.1	0.291667
chr11:70176279-70181800+	chr11:70176279-70183800+	hsa_circ_0096344	PPFIA1	36	0.10101	0.1	0.3
chr7:20406635-20431121+	chr7:20406635-20433121+		ITGB8	37	0.101299	0.1	0.308333
chr7:64539002-64554330+	chr7:64539002-64556330+		RP11-460N20.4	38	0.101841	0.1	0.316667
chr18:19116003-19148055-	chr18:19116003-19150055-	hsa_circ_0008520	ESCO1	39	0.103641	0.1	0.325
chr16:74493580-74497377-	chr16:74493580-74499377-	hsa_circ_0003315	GLG1	40	0.105536	0.11	0.333333
chr18:48444480-48458730+	chr18:48444480-48460730+	hsa_circ_0047700	ME2	41	0.105538	0.11	0.341667
chr14:104245082-104263855-	chr14:104245082-104265855-	hsa_circ_0005791	PPP1R13B	42	0.108125	0.11	0.35
chr2:190656516-190670480+	chr2:190656516-190672480+	hsa_circ_0004776	PMS1	43	0.1087	0.11	0.358333
chr7:121753172-121773795-	chr7:121753172-121775795-	hsa_circ_0006919	AASS	44	0.108884	0.11	0.366667
chr8:11152703-11157657+	chr8:11152703-11159657+	hsa_circ_0135466	MTMR9	45	0.10972	0.11	0.375
chr9:111812563-111826847-	chr9:111812563-111828847-	hsa_circ_0003965	TMEM245	46	0.110243	0.11	0.383333
chr9:98740343-98766983+	chr9:98740343-98768983+	hsa_circ_0008720	ERCC6L2	47	0.111103	0.11	0.391667
chr4:36115792-36122948-	chr4:36115792-36124948-		ARAP2	48	0.111117	0.11	0.4
chr11:120310838-120331466+	chr11:120310838-120333466+	hsa_circ_0024629	ARHGEF12	49	0.111459	0.11	0.408333
chr1:22078000-22084276-	chr1:22078000-22086276-	hsa_circ_0112078	USP48	50	0.111949	0.11	0.416667
chr1:222897434-222898897+	chr1:222897434-222900897+	hsa_circ_0003413	BROX	51	0.113395	0.11	0.425
chr20:2928628-2945848+	chr20:2928628-2947848+	hsa_circ_0005265	PTPRA	52	0.114338	0.11	0.433333
chr20:17928130-17937681-	chr20:17928130-17939681-	hsa_circ_0001977	SNX5	53	0.115833	0.12	0.441667
chr3:56703728-56707753-	chr3:56703728-56709753-	hsa_circ_0001316	FAM208A	54	0.116927	0.12	0.45
chr12:105536231-105558085+	chr12:105536231-105560085+		KIAA1033	55	0.117543	0.12	0.458333
chr14:23375404-23380612-	chr14:23375404-23382612-	hsa_circ_0031241	RBM23	56	0.120405	0.12	0.466667
chr18:42281140-42339068+	chr18:42281140-42341068+	hsa_circ_0108447	SETBP1	57	0.120753	0.12	0.475
chr3:144219473-144220261+	chr3:144219473-144222261+			58	0.121262	0.12	0.483333
chr10:131964771-131967754+	chr10:131964771-131969754+	hsa_circ_0093110	GLRX3	59	0.12189	0.12	0.491667
chr1:213251038-213303232+	chr1:213251038-213305232+	hsa_circ_0005841	RPS6KC1	60	0.124268	0.12	0.5
chr7:87837822-87840240-	chr7:87837822-87842240-		SRI	61	0.124666	0.12	0.508333
chr3:51575514-51586079+	chr3:51575514-51588079+	hsa_circ_0001306	RAD54L2	62	0.126468	0.13	0.516667
chr6:126314903-126334247+	chr6:126314903-126336247+	hsa_circ_0077789	TRMT11	63	0.129314	0.13	0.525
chr10:102703783-102710510+	chr10:102703783-102712510+	hsa_circ_0092408	SLF2	64	0.131267	0.13	0.533333
chr3:130442258-130454846-	chr3:130442258-130456846-	hsa_circ_0121874	PIK3R4	65	0.131476	0.13	0.541667
chr5:130791494-130797781-	chr5:130791494-130799781-	hsa_circ_0127884	RAPGEF6	66	0.133084	0.13	0.55
chr3:196533450-196539722+	chr3:196533450-196541722+	hsa_circ_0004950	PAK2	67	0.133301	0.13	0.558333
chr6:42600290-42604932+	chr6:42600290-42606932+	hsa_circ_0076373	UBR2	68	0.134563	0.13	0.566667
chr8:17868746-17869336+	chr8:17868746-17871336+	hsa_circ_0083465	PCM1	69	0.134658	0.13	0.575
chr6:31239010-31324103-	chr6:31239010-31326103-		HLA-C	70	0.138409	0.14	0.583333
chr15:62221700-62223458-	chr15:62221700-62225458-	hsa_circ_0004456	VPS13C	71	0.138787	0.14	0.591667
chr11:108106397-108119829+	chr11:108106397-108121829+	hsa_circ_0000356	ATM	72	0.139001	0.14	0.6
chr11:17121407-17139218-	chr11:17121407-17141218-		PIK3C2A	73	0.139537	0.14	0.608333
chr15:49319562-49327855-	chr15:49319562-49329855-		SECISBP2L	74	0.14217	0.14	0.616667
chrX:117892018-117910474+	chrX:117892018-117912474+	hsa_circ_0091399	IL13RA1	75	0.144268	0.14	0.625
chr4:144449021-144451679+	chr4:144449021-144453679+	hsa_circ_0125428	SMARCA5	76	0.145568	0.15	0.633333
chr11:93429486-93433352+	chr11:93429486-93435352+	hsa_circ_0096775	CEP295	77	0.146088	0.15	0.641667
chr15:76566753-76589689-	chr15:76566753-76591689-	hsa_circ_0104575	ETFA	78	0.146774	0.15	0.65
chr11:78176922-78204241-	chr11:78176922-78206241-	hsa_circ_0005935	NARS2	79	0.147166	0.15	0.658333
chr15:78581961-78582917-	chr15:78581961-78584917-		WDR61	80	0.14765	0.15	0.666667
chr13:31204972-31205611+	chr13:31204972-31207611+	hsa_circ_0005874	USPL1	81	0.148409	0.15	0.675
chr2:200233328-200298237-	chr2:200233328-200300237-	hsa_circ_0003915	SATB2	82	0.149632	0.15	0.683333
chr8:37623044-37623873+	chr8:37623044-37625873+	hsa_circ_0001788	PROSC	83	0.150424	0.15	0.691667
chr13:48989836-48996926-	chr13:48989836-48998926-		LPAR6	84	0.152898	0.15	0.7
chr8:37734627-37735069-	chr8:37734627-37737069-	hsa_circ_0001789	RAB11FIP1	85	0.15612	0.16	0.708333
chr10:27301811-27303640-	chr10:27301811-27305640-	hsa_circ_0018007	ANKRD26	86	0.15765	0.16	0.716667
chr4:128842679-128861152-	chr4:128842679-128863152-	hsa_circ_0009133	MFSD8	87	0.157717	0.16	0.725
chr10:111883775-111890244+	chr10:111883775-111892244+	hsa_circ_0003357	ADD3	88	0.15928	0.16	0.733333
chr5:139819704-139825560+	chr5:139819704-139827560+	hsa_circ_0001540	ANKHD1	89	0.163485	0.16	0.741667
chr5:139818046-139825560+	chr5:139818046-139827560+	hsa_circ_0007862	ANKHD1	90	0.166873	0.17	0.75
chrX:139865365-139865527+	chrX:139865365-139867527+		AK054921	91	0.167268	0.17	0.758333
chr5:82832826-82850857+	chr5:82832826-82852857+	hsa_circ_0073239	VCAN	92	0.169379	0.17	0.766667
chr1:93651902-93672955+	chr1:93651902-93674955+		CCDC18	93	0.169506	0.17	0.775
chr11:18312989-18314523-	chr11:18312989-18316523-	hsa_circ_0000280	HPS5	94	0.170212	0.17	0.783333
chr2:60998654-61007914+	chr2:60998654-61009914+	hsa_circ_0120517	PAPOLG	95	0.174221	0.17	0.791667
chr5:76758920-76760634-	chr5:76758920-76762634-	hsa_circ_0001498	WDR41	96	0.174886	0.17	0.8
chr6:100009243-100010824-	chr6:100009243-100012824-	hsa_circ_0077438	CCNC	97	0.175237	0.18	0.808333
chr5:64863340-64868113+	chr5:64863340-64870113+	hsa_circ_0072697	PPWD1	98	0.175864	0.18	0.816667
chr15:44620883-44673174+	chr15:44620883-44675174+	hsa_circ_0035052	CASC4	99	0.177433	0.18	0.825
chr3:178921332-178922376+	chr3:178921332-178924376+	hsa_circ_0122803	PIK3CA	100	0.185386	0.19	0.833333
chr7:76922269-76924255+	chr7:76922269-76926255+	hsa_circ_0134678	CCDC146	101	0.189115	0.19	0.841667
chr1:31465237-31468067-	chr1:31465237-31470067-	hsa_circ_0000043	PUM1	102	0.190851	0.19	0.85
chr2:61014082-61020850+	chr2:61014082-61022850+	hsa_circ_0120522	PAPOLG	103	0.197263	0.2	0.858333
chr1:155836426-155838582+	chr1:155836426-155840582+	hsa_circ_0110910	SYT11	104	0.204474	0.2	0.866667
chrX:134679348-134686071+	chrX:134679348-134688071+	hsa_circ_0139798	DDX26B	105	0.205685	0.21	0.875
chr12:49333438-49334971-	chr12:49333438-49336971-	hsa_circ_0003770	ARF3	106	0.211007	0.21	0.883333
chr3:17052397-17056403+	chr3:17052397-17058403+		PLCL2	107	0.232512	0.23	0.891667
chr10:111883775-111892158+	chr10:111883775-111894158+	hsa_circ_0092631	ADD3	108	0.234284	0.23	0.9
chr12:90049456-90049884-	chr12:90049456-90051884-	hsa_circ_0007621	ATP2B1	109	0.234335	0.23	0.908333
chr6:107824861-107827631+	chr6:107824861-107829631+	hsa_circ_0001633	SOBP	110	0.246363	0.25	0.916667
chr7:115750762-115752092-	chr7:115750762-115754092-		TFEC	111	0.273341	0.27	0.925
chr4:40121552-40123929+	chr4:40121552-40125929+	hsa_circ_0126339	N4BP2	112	0.283942	0.28	0.933333
chr15:59323003-59323901+	chr15:59323003-59325901+	hsa_circ_0001982	RNF111	113	0.323146	0.32	0.941667
chr14:31596991-31602881-	chr14:31596991-31604881-	hsa_circ_0002301	HECTD1	114	0.329122	0.33	0.95
chr7:139415731-139416814-	chr7:139415731-139418814-	hsa_circ_0001756	HIPK2	115	0.349741	0.35	0.958333
chr13:77456307-77456515-	chr13:77456307-77458515-		G022607	116	0.356089	0.36	0.966667
chr6:89793472-89794362+	chr6:89793472-89796362+	hsa_circ_0132617	PNRC1	117	0.361432	0.36	0.975
chr14:60749402-60750255+	chr14:60749402-60752255+	hsa_circ_0032108	PPM1A	118	0.370252	0.37	0.983333
chr8:41905896-41907225-	chr8:41905896-41909225-	hsa_circ_0002754	KAT6A	119	0.375586	0.38	0.991667
chr11:92085262-92088570+	chr11:92085262-92090570+	hsa_circ_0000348	FAT3	120	0.516067	0.52	1
chr7:65705312-65751696+	chr7:65705312-65753696+	hsa_circ_0006041	TPST1
chr4:95494502-95507595+	chr4:95494502-95509595+	hsa_circ_0070467	PDLIM5
chr3:138218952-138251412-	chr3:138218952-138253412-	hsa_circ_0122112	CEP70
chr3:143704385-143708679+	chr3:143704385-143710679+	hsa_circ_0006731	C3orf58
chr10:7409611-7423911-	chr10:7409611-7425911-	hsa_circ_0017648	SFMBT2
chr7:24663285-24690331+	chr7:24663285-24692331+	hsa_circ_0001685	MPP6
chr5:32121601-32143986-	chr5:32121601-32145986-	hsa_circ_0128830	GOLPH3
chr2:131116440-131119905+	chr2:131116440-131121905+		PTPN18
chr15:50330965-50339661-	chr15:50330965-50341661-	hsa_circ_0035197	ATP8B4
chr18:74728454-74766036-	chr18:74728454-74768036-		MBP
chr15:60639773-60656722-	chr15:60639773-60658722-		ANXA2
chr2:10807344-10808849-	chr2:10807344-10810849-		NOL10
chr15:77577300-77657567-	chr15:77577300-77659567-		PEAK1
chr9:17388160-17466889+	chr9:17388160-17468889+		CNTLN
chrX:154645236-154649223-	chrX:154645236-154651223-	hsa_circ_0004666	GSE61474_XLOC_068665
chr11:108029647-108059928-	chr11:108029647-108061928-		NPAT

## Sheet: total
The average phastCons100way score of circRNAs and the sequence within 2kb upstream and downstream
Conservation(average phastCons 100way score)	circRNA-cummulative frequency	upstream_2kb-cummulative frequency	downstream_2kb-cummulative frequency
0.01	0.016	0	0
0.02	0.024	0	0
0.03	0.04	0.008	0.0166667
0.04	0.048	0.032	0.025
0.05	0.048	0.048	0.05
0.06	0.064	0.056	0.075
0.07	0.104	0.128	0.125
0.08	0.144	0.168	0.191667
0.09	0.168	0.232	0.233333
0.1	0.248	0.352	0.325
0.11	0.36	0.416	0.433333
0.12	0.416	0.504	0.508333
0.13	0.48	0.592	0.575
0.14	0.552	0.648	0.625
0.15	0.648	0.712	0.7
0.16	0.68	0.76	0.741667
0.17	0.712	0.824	0.8
0.18	0.744	0.848	0.825
0.19	0.76	0.856	0.85
0.2	0.768	0.872	0.866667
0.21	0.768	0.888	0.883333
0.22	0.784	0.888	0.883333
0.23	0.808	0.896	0.908333
0.24	0.816	0.896	0.908333
0.25	0.816	0.904	0.916667
0.26	0.824	0.904	0.916667
0.27	0.824	0.912	0.925
0.28	0.832	0.92	0.933333
0.29	0.84	0.928	0.933333
0.3	0.84	0.936	0.933333
0.31	0.84	0.936	0.933333
0.32	0.848	0.944	0.941667
0.33	0.864	0.952	0.95
0.34	0.896	0.952	0.95
0.35	0.896	0.968	0.958333
0.36	0.896	0.968	0.975
0.37	0.904	0.976	0.983333
0.38	0.904	0.984	0.991667
0.39	0.912	0.984	0.991667
0.4	0.92	0.984	0.991667
0.41	0.92	0.992	0.991667
0.42	0.92	0.992	0.991667
0.43	0.92	0.992	0.991667
0.44	0.92	0.992	0.991667
0.45	0.928	0.992	0.991667
0.46	0.928	0.992	0.991667
0.47	0.928	0.992	0.991667
0.48	0.928	0.992	0.991667
0.49	0.928	0.992	0.991667
0.5	0.928	0.992	0.991667
0.51	0.928	1	0.991667
0.52	0.928	1	1
0.53	0.928	1	1
0.54	0.928	1	1
0.55	0.928	1	1
0.56	0.928	1	1
0.57	0.928	1	1
0.58	0.928	1	1
0.59	0.936	1	1
0.6	0.936	1	1
0.61	0.936	1	1
0.62	0.936	1	1
0.63	0.936	1	1
0.64	0.936	1	1
0.65	0.936	1	1
0.66	0.936	1	1
0.67	0.936	1	1
0.68	0.936	1	1
0.69	0.936	1	1
0.7	0.936	1	1
0.71	0.944	1	1
0.72	0.952	1	1
0.73	0.952	1	1
0.74	0.952	1	1
0.75	0.952	1	1
0.76	0.952	1	1
0.77	0.952	1	1
0.78	0.952	1	1
0.79	0.952	1	1
0.8	0.96	1	1
0.81	0.96	1	1
0.82	0.96	1	1
0.83	0.96	1	1
0.84	0.96	1	1
0.85	0.96	1	1
0.86	0.96	1	1
0.87	0.96	1	1
0.88	0.968	1	1
0.89	0.968	1	1
0.9	0.968	1	1
0.91	0.968	1	1
0.92	0.968	1	1
0.93	0.976	1	1
0.94	0.984	1	1
0.95	0.992	1	1
0.96	0.992	1	1
0.97	0.992	1	1
0.98	0.992	1	1
0.99	0.992	1	1
1	1	1	1
