# Supplementary material for: Circular RNA profiles of osteoarthritic synovium
Source: Royal Society of Chemistry journal article supplement (doi:10.1039/d2mo00066k), 2022-03-31
Supplement: d2mo00066k4.xlsx [file d2mo00066k4.xlsx]

## Sheet: Sheet1
Divergent primers of circRNAs and GAPDH
hsa_circ_0001306 forward	5'-CCTCGTGATCTGCCCTCTT-3'
hsa_circ_0001306 reverse	5'-CCTTACCTCAATCTTACTCCTCC-3'
hsa_circ_0072697 forward	5'-TCATGAGAGTCTTTGATGAATCACT-3'
hsa_circ_0072697 reverse	5'-ATACATGGATGCACTGGGGAG-3'
hsa_circ_0004872 forward	5’-GTTGCAGATCCAGACCATGA-3’
hsa_circ_0004872 reverse	5’-CAGGGTTCTCTGGCAGTAGG-3’
hsa_circ_0001633 forward	5’-GGCTATTCAGGGCTTGCCAC-3’
hsa_circ_0001633 reverse	5’-GCCATACCAGCCAAGGAGTTC-3’
hsa_circ_0001776 forward	5’-TCAAACCTCGACAAGGTGCT-3’
hsa_circ_0001776 reverse	5’-CCTTAGAACACCCGGAAGGT-3’
hsa_circ_0006731 forward	5’-AGTGTGCCAACCCAAAGAAG-3’
hsa_circ_0006731 reverse	5’-CATTAATTGCCAAGCGAGGT-3’
GAPDH forward	5’-ACAGCCTCAAGATCATCAGC-3’
GAPDH reverse	5’-GGTCATGAGTCCTTCCACGAT-3’
