# Supplementary material for: Circular RNA profiles of osteoarthritic synovium
Source: Royal Society of Chemistry journal article supplement (doi:10.1039/d2mo00066k), 2022-03-31
Supplement: d2mo00066k5.xlsx [file d2mo00066k5.xlsx]

## Sheet: Sheet1
Raw data of qRT-PCR
CT value
	GAPDH	hsa_circ_0001306	hsa_circ_0072697	hsa_circ_0004872	hsa_circ_0001633	hsa_circ_0001776	hsa_circ_0006731
Control1	18.59	27.52	31.84	28.87	29.44	28.17	31.57
	18.45	27.17	31.83	29.15	29.17	28.41	32.07
	18.28	27.17	31.83	29.21	29.34	28.27	32.19
Control2	22.36	30.35	30.45	31.8	31.69	28.79	33.67
	22.43	30.63	31.12	31.86	31.2	28.99	32.84
	22.43	31.08	31.34	31.01	30.94	28.81	32.71
Control3	20.81	28.97	30.62	30.19	30.94	28.53	32.56
	20.82	28.95	30.59	30.27	30.62	28.79	31.93
	20.5	29.09	30.08	29.96	30.68	28.76	32.53
Control4	16.13	26.64	30.32	27.18	28.06	26.39	29.08
	15.89	27	30.1	27.26	28.08	26.54	28.91
	15.96	26.61	30.09	27.28	27.63	26.62	29.13
Patient1	24.17	30.74	32.95	32.12	31.69	30.65	34.37
	24.1	31.81	33.3	33.71	32.95	30.73	37.51
	24.01	31	33.18	32.13	32.43	29.98	33.98
Patient2	20.64	27.74	27.89	30.18	30.34	29.39	32.98
	20.65	27.82	28.06	29.85	31.01	29.13	33.36
	20.62	28.06	28.06	30.04	31.88	29.32	32.09
Patient3	23.62	32.08	30.3	32.74	32.39	30.85	37.73
	23.62	32.86	29.86	32.2	33.75	30.88	33.78
	23.58	35.95	30.2	33	32.35	30.39	35.22
Patient4	20.99	27.57	27.48	31.18	31.66	28.52	30.81
	21.15	27.55	27.35	30.86	32.6	28.52	30.04
	21.03	27.55	27.55	31.49	32.39	28.79	30.49
Average CT value
	GAPDH	hsa_circ_0001306	hsa_circ_0072697	hsa_circ_0004872	hsa_circ_0001633	hsa_circ_0001776	hsa_circ_0006731
Control1	18.44	27.2867	31.8333	29.0767	29.3167	28.2833	31.9433
Control2	22.4067	30.6867	30.97	31.5567	31.2767	28.8633	33.0733
Control3	20.71	29.0033	30.43	30.23	30.7467	28.6933	32.34
Control4	15.9933	26.75	30.17	27.24	27.9233	26.5167	29.04
Patient1	24.0933	31.1833	33.24	32.6533	32.3567	30.4533	34.175
Patient2	20.6367	27.8733	28.0033	30.0233	31.0767	29.28	32.81
Patient3	23.6067	32.47	30.12	32.6467	32.83	30.7067	34.5
Patient4	21.0567	27.5567	27.46	31.1767	32.2167	28.61	30.4467
ΔCt value
		hsa_circ_0001306	hsa_circ_0072697	hsa_circ_0004872	hsa_circ_0001633	hsa_circ_0001776	hsa_circ_0006731
Control1		8.84667	13.3933	10.6367	10.8767	9.84333	13.5033
Control2		8.28	8.56333	9.15	8.87	6.45667	10.6667
Control3		8.29333	9.72	9.52	10.0367	7.98333	11.63
Control4		10.7567	14.1767	11.2467	11.93	10.5233	13.0467
Patient1		7.09	9.14667	8.56	8.26333	6.36	10.0817
Patient2		7.23667	7.36667	9.38667	10.44	8.64333	12.1733
Patient3		8.86333	6.51333	9.04	9.22333	7.1	10.8933
Patient4		6.5	6.40333	10.12	11.16	7.55333	9.39
2-ΔCt value
		hsa_circ_0001306	hsa_circ_0072697	hsa_circ_0004872	hsa_circ_0001633	hsa_circ_0001776	hsa_circ_0006731
Control1		0.00217214	9.29405e-05	0.000628122	0.00053186	0.00108858	8.61175e-05
Control2		0.00321715	0.0026435	0.00176025	0.00213729	0.0113854	0.000615196
Control3		0.00318756	0.00118574	0.00136205	0.000952056	0.00395164	0.000315516
Control4		0.00057799	5.40005e-05	0.000411544	0.000256278	0.000679455	0.000118185
Patient1		0.00734002	0.00176433	0.00264962	0.00325453	0.0121744	0.000922818
Patient2		0.0066305	0.00605916	0.00149394	0.000719858	0.00250091	0.000216502
Patient3		0.00214719	0.0109469	0.00189972	0.00167302	0.00728932	0.000525751
Patient4		0.0110485	0.0118142	0.000898621	0.000437024	0.00532378	0.00149049
	Control1	Control2	Control3	Control4	Patient1	Patient2	Patient3	Patient4
hsa_circ_0001306	0.00217214	0.00321715	0.00318756	0.00057799	0.00734002	0.0066305	0.00214719	0.0110485
Average of 2-ΔCt value of Controls	0.00228871
2-ΔCtΔCt	0.949068	1.40566	1.39273	0.25254	3.20706	2.89705	0.938167	4.82741
hsa_circ_0072697	9.29405e-05	0.0026435	0.00118574	5.40005e-05	0.00176433	0.00605916	0.0109469	0.0118142
Average of 2-ΔCt value of Controls	0.000994045
2-ΔCtΔCt	0.0934972	2.65934	1.19284	0.054324	1.7749	6.09546	11.0125	11.885
hsa_circ_0004872	0.000628122	0.00176025	0.00136205	0.000411544	0.00264962	0.00149394	0.00189972	0.000898621
Average of 2-ΔCt value of Controls	0.00104049
2-ΔCtΔCt	0.603677	1.69175	1.30905	0.395527	2.5465	1.43579	1.82578	0.863648
hsa_circ_0001633	0.00053186	0.00213729	0.000952056	0.000256278	0.00325453	0.000719858	0.00167302	0.000437024
Average of 2-ΔCt value of Controls	0.000969372
2-ΔCtΔCt	0.548664	2.20482	0.982137	0.264376	3.35736	0.742603	1.72588	0.450832
hsa_circ_0001776	0.00108858	0.0113854	0.00395164	0.000679455	0.0121744	0.00250091	0.00728932	0.00532378
Average of 2-ΔCt value of Controls	0.00427628
2-ΔCtΔCt	0.254563	2.66246	0.924084	0.158889	2.84697	0.584832	1.70459	1.24496
hsa_circ_0006731	8.61175e-05	0.000615196	0.000315516	0.000118185	0.000922818	0.000216502	0.000525751	0.00149049
Average of 2-ΔCt value of Controls	0.000283754
2-ΔCtΔCt	0.303494	2.16806	1.11194	0.416505	3.25218	0.762992	1.85284	5.25275
Remarks: The red value represents an abnormality in the dissolution curve, which was eliminated during the analysis.
