# Supplementary material for: Circular RNA profiles of osteoarthritic synovium
Source: Royal Society of Chemistry journal article supplement (doi:10.1039/d2mo00066k), 2022-03-31
Supplement: d2mo00066k6.xlsx [file d2mo00066k6.xlsx]

## Sheet: up_Patient_vs_Control
Differentially expressed circRNAs for: up_Patient_vs_Control Fold Change cut-off: 2.0 P-value cut-off: 0.05 Column A: CircRNAID, the ID of the identified circRNA by DCC. Column B ~ G: edgeR results for differentially expressed circRNAs. Column H ~ M: junction reads, the junction read number of each sample. Column N ~ S: logCPM by edgeR. Column S ~ W: the coordinates of circRNA. Column X: circBase…
	Patient_vs_Control up regulated circRNAs
	P-value, Fold change and Regulation						junction reads						logCPM by edgeR						Annotations
CircRNAID	logFC	logCPM	F	PValue	FDR	regulation	Patient1	Patient2	Patient3	Control1	Control2	Control3	Patient1	Patient2	Patient3	Control1	Control2	Control3	chrom	txStart	txEnd	strand	circBaseID	source	best_transcript	GeneName	Catalog	predicted_sequence_length	circRNA-associated diseases
chr3:51575514-51586079+	8.07876	10.3294	8.84118	0.00294766	0.319173	up	9	35	22	0	0	0	9.27267	11.6487	11.7835	7.09722	7.09722	7.09722	chr3	51575513	51586079	+	hsa_circ_0001306	circBase	NM_015106	RAD54L2	sense overlapping	10566	acute lymphoblastic leukemia (ALL), acute myeloid leukemia (AML), cardiac hypertrophy, colorectal cancer, lung cancer, non-alcoholic fatty liver disease (NAFLD), prostate cancer
chr8:17868746-17869336+	6.97012	9.38193	6.24186	0.0124824	0.319173	up	0	2	20	0	0	0	7.09722	8.28807	11.6516	7.09722	7.09722	7.09722	chr8	17868745	17869336	+	hsa_circ_0083465	circBase	NM_006197	PCM1	exonic	291
chr7:76922269-76924255+	6.89978	9.32515	6.08748	0.0136204	0.319173	up	6	0	18	0	0	0	8.83916	7.09722	11.5064	7.09722	7.09722	7.09722	chr7	76922268	76924255	+	hsa_circ_0134678	circBase	NM_020879	CCDC146	sense overlapping	1987
chr9:98740343-98766983+	6.87985	9.30782	6.04952	0.0139162	0.319173	up	1	18	9	0	0	0	7.57314	10.7464	10.5728	7.09722	7.09722	7.09722	chr9	98740342	98766983	+	hsa_circ_0008720	circBase	NM_020207	ERCC6L2	exonic	337
chr11:92085262-92088570+	6.85731	9.29189	5.98944	0.014398	0.319173	up	0	1	19	0	0	0	7.09722	7.81218	11.5808	7.09722	7.09722	7.09722	chr11	92085261	92088570	+	hsa_circ_0000348	circBase	NM_001008781	FAT3	exonic	3309
chr20:2928628-2945848+	6.82253	9.26156	5.92617	0.014924	0.319173	up	12	15	6	0	0	0	9.60557	10.5061	10.0512	7.09722	7.09722	7.09722	chr20	2928627	2945848	+	hsa_circ_0005265	circBase	NM_002836	PTPRA	exonic	464
chr5:64863340-64868113+	6.78505	9.23262	5.8383	0.0156876	0.319173	up	19	3	10	0	0	0	10.172	8.64531	10.7117	7.09722	7.09722	7.09722	chr5	64863339	64868113	+	hsa_circ_0072697	circBase	NM_015342	PPWD1	exonic	773
chrX:139865365-139865527+	6.74727	9.20237	5.74949	0.0165001	0.319173	up	19	9	6	0	0	0	10.172	9.85699	10.0512	7.09722	7.09722	7.09722	chrX	139865364	139865527	+		novel	uc004fbf.1	AK054921	sense overlapping	163
chr8:37734627-37735069-	6.74174	9.19954	5.72872	0.0166964	0.319173	up	5	9	11	0	0	0	8.65991	9.85699	10.8385	7.09722	7.09722	7.09722	chr8	37734626	37735069	-	hsa_circ_0001789	circBase	NM_025151	RAB11FIP1	exonic	443
chr6:31239010-31324103-	6.72258	9.18508	5.67999	0.0171663	0.319173	up	9	1	14	0	0	0	9.27267	7.81218	11.1631	7.09722	7.09722	7.09722	chr6	31239009	31324103	-		novel	NM_002117	HLA-C	sense overlapping	85094
chr5:70331372-70333373-	6.61818	9.10305	5.4365	0.0197274	0.319173	up	20	4	7	0	0	0	10.2374	8.93142	10.2468	7.09722	7.09722	7.09722	chr5	70331371	70333373	-		novel	uc003kat.1	NAIP	intronic	2002
chr6:13579683-13584457+	6.60038	9.09137	5.38281	0.0203435	0.319173	up	5	1	14	0	0	0	8.65991	7.81218	11.1631	7.09722	7.09722	7.09722	chr6	13579682	13584457	+	hsa_circ_0007218	circBase	NM_012241	SIRT5	exonic	309
chr15:44620883-44673174+	6.49269	9.00908	5.13698	0.0234292	0.319173	up	0	14	7	0	0	0	7.09722	10.4163	10.2468	7.09722	7.09722	7.09722	chr15	44620882	44673174	+	hsa_circ_0035052	circBase	NM_138423	CASC4	exonic	690
chr16:74493580-74497377-	6.44812	8.97703	5.0274	0.0249573	0.319173	up	0	3	13	0	0	0	7.09722	8.64531	11.0628	7.09722	7.09722	7.09722	chr16	74493579	74497377	-	hsa_circ_0003315	circBase	NM_012201	GLG1	exonic	477
chr7:65705312-65751696+	6.44379	8.97249	5.02735	0.0249581	0.319173	up	12	4	8	0	0	0	9.60557	8.93142	10.419	7.09722	7.09722	7.09722	chr7	65705311	65751696	+	hsa_circ_0006041	circBase	NM_003596	TPST1	exonic	1145
chr3:178921332-178922376+	6.43546	8.96517	5.01673	0.0251115	0.319173	up	10	17	1	0	0	0	9.39238	10.6706	8.18458	7.09722	7.09722	7.09722	chr3	178921331	178922376	+	hsa_circ_0122803	circBase	NM_006218	PIK3CA	exonic	332
chr7:121753172-121773795-	6.42452	8.95849	4.98314	0.0256036	0.319173	up	5	8	8	0	0	0	8.65991	9.71345	10.419	7.09722	7.09722	7.09722	chr7	121753171	121773795	-	hsa_circ_0006919	circBase	NM_005763	AASS	exonic	1293
chr22:28290543-28310335-	6.42331	8.95729	4.98297	0.0256061	0.319173	up	4	12	6	0	0	0	8.45518	10.2178	10.0512	7.09722	7.09722	7.09722	chr22	28290542	28310335	-	hsa_circ_0062688	circBase	NM_012399	PITPNB	exonic	436
chr6:89793472-89794362+	6.38446	8.9292	4.89536	0.0269372	0.319173	up	6	5	9	0	0	0	8.83916	9.17007	10.5728	7.09722	7.09722	7.09722	chr6	89793471	89794362	+	hsa_circ_0132617	circBase	NM_006813	PNRC1	sense overlapping	891
chr3:170906491-170912424-	6.36268	8.91355	4.8461	0.0277171	0.319173	up	8	0	11	0	0	0	9.14213	7.09722	10.8385	7.09722	7.09722	7.09722	chr3	170906490	170912424	-	hsa_circ_0002387	circBase	NM_015028	TNIK	exonic	333
chr18:60206914-60217693+	6.33221	8.89121	4.78223	0.0287634	0.319173	up	3	6	9	0	0	0	8.21653	9.37479	10.5728	7.09722	7.09722	7.09722	chr18	60206913	60217693	+	hsa_circ_0000854	circBase	NM_017742	ZCCHC2	exonic	374	Alzheimer's disease, Burkitt lymphoma, Down syndrome (DS), Hodgkin's lymphoma, acute lymphoblastic leukemia (ALL), acute myeloid leukemia (AML), acute promyelocytic leukemia (APL), adenoma, breast cancer, cardiac hypertrophy, cervical cancer, cholangiocarcinoma, chronic lymphocytic leukemia (CLL), colorectal cancer, diffuse large B-cell lymphoma (DLBCL), epithelial ovarian cancer (EOC), facioscap…
chr14:31596991-31602881-	6.31234	8.87669	4.74113	0.0294582	0.319173	up	2	8	8	0	0	0	7.93041	9.71345	10.419	7.09722	7.09722	7.09722	chr14	31596990	31602881	-	hsa_circ_0002301	circBase	ENST00000399332	HECTD1	exonic	1403
chr5:130797398-130883883-	6.31021	8.87457	4.74217	0.0294406	0.319173	up	0	16	4	0	0	0	7.09722	10.5907	9.55649	7.09722	7.09722	7.09722	chr5	130797397	130883883	-	hsa_circ_0127887	circBase	NM_016340	RAPGEF6	exonic	2513
chr16:53288350-53308214+	6.30099	8.86752	4.72843	0.0296765	0.319173	up	18	3	5	0	0	0	10.1034	8.64531	9.82497	7.09722	7.09722	7.09722	chr16	53288349	53308214	+	hsa_circ_0000702	circBase	NM_025134	CHD9	exonic	1106	acute lymphoblastic leukemia (ALL), acute myeloid leukemia (AML), cardiac hypertrophy, colorectal cancer, lung cancer, non-alcoholic fatty liver disease (NAFLD), prostate cancer
chr11:78176922-78204241-	6.29246	8.8616	4.70989	0.0299982	0.319173	up	6	12	4	0	0	0	8.83916	10.2178	9.55649	7.09722	7.09722	7.09722	chr11	78176921	78204241	-	hsa_circ_0005935	circBase	NM_024678	NARS2	exonic	475
chr7:139415731-139416814-	6.21899	8.80852	4.57739	0.0324054	0.319173	up	14	11	1	0	0	0	9.79128	10.1072	8.18458	7.09722	7.09722	7.09722	chr7	139415730	139416814	-	hsa_circ_0001756	circBase	NM_022740	HIPK2	exonic	1084	acute lymphoblastic leukemia (ALL), acute myeloid leukemia (AML), asthma, breast cancer, cardiac hypertrophy, colorectal cancer, epithelial ovarian cancer (EOC), esophageal cancer, head and neck squamous cell carcinoma (HNSCC), hepatocellular carcinoma (HCC), lung cancer, malignant melanoma, non-alcoholic fatty liver disease (NAFLD), non-small cell lung cancer (NSCLC), ovarian cancer (OC), prosta…
chr4:95494502-95507595+	6.19609	8.79227	4.53546	0.0332085	0.319173	up	22	4	2	0	0	0	10.3599	8.93142	8.79752	7.09722	7.09722	7.09722	chr4	95494501	95507595	+	hsa_circ_0070467	circBase	NM_006457	PDLIM5	exonic	672
chr3:138218952-138251412-	6.15901	8.7667	4.46317	0.0346423	0.319173	up	5	14	2	0	0	0	8.65991	10.4163	8.79752	7.09722	7.09722	7.09722	chr3	138218951	138251412	-	hsa_circ_0122112	circBase	NM_024491	CEP70	exonic	1017
chr22:22153301-22162135-	6.15637	8.76465	4.4614	0.0346781	0.319173	up	13	9	2	0	0	0	9.70141	9.85699	8.79752	7.09722	7.09722	7.09722	chr22	22153300	22162135	-	hsa_circ_0004872	circBase	NM_002745	MAPK1	exonic	490
chr14:23375404-23380612-	6.13959	8.75299	4.43176	0.0352853	0.319173	up	11	10	2	0	0	0	9.50291	9.98754	8.79752	7.09722	7.09722	7.09722	chr14	23375403	23380612	-	hsa_circ_0031241	circBase	NM_018107	RBM23	exonic	363
chr18:19116003-19148055-	6.12259	8.74123	4.40181	0.0359101	0.319173	up	9	11	2	0	0	0	9.27267	10.1072	8.79752	7.09722	7.09722	7.09722	chr18	19116002	19148055	-	hsa_circ_0008520	circBase	NM_052911	ESCO1	exonic	657
chr1:233353645-233363117-	6.10946	8.7328	4.36897	0.0366083	0.319173	up	1	9	6	0	0	0	7.57314	9.85699	10.0512	7.09722	7.09722	7.09722	chr1	233353644	233363117	-	hsa_circ_0003314	circBase	NM_014801	PCNXL2	exonic	333
chr3:172003716-172028671+	6.10537	8.72935	4.37154	0.0365532	0.319173	up	7	12	2	0	0	0	8.99858	10.2178	8.79752	7.09722	7.09722	7.09722	chr3	172003715	172028671	+	hsa_circ_0002422	circBase	NM_022763	FNDC3B	exonic	464
chr2:53977920-53992722-	6.07068	8.70659	4.29234	0.0382938	0.319173	up	1	0	11	0	0	0	7.57314	7.09722	10.8385	7.09722	7.09722	7.09722	chr2	53977919	53992722	-	hsa_circ_0002416	circBase	NM_016115	ASB3	exonic	368
chr3:143704385-143708679+	6.06567	8.70196	4.3051	0.0380076	0.319173	up	20	0	4	0	0	0	10.2374	7.09722	9.55649	7.09722	7.09722	7.09722	chr3	143704384	143708679	+	hsa_circ_0006731	circBase	ENST00000493396	C3orf58	intronic	4295
chr8:37623044-37623873+	6.06064	8.69879	4.29152	0.0383123	0.319173	up	7	8	4	0	0	0	8.99858	9.71345	9.55649	7.09722	7.09722	7.09722	chr8	37623043	37623873	+	hsa_circ_0001788	circBase	NM_007198	PROSC	exonic	220	Alzheimer's disease, B-cell lymphoma, Hodgkin's lymphoma, T-cell leukemia, acute myeloid leukemia (AML), autism spectrum disorder (ASD), breast cancer, chronic lymphocytic leukemia (CLL), chronic myeloid leukemia (CML), colorectal cancer, diffuse large B-cell lymphoma (DLBCL), epithelial ovarian cancer (EOC), esophageal cancer, follicular lymphoma (FL), gastric cancer (stomach cancer), glioma, he…
chr5:76758920-76760634-	6.03589	8.68238	4.23977	0.039497	0.319173	up	2	4	8	0	0	0	7.93041	8.93142	10.419	7.09722	7.09722	7.09722	chr5	76758919	76760634	-	hsa_circ_0001498	circBase	NM_018268	WDR41	exonic	181
chr4:40121552-40123929+	6.03213	8.6793	4.24422	0.0393937	0.319173	up	8	7	4	0	0	0	9.14213	9.55404	9.55649	7.09722	7.09722	7.09722	chr4	40121551	40123929	+	hsa_circ_0126339	circBase	NM_018177	N4BP2	exonic	2378
chr6:167435897-167438382+	6.01122	8.66534	4.20499	0.0403147	0.319173	up	0	10	5	0	0	0	7.09722	9.98754	9.82497	7.09722	7.09722	7.09722	chr6	167435896	167438382	+	hsa_circ_0004556	circBase	NM_007045	FGFR1OP	exonic	340
chr8:90734243-90737869-	5.99997	8.65718	4.19766	0.0404894	0.319173	up	16	5	2	0	0	0	9.95578	9.17007	8.79752	7.09722	7.09722	7.09722	chr8	90734242	90737869	-	hsa_circ_0008587	circBase	NR_125822	LOC101929709	exonic	604
chr7:30590252-30601744-	5.99546	8.65466	4.17692	0.0409878	0.319173	up	5	5	6	0	0	0	8.65991	9.17007	10.0512	7.09722	7.09722	7.09722	chr7	30590251	30601744	-	hsa_circ_0001693	circBase	uc003tbd.3	LOC401320	exonic	809	Cerebellar neurodegeneration, Duchenne muscular dystrophy (DMD), Glomerulosclerosis, Hodgkin's lymphoma, acute myeloid leukemia (AML), anaplastic thyroid carcinoma (ATC), bladder cancer, cardiac hypertrophy, chronic lymphocytic leukemia (CLL), colorectal cancer, head and neck squamous cell carcinoma (HNSCC), malignant melanoma, miyoshi myopathy (MM), nemaline myopathy (NM), non-alcoholic fatty li…
chr8:41905896-41907225-	5.96288	8.63283	4.11245	0.0425784	0.319173	up	0	6	7	0	0	0	7.09722	9.37479	10.2468	7.09722	7.09722	7.09722	chr8	41905895	41907225	-	hsa_circ_0002754	circBase	ENST00000396930	KAT6A	exonic	1057
chr6:144858718-144864006+	5.9384	8.61655	4.06097	0.0438951	0.319173	up	1	0	10	0	0	0	7.57314	7.09722	10.7117	7.09722	7.09722	7.09722	chr6	144858717	144864006	+	hsa_circ_0130908	circBase	NM_007124	UTRN	exonic	362
chr1:222897434-222898897+	5.93184	8.61191	4.05971	0.0439279	0.319173	up	0	9	5	0	0	0	7.09722	9.85699	9.82497	7.09722	7.09722	7.09722	chr1	222897433	222898897	+	hsa_circ_0003413	circBase	NM_144695	BROX	exonic	179
chr14:60749402-60750255+	5.92887	8.60977	4.06172	0.0438756	0.319173	up	7	8	3	0	0	0	8.99858	9.71345	9.22635	7.09722	7.09722	7.09722	chr14	60749401	60750255	+	hsa_circ_0032108	circBase	NM_021003	PPM1A	exonic	854
chr4:128842679-128861152-	5.91769	8.60232	4.04264	0.0443743	0.319173	up	10	6	3	0	0	0	9.39238	9.37479	9.22635	7.09722	7.09722	7.09722	chr4	128842678	128861152	-	hsa_circ_0009133	circBase	NM_152778	MFSD8	exonic	797
chr8:11152703-11157657+	5.90025	8.59085	4.00636	0.0453388	0.319173	up	0	12	3	0	0	0	7.09722	10.2178	9.22635	7.09722	7.09722	7.09722	chr8	11152702	11157657	+	hsa_circ_0135466	circBase	NM_015458	MTMR9	exonic	235
chr11:108106397-108119829+	5.88674	8.58207	3.96623	0.0464316	0.319173	up	0	0	10	0	0	0	7.09722	7.09722	10.7117	7.09722	7.09722	7.09722	chr11	108106396	108119829	+	hsa_circ_0000356	circBase	NM_000051	ATM	exonic	904	Duchenne muscular dystrophy (DMD), acute myeloid leukemia (AML), breast cancer, cardiac hypertrophy, cholangiocarcinoma, chronic lymphocytic leukemia (CLL), colorectal cancer, facioscapulohumeral muscular dystrophy (FSHD), glioblastoma multiforme (GBM), head and neck squamous cell carcinoma (HNSCC), kidney cancer, limb-girdle muscular dystrophies types 2A (LGMD2A), lung cancer, malignant melanoma…
chr10:111883775-111892158+	5.88674	8.58207	3.96623	0.0464316	0.319173	up	0	0	10	0	0	0	7.09722	7.09722	10.7117	7.09722	7.09722	7.09722	chr10	111883774	111892158	+	hsa_circ_0092631	circBase	NM_016824	ADD3	exonic	685
chr10:7409611-7423911-	5.88052	8.57789	3.9625	0.0465346	0.319173	up	0	5	7	0	0	0	7.09722	9.17007	10.2468	7.09722	7.09722	7.09722	chr10	7409610	7423911	-	hsa_circ_0017648	circBase	NM_001018039	SFMBT2	exonic	487
chr6:126314903-126334247+	5.87793	8.57616	3.96188	0.0465518	0.319173	up	8	0	7	0	0	0	9.14213	7.09722	10.2468	7.09722	7.09722	7.09722	chr6	126314902	126334247	+	hsa_circ_0077789	circBase	NM_001031712	TRMT11	exonic	1067
chr5:139819704-139825560+	5.8743	8.57376	3.95859	0.0466427	0.319173	up	0	10	4	0	0	0	7.09722	9.98754	9.55649	7.09722	7.09722	7.09722	chr5	139819703	139825560	+	hsa_circ_0001540	circBase	NM_017747	ANKHD1	exonic	530
chr13:48989836-48996926-	5.8743	8.57376	3.95859	0.0466427	0.319173	up	0	10	4	0	0	0	7.09722	9.98754	9.55649	7.09722	7.09722	7.09722	chr13	48989835	48996926	-		novel	NM_005767	LPAR6	exonic	658
chr22:28269726-28310335-	5.86243	8.56596	3.94333	0.0470675	0.319173	up	2	12	2	0	0	0	7.93041	10.2178	8.79752	7.09722	7.09722	7.09722	chr22	28269725	28310335	-	hsa_circ_0004441	circBase	NM_012399	PITPNB	exonic	514
chr10:111883775-111890244+	5.84781	8.55638	3.90985	0.0480141	0.319173	up	0	8	5	0	0	0	7.09722	9.71345	9.82497	7.09722	7.09722	7.09722	chr10	111883774	111890244	+	hsa_circ_0003357	circBase	NM_001121	ADD3	exonic	589
chr1:31465237-31468067-	5.84781	8.55638	3.90985	0.0480141	0.319173	up	0	8	5	0	0	0	7.09722	9.71345	9.82497	7.09722	7.09722	7.09722	chr1	31465236	31468067	-	hsa_circ_0000043	circBase	NM_014676	PUM1	exonic	438	acute lymphoblastic leukemia (ALL), acute myeloid leukemia (AML), bladder cancer, breast cancer, cardiac hypertrophy, cervical cancer, chronic lymphocytic leukemia (CLL), colorectal cancer, epithelial ovarian cancer (EOC), glioblastoma, hepatocellular carcinoma (HCC), kidney cancer, lung cancer, malignant melanoma, neuroblastoma (NB), pancreatic cancer, prostate cancer, retinitis pigmentosa (RP),…
chr6:107824861-107827631+	5.84523	8.55471	3.90929	0.0480299	0.319173	up	8	3	5	0	0	0	9.14213	8.64531	9.82497	7.09722	7.09722	7.09722	chr6	107824860	107827631	+	hsa_circ_0001633	circBase	NM_018013	SOBP	exonic	325	acute myeloid leukemia (AML), breast cancer, colorectal cancer, epithelial ovarian cancer (EOC), hepatocellular carcinoma (HCC), kidney cancer, lung cancer, malignant melanoma, prostate cancer, retinitis pigmentosa (RP)
chr3:56703728-56707753-	5.83599	8.54866	3.89067	0.0485652	0.319173	up	3	6	5	0	0	0	8.21653	9.37479	9.82497	7.09722	7.09722	7.09722	chr3	56703727	56707753	-	hsa_circ_0001316	circBase	NM_001112736	FAM208A	exonic	404	acute lymphoblastic leukemia (ALL), acute myeloid leukemia (AML), bladder cancer, cardiac hypertrophy, cervical cancer, chronic lymphocytic leukemia (CLL), glioblastoma, hepatocellular carcinoma (HCC), malignant melanoma, neuroblastoma (NB), pancreatic cancer, prostate cancer, uterine leiomyoma (ULM)
chr15:81271272-81274523-	5.83301	8.54682	3.89768	0.048363	0.319173	up	9	9	1	0	0	0	9.27267	9.85699	8.18458	7.09722	7.09722	7.09722	chr15	81271271	81274523	-	hsa_circ_0000645	circBase	NR_126327	MESDC2	exonic	780
chr18:42281140-42339068+	5.81451	8.53474	3.85652	0.0495631	0.319173	up	0	11	3	0	0	0	7.09722	10.1072	9.22635	7.09722	7.09722	7.09722	chr18	42281139	42339068	+	hsa_circ_0108447	circBase	NM_015559	SETBP1	sense overlapping	57929
chr7:115750762-115752092-	5.68481	10.3382	5.53333	0.0186647	0.319173	up	0	0	45	0	0	2	7.09722	7.09722	12.787	7.09722	7.09722	7.8995	chr7	115750761	115752092	-		PMID:25070500	ENST00000484212	TFEC	exonic	266
chr7:24663285-24690331+	5.55036	9.71971	4.7322	0.0296116	0.319173	up	8	3	23	1	0	0	9.14213	8.64531	11.8452	7.68703	7.09722	7.09722	chr7	24663284	24690331	+	hsa_circ_0001685	circBase	NM_016447	MPP6	exonic	653
chr2:200233328-200298237-	5.24342	9.33579	4.00159	0.0454672	0.319173	up	0	0	20	0	0	1	7.09722	7.09722	11.6516	7.09722	7.09722	7.55342	chr2	200233327	200298237	-	hsa_circ_0003915	circBase	NM_015265	SATB2	exonic	531
chr7:158552177-158557544-	4.54454	10.7892	4.28797	0.0383924	0.319173	up	29	34	32	0	2	5	10.7217	11.6087	12.3065	7.09722	7.99285	8.61305	chr7	158552176	158557544	-	hsa_circ_0001776	circBase	NM_020728	ESYT2	exonic	495	Duchenne muscular dystrophy (DMD), acute myeloid leukemia (AML), breast cancer, cardiac hypertrophy, cholangiocarcinoma, chronic lymphocytic leukemia (CLL), colorectal cancer, facioscapulohumeral muscular dystrophy (FSHD), glioblastoma multiforme (GBM), head and neck squamous cell carcinoma (HNSCC), kidney cancer, limb-girdle muscular dystrophies types 2A (LGMD2A), lung cancer, malignant melanoma…

## Sheet: down_Patient_vs_Control
Differentially expressed circRNAs for: down_Patient_vs_Control Fold Change cut-off: 2.0 P-value cut-off: 0.05 Column A: CircRNAID, the ID of the identified circRNA by DCC. Column B ~ G: edgeR results for differentially expressed circRNAs. Column H ~ M: junction reads, the junction read number of each sample. Column N ~ S: logCPM by edgeR. Column S ~ W: the coordinates of circRNA. Column X: circBa…
	Patient_vs_Control down regulated circRNAs
	P-value, Fold change and Regulation						junction reads						logCPM by edgeR						Annotations
CircRNAID	logFC	logCPM	F	PValue	FDR	regulation	Patient1	Patient2	Patient3	Control1	Control2	Control3	Patient1	Patient2	Patient3	Control1	Control2	Control3	chrom	txStart	txEnd	strand	circBaseID	source	best_transcript	GeneName	Catalog	predicted_sequence_length	circRNA-associated diseases
chr15:50935537-50955243-	-8.00472	10.271	7.8019	0.0052228	0.319173	down	0	0	0	73	0	30	7.09722	7.09722	7.09722	12.3401	7.09722	10.701	chr15	50935536	50955243	-	hsa_circ_0004951	circBase	NM_017672	TRPM7	exonic	532
chr12:49333438-49334971-	-7.98343	10.2521	7.7542	0.00536248	0.319173	down	0	0	0	65	6	32	7.09722	7.09722	7.09722	12.1774	8.93768	10.7867	chr12	49333437	49334971	-	hsa_circ_0003770	circBase	NM_001659	ARF3	exonic	477
chr5:82832826-82850857+	-7.93934	10.2129	7.65572	0.00566309	0.319173	down	0	0	0	62	1	38	7.09722	7.09722	7.09722	12.1113	7.61345	11.0169	chr5	82832825	82850857	+	hsa_circ_0073239	circBase	NM_004385	VCAN	exonic	5732
chr6:100009243-100010824-	-7.86917	10.151	7.50055	0.00617205	0.319173	down	0	0	0	60	0	36	7.09722	7.09722	7.09722	12.0654	7.09722	10.9441	chr6	100009242	100010824	-	hsa_circ_0077438	circBase	NM_005190	CCNC	exonic	262
chr5:32121601-32143986-	-7.84794	10.1322	7.45449	0.00633192	0.319173	down	0	0	0	49	1	48	7.09722	7.09722	7.09722	11.7836	7.61345	11.3339	chr5	32121600	32143986	-	hsa_circ_0128830	circBase	NM_022130	GOLPH3	sense overlapping	22386
chr16:24979672-24981901-	-7.78989	10.0814	7.32797	0.00679323	0.319173	down	0	0	0	57	5	28	7.09722	7.09722	7.09722	11.9939	8.75305	10.6099	chr16	24979671	24981901	-	hsa_circ_0004260	circBase	NM_018054	ARHGAP17	exonic	263
chr2:190656516-190670480+	-7.76745	10.0618	7.27957	0.00697862	0.319173	down	0	0	0	60	0	28	7.09722	7.09722	7.09722	12.0654	7.09722	10.6099	chr2	190656515	190670480	+	hsa_circ_0004776	circBase	NM_000534	PMS1	exonic	438
chr2:131116440-131119905+	-7.76672	10.0612	7.27816	0.00698411	0.319173	down	0	0	0	57	0	32	7.09722	7.09722	7.09722	11.9939	7.09722	10.7867	chr2	131116439	131119905	+		novel	ENST00000489215	PTPN18	intronic	3466
chr11:2991033-2993473-	-7.69365	9.99757	7.12274	0.00761575	0.319173	down	0	0	0	53	0	32	7.09722	7.09722	7.09722	11.8925	7.09722	10.7867	chr11	2991032	2993473	-	hsa_circ_0020822	circBase	NM_005969	NAP1L4	exonic	361
chr19:9677012-9678851-	-7.67971	9.9855	7.09334	0.00774164	0.319173	down	0	0	0	53	0	31	7.09722	7.09722	7.09722	11.8925	7.09722	10.7445	chr19	9677011	9678851	-	hsa_circ_0006476	circBase	NM_001008727	ZNF121	sense overlapping	1840
chr9:111812563-111826847-	-7.66706	9.97451	7.06687	0.00785685	0.319173	down	0	0	0	50	1	33	7.09722	7.09722	7.09722	11.8116	7.61345	10.8277	chr9	111812562	111826847	-	hsa_circ_0003965	circBase	NM_032012	TMEM245	exonic	591
chr15:59323003-59323901+	-7.6599	9.96831	7.05194	0.00792255	0.319173	down	0	0	0	49	0	35	7.09722	7.09722	7.09722	11.7836	7.09722	10.9064	chr15	59323002	59323901	+	hsa_circ_0001982	circBase	NM_017610	RNF111	exonic	899
chr14:104245082-104263855-	-7.65567	9.96469	7.04299	0.00796225	0.319173	down	0	0	0	51	0	32	7.09722	7.09722	7.09722	11.8391	7.09722	10.7867	chr14	104245081	104263855	-	hsa_circ_0005791	circBase	NM_015316	PPP1R13B	exonic	345
chr7:64539002-64552330+	-7.64487	9.95528	7.02069	0.008062	0.319173	down	0	0	0	46	0	38	7.09722	7.09722	7.09722	11.6961	7.09722	11.0169	chr7	64539001	64552330	+		novel	ENST00000414799	RP11-460N20.4	sense overlapping	13329
chr15:50330965-50339661-	-7.62336	9.9369	6.97536	0.0082687	0.319173	down	0	0	0	56	0	23	7.09722	7.09722	7.09722	11.9692	7.09722	10.3534	chr15	50330964	50339661	-	hsa_circ_0035197	circBase	NM_024837	ATP8B4	exonic	275
chr15:78581961-78582917-	-7.60872	9.92431	6.94499	0.0084102	0.319173	down	0	0	0	56	0	22	7.09722	7.09722	7.09722	11.9692	7.09722	10.2961	chr15	78581960	78582917	-		novel	NM_025234	WDR61	sense overlapping	957
chr7:20406635-20431121+	-7.53777	9.86334	6.8	0.00912079	0.319173	down	0	0	0	45	1	31	7.09722	7.09722	7.09722	11.6657	7.61345	10.7445	chr7	20406634	20431121	+		novel	NM_002214	ITGB8	exonic	843
chr3:196533450-196539722+	-7.52227	9.85027	6.76802	0.0092856	0.319173	down	0	0	0	54	0	19	7.09722	7.09722	7.09722	11.9186	7.09722	10.1092	chr3	196533449	196539722	+	hsa_circ_0004950	circBase	NM_002577	PAK2	exonic	467
chr18:74728454-74766036-	-7.48901	9.82187	6.69914	0.00965106	0.319173	down	0	0	0	48	0	25	7.09722	7.09722	7.09722	11.755	7.09722	10.4615	chr18	74728453	74766036	-		novel	ENST00000580473	MBP	intronic	37583
chr11:120310838-120331466+	-7.4721	9.80746	6.65996	0.00986551	0.319173	down	0	0	0	45	0	28	7.09722	7.09722	7.09722	11.6657	7.09722	10.6099	chr11	120310837	120331466	+	hsa_circ_0024629	circBase	NM_015313	ARHGEF12	exonic	1614
chr11:94308165-94341852+	-7.46323	9.79991	6.63945	0.00997968	0.319173	down	0	0	0	43	1	29	7.09722	7.09722	7.09722	11.6029	7.61345	10.6562	chr11	94308164	94341852	+		novel	NM_152431	PIWIL4	exonic	1777
chr15:60639773-60656722-	-7.44925	9.78803	6.60729	0.0101615	0.319173	down	0	0	0	41	0	32	7.09722	7.09722	7.09722	11.5373	7.09722	10.7867	chr15	60639772	60656722	-		novel	NM_004039	ANXA2	sense overlapping	16950
chr12:88542065-88570096+	-7.44433	9.7839	6.59585	0.010227	0.319173	down	0	0	0	43	0	29	7.09722	7.09722	7.09722	11.6029	7.09722	10.6562	chr12	88542064	88570096	+	hsa_circ_0027689	circBase	NM_181783	TMTC3	exonic	1460
chr4:166959045-166999182+	-7.41616	9.76012	6.53117	0.0106054	0.319173	down	0	0	0	43	2	25	7.09722	7.09722	7.09722	11.6029	7.99285	10.4615	chr4	166959044	166999182	+		novel	NM_012464	TLL1	sense overlapping	40138
chr2:10807344-10808849-	-7.31684	9.67674	6.30694	0.0120324	0.319173	down	0	0	0	39	0	27	7.09722	7.09722	7.09722	11.4686	7.09722	10.5621	chr2	10807343	10808849	-		novel	NM_024894	NOL10	exonic	127
chr3:65958988-65978071-	-7.30598	9.66778	6.28252	0.0121992	0.319173	down	0	0	0	43	0	21	7.09722	7.09722	7.09722	11.6029	7.09722	10.2364	chr3	65958987	65978071	-		novel	ENST00000464060	MAGI1	intronic	19084
chr15:77577300-77657567-	-7.24291	9.61535	6.14361	0.0131948	0.319173	down	0	0	0	39	0	23	7.09722	7.09722	7.09722	11.4686	7.09722	10.3534	chr15	77577299	77657567	-		novel	ENST00000569159	PEAK1	exonic	266
chr6:629835-637861-	-7.23627	9.60984	6.12913	0.0133033	0.319173	down	0	0	0	38	0	24	7.09722	7.09722	7.09722	11.4329	7.09722	10.4085	chr6	629834	637861	-	hsa_circ_0075445	circBase	NM_018303	EXOC2	exonic	465
chr14:93178237-93180796-	-7.13055	9.52304	5.90196	0.0151305	0.319173	down	0	0	0	37	0	20	7.09722	7.09722	7.09722	11.3964	7.09722	10.1742	chr14	93178236	93180796	-		novel	ENST00000555169	LGMN	intronic	2560
chr3:130442258-130454846-	-7.08056	9.4823	5.79701	0.0160601	0.319173	down	0	0	0	33	0	23	7.09722	7.09722	7.09722	11.2402	7.09722	10.3534	chr3	130442257	130454846	-	hsa_circ_0121874	circBase	NM_014602	PIK3R4	exonic	1248
chr3:154006655-154013128-	-7.05264	9.45977	5.73862	0.0166025	0.319173	down	0	0	0	35	0	19	7.09722	7.09722	7.09722	11.3204	7.09722	10.1092	chr3	154006654	154013128	-	hsa_circ_0122455	circBase	NM_020865	DHX36	exonic	482
chr5:139818046-139825560+	-6.94157	9.37061	5.51062	0.0189085	0.319173	down	0	0	0	29	1	21	7.09722	7.09722	7.09722	11.065	7.61345	10.2364	chr5	139818045	139825560	+	hsa_circ_0007862	circBase	NM_017747	ANKHD1	exonic	687
chr15:62221700-62223458-	-6.94099	11.0411	7.63804	0.00571885	0.319173	down	1	0	0	110	2	79	7.57314	7.09722	7.09722	12.9188	7.99285	12.0224	chr15	62221699	62223458	-	hsa_circ_0004456	circBase	NM_017684	VPS13C	exonic	418
chr12:90049456-90049884-	-6.84214	9.29216	5.3082	0.0212328	0.319173	down	0	0	0	32	0	14	7.09722	7.09722	7.09722	11.1983	7.09722	9.73111	chr12	90049455	90049884	-	hsa_circ_0007621	circBase	ENST00000428670	ATP2B1	exonic	429
chr1:151387477-151387742-	-6.7649	9.23195	5.15014	0.0232523	0.319173	down	0	0	0	32	0	11	7.09722	7.09722	7.09722	11.1983	7.09722	9.44522	chr1	151387476	151387742	-		novel	ENST00000358476	POGZ	intronic	266
chr9:17388160-17466889+	-6.68094	9.16713	4.9669	0.025845	0.319173	down	0	0	0	26	0	16	7.09722	7.09722	7.09722	10.918	7.09722	9.8944	chr9	17388159	17466889	+		novel	NM_017738	CNTLN	exonic	1868
chr1:22078000-22084276-	-6.58516	9.09449	4.75849	0.0291626	0.319173	down	0	0	0	28	0	10	7.09722	7.09722	7.09722	11.0176	7.09722	9.33578	chr1	22077999	22084276	-	hsa_circ_0112078	circBase	NM_032236	USP48	exonic	640
chr14:101402109-101415933+	-6.31152	8.89293	4.20786	0.0402467	0.319173	down	0	0	0	1	33	0	7.09722	7.09722	7.09722	7.68703	11.0229	7.09722	chr14	101402108	101415933	+	hsa_circ_0101212	circBase	GSE61474_TCONS_00097546	GSE61474_XLOC_018852	exonic	780
chr1:93651902-93672955+	-6.28666	10.436	6.12098	0.0133647	0.319173	down	1	0	0	83	0	33	7.57314	7.09722	7.09722	12.5208	7.09722	10.8277	chr1	93651901	93672955	+		novel	NM_206886	CCDC18	exonic	906
chr11:17121407-17139218-	-6.24225	10.3958	6.02415	0.0141176	0.319173	down	1	0	0	76	0	38	7.57314	7.09722	7.09722	12.3967	7.09722	11.0169	chr11	17121406	17139218	-		novel	NM_002645	PIK3C2A	exonic	1083
chr1:155836426-155838582+	-6.09761	8.74294	3.84775	0.0498229	0.319173	down	0	0	0	17	0	11	7.09722	7.09722	7.09722	10.3581	7.09722	9.44522	chr1	155836425	155838582	+	hsa_circ_0110910	circBase	ENST00000539162	SYT11	intronic	2157
chr13:77456307-77456515-	-6.05275	10.2258	5.62021	0.0177615	0.319173	down	1	0	0	63	0	38	7.57314	7.09722	7.09722	12.1336	7.09722	11.0169	chr13	77456306	77456515	-		novel	T096390	G022607	intronic	209
chr8:101232507-101245765+	-5.95305	10.1375	5.41394	0.0199839	0.319173	down	1	0	0	62	0	31	7.57314	7.09722	7.09722	12.1113	7.09722	10.7445	chr8	101232506	101245765	+	hsa_circ_0135299	circBase	NM_003114	SPAG1	exonic	580
chrX:154645236-154649223-	-5.95175	10.3759	5.57292	0.0182474	0.319173	down	0	1	0	68	0	46	7.09722	7.81218	7.09722	12.2406	7.09722	11.2758	chrX	154645235	154649223	-	hsa_circ_0004666	circBase	GSE61474_TCONS_00349899	GSE61474_XLOC_068665	exonic	230
chr15:41373218-41379880-	-5.90917	10.0989	5.3246	0.0210339	0.319173	down	1	0	0	63	1	25	7.57314	7.09722	7.09722	12.1336	7.61345	10.4615	chr15	41373217	41379880	-	hsa_circ_0007993	circBase	NM_017553	INO80	exonic	390
chrX:134679348-134686071+	-5.90636	10.0962	5.31944	0.0210963	0.319173	down	1	0	0	51	1	41	7.57314	7.09722	7.09722	11.8391	7.61345	11.1195	chrX	134679347	134686071	+	hsa_circ_0139798	circBase	NM_182540	DDX26B	exonic	870
chr10:131964771-131967754+	-5.89366	10.0852	5.29341	0.0214138	0.319173	down	1	0	0	60	0	29	7.57314	7.09722	7.09722	12.0654	7.09722	10.6562	chr10	131964770	131967754	+	hsa_circ_0093110	circBase	NM_006541	GLRX3	exonic	293
chr11:93429486-93433352+	-5.86953	10.064	5.24527	0.0220142	0.319173	down	1	0	0	51	2	37	7.57314	7.09722	7.09722	11.8391	7.99285	10.981	chr11	93429485	93433352	+	hsa_circ_0096775	circBase	NM_033395	CEP295	exonic	3603
chr13:31204972-31205611+	-5.86527	10.2998	5.39346	0.0202197	0.319173	down	0	1	0	69	4	32	7.09722	7.81218	7.09722	12.2611	8.54127	10.7867	chr13	31204971	31205611	+	hsa_circ_0005874	circBase	NM_005800	USPL1	exonic	640
chr2:60998654-61007914+	-5.7449	9.95559	4.99919	0.0253673	0.319173	down	1	0	0	54	1	25	7.57314	7.09722	7.09722	11.9186	7.61345	10.4615	chr2	60998653	61007914	+	hsa_circ_0120517	circBase	NM_022894	PAPOLG	exonic	414
chr20:17928130-17937681-	-5.62574	10.3557	5.01427	0.0251473	0.319173	down	0	0	1	72	1	36	7.09722	7.09722	8.18458	12.3208	7.61345	10.9441	chr20	17928129	17937681	-	hsa_circ_0001977	circBase	NM_014426	SNX5	exonic	1027
chr15:49319562-49327855-	-5.60911	10.3415	4.98149	0.0256281	0.319173	down	0	0	1	71	0	37	7.09722	7.09722	8.18458	12.3011	7.09722	10.981	chr15	49319561	49327855	-		novel	NM_014701	SECISBP2L	exonic	832
chr1:213251038-213303232+	-5.60657	9.83681	4.73545	0.0295557	0.319173	down	1	0	0	51	0	21	7.57314	7.09722	7.09722	11.8391	7.09722	10.2364	chr1	213251037	213303232	+	hsa_circ_0005841	circBase	NM_012424	RPS6KC1	exonic	694
chr3:144219473-144220261+	-5.5762	10.049	4.81884	0.0281587	0.319173	down	0	1	0	52	0	36	7.09722	7.81218	7.09722	11.8661	7.09722	10.9441	chr3	144219472	144220261	+		novel			intergenic	789
chrX:117892018-117910474+	-5.54047	10.0184	4.75073	0.0292944	0.319173	down	0	1	0	47	1	39	7.09722	7.81218	7.09722	11.7258	7.61345	11.0519	chrX	117892017	117910474	+	hsa_circ_0091399	circBase	NM_001560	IL13RA1	exonic	703
chr6:42600290-42604932+	-5.52167	10.0026	4.71463	0.0299156	0.319173	down	0	1	0	55	0	28	7.09722	7.81218	7.09722	11.9441	7.09722	10.6099	chr6	42600289	42604932	+	hsa_circ_0076373	circBase	NM_015255	UBR2	exonic	577
chr2:61014082-61020850+	-5.50908	10.2563	4.78668	0.0286892	0.319173	down	0	0	1	60	1	42	7.09722	7.09722	8.18458	12.0654	7.61345	11.1521	chr2	61014081	61020850	+	hsa_circ_0120522	circBase	NM_022894	PAPOLG	exonic	602
chr11:108029647-108059928-	-5.48248	9.96926	4.64081	0.0312291	0.319173	down	0	1	0	52	2	27	7.09722	7.81218	7.09722	11.8661	7.99285	10.5621	chr11	108029646	108059928	-		novel	NM_002519	NPAT	sense overlapping	30282
chr10:102703783-102710510+	-5.48126	9.72998	4.47458	0.0344118	0.319173	down	1	0	0	43	1	23	7.57314	7.09722	7.09722	11.6029	7.61345	10.3534	chr10	102703782	102710510	+	hsa_circ_0092408	circBase	NM_018121	SLF2	exonic	676
chr7:87837822-87840240-	-5.4667	9.71768	4.44441	0.0350248	0.319173	down	1	0	0	43	2	21	7.57314	7.09722	7.09722	11.6029	7.99285	10.2364	chr7	87837821	87840240	-		novel	NM_003130	SRI	exonic	365
chr4:144449021-144451679+	-5.46032	10.2152	4.69292	0.0302958	0.319173	down	0	0	1	66	0	31	7.09722	7.09722	8.18458	12.1988	7.09722	10.7445	chr4	144449020	144451679	+	hsa_circ_0125428	circBase	NM_003601	SMARCA5	exonic	357
chr2:9028148-9098771-	-5.44869	9.94067	4.57773	0.032399	0.319173	down	0	1	0	52	0	27	7.09722	7.81218	7.09722	11.8661	7.09722	10.5621	chr2	9028147	9098771	-	hsa_circ_0008847	circBase	NM_138799	MBOAT2	exonic	376
chr12:105536231-105558085+	-5.44203	10.3408	5.04104	0.0247616	0.319173	down	2	0	0	70	1	38	7.93041	7.09722	7.09722	12.2812	7.61345	11.0169	chr12	105536230	105558085	+		novel	NM_015275	KIAA1033	exonic	1567
chr3:17052397-17056403+	-5.38367	9.8859	4.45798	0.0347477	0.319173	down	0	1	0	47	3	26	7.09722	7.81218	7.09722	11.7258	8.29296	10.5127	chr3	17052396	17056403	+		novel	NM_015184	PLCL2	sense overlapping	4007
chr4:36115792-36122948-	-5.36652	10.1365	4.51609	0.0335866	0.319173	down	0	0	1	62	0	29	7.09722	7.09722	8.18458	12.1113	7.09722	10.6562	chr4	36115791	36122948	-		novel	NM_015230	ARAP2	exonic	410
chr10:27301811-27303640-	-5.15723	9.69858	4.02049	0.0449605	0.319173	down	0	1	0	44	0	20	7.09722	7.81218	7.09722	11.6346	7.09722	10.1742	chr10	27301810	27303640	-	hsa_circ_0018007	circBase	NM_014915	ANKRD26	exonic	447
chr5:130791494-130797781-	-5.13847	9.94813	4.10336	0.0428079	0.319173	down	0	0	1	53	0	25	7.09722	7.09722	8.18458	11.8925	7.09722	10.4615	chr5	130791493	130797781	-	hsa_circ_0127884	circBase	NM_016340	RAPGEF6	exonic	596
chr11:70176279-70181800+	-4.90453	9.87189	4.01068	0.0452227	0.319173	down	2	0	0	47	0	28	7.93041	7.09722	7.09722	11.7258	7.09722	10.6099	chr11	70176278	70181800	+	hsa_circ_0096344	circBase	NM_003626	PPFIA1	exonic	498
chr18:48444480-48458730+	-4.75872	10.4777	4.1896	0.0406823	0.319173	down	2	0	1	67	22	30	7.93041	7.09722	8.18458	12.2198	10.4847	10.701	chr18	48444479	48458730	+	hsa_circ_0047700	circBase	NM_002396	ME2	exonic	787
chr5:130590788-130591885+	-4.73802	10.2731	3.9571	0.046684	0.319173	down	0	1	1	66	0	35	7.09722	7.81218	8.18458	12.1988	7.09722	10.9064	chr5	130590787	130591885	+		novel	ENST00000511432	CDC42SE2	intronic	1098
chr11:18312989-18314523-	-4.71093	10.4362	4.09898	0.042919	0.319173	down	2	0	1	71	8	36	7.93041	7.09722	8.18458	12.3011	9.24832	10.9441	chr11	18312988	18314523	-	hsa_circ_0000280	circBase	NM_007216	HPS5	exonic	656
chr15:76566753-76589689-	-4.6724	10.0817	3.90425	0.0481742	0.319173	down	3	0	0	56	0	32	8.21653	7.09722	7.09722	11.9692	7.09722	10.7867	chr15	76566752	76589689	-	hsa_circ_0104575	circBase	NM_000126	ETFA	sense overlapping	22937
