# Supplementary material for: Circular RNA profiles of osteoarthritic synovium
Source: Royal Society of Chemistry journal article supplement (doi:10.1039/d2mo00066k), 2022-03-31
Supplement: d2mo00066k7.xlsx [file d2mo00066k7.xlsx]

## Sheet: up.Patient_vs_Control
Patient vs Control.up Fold Change: 1.5 p-value: 0.05 FPKM >= 0.1 in at least one group Column A: gene, the gene name. Column B: gene_id, the Ensembl gene identifier. Column C: biotype, protein_coding. Column D: strand, transcription direction. Column E: locus, genomic locus. chromosome: start-end. Column F ~ G, FPKM value of each group. Column H: fold change, fold change between two groups (inf: …
Patient vs Control up-regulated genes
gene	gene_id	biotype	strand	locus	Patient_FPKM	Control_FPKM	Fold change	log2(fold change)	p_value	FDR	Regulation	GeneID	Synonyms	dbXrefs	chromosome	map_location	description	pathway	GO-CC	GO-MF	GO-BP
STPG1	ENSG00000001460	protein_coding	-	chr1:24634045-24799466	3.80513	0.871829	4.36454	2.12583	0.0247	0.298352	up	90529	C1orf201|MAPO2	MIM:615826|HGNC:HGNC:28070|Ensembl:ENSG00000001460|HPRD:14273|Vega:OTTHUMG00000003297	1	1p36.11	sperm-tail PG-rich repeat containing 1		GO:0005634(nucleus)//GO:0005737(cytoplasm)		GO:0006915(apoptotic process)
BAD	ENSG00000002330	protein_coding	-	chr11:64037301-64056972	3.99515	0.709685	5.62947	2.493	0.0397	0.371244	up	572	BBC2|BCL2L8	MIM:603167|HGNC:HGNC:936|Ensembl:ENSG00000002330|HPRD:04409|Vega:OTTHUMG00000134302	11	11q13.1	BCL2 associated agonist of cell death	hsa04012(ErbB signaling pathway)//hsa04014(Ras signaling pathway)//hsa04022(cGMP-PKG signaling pathway)//hsa04024(cAMP signaling pathway)//hsa04151(PI3K-Akt signaling pathway)//hsa04210(Apoptosis)//hsa04370(VEGF signaling pathway)//hsa04510(Focal adhesion)//hsa04722(Neurotrophin signaling pathway)//hsa04910(Insulin signaling pathway)//hsa04919(Thyroid hormone signaling pathway)//hsa05010(Alzheime…	GO:0005739(mitochondrion)//GO:0005741(mitochondrial outer membrane)//GO:0005829(cytosol)	GO:0019901(protein kinase binding)//GO:0005515(protein binding)//GO:0046982(protein heterodimerization activity)//GO:0008289(lipid binding)//GO:0043422(protein kinase B binding)//GO:0030346(protein phosphatase 2B binding)//GO:0008656(cysteine-type endopeptidase activator activity involved in apoptotic process)//GO:0005543(phospholipid binding)//GO:0071889(14-3-3 protein binding)	GO:0071396(cellular response to lipid)//GO:0045862(positive regulation of proteolysis)//GO:0021987(cerebral cortex development)//GO:0032024(positive regulation of insulin secretion)//GO:0042593(glucose homeostasis)//GO:0097192(extrinsic apoptotic signaling pathway in absence of ligand)//GO:2000078(positive regulation of type B pancreatic cell development)//GO:0007283(spermatogenesis)//GO:0045579(…
MAD1L1	ENSG00000002822	protein_coding	-	chr7:1855428-2272878	7.28686	1.99603	3.65069	1.86817	0.00995	0.186428	up	8379	MAD1|PIG9|TP53I9|TXBP181	MIM:602686|HGNC:HGNC:6762|Ensembl:ENSG00000002822|HPRD:04065|Vega:OTTHUMG00000151493	7	7p22	MAD1 mitotic arrest deficient-like 1 (yeast)	hsa04110(Cell cycle)//hsa04914(Progesterone-mediated oocyte maturation)//hsa05203(Viral carcinogenesis)	GO:0015629(actin cytoskeleton)//GO:0072686(mitotic spindle)//GO:0000776(kinetochore)//GO:0005829(cytosol)//GO:0005813(centrosome)//GO:0005819(spindle)//GO:0000777(condensed chromosome kinetochore)//GO:0005643(nuclear pore)//GO:0005634(nucleus)//GO:0005737(cytoplasm)//GO:0000922(spindle pole)	GO:0005515(protein binding)	GO:0048538(thymus development)//GO:0007067(mitotic nuclear division)//GO:0090235(regulation of metaphase plate congression)//GO:0051301(cell division)//GO:0000278(mitotic cell cycle)//GO:0007264(small GTPase mediated signal transduction)//GO:0007094(mitotic spindle assembly checkpoint)//GO:0042130(negative regulation of T cell proliferation)//GO:0007093(mitotic cell cycle checkpoint)
CYP26B1	ENSG00000003137	protein_coding	-	chr2:72356366-72375167	5.07958	2.48606	2.04323	1.03085	0.04735	0.395316	up	56603	CYP26A2|P450RAI-2|P450RAI2|RHFCA	MIM:605207|HGNC:HGNC:20581|Ensembl:ENSG00000003137|HPRD:05550|Vega:OTTHUMG00000129756	2	2p13.2	cytochrome P450 family 26 subfamily B member 1	hsa00830(Retinol metabolism)//	GO:0005789(endoplasmic reticulum membrane)//GO:0005737(cytoplasm)	GO:0004497(monooxygenase activity)//GO:0001972(retinoic acid binding)//GO:0016705(oxidoreductase activity, acting on paired donors, with incorporation or reduction of molecular oxygen)//GO:0020037(heme binding)//GO:0008401(retinoic acid 4-hydroxylase activity)//GO:0005506(iron ion binding)	GO:0055114(oxidation-reduction process)//GO:0007140(male meiosis)//GO:0009954(proximal/distal pattern formation)//GO:0030326(embryonic limb morphogenesis)//GO:0001709(cell fate determination)//GO:0034653(retinoic acid catabolic process)//GO:0048387(negative regulation of retinoic acid receptor signaling pathway)//GO:0007283(spermatogenesis)//GO:0060349(bone morphogenesis)//GO:0044281(small molecu…
SARM1	ENSG00000004139	protein_coding	+	chr17:26684603-26734215	4.78934	1.37523	3.48256	1.80015	0.04045	0.373183	up	23098	MyD88-5|SAMD2|SARM	MIM:607732|HGNC:HGNC:17074|Ensembl:ENSG00000004139	17	17q11	sterile alpha and TIR motif containing 1		GO:0005874(microtubule)//GO:0030425(dendrite)//GO:0030424(axon)//GO:0005829(cytosol)//GO:0045202(synapse)//GO:0005739(mitochondrion)//GO:0030054(cell junction)//GO:0031315(extrinsic component of mitochondrial outer membrane)//GO:0005737(cytoplasm)		GO:0034138(toll-like receptor 3 signaling pathway)//GO:0045087(innate immune response)//GO:0009749(response to glucose)//GO:0034142(toll-like receptor 4 signaling pathway)//GO:1901214(regulation of neuron death)//GO:0048814(regulation of dendrite morphogenesis)//GO:0002756(MyD88-independent toll-like receptor signaling pathway)//GO:0002224(toll-like receptor signaling pathway)//GO:0042981(regulat…
CAMKK1	ENSG00000004660	protein_coding	-	chr17:3763608-3798185	2.25214	0.820503	2.74482	1.45671	0.04605	0.39068	up	84254	CAMKKA	MIM:611411|HGNC:HGNC:1469|Ensembl:ENSG00000004660|HPRD:13000|Vega:OTTHUMG00000090725	17	17p13.2	calcium/calmodulin-dependent protein kinase kinase 1, alpha	hsa04152(AMPK signaling pathway)//	GO:0005634(nucleus)//GO:0005829(cytosol)	GO:0005524(ATP binding)//GO:0005515(protein binding)//GO:0005516(calmodulin binding)//GO:0004674(protein serine/threonine kinase activity)//GO:0004683(calmodulin-dependent protein kinase activity)	GO:0006468(protein phosphorylation)//GO:0007268(synaptic transmission)//GO:0032147(activation of protein kinase activity)
ARHGAP33	ENSG00000004777	protein_coding	+	chr19:36265433-36279724	1.41471	0.113786	12.4331	3.63611	0.05	0.405579	up	115703	NOMA-GAP|SNX26|TCGAP	MIM:614902|HGNC:HGNC:23085|Ensembl:ENSG00000004777|HPRD:15415|Vega:OTTHUMG00000182071	19	19q13.12	Rho GTPase activating protein 33		GO:0005886(plasma membrane)//GO:0005829(cytosol)	GO:0035091(phosphatidylinositol binding)//GO:0005515(protein binding)//GO:0005096(GTPase activator activity)	GO:0051056(regulation of small GTPase mediated signal transduction)//GO:0043547(positive regulation of GTPase activity)//GO:0015031(protein transport)//GO:0007264(small GTPase mediated signal transduction)//GO:0007165(signal transduction)
UPF1	ENSG00000005007	protein_coding	+	chr19:18942746-18979045	15.7316	4.05457	3.87996	1.95604	0.00015	0.0134799	up	5976	HUPF1|NORF1|RENT1|pNORF1|smg-2	MIM:601430|HGNC:HGNC:9962|Ensembl:ENSG00000005007|HPRD:03254|Vega:OTTHUMG00000183025	19	19p13.11	UPF1 regulator of nonsense transcripts homolog (yeast)	hsa03013(RNA transport)//hsa03015(mRNA surveillance pathway)	GO:0035145(exon-exon junction complex)//GO:0000932(cytoplasmic mRNA processing body)//GO:0005829(cytosol)//GO:0000784(nuclear chromosome, telomeric region)//GO:0044530(supraspliceosomal complex)//GO:0000785(chromatin)//GO:0005654(nucleoplasm)//GO:0005634(nucleus)//GO:0005737(cytoplasm)	GO:0008270(zinc ion binding)//GO:0005524(ATP binding)//GO:0003723(RNA binding)//GO:0003682(chromatin binding)//GO:0004386(helicase activity)//GO:0042162(telomeric DNA binding)//GO:0044822(poly(A) RNA binding)//GO:0005515(protein binding)//GO:0004004(ATP-dependent RNA helicase activity)	GO:0006406(mRNA export from nucleus)//GO:0000723(telomere maintenance)//GO:0000184(nuclear-transcribed mRNA catabolic process, nonsense-mediated decay)//GO:0061158(3'-UTR-mediated mRNA destabilization)//GO:0000956(nuclear-transcribed mRNA catabolic process)//GO:0061014(positive regulation of mRNA catabolic process)//GO:0010467(gene expression)//GO:0009048(dosage compensation by inactivation of X …
MEOX1	ENSG00000005102	protein_coding	-	chr17:41717755-41739322	6.73105	1.51906	4.43105	2.14765	0.0178	0.25165	up	4222	KFS2|MOX1	MIM:600147|HGNC:HGNC:7013|Ensembl:ENSG00000005102|HPRD:02537|Vega:OTTHUMG00000170513	17	17q21	mesenchyme homeobox 1		GO:0005634(nucleus)//GO:0005737(cytoplasm)	GO:0003674(molecular_function)//GO:0003682(chromatin binding)//GO:0003700(transcription factor activity, sequence-specific DNA binding)//GO:0043565(sequence-specific DNA binding)//GO:0000978(RNA polymerase II core promoter proximal region sequence-specific DNA binding)//GO:0071837(HMG box domain binding)//GO:0001077(transcriptional activator activity, RNA polymerase II core promoter proximal regi…	GO:0061056(sclerotome development)//GO:0001757(somite specification)//GO:0061053(somite development)//GO:0060218(hematopoietic stem cell differentiation)//GO:0006366(transcription from RNA polymerase II promoter)//GO:0007275(multicellular organism development)//GO:0045944(positive regulation of transcription from RNA polymerase II promoter)//GO:0008150(biological_process)
LIG3	ENSG00000005156	protein_coding	+	chr17:33254877-33332083	11.5723	4.81056	2.40561	1.2664	0.0418	0.37721	up	3980	LIG2	MIM:600940|HGNC:HGNC:6600|Ensembl:ENSG00000005156|HPRD:02966|Vega:OTTHUMG00000128519	17	17q11.2-q12	ligase III, DNA, ATP-dependent	hsa03410(Base excision repair)	GO:0005654(nucleoplasm)//GO:0000795(synaptonemal complex)//GO:0005634(nucleus)//GO:0005739(mitochondrion)//GO:0070421(DNA ligase III-XRCC1 complex)	GO:0008270(zinc ion binding)//GO:0005524(ATP binding)//GO:0003909(DNA ligase activity)//GO:0003910(DNA ligase (ATP) activity)//GO:0005515(protein binding)//GO:0003677(DNA binding)	GO:0097681(double-strand break repair via alternative nonhomologous end joining)//GO:0006303(double-strand break repair via nonhomologous end joining)//GO:0006273(lagging strand elongation)//GO:0051103(DNA ligation involved in DNA repair)//GO:0033151(V(D)J recombination)//GO:0006288(base-excision repair, DNA ligation)//GO:0070911(global genome nucleotide-excision repair)//GO:0006310(DNA recombina…
AC004381.6	ENSG00000005189	protein_coding	+	chr16:20621564-20936331	2.94412	0.586493	5.01987	2.32765	0.03055	0.328172	up
FAM214B	ENSG00000005238	protein_coding	-	chr9:35104108-35116338	6.4053	2.3601	2.714	1.44042	0.03605	0.355163	up	80256	KIAA1539	HGNC:HGNC:25666|Ensembl:ENSG00000005238|HPRD:13869|Vega:OTTHUMG00000019847	9	9p13.3	family with sequence similarity 214 member B		GO:0005634(nucleus)	GO:0005515(protein binding)
PRKAR2B	ENSG00000005249	protein_coding	+	chr7:106685093-106802256	70.2635	33.4419	2.10106	1.07112	0.0473	0.395239	up	5577	PRKAR2|RII-BETA	MIM:176912|HGNC:HGNC:9392|Ensembl:ENSG00000005249|HPRD:01486|Vega:OTTHUMG00000137418	7	7q22	protein kinase cAMP-dependent type II regulatory subunit beta	hsa04910(Insulin signaling pathway)	GO:0005743(mitochondrial inner membrane)//GO:0070062(extracellular exosome)//GO:0048471(perinuclear region of cytoplasm)//GO:0005886(plasma membrane)//GO:0005829(cytosol)//GO:0005952(cAMP-dependent protein kinase complex)//GO:0005813(centrosome)//GO:0045121(membrane raft)//GO:0097546(ciliary base)//GO:0043198(dendritic shaft)//GO:0043197(dendritic spine)//GO:0005737(cytoplasm)//GO:0043025(neurona…	GO:0004862(cAMP-dependent protein kinase inhibitor activity)//GO:0008603(cAMP-dependent protein kinase regulator activity)//GO:0019904(protein domain specific binding)//GO:0030552(cAMP binding)//GO:0034236(protein kinase A catalytic subunit binding)//GO:0031625(ubiquitin protein ligase binding)	GO:0097332(response to antipsychotic drug)//GO:2000480(negative regulation of cAMP-dependent protein kinase activity)//GO:0034199(activation of protein kinase A activity)//GO:0006112(energy reserve metabolic process)//GO:0000086(G2/M transition of mitotic cell cycle)//GO:0097338(response to clozapine)//GO:0055085(transmembrane transport)//GO:0050796(regulation of insulin secretion)//GO:0007596(bl…
C19orf60	ENSG00000006015	protein_coding	+	chr19:18682539-18731849	3.48574	0.250899	13.8929	3.79628	0.00945	0.181978	up	55049	-	HGNC:HGNC:26098|Ensembl:ENSG00000006015|HPRD:07948|Vega:OTTHUMG00000183112	19	19p13.11	chromosome 19 open reading frame 60			GO:0005515(protein binding)
OSBPL7	ENSG00000006025	protein_coding	-	chr17:45884737-45899200	2.90842	0.821827	3.53897	1.82333	0.03885	0.367862	up	114881	ORP7	MIM:606735|HGNC:HGNC:16387|Ensembl:ENSG00000006025|HPRD:09477|Vega:OTTHUMG00000178288	17	17q21	oxysterol binding protein like 7		GO:0005776(autophagosome)//GO:0005886(plasma membrane)//GO:0005789(endoplasmic reticulum membrane)//GO:0097038(perinuclear endoplasmic reticulum)//GO:0005829(cytosol)	GO:0015485(cholesterol binding)//GO:0005515(protein binding)	GO:0006869(lipid transport)//GO:0071397(cellular response to cholesterol)//GO:1901800(positive regulation of proteasomal protein catabolic process)
TMEM132A	ENSG00000006118	protein_coding	+	chr11:60680637-60720002	1.31937	0.331471	3.98036	1.9929	0.00875	0.17528	up	54972	GBP|HSPA5BP1	HGNC:HGNC:31092|Ensembl:ENSG00000006118|HPRD:11034|Vega:OTTHUMG00000167803	11	11q12.2	transmembrane protein 132A		GO:0016021(integral component of membrane)//GO:0070062(extracellular exosome)//GO:0005789(endoplasmic reticulum membrane)//GO:0000139(Golgi membrane)	GO:0003674(molecular_function)	GO:0008150(biological_process)
SCIN	ENSG00000006747	protein_coding	+	chr7:12609750-12693228	11.5383	4.91673	2.34676	1.23067	0.01215	0.20688	up	85477	-	MIM:613416|HGNC:HGNC:21695|Ensembl:ENSG00000006747|HPRD:11539|Vega:OTTHUMG00000152385	7	7p21.3	scinderin	hsa04666(Fc gamma R-mediated phagocytosis)//hsa04810(Regulation of actin cytoskeleton)//hsa05203(Viral carcinogenesis)	GO:0005938(cell cortex)//GO:0005903(brush border)//GO:0070062(extracellular exosome)//GO:0005856(cytoskeleton)//GO:0005737(cytoplasm)	GO:0005546(phosphatidylinositol-4,5-bisphosphate binding)//GO:0005545(1-phosphatidylinositol binding)//GO:0001786(phosphatidylserine binding)//GO:0051015(actin filament binding)//GO:0003779(actin binding)//GO:0005509(calcium ion binding)	GO:0051014(actin filament severing)//GO:0045654(positive regulation of megakaryocyte differentiation)//GO:0043065(positive regulation of apoptotic process)//GO:0042989(sequestering of actin monomers)//GO:0051693(actin filament capping)//GO:0051047(positive regulation of secretion)//GO:0008285(negative regulation of cell proliferation)//GO:0017156(calcium ion regulated exocytosis)//GO:0032330(regu…
RPUSD1	ENSG00000007376	protein_coding	-	chr16:834973-850737	1.76373	0.204807	8.61171	3.1063	0.00135	0.0613697	up	113000	C16orf40|RLUCL	HGNC:HGNC:14173|Ensembl:ENSG00000007376|HPRD:08507|Vega:OTTHUMG00000047840	16	16p13.3	RNA pseudouridylate synthase domain containing 1		GO:0005739(mitochondrion)//GO:0005575(cellular_component)	GO:0003723(RNA binding)//GO:0009982(pseudouridine synthase activity)//GO:0003674(molecular_function)//GO:0019239(deaminase activity)	GO:0001522(pseudouridine synthesis)//GO:0031119(tRNA pseudouridine synthesis)//GO:0008150(biological_process)
RHBDF1	ENSG00000007384	protein_coding	-	chr16:108057-126354	7.37652	1.46186	5.046	2.33514	0.00985	0.185449	up	64285	C16orf8|Dist1|EGFR-RS|gene-89|gene-90|hDist1	MIM:614403|HGNC:HGNC:20561|Ensembl:ENSG00000007384|HPRD:07027|Vega:OTTHUMG00000060719	16	16p13.3	rhomboid 5 homolog 1 (Drosophila)		GO:0016021(integral component of membrane)//GO:0005789(endoplasmic reticulum membrane)//GO:0000139(Golgi membrane)	GO:0004252(serine-type endopeptidase activity)//GO:0019838(growth factor binding)	GO:0061136(regulation of proteasomal protein catabolic process)//GO:0050708(regulation of protein secretion)//GO:0008283(cell proliferation)//GO:0016477(cell migration)//GO:0050709(negative regulation of protein secretion)//GO:0016485(protein processing)//GO:0006508(proteolysis)//GO:0042058(regulation of epidermal growth factor receptor signaling pathway)//GO:0015031(protein transport)
PIGQ	ENSG00000007541	protein_coding	+	chr16:616994-634136	2.29311	0.66028	3.47295	1.79616	0.00835	0.170075	up	9091	GPI1|c407A10.1	MIM:605754|HGNC:HGNC:14135|Ensembl:ENSG00000007541|HPRD:09307|Vega:OTTHUMG00000168047	16	16p13.3	phosphatidylinositol glycan anchor biosynthesis class Q	hsa00563(Glycosylphosphatidylinositol(GPI)-anchor biosynthesis)//	GO:0005789(endoplasmic reticulum membrane)//GO:0016021(integral component of membrane)//GO:0000506(glycosylphosphatidylinositol-N-acetylglucosaminyltransferase (GPI-GnT) complex)	GO:0017176(phosphatidylinositol N-acetylglucosaminyltransferase activity)	GO:0044267(cellular protein metabolic process)//GO:0016254(preassembly of GPI anchor in ER membrane)//GO:0006506(GPI anchor biosynthetic process)//GO:0005975(carbohydrate metabolic process)//GO:0006501(C-terminal protein lipidation)//GO:0043687(post-translational protein modification)
DNAJC11	ENSG00000007923	protein_coding	-	chr1:6684925-6761984	12.6339	4.1358	3.05476	1.61106	0.01735	0.247998	up	55735	dJ126A5.1	MIM:614827|HGNC:HGNC:25570|Ensembl:ENSG00000007923|HPRD:07112|Vega:OTTHUMG00000001443	1	1p36.31	DnaJ heat shock protein family (Hsp40) member C11		GO:0005743(mitochondrial inner membrane)//GO:0005739(mitochondrion)//GO:0070062(extracellular exosome)	GO:0005515(protein binding)
MYLIP	ENSG00000007944	protein_coding	+	chr6:16129355-16148479	28.5951	14.6057	1.9578	0.969234	0.0271	0.312374	up	29116	IDOL|MIR	MIM:610082|HGNC:HGNC:21155|Ensembl:ENSG00000007944|HPRD:17621|Vega:OTTHUMG00000016405	6	6p22.3	myosin regulatory light chain interacting protein		GO:0005622(intracellular)//GO:0005886(plasma membrane)//GO:0005856(cytoskeleton)//GO:0005737(cytoplasm)//GO:0019898(extrinsic component of membrane)	GO:0008270(zinc ion binding)//GO:0004842(ubiquitin-protein transferase activity)//GO:0061630(ubiquitin protein ligase activity)//GO:0008092(cytoskeletal protein binding)//GO:0016874(ligase activity)//GO:0005515(protein binding)	GO:0045732(positive regulation of protein catabolic process)//GO:0032803(regulation of low-density lipoprotein particle receptor catabolic process)//GO:0016567(protein ubiquitination)//GO:0010989(negative regulation of low-density lipoprotein particle clearance)//GO:0042632(cholesterol homeostasis)//GO:0042787(protein ubiquitination involved in ubiquitin-dependent protein catabolic process)//GO:0…
CDK11A	ENSG00000008128	protein_coding	-	chr1:1634168-1677431	19.7213	4.32947	4.55512	2.18749	0.0085	0.171868	up	728642	CDC2L2|CDC2L3|CDK11-p110|CDK11-p46|CDK11-p58|PITSLRE|p58GTA	MIM:116951|HGNC:HGNC:1730|Ensembl:ENSG00000008128|Vega:OTTHUMG00000000703	1	1p36.33	cyclin-dependent kinase 11A		GO:0005634(nucleus)//GO:0005737(cytoplasm)	GO:0004672(protein kinase activity)//GO:0005524(ATP binding)//GO:0004693(cyclin-dependent protein serine/threonine kinase activity)//GO:0004674(protein serine/threonine kinase activity)	GO:0050684(regulation of mRNA processing)//GO:0007067(mitotic nuclear division)//GO:0006468(protein phosphorylation)//GO:0051726(regulation of cell cycle)//GO:0001558(regulation of cell growth)//GO:0006915(apoptotic process)//GO:0006355(regulation of transcription, DNA-templated)
DLEC1	ENSG00000008226	protein_coding	+	chr3:38080695-38178733	2.13826	0.291101	7.34545	2.87685	0.00825	0.169282	up	9940	CFAP81|DLC1|F56	MIM:604050|HGNC:HGNC:2899|Ensembl:ENSG00000008226|HPRD:07234|Vega:OTTHUMG00000131085	3	3p21.3	deleted in lung and esophageal cancer 1		GO:0005737(cytoplasm)	GO:0003674(molecular_function)	GO:0008285(negative regulation of cell proliferation)
AASS	ENSG00000008311	protein_coding	-	chr7:121715700-121784334	20.741	10.8003	1.92041	0.941414	0.0231	0.288356	up	10157	LKR/SDH|LKRSDH|LORSDH	MIM:605113|HGNC:HGNC:17366|Ensembl:ENSG00000008311|HPRD:05489|Vega:OTTHUMG00000157058	7	7q31.3	aminoadipate-semialdehyde synthase	hsa00310(Lysine degradation)//	GO:0043231(intracellular membrane-bounded organelle)//GO:0005739(mitochondrion)//GO:0005759(mitochondrial matrix)	GO:0016491(oxidoreductase activity)//GO:0047130(saccharopine dehydrogenase (NADP+, L-lysine-forming) activity)//GO:0047131(saccharopine dehydrogenase (NAD+, L-glutamate-forming) activity)	GO:0055114(oxidation-reduction process)//GO:0044281(small molecule metabolic process)//GO:0033512(L-lysine catabolic process to acetyl-CoA via saccharopine)//GO:0051262(protein tetramerization)//GO:0006554(lysine catabolic process)//GO:0034641(cellular nitrogen compound metabolic process)
NFIX	ENSG00000008441	protein_coding	+	chr19:13106421-13209610	31.9475	10.2206	3.12579	1.64422	0.00375	0.109791	up	4784	MRSHSS|NF1A|SOTOS2	MIM:164005|HGNC:HGNC:7788|Ensembl:ENSG00000008441|HPRD:01234|Vega:OTTHUMG00000180726	19	19p13.3	nuclear factor I/X (CCAAT-binding transcription factor)		GO:0005634(nucleus)	GO:0005515(protein binding)//GO:0003705(transcription factor activity, RNA polymerase II distal enhancer sequence-specific binding)//GO:0003677(DNA binding)//GO:0003700(transcription factor activity, sequence-specific DNA binding)	GO:0048708(astrocyte differentiation)//GO:0021680(cerebellar Purkinje cell layer development)//GO:0021707(cerebellar granule cell differentiation)//GO:0006351(transcription, DNA-templated)//GO:0006366(transcription from RNA polymerase II promoter)//GO:0045944(positive regulation of transcription from RNA polymerase II promoter)//GO:0000122(negative regulation of transcription from RNA polymerase …
IL32	ENSG00000008517	protein_coding	+	chr16:3115297-3137101	23.5041	8.05137	2.91925	1.5456	0.04735	0.395316	up	9235	IL-32alpha|IL-32beta|IL-32delta|IL-32gamma|NK4|TAIF|TAIFa|TAIFb|TAIFc|TAIFd	MIM:606001|HGNC:HGNC:16830|Ensembl:ENSG00000008517|HPRD:09346|Vega:OTTHUMG00000167498	16	16p13.3	interleukin 32		GO:0016020(membrane)//GO:0005615(extracellular space)	GO:0005515(protein binding)//GO:0005125(cytokine activity)	GO:0006952(defense response)//GO:0006955(immune response)//GO:0007155(cell adhesion)
PKD1	ENSG00000008710	protein_coding	-	chr16:2089815-2185899	16.3826	4.19797	3.9025	1.9644	0.0019	0.0762002	up	5310	PBP|Pc-1|TRPP1	MIM:601313|HGNC:HGNC:9008|Ensembl:ENSG00000008710|HPRD:03203|Vega:OTTHUMG00000155795	16	16p13.3	polycystin 1, transient receptor potential channel interacting		GO:0016323(basolateral plasma membrane)//GO:0016021(integral component of membrane)//GO:0005887(integral component of plasma membrane)//GO:0016328(lateral plasma membrane)//GO:0009986(cell surface)//GO:0060170(ciliary membrane)//GO:0005886(plasma membrane)//GO:0030660(Golgi-associated vesicle membrane)//GO:0005829(cytosol)//GO:0002133(polycystin complex)//GO:0005929(cilium)//GO:0000139(Golgi memb…	GO:0019904(protein domain specific binding)//GO:0019901(protein kinase binding)//GO:0044325(ion channel binding)//GO:0030246(carbohydrate binding)//GO:0005262(calcium channel activity)//GO:0005515(protein binding)	GO:0060674(placenta blood vessel development)//GO:0021915(neural tube development)//GO:0009653(anatomical structure morphogenesis)//GO:0001502(cartilage condensation)//GO:0007204(positive regulation of cytosolic calcium ion concentration)//GO:0072237(metanephric proximal tubule development)//GO:0048754(branching morphogenesis of an epithelial tube)//GO:0060428(lung epithelium development)//GO:003…
TRAF3IP3	ENSG00000009790	protein_coding	+	chr1:209929376-209957904	19.1388	7.46212	2.56479	1.35884	0.0364	0.356439	up	80342	T3JAM	MIM:608255|HGNC:HGNC:30766|Ensembl:ENSG00000009790|HPRD:16305|Vega:OTTHUMG00000036480	1	1q32	TRAF3 interacting protein 3		GO:0016021(integral component of membrane)	GO:0005515(protein binding)
SEMA3G	ENSG00000010319	protein_coding	-	chr3:52467068-52479101	9.86651	3.05408	3.2306	1.6918	0.00195	0.0767778	up	56920	sem2	HGNC:HGNC:30400|Ensembl:ENSG00000010319|HPRD:14251|Vega:OTTHUMG00000158570	3	3p21.1	semaphorin 3G	hsa04360(Axon guidance)	GO:0070062(extracellular exosome)//GO:0005615(extracellular space)	GO:0038191(neuropilin binding)//GO:0045499(chemorepellent activity)//GO:0030215(semaphorin receptor binding)	GO:0048843(negative regulation of axon extension involved in axon guidance)//GO:0030335(positive regulation of cell migration)//GO:0001755(neural crest cell migration)//GO:0071526(semaphorin-plexin signaling pathway)//GO:0050919(negative chemotaxis)
FUZ	ENSG00000010361	protein_coding	-	chr19:50270179-50320633	3.42933	1.17047	2.92986	1.55083	0.0355	0.353018	up	80199	FY|NTD	MIM:610622|HGNC:HGNC:26219|Ensembl:ENSG00000010361|HPRD:08662|Vega:OTTHUMG00000167281	19	19q13.33	fuzzy planar cell polarity protein		GO:0070062(extracellular exosome)//GO:0005856(cytoskeleton)//GO:0005737(cytoplasm)		GO:0042384(cilium assembly)//GO:0003279(cardiac septum development)//GO:0010954(positive regulation of protein processing)//GO:0035904(aorta development)//GO:0008285(negative regulation of cell proliferation)//GO:0035058(nonmotile primary cilium assembly)//GO:0001843(neural tube closure)//GO:0090090(negative regulation of canonical Wnt signaling pathway)//GO:0015031(protein transport)//GO:0021513…
MRC2	ENSG00000011028	protein_coding	+	chr17:60704761-60770958	30.6285	14.7276	2.07968	1.05636	0.0326	0.337673	up	9902	CD280|CLEC13E|ENDO180|UPARAP	MIM:612264|HGNC:HGNC:16875|Ensembl:ENSG00000011028|HPRD:10094|Vega:OTTHUMG00000179178	17	17q23.2	mannose receptor, C type 2	hsa04145(Phagosome)//hsa05152(Tuberculosis)	GO:0016020(membrane)//GO:0016021(integral component of membrane)//GO:0005925(focal adhesion)	GO:0005518(collagen binding)//GO:0030246(carbohydrate binding)//GO:0005515(protein binding)	GO:0006897(endocytosis)//GO:0030574(collagen catabolic process)//GO:0001649(osteoblast differentiation)
KAL1	ENSG00000011201	protein_coding	-	chrX:8496914-8700227	7.15706	3.4918	2.04968	1.0354	0.02395	0.293864	up
TMEM159	ENSG00000011638	protein_coding	+	chr16:20944432-21191937	13.859	4.41674	3.13784	1.64977	0.00735	0.157997	up	57146	-	MIM:611304|HGNC:HGNC:30136|Ensembl:ENSG00000011638|HPRD:17428|Vega:OTTHUMG00000131559	16	16p12	transmembrane protein 159		GO:0016021(integral component of membrane)	GO:0005515(protein binding)
CALCOCO1	ENSG00000012822	protein_coding	-	chr12:54104901-54125008	64.1031	19.6294	3.26567	1.70738	0.014	0.223298	up	57658	Cocoa|PP13275|calphoglin	HGNC:HGNC:29306|Ensembl:ENSG00000012822|HPRD:13868|Vega:OTTHUMG00000170095	12	12q13.13	calcium binding and coiled-coil domain 1		GO:0043231(intracellular membrane-bounded organelle)//GO:0005634(nucleus)//GO:0005737(cytoplasm)//GO:0000790(nuclear chromatin)	GO:0030374(ligand-dependent nuclear receptor transcription coactivator activity)//GO:0003712(transcription cofactor activity)//GO:0008013(beta-catenin binding)//GO:0043565(sequence-specific DNA binding)//GO:0001047(core promoter binding)//GO:0003682(chromatin binding)//GO:0044212(transcription regulatory region DNA binding)//GO:0070016(armadillo repeat domain binding)//GO:0005515(protein binding)…	GO:0030518(intracellular steroid hormone receptor signaling pathway)//GO:0016055(Wnt signaling pathway)//GO:0006351(transcription, DNA-templated)//GO:0045944(positive regulation of transcription from RNA polymerase II promoter)//GO:0007165(signal transduction)//GO:0045893(positive regulation of transcription, DNA-templated)
CD6	ENSG00000013725	protein_coding	+	chr11:60739114-60787849	4.50884	0.464365	9.70965	3.27942	0.04475	0.387787	up	923	TP120	MIM:186720|HGNC:HGNC:1691|Ensembl:ENSG00000013725|HPRD:01724|Vega:OTTHUMG00000167823	11	11q13	CD6 molecule	hsa04514(Cell adhesion molecules (CAMs))	GO:0001772(immunological synapse)//GO:0016021(integral component of membrane)//GO:0005887(integral component of plasma membrane)//GO:0005576(extracellular region)//GO:0016020(membrane)//GO:0031226(intrinsic component of plasma membrane)//GO:0042101(T cell receptor complex)	GO:0005044(scavenger receptor activity)//GO:0070891(lipoteichoic acid binding)//GO:0005515(protein binding)//GO:0001530(lipopolysaccharide binding)	GO:0006898(receptor-mediated endocytosis)//GO:0045087(innate immune response)//GO:0007157(heterophilic cell-cell adhesion via plasma membrane cell adhesion molecules)//GO:0001771(immunological synapse formation)//GO:1900017(positive regulation of cytokine production involved in inflammatory response)//GO:0002438(acute inflammatory response to antigenic stimulus)//GO:0002250(adaptive immune respon…
ATP1A2	ENSG00000018625	protein_coding	+	chr1:160085548-160113381	7.32185	3.05101	2.39981	1.26292	0.044	0.385765	up	477	FHM2|MHP2	MIM:182340|HGNC:HGNC:800|Ensembl:ENSG00000018625|HPRD:01665|Vega:OTTHUMG00000024080	1	1q23.2	ATPase Na+/K+ transporting subunit alpha 2	hsa04022(cGMP-PKG signaling pathway)//hsa04024(cAMP signaling pathway)//hsa04260(Cardiac muscle contraction)//hsa04261(Adrenergic signaling in cardiomyocytes)//hsa04911(Insulin secretion)//hsa04918(Thyroid hormone synthesis)//hsa04919(Thyroid hormone signaling pathway)//hsa04960(Aldosterone-regulated sodium reabsorption)//hsa04961(Endocrine and other factor-regulated calcium reabsorption)//hsa049…	GO:0005768(endosome)//GO:0016021(integral component of membrane)//GO:0043209(myelin sheath)//GO:0005901(caveola)//GO:0014704(intercalated disc)//GO:1903561(extracellular vesicle)//GO:0005886(plasma membrane)//GO:0005829(cytosol)//GO:0043231(intracellular membrane-bounded organelle)//GO:0005737(cytoplasm)//GO:0016020(membrane)//GO:0030315(T-tubule)//GO:0043197(dendritic spine)//GO:0005890(sodium:p…	GO:0008144(drug binding)//GO:0005391(sodium:potassium-exchanging ATPase activity)//GO:0005524(ATP binding)//GO:0031402(sodium ion binding)//GO:0051087(chaperone binding)//GO:0030955(potassium ion binding)//GO:1990239(steroid hormone binding)//GO:0016887(ATPase activity)//GO:0046872(metal ion binding)//GO:0005515(protein binding)	GO:0036376(sodium ion export from cell)//GO:0055119(relaxation of cardiac muscle)//GO:0008152(metabolic process)//GO:0040011(locomotion)//GO:0086009(membrane repolarization)//GO:0051481(negative regulation of cytosolic calcium ion concentration)//GO:0001504(neurotransmitter uptake)//GO:0008542(visual learning)//GO:1903170(negative regulation of calcium ion transmembrane transport)//GO:0045988(neg…
CD74	ENSG00000019582	protein_coding	-	chr5:149781199-149792492	906.936	345.939	2.62166	1.39048	0.0106	0.192116	up	972	DHLAG|HLADG|II|Ia-GAMMA	MIM:142790|HGNC:HGNC:1697|Ensembl:ENSG00000019582|HPRD:00825|Vega:OTTHUMG00000163559	5	5q32	CD74 molecule	hsa04612(Antigen processing and presentation)//hsa05152(Tuberculosis)//hsa05168(Herpes simplex infection)	GO:0042613(MHC class II protein complex)//GO:0005770(late endosome)//GO:0071556(integral component of lumenal side of endoplasmic reticulum membrane)//GO:0005765(lysosomal membrane)//GO:0035693(NOS2-CD74 complex)//GO:0016020(membrane)//GO:0005773(vacuole)//GO:0012507(ER to Golgi transport vesicle membrane)//GO:0000139(Golgi membrane)//GO:0030669(clathrin-coated endocytic vesicle membrane)//GO:000…	GO:0050998(nitric-oxide synthase binding)//GO:0044183(protein binding involved in protein folding)//GO:0004896(cytokine receptor activity)//GO:0001540(beta-amyloid binding)//GO:0042802(identical protein binding)//GO:0042289(MHC class II protein binding)//GO:0023026(MHC class II protein complex binding)//GO:0019955(cytokine binding)//GO:0042658(MHC class II protein binding, via antigen binding gro…	GO:0030890(positive regulation of B cell proliferation)//GO:1902166(negative regulation of intrinsic apoptotic signaling pathway in response to DNA damage by p53 class mediator)//GO:0006886(intracellular protein transport)//GO:0001516(prostaglandin biosynthetic process)//GO:0019882(antigen processing and presentation)//GO:0045058(T cell selection)//GO:0043066(negative regulation of apoptotic proc…
SLAMF7	ENSG00000026751	protein_coding	+	chr1:160709036-160724611	17.427	6.35835	2.74081	1.4546	0.0156	0.236942	up	57823	19A|CD319|CRACC|CS1	MIM:606625|HGNC:HGNC:21394|Ensembl:ENSG00000026751|HPRD:09432|Vega:OTTHUMG00000024008	1	1q23.1-q24.1	SLAM family member 7		GO:0005783(endoplasmic reticulum)//GO:0016021(integral component of membrane)//GO:0005886(plasma membrane)		GO:0002250(adaptive immune response)//GO:0030101(natural killer cell activation)//GO:0042267(natural killer cell mediated cytotoxicity)//GO:0007155(cell adhesion)//GO:0050776(regulation of immune response)
BTN3A1	ENSG00000026950	protein_coding	+	chr6:26402464-26415444	37.8488	12.4563	3.03852	1.60337	0.00065	0.0370004	up	11119	BT3.1|BTF5|BTN3.1|CD277	MIM:613593|HGNC:HGNC:1138|Ensembl:ENSG00000026950|HPRD:10693|Vega:OTTHUMG00000014449	6	6p22.1	butyrophilin subfamily 3 member A1		GO:0005886(plasma membrane)//GO:0016021(integral component of membrane)	GO:0005515(protein binding)	GO:0002250(adaptive immune response)//GO:0050798(activated T cell proliferation)//GO:0050852(T cell receptor signaling pathway)//GO:0050663(cytokine secretion)//GO:0072643(interferon-gamma secretion)
IBSP	ENSG00000029559	protein_coding	+	chr4:88720732-88733074	109.094	8.30912	13.1294	3.71473	5e-05	0.00584669	up	3381	BNSP|BSP|BSP-II|SP-II	MIM:147563|HGNC:HGNC:5341|Ensembl:ENSG00000029559|HPRD:00951|Vega:OTTHUMG00000130600	4	4q21.1	integrin binding sialoprotein	hsa04151(PI3K-Akt signaling pathway)//hsa04510(Focal adhesion)//hsa04512(ECM-receptor interaction)	GO:0031988(membrane-bounded vesicle)//GO:0016020(membrane)//GO:0005576(extracellular region)//GO:0005615(extracellular space)//GO:0031012(extracellular matrix)	GO:0003674(molecular_function)	GO:0071363(cellular response to growth factor stimulus)//GO:0001649(osteoblast differentiation)//GO:0030282(bone mineralization)//GO:0007155(cell adhesion)//GO:0030198(extracellular matrix organization)
LRRC7	ENSG00000033122	protein_coding	+	chr1:70034080-70671303	1.91982	0.0223464	85.9121	6.42479	5e-05	0.00584669	up	57554	DENSIN	MIM:614453|HGNC:HGNC:18531|Ensembl:ENSG00000033122|HPRD:09930|Vega:OTTHUMG00000059194	1	1p31.1	leucine rich repeat containing 7		GO:0015629(actin cytoskeleton)//GO:0030175(filopodium)//GO:0045211(postsynaptic membrane)//GO:0014069(postsynaptic density)//GO:0043194(axon initial segment)//GO:0030054(cell junction)//GO:0043197(dendritic spine)//GO:0005737(cytoplasm)	GO:0005515(protein binding)//GO:0008022(protein C-terminus binding)	GO:0010976(positive regulation of neuron projection development)//GO:0014070(response to organic cyclic compound)
MYOC	ENSG00000034971	protein_coding	-	chr1:171604556-171621823	18.7687	2.99675	6.26303	2.64686	0.00075	0.0403276	up	4653	GLC1A|GPOA|JOAG|JOAG1|TIGR|myocilin	MIM:601652|HGNC:HGNC:7610|Ensembl:ENSG00000034971|HPRD:03387|Vega:OTTHUMG00000034789	1	1q23-q24	myocilin, trabecular meshwork inducible glucocorticoid response		GO:0005743(mitochondrial inner membrane)//GO:0005929(cilium)//GO:0005791(rough endoplasmic reticulum)//GO:0005794(Golgi apparatus)//GO:0033268(node of Ranvier)//GO:0005783(endoplasmic reticulum)//GO:0070062(extracellular exosome)//GO:0005741(mitochondrial outer membrane)//GO:0031410(cytoplasmic vesicle)//GO:0005578(proteinaceous extracellular matrix)//GO:0031012(extracellular matrix)//GO:0005758(…	GO:0001968(fibronectin binding)//GO:0030971(receptor tyrosine kinase binding)//GO:0032027(myosin light chain binding)//GO:0046872(metal ion binding)//GO:0005515(protein binding)//GO:0005109(frizzled binding)	GO:0031175(neuron projection development)//GO:0060348(bone development)//GO:1900026(positive regulation of substrate adhesion-dependent cell spreading)//GO:0043408(regulation of MAPK cascade)//GO:0001953(negative regulation of cell-matrix adhesion)//GO:0051897(positive regulation of protein kinase B signaling)//GO:0051901(positive regulation of mitochondrial depolarization)//GO:0035024(negative r…
DAPK2	ENSG00000035664	protein_coding	-	chr15:64199234-64364232	13.4443	2.41327	5.57098	2.47793	0.002	0.077489	up	23604	DRP-1|DRP1	MIM:616567|HGNC:HGNC:2675|Ensembl:ENSG00000035664|HPRD:09905|Vega:OTTHUMG00000132947	15	15q22.31	death-associated protein kinase 2	hsa05200(Pathways in cancer)//hsa05219(Bladder cancer)	GO:0016021(integral component of membrane)//GO:0031410(cytoplasmic vesicle)//GO:0005737(cytoplasm)//GO:0034423(autophagosome lumen)	GO:0004674(protein serine/threonine kinase activity)//GO:0005524(ATP binding)//GO:0005516(calmodulin binding)//GO:0042802(identical protein binding)//GO:0004672(protein kinase activity)//GO:0005515(protein binding)	GO:2000424(positive regulation of eosinophil chemotaxis)//GO:0006468(protein phosphorylation)//GO:0090023(positive regulation of neutrophil chemotaxis)//GO:2001242(regulation of intrinsic apoptotic signaling pathway)//GO:0046777(protein autophosphorylation)//GO:0010506(regulation of autophagy)//GO:0043276(anoikis)//GO:0035556(intracellular signal transduction)//GO:0006915(apoptotic process)//GO:0…
MRI1	ENSG00000037757	protein_coding	+	chr19:13875345-13889276	3.73545	0.636883	5.8652	2.55218	0.01345	0.219104	up	84245	MRDI|MTNA|Ypr118w	MIM:615105|HGNC:HGNC:28469|Ensembl:ENSG00000037757|HPRD:14548|Vega:OTTHUMG00000180867	19	19p13.2	methylthioribose-1-phosphate isomerase 1	hsa00270(Cysteine and methionine metabolism)//	GO:0005730(nucleolus)//GO:0042995(cell projection)//GO:0005737(cytoplasm)//GO:0005829(cytosol)	GO:0042802(identical protein binding)//GO:0046523(S-methyl-5-thioribose-1-phosphate isomerase activity)	GO:0044281(small molecule metabolic process)//GO:0006595(polyamine metabolic process)//GO:0019509(L-methionine biosynthetic process from methylthioadenosine)//GO:0019284(L-methionine biosynthetic process from S-adenosylmethionine)//GO:0034641(cellular nitrogen compound metabolic process)//GO:0000096(sulfur amino acid metabolic process)
PNKP	ENSG00000039650	protein_coding	-	chr19:50364460-50371166	10.488	2.36867	4.42777	2.14658	0.00035	0.0242638	up	11284	AOA4|EIEE10|MCSZ|PNK	MIM:605610|HGNC:HGNC:9154|Ensembl:ENSG00000039650|HPRD:09284|Vega:OTTHUMG00000183261	19	19q13.33	polynucleotide kinase 3'-phosphatase		GO:0005730(nucleolus)//GO:0016020(membrane)//GO:0005634(nucleus)//GO:0005654(nucleoplasm)	GO:0019201(nucleotide kinase activity)//GO:0005524(ATP binding)//GO:0003684(damaged DNA binding)//GO:0046404(ATP-dependent polydeoxyribonucleotide 5'-hydroxyl-kinase activity)//GO:0046403(polynucleotide 3'-phosphatase activity)//GO:0004519(endonuclease activity)//GO:0003690(double-stranded DNA binding)//GO:0005515(protein binding)//GO:0017076(purine nucleotide binding)	GO:1904355(positive regulation of telomere capping)//GO:0042769(DNA damage response, detection of DNA damage)//GO:0006979(response to oxidative stress)//GO:0032212(positive regulation of telomere maintenance via telomerase)//GO:0016311(dephosphorylation)//GO:0051973(positive regulation of telomerase activity)//GO:0098504(DNA 3' dephosphorylation involved in DNA repair)//GO:0006284(base-excision r…
AIFM2	ENSG00000042286	protein_coding	-	chr10:71812551-71892690	10.042	3.02644	3.31808	1.73035	0.0378	0.363415	up	84883	AMID|PRG3	MIM:605159|HGNC:HGNC:21411|Ensembl:ENSG00000042286|HPRD:09797|Vega:OTTHUMG00000018398	10	10q22.1	apoptosis inducing factor, mitochondria associated 2		GO:0016021(integral component of membrane)//GO:0005811(lipid particle)//GO:0005829(cytosol)//GO:0005739(mitochondrion)//GO:0005741(mitochondrial outer membrane)//GO:0005615(extracellular space)//GO:0005737(cytoplasm)	GO:0004174(electron-transferring-flavoprotein dehydrogenase activity)//GO:0050660(flavin adenine dinucleotide binding)//GO:0003677(DNA binding)	GO:0055114(oxidation-reduction process)//GO:0043065(positive regulation of apoptotic process)//GO:0008637(apoptotic mitochondrial changes)
CAPG	ENSG00000042493	protein_coding	-	chr2:85621870-85645555	56.0504	21.7975	2.57141	1.36256	0.018	0.253004	up	822	AFCP|HEL-S-66|MCP	MIM:153615|HGNC:HGNC:1474|Ensembl:ENSG00000042493|HPRD:01088|Vega:OTTHUMG00000130183	2	2p11.2	capping actin protein, gelsolin like		GO:0070062(extracellular exosome)//GO:0090543(Flemming body)//GO:0005814(centriole)//GO:0042470(melanosome)//GO:0005730(nucleolus)//GO:0005654(nucleoplasm)//GO:0008290(F-actin capping protein complex)//GO:0005634(nucleus)//GO:0005737(cytoplasm)//GO:0072686(mitotic spindle)	GO:0005515(protein binding)//GO:0003779(actin binding)//GO:0019904(protein domain specific binding)//GO:0032403(protein complex binding)	GO:0071803(positive regulation of podosome assembly)//GO:0006461(protein complex assembly)//GO:0022617(extracellular matrix disassembly)//GO:0051016(barbed-end actin filament capping)//GO:0030031(cell projection assembly)
PHKA2	ENSG00000044446	protein_coding	-	chrX:18908413-19002716	12.7486	2.74706	4.64082	2.21438	0.02005	0.266935	up	5256	GSD9A|PHK|PYK|PYKL|XLG|XLG2	MIM:300798|HGNC:HGNC:8926|Ensembl:ENSG00000044446|HPRD:02380|Vega:OTTHUMG00000021222	X	Xp22.2-p22.1	phosphorylase kinase, alpha 2 (liver)	hsa04020(Calcium signaling pathway)//hsa04910(Insulin signaling pathway)//hsa04922(Glucagon signaling pathway)	GO:0005886(plasma membrane)//GO:0005964(phosphorylase kinase complex)//GO:0005829(cytosol)	GO:0004689(phosphorylase kinase activity)//GO:0005516(calmodulin binding)	GO:0044281(small molecule metabolic process)//GO:0006468(protein phosphorylation)//GO:0006006(glucose metabolic process)//GO:0005975(carbohydrate metabolic process)//GO:0006091(generation of precursor metabolites and energy)//GO:0005980(glycogen catabolic process)//GO:0006464(cellular protein modification process)
DSG2	ENSG00000046604	protein_coding	+	chr18:29078005-29136874	7.2826	3.00255	2.42548	1.27827	0.0187	0.258537	up	1829	CDHF5|HDGC	MIM:125671|HGNC:HGNC:3049|Ensembl:ENSG00000046604|HPRD:00516|Vega:OTTHUMG00000179649	18	18q12.1	desmoglein 2	hsa05412(Arrhythmogenic right ventricular cardiomyopathy (ARVC))	GO:0005886(plasma membrane)//GO:0070062(extracellular exosome)//GO:0016328(lateral plasma membrane)//GO:0009986(cell surface)//GO:0014704(intercalated disc)//GO:0016021(integral component of membrane)//GO:0030057(desmosome)//GO:0005911(cell-cell junction)//GO:0016324(apical plasma membrane)	GO:0050839(cell adhesion molecule binding)//GO:0086083(cell adhesive protein binding involved in bundle of His cell-Purkinje myocyte communication)//GO:0005509(calcium ion binding)	GO:0006921(cellular component disassembly involved in execution phase of apoptosis)//GO:0032570(response to progesterone)//GO:0098911(regulation of ventricular cardiac muscle cell action potential)//GO:0007156(homophilic cell adhesion via plasma membrane adhesion molecules)//GO:0007155(cell adhesion)//GO:0012501(programmed cell death)//GO:0060135(maternal process involved in female pregnancy)//GO…
ANO2	ENSG00000047617	protein_coding	-	chr12:5641034-6055398	6.77244	1.65902	4.08218	2.02934	0.0167	0.243908	up	57101	C12orf3|TMEM16B	MIM:610109|HGNC:HGNC:1183|Ensembl:ENSG00000047617|HPRD:11634|Vega:OTTHUMG00000168264	12	12p13.3	anoctamin 2, calcium activated chloride channel	hsa04740(Olfactory transduction)	GO:0005654(nucleoplasm)//GO:0005886(plasma membrane)//GO:0031513(nonmotile primary cilium)//GO:0016021(integral component of membrane)//GO:0034707(chloride channel complex)	GO:0005229(intracellular calcium activated chloride channel activity)//GO:0046982(protein heterodimerization activity)//GO:0046983(protein dimerization activity)//GO:0042803(protein homodimerization activity)	GO:1902476(chloride transmembrane transport)//GO:0055085(transmembrane transport)//GO:0034220(ion transmembrane transport)
TSPAN17	ENSG00000048140	protein_coding	+	chr5:176074387-176086058	4.02421	1.24024	3.24469	1.69808	0.0191	0.261644	up	26262	FBX23|FBXO23|TM4SF17	HGNC:HGNC:13594|Ensembl:ENSG00000048140|HPRD:18198|Vega:OTTHUMG00000163230	5	5q35.3	tetraspanin 17		GO:0016021(integral component of membrane)//GO:0005887(integral component of plasma membrane)//GO:0000151(ubiquitin ligase complex)	GO:0004842(ubiquitin-protein transferase activity)//GO:0019899(enzyme binding)	GO:0072594(establishment of protein localization to organelle)//GO:0090002(establishment of protein localization to plasma membrane)//GO:0045747(positive regulation of Notch signaling pathway)//GO:0007166(cell surface receptor signaling pathway)//GO:0016567(protein ubiquitination)
H6PD	ENSG00000049239	protein_coding	+	chr1:9294833-9331396	24.0865	12.0763	1.99452	0.996045	0.0433	0.382565	up	9563	CORTRD1|G6PDH|GDH	MIM:138090|HGNC:HGNC:4795|Ensembl:ENSG00000049239|HPRD:00681|Vega:OTTHUMG00000001768	1	1p36	hexose-6-phosphate dehydrogenase (glucose 1-dehydrogenase)	hsa00030(Pentose phosphate pathway)//	GO:0005788(endoplasmic reticulum lumen)//GO:0005739(mitochondrion)	GO:0017057(6-phosphogluconolactonase activity)//GO:0004345(glucose-6-phosphate dehydrogenase activity)//GO:0030246(carbohydrate binding)//GO:0047936(glucose 1-dehydrogenase [NAD(P)] activity)//GO:0050661(NADP binding)	GO:0055114(oxidation-reduction process)//GO:0006098(pentose-phosphate shunt)//GO:0097305(response to alcohol)//GO:0006006(glucose metabolic process)
ELN	ENSG00000049540	protein_coding	+	chr7:73442118-73484237	5.87651	1.31588	4.46587	2.15894	0.0374	0.3619	up	2006	SVAS|WBS|WS	MIM:130160|HGNC:HGNC:3327|Ensembl:ENSG00000049540|HPRD:00556|Vega:OTTHUMG00000150229	7	7q11.23	elastin	hsa04974(Protein digestion and absorption)	GO:0005578(proteinaceous extracellular matrix)//GO:0005739(mitochondrion)//GO:0005576(extracellular region)//GO:0005615(extracellular space)//GO:0071953(elastic fiber)	GO:0005201(extracellular matrix structural constituent)//GO:0050840(extracellular matrix binding)//GO:0030023(extracellular matrix constituent conferring elasticity)//GO:0005515(protein binding)	GO:0007568(aging)//GO:0035904(aorta development)//GO:0071300(cellular response to retinoic acid)//GO:0055093(response to hyperoxia)//GO:0022617(extracellular matrix disassembly)//GO:0030198(extracellular matrix organization)//GO:0009887(organ morphogenesis)//GO:0071456(cellular response to hypoxia)//GO:0030833(regulation of actin filament polymerization)//GO:0008283(cell proliferation)//GO:000758…
FOXP3	ENSG00000049768	protein_coding	-	chrX:49091926-49121288	0.961572	0.0576776	16.6715	4.05931	0.0416	0.376456	up	50943	AIID|DIETER|IPEX|JM2|PIDX|XPID	MIM:300292|HGNC:HGNC:6106|Ensembl:ENSG00000049768|HPRD:02242|Vega:OTTHUMG00000024135	X	Xp11.23	forkhead box P3	hsa05321(Inflammatory bowel disease (IBD))	GO:0043234(protein complex)//GO:0005634(nucleus)//GO:0005737(cytoplasm)	GO:0051525(NFAT protein binding)//GO:0035035(histone acetyltransferase binding)//GO:0051059(NF-kappaB binding)//GO:0003700(transcription factor activity, sequence-specific DNA binding)//GO:0043565(sequence-specific DNA binding)//GO:0001047(core promoter binding)//GO:0042803(protein homodimerization activity)//GO:0042826(histone deacetylase binding)//GO:0003705(transcription factor activity, RNA p…	GO:0048294(negative regulation of isotype switching to IgE isotypes)//GO:0032831(positive regulation of CD4-positive, CD25-positive, alpha-beta regulatory T cell differentiation)//GO:0033092(positive regulation of immature T cell proliferation in thymus)//GO:0009653(anatomical structure morphogenesis)//GO:0032714(negative regulation of interleukin-5 production)//GO:0050710(negative regulation of …
ATP9A	ENSG00000054793	protein_coding	-	chr20:50213052-50385173	18.5639	8.28873	2.23966	1.16328	0.00805	0.166765	up	10079	ATPIIA	MIM:609126|HGNC:HGNC:13540|Ensembl:ENSG00000054793|HPRD:18541|Vega:OTTHUMG00000032751	20	20q13.2	ATPase phospholipid transporting 9A (putative)		GO:0005768(endosome)//GO:0016021(integral component of membrane)//GO:0005802(trans-Golgi network)//GO:0055037(recycling endosome)//GO:0048471(perinuclear region of cytoplasm)//GO:0005886(plasma membrane)//GO:0031901(early endosome membrane)//GO:0005769(early endosome)	GO:0005524(ATP binding)//GO:0000287(magnesium ion binding)//GO:0004012(phospholipid-translocating ATPase activity)	GO:0006897(endocytosis)//GO:0008152(metabolic process)//GO:0045332(phospholipid translocation)//GO:0006890(retrograde vesicle-mediated transport, Golgi to ER)
TRAF1	ENSG00000056558	protein_coding	-	chr9:123664670-123691451	5.62476	2.64891	2.12344	1.0864	0.0492	0.403133	up	7185	EBI6|MGC:10353	MIM:601711|HGNC:HGNC:12031|Ensembl:ENSG00000056558|HPRD:03418	9	9q33-q34	TNF receptor associated factor 1	hsa04064(NF-kappa B signaling pathway)//hsa04210(Apoptosis)//hsa04668(TNF signaling pathway)//hsa05168(Herpes simplex infection)//hsa05169(Epstein-Barr virus infection)//hsa05200(Pathways in cancer)//hsa05202(Transcriptional misregulation in cancer)//hsa05203(Viral carcinogenesis)//hsa05222(Small cell lung cancer)	GO:0005737(cytoplasm)//GO:0005829(cytosol)	GO:0005515(protein binding)//GO:0008270(zinc ion binding)//GO:0005164(tumor necrosis factor receptor binding)//GO:0031625(ubiquitin protein ligase binding)//GO:0031996(thioesterase binding)	GO:2001236(regulation of extrinsic apoptotic signaling pathway)//GO:0010803(regulation of tumor necrosis factor-mediated signaling pathway)//GO:0007166(cell surface receptor signaling pathway)//GO:0006461(protein complex assembly)//GO:0033209(tumor necrosis factor-mediated signaling pathway)//GO:0006915(apoptotic process)//GO:0051092(positive regulation of NF-kappaB transcription factor activity)
GYG2	ENSG00000056998	protein_coding	+	chrX:2746828-2800859	27.314	7.35837	3.71196	1.89218	0.0028	0.0937083	up	8908	GN-2|GN2	MIM:300198|HGNC:HGNC:4700|Ensembl:ENSG00000056998|HPRD:02185|Vega:OTTHUMG00000021079	X	Xp22.3	glycogenin 2		GO:0043202(lysosomal lumen)//GO:0005829(cytosol)	GO:0016757(transferase activity, transferring glycosyl groups)//GO:0008466(glycogenin glucosyltransferase activity)	GO:0008152(metabolic process)//GO:0044281(small molecule metabolic process)//GO:0005978(glycogen biosynthetic process)//GO:0006006(glucose metabolic process)//GO:0005975(carbohydrate metabolic process)//GO:0005980(glycogen catabolic process)
USP13	ENSG00000058056	protein_coding	+	chr3:179370542-179507189	7.30576	3.37927	2.16195	1.11233	0.02055	0.270438	up	8975	ISOT3|IsoT-3	MIM:603591|HGNC:HGNC:12611|Ensembl:ENSG00000058056|HPRD:04666|Vega:OTTHUMG00000157783	3	3q26.2-q26.3	ubiquitin specific peptidase 13 (isopeptidase T-3)			GO:1904288(BAT3 complex binding)//GO:0008270(zinc ion binding)//GO:0004197(cysteine-type endopeptidase activity)//GO:1904454(ubiquitin-specific protease activity involved in positive regulation of ERAD pathway)//GO:0043130(ubiquitin binding)//GO:0036459(thiol-dependent ubiquitinyl hydrolase activity)//GO:0051087(chaperone binding)//GO:0070628(proteasome binding)//GO:0008242(omega peptidase activi…	GO:0016579(protein deubiquitination)//GO:1904378(maintenance of unfolded protein involved in ERAD pathway)//GO:0070536(protein K63-linked deubiquitination)//GO:0008283(cell proliferation)//GO:0030318(melanocyte differentiation)//GO:0050821(protein stabilization)//GO:0010506(regulation of autophagy)//GO:0006511(ubiquitin-dependent protein catabolic process)//GO:0006914(autophagy)//GO:0006355(regul…
UNKL	ENSG00000059145	protein_coding	-	chr16:1401923-1464752	8.23142	2.23556	3.68205	1.88051	0.006	0.143963	up	64718	C16orf28|ZC3H5L|ZC3HDC5L	HGNC:HGNC:14184|Ensembl:ENSG00000059145|HPRD:15612|Vega:OTTHUMG00000128553	16	16p13.3	unkempt family like zinc finger		GO:0005634(nucleus)//GO:0005737(cytoplasm)	GO:0016874(ligase activity)//GO:0008270(zinc ion binding)//GO:0005515(protein binding)	GO:0016567(protein ubiquitination)
TARBP1	ENSG00000059588	protein_coding	-	chr1:234527058-234614849	25.4261	14.3298	1.77435	0.827294	0.0285	0.319223	up	6894	TRM3|TRP-185|TRP185	MIM:605052|HGNC:HGNC:11568|Ensembl:ENSG00000059588|HPRD:05445|Vega:OTTHUMG00000037947	1	1q42.3	TAR (HIV-1) RNA binding protein 1		GO:0005634(nucleus)	GO:0003723(RNA binding)//GO:0016423(tRNA (guanine) methyltransferase activity)	GO:0006357(regulation of transcription from RNA polymerase II promoter)//GO:0030488(tRNA methylation)
CTDP1	ENSG00000060069	protein_coding	+	chr18:77439800-77514510	3.37221	1.06995	3.15174	1.65615	0.01715	0.247324	up	9150	CCFDN|FCP1	MIM:604927|HGNC:HGNC:2498|Ensembl:ENSG00000060069|HPRD:05377|Vega:OTTHUMG00000132920	18	18q23	CTD phosphatase subunit 1		GO:0015629(actin cytoskeleton)//GO:0016591(DNA-directed RNA polymerase II, holoenzyme)//GO:0051233(spindle midzone)//GO:0005813(centrosome)//GO:0005819(spindle)//GO:0030496(midbody)//GO:0005654(nucleoplasm)//GO:0005634(nucleus)//GO:0005737(cytoplasm)//GO:0000922(spindle pole)	GO:0008420(CTD phosphatase activity)//GO:0005515(protein binding)//GO:0004721(phosphoprotein phosphatase activity)	GO:0051301(cell division)//GO:0006470(protein dephosphorylation)//GO:0070940(dephosphorylation of RNA polymerase II C-terminal domain)//GO:0010467(gene expression)//GO:0006366(transcription from RNA polymerase II promoter)//GO:0016032(viral process)//GO:0010458(exit from mitosis)//GO:0050434(positive regulation of viral transcription)//GO:0006368(transcription elongation from RNA polymerase II pr…
SPHK2	ENSG00000063176	protein_coding	+	chr19:49118584-49140695	2.68941	0.546193	4.92393	2.29981	0.0128	0.212541	up	56848	SK 2|SK-2|SPK 2|SPK-2	MIM:607092|HGNC:HGNC:18859|Ensembl:ENSG00000063176|HPRD:06157|Vega:OTTHUMG00000183318	19	19q13.2	sphingosine kinase 2	hsa00600(Sphingolipid metabolism)//	GO:0005765(lysosomal membrane)//GO:0016020(membrane)//GO:0005829(cytosol)	GO:0005524(ATP binding)//GO:0017016(Ras GTPase binding)//GO:0038036(sphingosine-1-phosphate receptor activity)//GO:0016301(kinase activity)//GO:0005515(protein binding)//GO:0008481(sphinganine kinase activity)//GO:0017050(D-erythro-sphingosine kinase activity)	GO:0008284(positive regulation of cell proliferation)//GO:0030148(sphingolipid biosynthetic process)//GO:0044281(small molecule metabolic process)//GO:0007420(brain development)//GO:0046834(lipid phosphorylation)//GO:0016310(phosphorylation)//GO:0046512(sphingosine biosynthetic process)//GO:0008283(cell proliferation)//GO:0007565(female pregnancy)//GO:0006669(sphinganine-1-phosphate biosynthetic …
DLX3	ENSG00000064195	protein_coding	-	chr17:48067368-48072588	17.2419	6.69195	2.57651	1.36542	0.00805	0.166765	up	1747	AI4|TDO	MIM:600525|HGNC:HGNC:2916|Ensembl:ENSG00000064195|HPRD:02752|Vega:OTTHUMG00000161892	17	17q21	distal-less homeobox 3		GO:0005634(nucleus)	GO:0001077(transcriptional activator activity, RNA polymerase II core promoter proximal region sequence-specific binding)//GO:0043565(sequence-specific DNA binding)//GO:0003682(chromatin binding)//GO:0003700(transcription factor activity, sequence-specific DNA binding)	GO:0071895(odontoblast differentiation)//GO:0042475(odontogenesis of dentin-containing tooth)//GO:0001568(blood vessel development)//GO:0006366(transcription from RNA polymerase II promoter)//GO:0045944(positive regulation of transcription from RNA polymerase II promoter)//GO:0001890(placenta development)//GO:0006355(regulation of transcription, DNA-templated)
EYA2	ENSG00000064655	protein_coding	+	chr20:45523262-45817492	2.86751	0.480269	5.97062	2.57788	0.0071	0.155727	up	2139	EAB1	MIM:601654|HGNC:HGNC:3520|Ensembl:ENSG00000064655|HPRD:09041|Vega:OTTHUMG00000033041	20	20q13.1	EYA transcriptional coactivator and phosphatase 2		GO:0005654(nucleoplasm)//GO:0005739(mitochondrion)	GO:0005515(protein binding)//GO:0046872(metal ion binding)//GO:0000287(magnesium ion binding)//GO:0004725(protein tyrosine phosphatase activity)	GO:0014706(striated muscle tissue development)//GO:0016576(histone dephosphorylation)//GO:0006351(transcription, DNA-templated)//GO:0006302(double-strand break repair)//GO:0007501(mesodermal cell fate specification)//GO:0007275(multicellular organism development)//GO:0097192(extrinsic apoptotic signaling pathway in absence of ligand)//GO:0097345(mitochondrial outer membrane permeabilization)//GO:…
ABCA7	ENSG00000064687	protein_coding	+	chr19:1040101-1065571	5.04034	0.788558	6.39183	2.67623	0.0001	0.0101099	up	10347	ABCA-SSN|ABCX	MIM:605414|HGNC:HGNC:37|Ensembl:ENSG00000064687|HPRD:09255|Vega:OTTHUMG00000167547	19	19p13.3	ATP binding cassette subfamily A member 7	hsa02010(ABC transporters)	GO:0001891(phagocytic cup)//GO:0005886(plasma membrane)//GO:0043190(ATP-binding cassette (ABC) transporter complex)//GO:0009986(cell surface)//GO:0043231(intracellular membrane-bounded organelle)//GO:0005794(Golgi apparatus)//GO:0016021(integral component of membrane)//GO:0031901(early endosome membrane)//GO:0030054(cell junction)//GO:0000139(Golgi membrane)//GO:0032587(ruffle membrane)//GO:00163…	GO:0005524(ATP binding)//GO:0005215(transporter activity)//GO:0005548(phospholipid transporter activity)//GO:0034188(apolipoprotein A-I receptor activity)//GO:0016887(ATPase activity)//GO:0042626(ATPase activity, coupled to transmembrane movement of substances)	GO:0038027(apolipoprotein A-I-mediated signaling pathway)//GO:0018149(peptide cross-linking)//GO:1901076(positive regulation of engulfment of apoptotic cell)//GO:0033700(phospholipid efflux)//GO:0034504(protein localization to nucleus)//GO:0042985(negative regulation of amyloid precursor protein biosynthetic process)//GO:0010875(positive regulation of cholesterol efflux)//GO:0050766(positive regu…
SLC9A3R2	ENSG00000065054	protein_coding	+	chr16:2075356-2089027	12.2214	4.22096	2.89541	1.53377	0.02065	0.270653	up	9351	E3KARP|NHE3RF2|NHERF-2|NHERF2|OCTS2|SIP-1|SIP1|TKA-1	MIM:606553|HGNC:HGNC:11076|Ensembl:ENSG00000065054|HPRD:05946|Vega:OTTHUMG00000176956	16	16p13.3	SLC9A3 regulator 2	hsa04960(Aldosterone-regulated sodium reabsorption)	GO:0005886(plasma membrane)//GO:0043234(protein complex)//GO:0005737(cytoplasm)//GO:0012505(endomembrane system)//GO:0070062(extracellular exosome)//GO:0005925(focal adhesion)//GO:0005634(nucleus)//GO:0016324(apical plasma membrane)	GO:0050750(low-density lipoprotein particle receptor binding)//GO:0019902(phosphatase binding)//GO:0008013(beta-catenin binding)//GO:0005102(receptor binding)//GO:0030165(PDZ domain binding)//GO:0016247(channel regulator activity)//GO:0032947(protein complex scaffold)//GO:0005515(protein binding)//GO:0008022(protein C-terminus binding)	GO:0006461(protein complex assembly)//GO:0048839(inner ear development)//GO:0045838(positive regulation of membrane potential)
NTN1	ENSG00000065320	protein_coding	+	chr17:8924858-9147317	3.02466	0.354149	8.54062	3.09434	0.002	0.077489	up	9423	NTN1L	MIM:601614|HGNC:HGNC:8029|Ensembl:ENSG00000065320|HPRD:03368|Vega:OTTHUMG00000130257	17	17p13.1	netrin 1	hsa04360(Axon guidance)	GO:0005604(basement membrane)//GO:0005576(extracellular region)//GO:0005737(cytoplasm)	GO:0005515(protein binding)	GO:0008284(positive regulation of cell proliferation)//GO:0006915(apoptotic process)//GO:0030517(negative regulation of axon extension)//GO:0033564(anterior/posterior axon guidance)//GO:0030334(regulation of cell migration)//GO:0042472(inner ear morphogenesis)//GO:0040023(establishment of nucleus localization)//GO:0032488(Cdc42 protein signal transduction)//GO:0007265(Ras protein signal transduct…
NGEF	ENSG00000066248	protein_coding	-	chr2:233562008-233880595	1.39976	0.0823235	17.0031	4.08773	0.0014	0.063052	up	25791	ARHGEF27|EPHEXIN	MIM:605991|HGNC:HGNC:7807|Ensembl:ENSG00000066248|HPRD:10442|Vega:OTTHUMG00000133272	2	2q37	neuronal guanine nucleotide exchange factor	hsa04360(Axon guidance)	GO:0016020(membrane)//GO:0030426(growth cone)//GO:0005829(cytosol)	GO:0005089(Rho guanyl-nucleotide exchange factor activity)//GO:0005085(guanyl-nucleotide exchange factor activity)	GO:0061002(negative regulation of dendritic spine morphogenesis)//GO:0007411(axon guidance)//GO:0048013(ephrin receptor signaling pathway)//GO:0043065(positive regulation of apoptotic process)//GO:0007264(small GTPase mediated signal transduction)//GO:0043547(positive regulation of GTPase activity)//GO:0048011(neurotrophin TRK receptor signaling pathway)//GO:0035023(regulation of Rho protein sign…
ZNRD1	ENSG00000066379	protein_coding	+	chr6:29968787-30032686	12.1757	2.15629	5.64659	2.49738	0.04855	0.400852	up	30834	HTEX-6|HTEX6|Rpa12|TCTEX6|TEX6|ZR14|hZR14|tctex-6	MIM:607525|HGNC:HGNC:13182|Ensembl:ENSG00000066379|HPRD:09601|Vega:OTTHUMG00000031149	6	6p21.3	zinc ribbon domain containing 1	hsa00230(Purine metabolism)//hsa00240(Pyrimidine metabolism)//	GO:0005654(nucleoplasm)//GO:0005736(DNA-directed RNA polymerase I complex)	GO:0001054(RNA polymerase I activity)//GO:0003676(nucleic acid binding)//GO:0008270(zinc ion binding)	GO:0045815(positive regulation of gene expression, epigenetic)//GO:0006362(transcription elongation from RNA polymerase I promoter)//GO:0006360(transcription from RNA polymerase I promoter)//GO:0040029(regulation of gene expression, epigenetic)//GO:0010467(gene expression)//GO:0045814(negative regulation of gene expression, epigenetic)//GO:0006363(termination of RNA polymerase I transcription)//G…
METTL22	ENSG00000067365	protein_coding	+	chr16:8715539-8740081	12.5029	3.83773	3.25789	1.70394	0.0067	0.152288	up	79091	C16orf68	MIM:615261|HGNC:HGNC:28368|Ensembl:ENSG00000067365|HPRD:08324|Vega:OTTHUMG00000129694	16	16p13.2	methyltransferase like 22		GO:0005886(plasma membrane)//GO:0005634(nucleus)//GO:0005794(Golgi apparatus)//GO:0043231(intracellular membrane-bounded organelle)//GO:0005737(cytoplasm)	GO:0008168(methyltransferase activity)	GO:0032259(methylation)
HDAC4	ENSG00000068024	protein_coding	-	chr2:239969863-240324058	10.6308	2.80022	3.79642	1.92464	0.00025	0.0191053	up	9759	AHO3|BDMR|HA6116|HD4|HDAC-4|HDAC-A|HDACA	MIM:605314|HGNC:HGNC:14063|Ensembl:ENSG00000068024|HPRD:05610|Vega:OTTHUMG00000133344	2	2q37.3	histone deacetylase 4	hsa05034(Alcoholism)//hsa05169(Epstein-Barr virus infection)//hsa05203(Viral carcinogenesis)//hsa05206(MicroRNAs in cancer)	GO:0030018(Z disc)//GO:0031672(A band)//GO:0000118(histone deacetylase complex)//GO:0017053(transcriptional repressor complex)//GO:0005829(cytosol)//GO:0042641(actomyosin)//GO:0031594(neuromuscular junction)//GO:0005654(nucleoplasm)//GO:0005634(nucleus)//GO:0005737(cytoplasm)	GO:0032041(NAD-dependent histone deacetylase activity (H3-K14 specific))//GO:0008270(zinc ion binding)//GO:0019901(protein kinase binding)//GO:0043565(sequence-specific DNA binding)//GO:0001047(core promoter binding)//GO:0003682(chromatin binding)//GO:0033613(activating transcription factor binding)//GO:0001025(RNA polymerase III transcription factor binding)//GO:0070491(repressing transcription …	GO:0000122(negative regulation of transcription from RNA polymerase II promoter)//GO:0045820(negative regulation of glycolytic process)//GO:0048742(regulation of skeletal muscle fiber development)//GO:0071374(cellular response to parathyroid hormone stimulus)//GO:0042113(B cell activation)//GO:0008285(negative regulation of cell proliferation)//GO:0016575(histone deacetylation)//GO:0045893(positi…
IFI35	ENSG00000068079	protein_coding	+	chr17:41158741-41166473	7.32893	1.25596	5.83531	2.54481	0.0012	0.0569516	up	3430	IFP35	MIM:600735|HGNC:HGNC:5399|Ensembl:ENSG00000068079|HPRD:02844|Vega:OTTHUMG00000167720	17	17q21	interferon induced protein 35		GO:0005634(nucleus)//GO:0005829(cytosol)	GO:0005515(protein binding)	GO:0060337(type I interferon signaling pathway)//GO:0019221(cytokine-mediated signaling pathway)
RASGRP2	ENSG00000068831	protein_coding	-	chr11:64494382-64512928	4.96984	1.57229	3.16091	1.66034	0.00875	0.17528	up	10235	CALDAG-GEFI|CDC25L	MIM:605577|HGNC:HGNC:9879|Ensembl:ENSG00000068831|HPRD:09278|Vega:OTTHUMG00000045420	11	11q13	RAS guanyl releasing protein 2	hsa04010(MAPK signaling pathway)//hsa04014(Ras signaling pathway)//hsa04015(Rap1 signaling pathway)//hsa04062(Chemokine signaling pathway)//hsa04611(Platelet activation)//hsa05200(Pathways in cancer)	GO:0005886(plasma membrane)//GO:0043005(neuron projection)//GO:0005829(cytosol)//GO:0045202(synapse)//GO:0030054(cell junction)//GO:0005622(intracellular)//GO:0032587(ruffle membrane)	GO:0008289(lipid binding)//GO:0005085(guanyl-nucleotide exchange factor activity)//GO:0005509(calcium ion binding)//GO:0019992(diacylglycerol binding)	GO:0030168(platelet activation)//GO:0007596(blood coagulation)//GO:0007264(small GTPase mediated signal transduction)//GO:0043547(positive regulation of GTPase activity)//GO:0007265(Ras protein signal transduction)//GO:0001558(regulation of cell growth)//GO:0071277(cellular response to calcium ion)//GO:0007165(signal transduction)
PYGM	ENSG00000068976	protein_coding	-	chr11:64513860-64527769	2.56624	0.517295	4.96086	2.31059	0.0281	0.317122	up	5837	-	MIM:608455|HGNC:HGNC:9726|Ensembl:ENSG00000068976|HPRD:01986|Vega:OTTHUMG00000066835	11	11q12-q13.2	phosphorylase, glycogen, muscle	hsa00500(Starch and sucrose metabolism)//	GO:0016529(sarcoplasmic reticulum)//GO:0070062(extracellular exosome)//GO:0005737(cytoplasm)//GO:0005829(cytosol)	GO:0030170(pyridoxal phosphate binding)//GO:0016208(AMP binding)//GO:0030246(carbohydrate binding)//GO:0008184(glycogen phosphorylase activity)//GO:0008144(drug binding)//GO:0005515(protein binding)	GO:0044281(small molecule metabolic process)//GO:0005977(glycogen metabolic process)//GO:0001666(response to hypoxia)//GO:0006874(cellular calcium ion homeostasis)//GO:0051591(response to cAMP)//GO:0006006(glucose metabolic process)//GO:0005975(carbohydrate metabolic process)//GO:0005980(glycogen catabolic process)
SDK2	ENSG00000069188	protein_coding	-	chr17:71330522-71640228	0.972034	0.177091	5.48891	2.45652	0.01645	0.243377	up	54549	-	MIM:607217|HGNC:HGNC:19308|Ensembl:ENSG00000069188|HPRD:06239|Vega:OTTHUMG00000152726	17	17q25.1	sidekick cell adhesion molecule 2		GO:0045202(synapse)//GO:0016021(integral component of membrane)//GO:0030054(cell junction)//GO:0005886(plasma membrane)		GO:0010842(retina layer formation)//GO:0007156(homophilic cell adhesion via plasma membrane adhesion molecules)//GO:0007416(synapse assembly)//GO:0060219(camera-type eye photoreceptor cell differentiation)
MAOB	ENSG00000069535	protein_coding	-	chrX:43625857-43741693	20.0185	9.19232	2.17775	1.12284	0.02725	0.312988	up	4129	-	MIM:309860|HGNC:HGNC:6834|Ensembl:ENSG00000069535|HPRD:02401|Vega:OTTHUMG00000021388	X	Xp11.23	monoamine oxidase B	hsa00260(Glycine, serine and threonine metabolism)//hsa00330(Arginine and proline metabolism)//hsa00340(Histidine metabolism)//hsa00350(Tyrosine metabolism)//hsa00360(Phenylalanine metabolism)//hsa00380(Tryptophan metabolism)//hsa00982(Drug metabolism - cytochrome P450)//	GO:0005743(mitochondrial inner membrane)//GO:0070062(extracellular exosome)//GO:0016021(integral component of membrane)//GO:0005740(mitochondrial envelope)//GO:0005739(mitochondrion)//GO:0005741(mitochondrial outer membrane)	GO:0050660(flavin adenine dinucleotide binding)//GO:0009055(electron carrier activity)//GO:0008131(primary amine oxidase activity)//GO:0042803(protein homodimerization activity)	GO:0055114(oxidation-reduction process)//GO:0010269(response to selenium ion)//GO:0044281(small molecule metabolic process)//GO:0042493(response to drug)//GO:0009636(response to toxic substance)//GO:0032496(response to lipopolysaccharide)//GO:0050665(hydrogen peroxide biosynthetic process)//GO:0045471(response to ethanol)//GO:0051412(response to corticosterone)//GO:0010044(response to aluminum io…
PHRF1	ENSG00000070047	protein_coding	+	chr11:576485-612222	5.15397	2.10122	2.45285	1.29446	0.0293	0.322782	up	57661	PPP1R125|RNF221	MIM:611780|HGNC:HGNC:24351|Ensembl:ENSG00000070047|HPRD:13870|Vega:OTTHUMG00000165141	11	11p15.5	PHD and ring finger domains 1		GO:0016020(membrane)	GO:0070063(RNA polymerase binding)//GO:0008270(zinc ion binding)//GO:0019904(protein domain specific binding)	GO:0006397(mRNA processing)//GO:0006366(transcription from RNA polymerase II promoter)
PTPN3	ENSG00000070159	protein_coding	-	chr9:112137745-112260590	5.01209	2.36554	2.11879	1.08324	0.01775	0.251126	up	5774	PTP-H1|PTPH1	MIM:176877|HGNC:HGNC:9655|Ensembl:ENSG00000070159|HPRD:06767|Vega:OTTHUMG00000020475	9	9q31	protein tyrosine phosphatase, non-receptor type 3		GO:0019898(extrinsic component of membrane)//GO:0005856(cytoskeleton)//GO:0005737(cytoplasm)//GO:0009898(cytoplasmic side of plasma membrane)	GO:0001784(phosphotyrosine binding)//GO:0008092(cytoskeletal protein binding)//GO:0017080(sodium channel regulator activity)//GO:0004725(protein tyrosine phosphatase activity)//GO:0005515(protein binding)//GO:0051117(ATPase binding)	GO:2000649(regulation of sodium ion transmembrane transporter activity)//GO:0051045(negative regulation of membrane protein ectodomain proteolysis)//GO:0097421(liver regeneration)//GO:0098902(regulation of membrane depolarization during action potential)//GO:0045930(negative regulation of mitotic cell cycle)//GO:0006470(protein dephosphorylation)//GO:0035335(peptidyl-tyrosine dephosphorylation)
ST6GALNAC2	ENSG00000070731	protein_coding	-	chr17:74553845-74583038	7.77244	0.660055	11.7754	3.55771	0.00195	0.0767778	up	10610	SAITL1|SIAT7|SIAT7B|SIATL1|ST6GalNAII|STHM	MIM:610137|HGNC:HGNC:10867|Ensembl:ENSG00000070731|HPRD:10231|Vega:OTTHUMG00000180301	17	17q25.1	ST6 (alpha-N-acetyl-neuraminyl-2,3-beta-galactosyl-1,3)-N-acetylgalactosaminide alpha-2,6-sialyltransferase 2		GO:0016021(integral component of membrane)//GO:0030173(integral component of Golgi membrane)//GO:0005794(Golgi apparatus)//GO:0000139(Golgi membrane)	GO:0008373(sialyltransferase activity)	GO:0044267(cellular protein metabolic process)//GO:0006488(dolichol-linked oligosaccharide biosynthetic process)//GO:0009311(oligosaccharide metabolic process)//GO:0006493(protein O-linked glycosylation)//GO:0043687(post-translational protein modification)//GO:0016266(O-glycan processing)//GO:0001574(ganglioside biosynthetic process)//GO:0018279(protein N-linked glycosylation via asparagine)//GO:…
LPHN1	ENSG00000072071	protein_coding	-	chr19:14247990-14316999	3.53249	0.82917	4.26026	2.09094	0.01935	0.262659	up
EPN2	ENSG00000072134	protein_coding	+	chr17:19118927-19240028	20.4059	9.05108	2.25454	1.17283	0.0139	0.222251	up	22905	EHB21	MIM:607263|HGNC:HGNC:18639|Ensembl:ENSG00000072134|HPRD:06271|Vega:OTTHUMG00000187034	17	17p11.2	epsin 2	hsa04144(Endocytosis)	GO:0005654(nucleoplasm)//GO:0043231(intracellular membrane-bounded organelle)//GO:0030128(clathrin coat of endocytic vesicle)//GO:0005794(Golgi apparatus)	GO:0008289(lipid binding)//GO:0005515(protein binding)	GO:0006897(endocytosis)//GO:0007219(Notch signaling pathway)//GO:0030100(regulation of endocytosis)//GO:0048568(embryonic organ development)//GO:0001701(in utero embryonic development)
LIMS2	ENSG00000072163	protein_coding	-	chr2:128395955-128439360	10.4392	1.04295	10.0092	3.32326	0.0001	0.0101099	up	55679	PINCH-2|PINCH2	MIM:607908|HGNC:HGNC:16084|Ensembl:ENSG00000072163|Vega:OTTHUMG00000131529	2	2q14.3	LIM zinc finger domain containing 2		GO:0005886(plasma membrane)//GO:0005634(nucleus)//GO:0005925(focal adhesion)//GO:0005829(cytosol)	GO:0008270(zinc ion binding)//GO:0005515(protein binding)	GO:2000178(negative regulation of neural precursor cell proliferation)//GO:0016337(single organismal cell-cell adhesion)//GO:2001046(positive regulation of integrin-mediated signaling pathway)//GO:2000346(negative regulation of hepatocyte proliferation)//GO:0034329(cell junction assembly)//GO:0043066(negative regulation of apoptotic process)//GO:0045216(cell-cell junction organization)
SPEG	ENSG00000072195	protein_coding	+	chr2:220299567-220403494	7.51266	2.22054	3.38325	1.75841	0.01245	0.208874	up	10290	APEG-1|APEG1|BPEG|CNM5|SPEGalpha|SPEGbeta	MIM:615950|HGNC:HGNC:16901|Ensembl:ENSG00000072195|HPRD:10653|Vega:OTTHUMG00000058925	2	2q35	SPEG complex locus		GO:0005634(nucleus)	GO:0005524(ATP binding)//GO:0005515(protein binding)//GO:0004674(protein serine/threonine kinase activity)	GO:0007517(muscle organ development)//GO:0006468(protein phosphorylation)//GO:0001701(in utero embryonic development)//GO:0008285(negative regulation of cell proliferation)//GO:0060541(respiratory system development)//GO:0055013(cardiac muscle cell development)
LLGL2	ENSG00000073350	protein_coding	+	chr17:73521160-73571289	1.46017	0.130603	11.1802	3.48288	5e-05	0.00584669	up	3993	HGL|Hugl-2|LGL2	HGNC:HGNC:6629|Ensembl:ENSG00000073350|HPRD:10041|Vega:OTTHUMG00000179685	17	17q25.1	lethal giant larvae homolog 2, scribble cell polarity complex component	hsa04390(Hippo signaling pathway)//hsa04530(Tight junction)	GO:0005654(nucleoplasm)//GO:0043231(intracellular membrane-bounded organelle)//GO:0005886(plasma membrane)//GO:0005737(cytoplasm)//GO:0030864(cortical actin cytoskeleton)	GO:0030165(PDZ domain binding)//GO:0005096(GTPase activator activity)//GO:0005515(protein binding)//GO:0017137(Rab GTPase binding)//GO:0019905(syntaxin binding)	GO:0060670(branching involved in labyrinthine layer morphogenesis)//GO:0009791(post-embryonic development)//GO:0017157(regulation of exocytosis)//GO:0035264(multicellular organism growth)//GO:0006887(exocytosis)//GO:0016332(establishment or maintenance of polarity of embryonic epithelium)//GO:0050708(regulation of protein secretion)//GO:0008593(regulation of Notch signaling pathway)//GO:0043547(p…
ST6GAL1	ENSG00000073849	protein_coding	+	chr3:186648273-186796341	56.8608	21.2393	2.67715	1.4207	0.02345	0.290298	up	6480	SIAT1|ST6GalI|ST6N	MIM:109675|HGNC:HGNC:10860|Ensembl:ENSG00000073849|HPRD:00184|Vega:OTTHUMG00000156500	3	3q27.3	ST6 beta-galactosamide alpha-2,6-sialyltranferase 1	hsa00510(N-Glycan biosynthesis)//hsa00514(Other types of O-glycan biosynthesis)//	GO:0016021(integral component of membrane)//GO:0070062(extracellular exosome)//GO:0000138(Golgi trans cisterna)//GO:0005794(Golgi apparatus)//GO:0032580(Golgi cisterna membrane)//GO:0030173(integral component of Golgi membrane)//GO:0005797(Golgi medial cisterna)//GO:0000139(Golgi membrane)//GO:0005783(endoplasmic reticulum)	GO:0003835(beta-galactoside alpha-2,6-sialyltransferase activity)//GO:0005515(protein binding)//GO:0008373(sialyltransferase activity)	GO:0044267(cellular protein metabolic process)//GO:0032946(positive regulation of mononuclear cell proliferation)//GO:1990743(protein sialylation)//GO:0006488(dolichol-linked oligosaccharide biosynthetic process)//GO:0006054(N-acetylneuraminate metabolic process)//GO:0006959(humoral immune response)//GO:0006493(protein O-linked glycosylation)//GO:1900024(regulation of substrate adhesion-dependent…
TBX21	ENSG00000073861	protein_coding	+	chr17:45810609-45823485	2.24875	0.220328	10.2064	3.3514	0.0024	0.0864312	up	30009	T-PET|T-bet|TBET|TBLYM	MIM:604895|HGNC:HGNC:11599|Ensembl:ENSG00000073861|HPRD:05355|Vega:OTTHUMG00000178287	17	17q21.32	T-box 21	hsa05321(Inflammatory bowel disease (IBD))	GO:0005634(nucleus)//GO:0043025(neuronal cell body)	GO:0044212(transcription regulatory region DNA binding)//GO:0003700(transcription factor activity, sequence-specific DNA binding)	GO:0071310(cellular response to organic substance)//GO:0072676(lymphocyte migration)//GO:0006351(transcription, DNA-templated)//GO:0030217(T cell differentiation)//GO:0007275(multicellular organism development)//GO:0009615(response to virus)//GO:0048304(positive regulation of isotype switching to IgG isotypes)//GO:0006355(regulation of transcription, DNA-templated)//GO:0045893(positive regulation…
SCARF1	ENSG00000074660	protein_coding	-	chr17:1537151-1549041	4.78974	1.93679	2.47303	1.30628	0.0251	0.300751	up	8578	SREC|SREC-I|SREC1	MIM:607873|HGNC:HGNC:16820|Ensembl:ENSG00000074660|HPRD:06386|Vega:OTTHUMG00000090555	17	17p13.3	scavenger receptor class F member 1		GO:0005886(plasma membrane)//GO:0016021(integral component of membrane)//GO:0030666(endocytic vesicle membrane)	GO:0005044(scavenger receptor activity)//GO:0030169(low-density lipoprotein particle binding)//GO:0004888(transmembrane signaling receptor activity)	GO:0010976(positive regulation of neuron projection development)//GO:0006898(receptor-mediated endocytosis)//GO:0016322(neuron remodeling)//GO:0007155(cell adhesion)//GO:0048680(positive regulation of axon regeneration)//GO:0006707(cholesterol catabolic process)//GO:0016358(dendrite development)//GO:0007165(signal transduction)
IPCEF1	ENSG00000074706	protein_coding	-	chr6:154331630-154677926	4.87735	0.94646	5.15324	2.36548	0.0251	0.300751	up	26034	PIP3-E	HGNC:HGNC:21204|Ensembl:ENSG00000074706|HPRD:17851|Vega:OTTHUMG00000015872	6	6q25.2	interaction protein for cytohesin exchange factors 1		GO:0005886(plasma membrane)//GO:0005829(cytosol)	GO:0005344(oxygen transporter activity)//GO:0019904(protein domain specific binding)//GO:0004601(peroxidase activity)	GO:0098869(cellular oxidant detoxification)//GO:0015671(oxygen transport)//GO:0006979(response to oxidative stress)
WSCD2	ENSG00000075035	protein_coding	+	chr12:108523247-108644314	2.62795	0.0710889	36.9671	5.20817	0.0375	0.361965	up	9671	-	HGNC:HGNC:29117|Ensembl:ENSG00000075035|HPRD:17196|Vega:OTTHUMG00000169579	12	12q23.3	WSC domain containing 2		GO:0016021(integral component of membrane)
PTPN23	ENSG00000076201	protein_coding	+	chr3:47422490-47454931	1.40236	0.180338	7.77628	2.95908	0.0254	0.302107	up	25930	HD-PTP|HDPTP|PTP-TD14	MIM:606584|HGNC:HGNC:14406|Ensembl:ENSG00000076201|HPRD:05959|Vega:OTTHUMG00000133520	3	3p21.3	protein tyrosine phosphatase, non-receptor type 23		GO:0005768(endosome)//GO:0005634(nucleus)//GO:0070062(extracellular exosome)//GO:0005737(cytoplasm)//GO:0005654(nucleoplasm)//GO:0005769(early endosome)//GO:0036064(ciliary basal body)//GO:0016023(cytoplasmic, membrane-bounded vesicle)	GO:0019901(protein kinase binding)//GO:0005515(protein binding)//GO:0004725(protein tyrosine phosphatase activity)	GO:0060271(cilium morphogenesis)//GO:0043162(ubiquitin-dependent protein catabolic process via the multivesicular body sorting pathway)//GO:0010633(negative regulation of epithelial cell migration)//GO:1903387(positive regulation of homophilic cell adhesion)//GO:2000643(positive regulation of early endosome to late endosome transport)//GO:0015031(protein transport)//GO:1903393(positive regulation…
RGS11	ENSG00000076344	protein_coding	-	chr16:284544-333003	1.78962	0.307236	5.82493	2.54224	0.0093	0.180162	up	8786	RS11	MIM:603895|HGNC:HGNC:9993|Ensembl:ENSG00000076344|HPRD:04872|Vega:OTTHUMG00000064893	16	16p13.3	regulator of G-protein signaling 11		GO:0005886(plasma membrane)//GO:0005834(heterotrimeric G-protein complex)//GO:0044292(dendrite terminus)//GO:0043234(protein complex)//GO:0005622(intracellular)//GO:0005737(cytoplasm)	GO:0004871(signal transducer activity)//GO:0005096(GTPase activator activity)//GO:0031681(G-protein beta-subunit binding)	GO:0008277(regulation of G-protein coupled receptor protein signaling pathway)//GO:0009968(negative regulation of signal transduction)//GO:0035556(intracellular signal transduction)//GO:0007186(G-protein coupled receptor signaling pathway)//GO:0043547(positive regulation of GTPase activity)
TPD52	ENSG00000076554	protein_coding	-	chr8:80830951-81143467	9.10651	4.48943	2.02844	1.02037	0.02905	0.321305	up	7163	D52|N8L|PC-1|PrLZ|hD52	MIM:604068|HGNC:HGNC:12005|Ensembl:ENSG00000076554|HPRD:04963|Vega:OTTHUMG00000164565	8	8q21.13	tumor protein D52		GO:0005783(endoplasmic reticulum)//GO:0048471(perinuclear region of cytoplasm)//GO:0005737(cytoplasm)	GO:0046982(protein heterodimerization activity)//GO:0005515(protein binding)//GO:0005509(calcium ion binding)//GO:0042803(protein homodimerization activity)	GO:0009653(anatomical structure morphogenesis)//GO:0030183(B cell differentiation)//GO:0046903(secretion)
ACACB	ENSG00000076555	protein_coding	+	chr12:109549022-109706031	145.362	65.1962	2.22961	1.15679	0.04175	0.37711	up	32	ACC2|ACCB|HACC275	MIM:601557|HGNC:HGNC:85|Ensembl:ENSG00000076555|HPRD:07044|Vega:OTTHUMG00000169250	12	12q24.11	acetyl-CoA carboxylase beta	hsa00061(Fatty acid biosynthesis)//hsa00620(Pyruvate metabolism)//hsa00640(Propanoate metabolism)//	GO:0012505(endomembrane system)//GO:0005739(mitochondrion)//GO:0005634(nucleus)//GO:0005741(mitochondrial outer membrane)//GO:0005829(cytosol)	GO:0005524(ATP binding)//GO:0004075(biotin carboxylase activity)//GO:0005515(protein binding)//GO:0046872(metal ion binding)//GO:0003989(acetyl-CoA carboxylase activity)	GO:0006768(biotin metabolic process)//GO:0010629(negative regulation of gene expression)//GO:0043086(negative regulation of catalytic activity)//GO:0006633(fatty acid biosynthetic process)//GO:0031999(negative regulation of fatty acid beta-oxidation)//GO:0051289(protein homotetramerization)//GO:0010906(regulation of glucose metabolic process)//GO:0031667(response to nutrient levels)//GO:0031325(p…
GPATCH1	ENSG00000076650	protein_coding	+	chr19:33571785-33621448	9.52834	4.23333	2.25079	1.17043	0.03685	0.358724	up	55094	ECGP|GPATC1	HGNC:HGNC:24658|Ensembl:ENSG00000076650|HPRD:11008|Vega:OTTHUMG00000180341	19	19q13.11	G-patch domain containing 1		GO:0071013(catalytic step 2 spliceosome)	GO:0003676(nucleic acid binding)	GO:0000398(mRNA splicing, via spliceosome)
MCAM	ENSG00000076706	protein_coding	-	chr11:119179240-119192231	46.5599	16.1426	2.88428	1.52821	0.00155	0.0665643	up	4162	CD146|MUC18	MIM:155735|HGNC:HGNC:6934|Ensembl:ENSG00000076706|HPRD:01120|Vega:OTTHUMG00000166197	11	11q23.3	melanoma cell adhesion molecule		GO:0009897(external side of plasma membrane)//GO:0005886(plasma membrane)//GO:0016021(integral component of membrane)//GO:0005634(nucleus)//GO:0005615(extracellular space)//GO:0005925(focal adhesion)		GO:0061042(vascular wound healing)//GO:0009653(anatomical structure morphogenesis)//GO:0007155(cell adhesion)//GO:0001525(angiogenesis)//GO:0030335(positive regulation of cell migration)//GO:0003094(glomerular filtration)
PAK3	ENSG00000077264	protein_coding	+	chrX:110187512-110470589	0.939898	0.125575	7.48473	2.90395	0.0015	0.0657257	up	5063	MRX30|MRX47|OPHN3|PAK-3|PAK3beta|bPAK|beta-PAK	MIM:300142|HGNC:HGNC:8592|Ensembl:ENSG00000077264|HPRD:02142|Vega:OTTHUMG00000022202	X	Xq23	p21 protein (Cdc42/Rac)-activated kinase 3	hsa04012(ErbB signaling pathway)//hsa04014(Ras signaling pathway)//hsa04360(Axon guidance)//hsa04510(Focal adhesion)//hsa04660(T cell receptor signaling pathway)//hsa04810(Regulation of actin cytoskeleton)//hsa05211(Renal cell carcinoma)	GO:0005768(endosome)//GO:0005886(plasma membrane)//GO:0005737(cytoplasm)//GO:0005829(cytosol)	GO:0004674(protein serine/threonine kinase activity)//GO:0005524(ATP binding)//GO:0004708(MAP kinase kinase activity)//GO:0017124(SH3 domain binding)//GO:0048365(Rac GTPase binding)//GO:0046872(metal ion binding)//GO:0005515(protein binding)	GO:0048013(ephrin receptor signaling pathway)//GO:0061003(positive regulation of dendritic spine morphogenesis)//GO:0030833(regulation of actin filament polymerization)//GO:0016477(cell migration)//GO:0000165(MAPK cascade)//GO:0050808(synapse organization)//GO:0000187(activation of MAPK activity)//GO:0060997(dendritic spine morphogenesis)//GO:0031098(stress-activated protein kinase signaling casc…
LRCH4	ENSG00000077454	protein_coding	-	chr7:100169854-100205798	9.51383	1.60866	5.91415	2.56417	0.0241	0.294959	up	4034	LRN|LRRN1|LRRN4|PP14183	HGNC:HGNC:6691|HPRD:10062	7	7q22	leucine-rich repeats and calponin homology (CH) domain containing 4		GO:0016021(integral component of membrane)//GO:0016605(PML body)	GO:0005515(protein binding)	GO:0007399(nervous system development)
NAALAD2	ENSG00000077616	protein_coding	+	chr11:89864682-89926062	6.64119	1.93438	3.43324	1.77957	0.0034	0.103769	up	10003	GCPIII|GPCIII|NAADALASE2|NAALADASE2	MIM:611636|HGNC:HGNC:14526|Ensembl:ENSG00000077616|HPRD:07494|Vega:OTTHUMG00000166368	11	11q14.3-q21	N-acetylated alpha-linked acidic dipeptidase 2		GO:0016021(integral component of membrane)//GO:0005886(plasma membrane)	GO:0008237(metallopeptidase activity)//GO:0016805(dipeptidase activity)//GO:0050129(N-formylglutamate deformylase activity)//GO:0004180(carboxypeptidase activity)//GO:0008239(dipeptidyl-peptidase activity)//GO:0008236(serine-type peptidase activity)//GO:0046872(metal ion binding)	GO:0006508(proteolysis)//GO:0008652(cellular amino acid biosynthetic process)//GO:0042135(neurotransmitter catabolic process)//GO:0044281(small molecule metabolic process)//GO:0034641(cellular nitrogen compound metabolic process)
ITGA8	ENSG00000077943	protein_coding	-	chr10:15555947-15762124	4.85958	1.8257	2.66176	1.41238	0.00725	0.157416	up	8516	-	MIM:604063|HGNC:HGNC:6144|Ensembl:ENSG00000077943|HPRD:10361|Vega:OTTHUMG00000017733	10	10p13	integrin subunit alpha 8	hsa04151(PI3K-Akt signaling pathway)//hsa04510(Focal adhesion)//hsa04512(ECM-receptor interaction)//hsa04514(Cell adhesion molecules (CAMs))//hsa04810(Regulation of actin cytoskeleton)//hsa05410(Hypertrophic cardiomyopathy (HCM))//hsa05412(Arrhythmogenic right ventricular cardiomyopathy (ARVC))//hsa05414(Dilated cardiomyopathy)	GO:0005886(plasma membrane)//GO:0045177(apical part of cell)//GO:0043204(perikaryon)//GO:0009986(cell surface)//GO:0014069(postsynaptic density)//GO:0008305(integrin complex)//GO:0034678(integrin alpha8-beta1 complex)//GO:0005783(endoplasmic reticulum)//GO:0032591(dendritic spine membrane)//GO:0005925(focal adhesion)	GO:0046872(metal ion binding)	GO:0042472(inner ear morphogenesis)//GO:0001656(metanephros development)//GO:0030511(positive regulation of transforming growth factor beta receptor signaling pathway)//GO:2000721(positive regulation of transcription from RNA polymerase II promoter involved in smooth muscle cell differentiation)//GO:0030030(cell projection organization)//GO:0007420(brain development)//GO:0045184(establishment of …
LAMP3	ENSG00000078081	protein_coding	-	chr3:182840000-182881627	6.6568	0.807443	8.24432	3.0434	0.00175	0.0718166	up	27074	CD208|DC LAMP|DC-LAMP|DCLAMP|LAMP|LAMP-3|TSC403	MIM:605883|HGNC:HGNC:14582|Ensembl:ENSG00000078081|HPRD:12062|Vega:OTTHUMG00000158387	3	3q26.3-q27	lysosomal associated membrane protein 3	hsa04142(Lysosome)	GO:0005765(lysosomal membrane)//GO:0016020(membrane)//GO:0016021(integral component of membrane)//GO:0097233(alveolar lamellar body membrane)		GO:0002250(adaptive immune response)//GO:0008283(cell proliferation)
ADCY2	ENSG00000078295	protein_coding	+	chr5:7396320-7830194	3.30062	0.832086	3.96667	1.98793	0.01655	0.243908	up	108	AC2|HBAC2	MIM:103071|HGNC:HGNC:233|Ensembl:ENSG00000078295|HPRD:00052|Vega:OTTHUMG00000090476	5	5p15.3	adenylate cyclase 2 (brain)	hsa00230(Purine metabolism)//hsa04015(Rap1 signaling pathway)//hsa04020(Calcium signaling pathway)//hsa04022(cGMP-PKG signaling pathway)//hsa04024(cAMP signaling pathway)//hsa04062(Chemokine signaling pathway)//	GO:0005886(plasma membrane)//GO:0005887(integral component of plasma membrane)//GO:0016020(membrane)//GO:0030425(dendrite)//GO:0016021(integral component of membrane)//GO:0045121(membrane raft)//GO:0005622(intracellular)//GO:0005737(cytoplasm)	GO:0008179(adenylate cyclase binding)//GO:0005524(ATP binding)//GO:0016849(phosphorus-oxygen lyase activity)//GO:0046982(protein heterodimerization activity)//GO:0000287(magnesium ion binding)//GO:0000166(nucleotide binding)//GO:0030145(manganese ion binding)//GO:0004016(adenylate cyclase activity)	GO:0009190(cyclic nucleotide biosynthetic process)//GO:0006171(cAMP biosynthetic process)//GO:0003091(renal water homeostasis)//GO:0006112(energy reserve metabolic process)//GO:0007193(adenylate cyclase-inhibiting G-protein coupled receptor signaling pathway)//GO:1904322(cellular response to forskolin)//GO:0007268(synaptic transmission)//GO:0055085(transmembrane transport)//GO:0007189(adenylate c…
RUNX1T1	ENSG00000079102	protein_coding	-	chr8:92967202-93115514	51.699	22.2583	2.32268	1.21579	0.00375	0.109791	up	862	AML1-MTG8|AML1T1|CBFA2T1|CDR|ETO|MTG8|ZMYND2	MIM:133435|HGNC:HGNC:1535|Ensembl:ENSG00000079102|HPRD:00590|Vega:OTTHUMG00000164066	8	8q22	runt related transcription factor 1; translocated to, 1 (cyclin D related)	hsa05200(Pathways in cancer)//hsa05202(Transcriptional misregulation in cancer)//hsa05221(Acute myeloid leukemia)	GO:0005654(nucleoplasm)//GO:0005634(nucleus)//GO:0005739(mitochondrion)//GO:0005737(cytoplasm)//GO:0016363(nuclear matrix)	GO:0042803(protein homodimerization activity)//GO:0003700(transcription factor activity, sequence-specific DNA binding)//GO:0042802(identical protein binding)//GO:0003714(transcription corepressor activity)//GO:0046872(metal ion binding)//GO:0005515(protein binding)//GO:0003677(DNA binding)	GO:0051101(regulation of DNA binding)//GO:0006351(transcription, DNA-templated)//GO:0045599(negative regulation of fat cell differentiation)//GO:0006091(generation of precursor metabolites and energy)//GO:0045892(negative regulation of transcription, DNA-templated)//GO:0045444(fat cell differentiation)
OSBPL6	ENSG00000079156	protein_coding	+	chr2:179059207-179264160	1.4401	0.236586	6.08699	2.60573	0.0083	0.16977	up	114880	ORP6	MIM:606734|HGNC:HGNC:16388|Ensembl:ENSG00000079156|HPRD:09476|Vega:OTTHUMG00000132579	2	2q32.1	oxysterol binding protein like 6		GO:0031965(nuclear membrane)//GO:0005886(plasma membrane)//GO:0005789(endoplasmic reticulum membrane)//GO:0097038(perinuclear endoplasmic reticulum)//GO:0005829(cytosol)	GO:0008289(lipid binding)//GO:0005515(protein binding)	GO:0006869(lipid transport)
SP140	ENSG00000079263	protein_coding	+	chr2:230990025-231268447	8.19308	2.15419	3.80332	1.92726	0.038	0.364076	up	11262	LYSP100|LYSP100-A|LYSP100-B	MIM:608602|HGNC:HGNC:17133|Ensembl:ENSG00000079263|HPRD:09780|Vega:OTTHUMG00000153670	2	2q37.1	SP140 nuclear body protein		GO:0005635(nuclear envelope)//GO:0005739(mitochondrion)//GO:0016605(PML body)//GO:0005730(nucleolus)//GO:0005654(nucleoplasm)//GO:0005634(nucleus)	GO:0008270(zinc ion binding)//GO:0005515(protein binding)//GO:0003677(DNA binding)//GO:0003700(transcription factor activity, sequence-specific DNA binding)	GO:0006952(defense response)//GO:0006355(regulation of transcription, DNA-templated)
TNS1	ENSG00000079308	protein_coding	-	chr2:218664511-218867718	274.997	108.453	2.53564	1.34235	0.0111	0.196769	up	7145	MST091|MST122|MST127|MSTP091|MSTP122|MSTP127|MXRA6|PPP1R155|TNS	MIM:600076|HGNC:HGNC:11973|Ensembl:ENSG00000079308|HPRD:02512|Vega:OTTHUMG00000133056	2	2q35-q36	tensin 1		GO:0009986(cell surface)//GO:0005622(intracellular)//GO:0005925(focal adhesion)//GO:0005856(cytoskeleton)//GO:0005737(cytoplasm)	GO:0044822(poly(A) RNA binding)//GO:0005515(protein binding)//GO:0003779(actin binding)	GO:0035556(intracellular signal transduction)//GO:0010761(fibroblast migration)//GO:0007044(cell-substrate junction assembly)
REXO1	ENSG00000079313	protein_coding	-	chr19:1815247-1848452	6.67139	1.24375	5.36397	2.4233	0.0333	0.342003	up	57455	ELOABP1|EloA-BP1|REX1|TCEB3BP1	MIM:609614|HGNC:HGNC:24616|Ensembl:ENSG00000079313|HPRD:15478|Vega:OTTHUMG00000179991	19	19p13.3	REX1, RNA exonuclease 1 homolog	hsa03008(Ribosome biogenesis in eukaryotes)	GO:0005634(nucleus)	GO:0003676(nucleic acid binding)//GO:0004527(exonuclease activity)	GO:0090305(nucleic acid phosphodiester bond hydrolysis)
CIC	ENSG00000079432	protein_coding	+	chr19:42772688-42799949	4.5921	2.01294	2.28129	1.18985	0.0386	0.366927	up	23152	-	MIM:612082|HGNC:HGNC:14214|Ensembl:ENSG00000079432|HPRD:10831|Vega:OTTHUMG00000182794	19	19q13.2	capicua transcriptional repressor		GO:0005634(nucleus)	GO:0003682(chromatin binding)//GO:0005515(protein binding)//GO:0003677(DNA binding)	GO:0048286(lung alveolus development)//GO:0006351(transcription, DNA-templated)//GO:0000122(negative regulation of transcription from RNA polymerase II promoter)
LIPE	ENSG00000079435	protein_coding	-	chr19:42901279-43156507	41.7532	6.04904	6.90246	2.78711	0.0045	0.123027	up	3991	AOMS4|FPLD6|HSL|LHS	MIM:151750|HGNC:HGNC:6621|Ensembl:ENSG00000079435|HPRD:01062|Vega:OTTHUMG00000182814	19	19q13.2	lipase E, hormone sensitive type	hsa04024(cAMP signaling pathway)//hsa04152(AMPK signaling pathway)//hsa04910(Insulin signaling pathway)//hsa04923(Regulation of lipolysis in adipocytes)//	GO:0005811(lipid particle)//GO:0005901(caveola)//GO:0005829(cytosol)	GO:0033878(hormone-sensitive lipase activity)//GO:0019901(protein kinase binding)//GO:0004806(triglyceride lipase activity)//GO:0016298(lipase activity)//GO:0005515(protein binding)//GO:0016787(hydrolase activity)	GO:0008152(metabolic process)//GO:0044281(small molecule metabolic process)//GO:0016042(lipid catabolic process)//GO:0006468(protein phosphorylation)//GO:0042758(long-chain fatty acid catabolic process)//GO:0008203(cholesterol metabolic process)//GO:0046340(diacylglycerol catabolic process)//GO:0019433(triglyceride catabolic process)
OPHN1	ENSG00000079482	protein_coding	-	chrX:67262185-67653755	13.8314	5.23351	2.64286	1.4021	0.00155	0.0665643	up	4983	ARHGAP41|MRX60|OPN1	MIM:300127|HGNC:HGNC:8148|Ensembl:ENSG00000079482|HPRD:02130|Vega:OTTHUMG00000021744	X	Xq12	oligophrenin 1		GO:0043195(terminal bouton)//GO:0015629(actin cytoskeleton)//GO:0030054(cell junction)//GO:0043197(dendritic spine)//GO:0005829(cytosol)	GO:0005543(phospholipid binding)//GO:0005096(GTPase activator activity)//GO:0035255(ionotropic glutamate receptor binding)//GO:0003779(actin binding)	GO:0007411(axon guidance)//GO:0030100(regulation of endocytosis)//GO:0007264(small GTPase mediated signal transduction)//GO:0043547(positive regulation of GTPase activity)//GO:1901799(negative regulation of proteasomal protein catabolic process)//GO:0051966(regulation of synaptic transmission, glutamatergic)//GO:0030036(actin cytoskeleton organization)//GO:0007399(nervous system development)//GO:…
PTPRH	ENSG00000080031	protein_coding	-	chr19:55692615-55720874	1.20249	0.325666	3.69243	1.88457	0.0437	0.384176	up	5794	R-PTP-H|SAP1	MIM:602510|HGNC:HGNC:9672|Ensembl:ENSG00000080031|HPRD:03942|Vega:OTTHUMG00000180701	19	19q13.4	protein tyrosine phosphatase, receptor type H		GO:0005887(integral component of plasma membrane)//GO:0005737(cytoplasm)	GO:0005515(protein binding)//GO:0005001(transmembrane receptor protein tyrosine phosphatase activity)	GO:0006915(apoptotic process)//GO:0006470(protein dephosphorylation)//GO:0035335(peptidyl-tyrosine dephosphorylation)
EPHA6	ENSG00000080224	protein_coding	+	chr3:96533424-97471304	7.60838	2.34001	3.25142	1.70107	0.03975	0.371244	up	285220	EHK-2|EHK2|EK12|EPA6|HEK12|PRO57066	MIM:600066|HGNC:HGNC:19296|Ensembl:ENSG00000080224|Vega:OTTHUMG00000159208	3	3q11.2	EPH receptor A6	hsa04360(Axon guidance)	GO:0005654(nucleoplasm)//GO:0016021(integral component of membrane)//GO:0005575(cellular_component)//GO:0005887(integral component of plasma membrane)//GO:0005886(plasma membrane)	GO:0005003(ephrin receptor activity)//GO:0005524(ATP binding)//GO:0003674(molecular_function)//GO:0004713(protein tyrosine kinase activity)//GO:0004672(protein kinase activity)	GO:0018108(peptidyl-tyrosine phosphorylation)//GO:0006468(protein phosphorylation)//GO:0007411(axon guidance)//GO:0008150(biological_process)//GO:0048013(ephrin receptor signaling pathway)
SLC4A4	ENSG00000080493	protein_coding	+	chr4:72053002-72437804	4.98921	2.25303	2.21444	1.14694	0.03825	0.365569	up	8671	HNBC1|KNBC|NBC1|NBC2|NBCe1-A|SLC4A5|hhNMC|pNBC	MIM:603345|HGNC:HGNC:11030|Ensembl:ENSG00000080493|HPRD:04516|Vega:OTTHUMG00000129907	4	4q21	solute carrier family 4 (sodium bicarbonate cotransporter), member 4	hsa04964(Proximal tubule bicarbonate reclamation)//hsa04972(Pancreatic secretion)//hsa04976(Bile secretion)	GO:0016323(basolateral plasma membrane)//GO:0005886(plasma membrane)//GO:0005887(integral component of plasma membrane)//GO:0070062(extracellular exosome)	GO:0008510(sodium:bicarbonate symporter activity)//GO:0005515(protein binding)//GO:0005452(inorganic anion exchanger activity)	GO:0035725(sodium ion transmembrane transport)//GO:0015701(bicarbonate transport)//GO:0098656(anion transmembrane transport)//GO:0006814(sodium ion transport)//GO:0055085(transmembrane transport)//GO:0006810(transport)//GO:0006811(ion transport)
PKP1	ENSG00000081277	protein_coding	+	chr1:201252579-201302121	3.26102	1.15425	2.82523	1.49837	0.0342	0.34648	up	5317	B6P	MIM:601975|HGNC:HGNC:9023|Ensembl:ENSG00000081277|HPRD:03579|Vega:OTTHUMG00000035729	1	1q32	plakophilin 1		GO:0005886(plasma membrane)//GO:0070062(extracellular exosome)//GO:0043231(intracellular membrane-bounded organelle)//GO:0030057(desmosome)//GO:0005882(intermediate filament)//GO:0005654(nucleoplasm)//GO:0005634(nucleus)	GO:0004871(signal transducer activity)//GO:0019215(intermediate filament binding)//GO:0030280(structural constituent of epidermis)//GO:0005515(protein binding)//GO:0005521(lamin binding)	GO:0006921(cellular component disassembly involved in execution phase of apoptosis)//GO:0045110(intermediate filament bundle assembly)//GO:0007155(cell adhesion)//GO:0012501(programmed cell death)//GO:0007275(multicellular organism development)//GO:0016337(single organismal cell-cell adhesion)//GO:0006915(apoptotic process)//GO:0007165(signal transduction)
AACS	ENSG00000081760	protein_coding	+	chr12:125549924-125627873	7.79328	3.43657	2.26775	1.18126	0.02615	0.306335	up	65985	ACSF1|SUR-5	MIM:614364|HGNC:HGNC:21298|Ensembl:ENSG00000081760|HPRD:12391|Vega:OTTHUMG00000168550	12	12q24.31	acetoacetyl-CoA synthetase	hsa00280(Valine, leucine and isoleucine degradation)//hsa00650(Butanoate metabolism)	GO:0005829(cytosol)	GO:0005524(ATP binding)//GO:0005515(protein binding)//GO:0047760(butyrate-CoA ligase activity)//GO:0030729(acetoacetate-CoA ligase activity)	GO:0042594(response to starvation)//GO:0044255(cellular lipid metabolic process)//GO:0060612(adipose tissue development)//GO:0034201(response to oleic acid)//GO:0042493(response to drug)//GO:0032024(positive regulation of insulin secretion)//GO:0046951(ketone body biosynthetic process)//GO:0001889(liver development)//GO:0044281(small molecule metabolic process)//GO:0046950(cellular ketone body me…
PCDHB4	ENSG00000081818	protein_coding	+	chr5:140501580-140505201	2.28057	0.394999	5.7736	2.52947	0.0062	0.145524	up	56131	PCDH-BETA4	MIM:606330|HGNC:HGNC:8689|Ensembl:ENSG00000081818|HPRD:07559|Vega:OTTHUMG00000129617	5	5q31	protocadherin beta 4		GO:0005886(plasma membrane)//GO:0005887(integral component of plasma membrane)//GO:0016021(integral component of membrane)//GO:0005737(cytoplasm)//GO:0045111(intermediate filament cytoskeleton)	GO:0005509(calcium ion binding)	GO:0007416(synapse assembly)//GO:0007156(homophilic cell adhesion via plasma membrane adhesion molecules)//GO:0007268(synaptic transmission)//GO:0007155(cell adhesion)//GO:0007399(nervous system development)//GO:0016339(calcium-dependent cell-cell adhesion via plasma membrane cell adhesion molecules)
PGR	ENSG00000082175	protein_coding	-	chr11:100900354-101080322	3.47673	1.3935	2.49497	1.31902	0.00195	0.0767778	up	5241	NR3C3|PR	MIM:607311|HGNC:HGNC:8910|Ensembl:ENSG00000082175|HPRD:07077|Vega:OTTHUMG00000167531	11	11q22-q23	progesterone receptor	hsa04114(Oocyte meiosis)//hsa04914(Progesterone-mediated oocyte maturation)	GO:0005654(nucleoplasm)//GO:0005634(nucleus)//GO:0005741(mitochondrial outer membrane)	GO:0004879(RNA polymerase II transcription factor activity, ligand-activated sequence-specific DNA binding)//GO:0008270(zinc ion binding)//GO:0019899(enzyme binding)//GO:0003700(transcription factor activity, sequence-specific DNA binding)//GO:0005102(receptor binding)//GO:0043565(sequence-specific DNA binding)//GO:0003707(steroid hormone receptor activity)//GO:0000978(RNA polymerase II core prom…	GO:0010629(negative regulation of gene expression)//GO:0060748(tertiary branching involved in mammary gland duct morphogenesis)//GO:0010467(gene expression)//GO:0043401(steroid hormone mediated signaling pathway)//GO:0002070(epithelial cell maturation)//GO:0001542(ovulation from ovarian follicle)//GO:0007267(cell-cell signaling)//GO:0006351(transcription, DNA-templated)//GO:0006367(transcription …
DOPEY1	ENSG00000083097	protein_coding	+	chr6:83777384-83908651	40.83	18.7932	2.1726	1.11942	0.0407	0.373183	up	23033	DOP1|KIAA1117|dJ202D23.2	MIM:616823|HGNC:HGNC:21194|Ensembl:ENSG00000083097|HPRD:10022|Vega:OTTHUMG00000016365	6	6q15	dopey family member 1		GO:0000139(Golgi membrane)		GO:0006895(Golgi to endosome transport)//GO:0015031(protein transport)//GO:0007029(endoplasmic reticulum organization)
P2RX5	ENSG00000083454	protein_coding	-	chr17:3566195-3599698	2.35652	0.426473	5.5256	2.46613	0.02915	0.321495	up	5026	LRH-1|P2X5|P2X5R	MIM:602836|HGNC:HGNC:8536|Ensembl:ENSG00000083454|HPRD:09110|Vega:OTTHUMG00000090700	17	17p13.3	purinergic receptor P2X 5	hsa04020(Calcium signaling pathway)//hsa04080(Neuroactive ligand-receptor interaction)	GO:0005887(integral component of plasma membrane)//GO:0005737(cytoplasm)//GO:0005639(integral component of nuclear inner membrane)	GO:0005524(ATP binding)//GO:0005216(ion channel activity)//GO:0004931(extracellular ATP-gated cation channel activity)//GO:0004888(transmembrane signaling receptor activity)//GO:0001614(purinergic nucleotide receptor activity)	GO:0050850(positive regulation of calcium-mediated signaling)//GO:0033198(response to ATP)//GO:0098779(mitophagy in response to mitochondrial depolarization)//GO:0010524(positive regulation of calcium ion transport into cytosol)//GO:0035590(purinergic nucleotide receptor signaling pathway)//GO:0007399(nervous system development)//GO:0098655(cation transmembrane transport)//GO:0006810(transport)//…
APOB	ENSG00000084674	protein_coding	-	chr2:21224300-21266945	5.57599	0.878813	6.34491	2.6656	0.0002	0.0161758	up	338	FLDB|LDLCQ4|apoB-100|apoB-48	MIM:107730|HGNC:HGNC:603|Ensembl:ENSG00000084674|HPRD:00133|Vega:OTTHUMG00000090785	2	2p24-p23	apolipoprotein B	hsa04975(Fat digestion and absorption)//hsa04977(Vitamin digestion and absorption)	GO:0071682(endocytic vesicle lumen)//GO:0005737(cytoplasm)//GO:0034359(mature chylomicron)//GO:0034363(intermediate-density lipoprotein particle)//GO:0010008(endosome membrane)//GO:0015629(actin cytoskeleton)//GO:0005794(Golgi apparatus)//GO:0034361(very-low-density lipoprotein particle)//GO:0042627(chylomicron)//GO:0034362(low-density lipoprotein particle)//GO:0043231(intracellular membrane-boun…	GO:0050750(low-density lipoprotein particle receptor binding)//GO:0005319(lipid transporter activity)//GO:0005515(protein binding)//GO:0017127(cholesterol transporter activity)//GO:0008201(heparin binding)//GO:0035473(lipase binding)//GO:0005543(phospholipid binding)	GO:0010269(response to selenium ion)//GO:0034374(low-density lipoprotein particle remodeling)//GO:0010628(positive regulation of gene expression)//GO:0071379(cellular response to prostaglandin stimulus)//GO:0007283(spermatogenesis)//GO:0009615(response to virus)//GO:0050900(leukocyte migration)//GO:0006766(vitamin metabolic process)//GO:0030317(sperm motility)//GO:0006775(fat-soluble vitamin meta…
GCKR	ENSG00000084734	protein_coding	+	chr2:27719708-27746554	1.02686	0	inf	inf	0.0311	0.33022	up	2646	FGQTL5|GKRP	MIM:600842|HGNC:HGNC:4196|Ensembl:ENSG00000084734|HPRD:02909|Vega:OTTHUMG00000128426	2	2p23	glucokinase (hexokinase 4) regulator		GO:0005654(nucleoplasm)//GO:0005739(mitochondrion)//GO:0005737(cytoplasm)//GO:0005829(cytosol)	GO:0019904(protein domain specific binding)//GO:0016301(kinase activity)//GO:0019899(enzyme binding)//GO:0030246(carbohydrate binding)//GO:0070095(fructose-6-phosphate binding)//GO:0004857(enzyme inhibitor activity)//GO:0005515(protein binding)	GO:0000060(protein import into nucleus, translocation)//GO:0015758(glucose transport)//GO:0044281(small molecule metabolic process)//GO:0070328(triglyceride homeostasis)//GO:0001678(cellular glucose homeostasis)//GO:0033132(negative regulation of glucokinase activity)//GO:0016310(phosphorylation)//GO:0005975(carbohydrate metabolic process)//GO:0010827(regulation of glucose transport)//GO:0055085(…
BCORL1	ENSG00000085185	protein_coding	+	chrX:129115082-129192058	2.64127	0.879393	3.00351	1.58665	0.0118	0.202878	up	63035	BCoR-L1|CXorf10	MIM:300688|HGNC:HGNC:25657|Ensembl:ENSG00000085185|HPRD:06517|Vega:OTTHUMG00000022379	X	Xq25-q26.1	BCL6 corepressor-like 1		GO:0005654(nucleoplasm)//GO:0005886(plasma membrane)//GO:0005737(cytoplasm)		GO:0016568(chromatin modification)//GO:0006351(transcription, DNA-templated)//GO:0006355(regulation of transcription, DNA-templated)
WNT11	ENSG00000085741	protein_coding	-	chr11:75897368-75921780	4.06077	1.41631	2.86716	1.51962	0.02245	0.283156	up	7481	HWNT11	MIM:603699|HGNC:HGNC:12776|Ensembl:ENSG00000085741|HPRD:04741|Vega:OTTHUMG00000165264	11	11q13.5	wingless-type MMTV integration site family member 11	hsa04310(Wnt signaling pathway)//hsa04340(Hedgehog signaling pathway)//hsa04390(Hippo signaling pathway)//hsa04550(Signaling pathways regulating pluripotency of stem cells)//hsa04916(Melanogenesis)//hsa05166(HTLV-I infection)//hsa05200(Pathways in cancer)//hsa05205(Proteoglycans in cancer)//hsa05217(Basal cell carcinoma)	GO:0005578(proteinaceous extracellular matrix)//GO:0005576(extracellular region)//GO:0005615(extracellular space)//GO:0005737(cytoplasm)	GO:0030295(protein kinase activator activity)//GO:0005102(receptor binding)//GO:0044212(transcription regulatory region DNA binding)//GO:0005096(GTPase activator activity)//GO:0005515(protein binding)//GO:0005109(frizzled binding)	GO:0060021(palate development)//GO:0003402(planar cell polarity pathway involved in axis elongation)//GO:0010628(positive regulation of gene expression)//GO:0045165(cell fate commitment)//GO:0001837(epithelial to mesenchymal transition)//GO:0034394(protein localization to cell surface)//GO:0060412(ventricular septum morphogenesis)//GO:0043066(negative regulation of apoptotic process)//GO:0048706(…
NME8	ENSG00000086288	protein_coding	+	chr7:37723398-38065297	1.89037	0	inf	inf	0.00245	0.0867828	up	51314	CILD6|HEL-S-99|NM23-H8|SPTRX2|TXNDC3|sptrx-2	MIM:607421|HGNC:HGNC:16473|Ensembl:ENSG00000086288|HPRD:16243|Vega:OTTHUMG00000023716	7	7p14.1	NME/NM23 family member 8		GO:0097598(sperm cytoplasmic droplet)//GO:0097228(sperm principal piece)//GO:0036157(outer dynein arm)	GO:0008017(microtubule binding)//GO:0004550(nucleoside diphosphate kinase activity)	GO:0042384(cilium assembly)//GO:0030317(sperm motility)//GO:0006165(nucleoside diphosphate phosphorylation)//GO:0006228(UTP biosynthetic process)//GO:0006241(CTP biosynthetic process)//GO:0007283(spermatogenesis)//GO:0034614(cellular response to reactive oxygen species)//GO:0030154(cell differentiation)//GO:0007275(multicellular organism development)//GO:0045454(cell redox homeostasis)//GO:190217…
SH3BP2	ENSG00000087266	protein_coding	+	chr4:2794749-2842825	19.05	8.61063	2.21238	1.1456	0.0021	0.0800847	up	6452	3BP-2|3BP2|CRBM|CRPM|RES4-23	MIM:602104|HGNC:HGNC:10825|Ensembl:ENSG00000087266|HPRD:03657|Vega:OTTHUMG00000160801	4	4p16.3	SH3-domain binding protein 2	hsa04650(Natural killer cell mediated cytotoxicity)		GO:0017124(SH3 domain binding)//GO:0005515(protein binding)//GO:0005070(SH3/SH2 adaptor activity)	GO:0009967(positive regulation of signal transduction)//GO:0007165(signal transduction)
ASAP3	ENSG00000088280	protein_coding	-	chr1:23755055-23811061	17.1274	7.20263	2.37794	1.24971	0.02345	0.290298	up	55616	ACAP4|CENTB6|DDEFL1|UPLC1	MIM:616594|HGNC:HGNC:14987|Ensembl:ENSG00000088280|HPRD:11662|Vega:OTTHUMG00000003234	1	1p36.12	ArfGAP with SH3 domain, ankyrin repeat and PH domain 3	hsa04144(Endocytosis)//hsa04666(Fc gamma R-mediated phagocytosis)	GO:0005737(cytoplasm)//GO:0001726(ruffle)//GO:0005925(focal adhesion)	GO:0005096(GTPase activator activity)//GO:0046872(metal ion binding)//GO:0005515(protein binding)	GO:0051492(regulation of stress fiber assembly)//GO:0016477(cell migration)//GO:0043547(positive regulation of GTPase activity)
PXN	ENSG00000089159	protein_coding	-	chr12:120639093-120703574	24.6141	11.4815	2.14381	1.10018	0.04705	0.394679	up	5829	-	MIM:602505|HGNC:HGNC:9718|Ensembl:ENSG00000089159|Vega:OTTHUMG00000169169	12	12q24.31	paxillin	hsa04062(Chemokine signaling pathway)//hsa04370(VEGF signaling pathway)//hsa04510(Focal adhesion)//hsa04670(Leukocyte transendothelial migration)//hsa04810(Regulation of actin cytoskeleton)//hsa05100(Bacterial invasion of epithelial cells)//hsa05203(Viral carcinogenesis)//hsa05205(Proteoglycans in cancer)	GO:0005886(plasma membrane)//GO:0030027(lamellipodium)//GO:0005938(cell cortex)//GO:0001725(stress fiber)//GO:0005829(cytosol)//GO:0005875(microtubule associated complex)//GO:0005737(cytoplasm)//GO:0005654(nucleoplasm)//GO:0005856(cytoskeleton)//GO:0005925(focal adhesion)	GO:0008270(zinc ion binding)//GO:0008013(beta-catenin binding)//GO:0019901(protein kinase binding)//GO:0017166(vinculin binding)//GO:0005178(integrin binding)//GO:0051435(BH4 domain binding)//GO:0005515(protein binding)	GO:0008360(regulation of cell shape)//GO:0007010(cytoskeleton organization)//GO:0048041(focal adhesion assembly)//GO:0007173(epidermal growth factor receptor signaling pathway)//GO:0060396(growth hormone receptor signaling pathway)//GO:0018108(peptidyl-tyrosine phosphorylation)//GO:0000187(activation of MAPK activity)//GO:0006936(muscle contraction)//GO:0007155(cell adhesion)//GO:0034614(cellular…
CMTM1	ENSG00000089505	protein_coding	+	chr16:66586465-66613040	1.18957	0.000282382	4212.61	12.0405	5e-05	0.00584669	up	113540	CKLFH|CKLFH1|CKLFSF1	MIM:607884|HGNC:HGNC:19172|Ensembl:ENSG00000089505|HPRD:07433|Vega:OTTHUMG00000137502	16	16q21	CKLF like MARVEL transmembrane domain containing 1		GO:0016021(integral component of membrane)//GO:0005615(extracellular space)	GO:0005125(cytokine activity)	GO:0006935(chemotaxis)
ARHGAP4	ENSG00000089820	protein_coding	-	chrX:153126968-153200676	8.33093	2.14647	3.88122	1.95651	0.00625	0.146343	up	393	C1|RGC1|RhoGAP4|SrGAP4|p115	MIM:300023|HGNC:HGNC:674|Ensembl:ENSG00000089820|HPRD:02063|Vega:OTTHUMG00000024226	X	Xq28	Rho GTPase activating protein 4		GO:0030426(growth cone)//GO:0005794(Golgi apparatus)//GO:0005874(microtubule)//GO:0005737(cytoplasm)//GO:0005829(cytosol)	GO:0048365(Rac GTPase binding)//GO:0005096(GTPase activator activity)//GO:0005515(protein binding)//GO:0005070(SH3/SH2 adaptor activity)	GO:0007266(Rho protein signal transduction)//GO:0030517(negative regulation of axon extension)//GO:0030336(negative regulation of cell migration)//GO:0043065(positive regulation of apoptotic process)//GO:0007264(small GTPase mediated signal transduction)//GO:0043547(positive regulation of GTPase activity)//GO:0007010(cytoskeleton organization)//GO:0010764(negative regulation of fibroblast migrati…
LTBP4	ENSG00000090006	protein_coding	+	chr19:41098788-41135725	58.8278	19.3239	3.0443	1.60611	0.005	0.130802	up	8425	ARCL1C|LTBP-4|LTBP4L|LTBP4S	MIM:604710|HGNC:HGNC:6717|Ensembl:ENSG00000090006|HPRD:05274|Vega:OTTHUMG00000182635	19	19q13.1-q13.2	latent transforming growth factor beta binding protein 4		GO:0070062(extracellular exosome)//GO:0005576(extracellular region)//GO:0005623(cell)//GO:0005578(proteinaceous extracellular matrix)//GO:0031012(extracellular matrix)//GO:0005615(extracellular space)	GO:0005024(transforming growth factor beta-activated receptor activity)//GO:0050431(transforming growth factor beta binding)//GO:0005178(integrin binding)//GO:0005539(glycosaminoglycan binding)//GO:0005515(protein binding)//GO:0005509(calcium ion binding)	GO:0030198(extracellular matrix organization)//GO:0030252(growth hormone secretion)//GO:0006457(protein folding)//GO:0030162(regulation of proteolysis)//GO:0007275(multicellular organism development)//GO:0001558(regulation of cell growth)//GO:0007178(transmembrane receptor protein serine/threonine kinase signaling pathway)//GO:0045595(regulation of cell differentiation)//GO:0017015(regulation of …
MUL1	ENSG00000090432	protein_coding	-	chr1:20825942-20834654	3.70838	1.40494	2.63953	1.40028	0.038	0.364076	up	79594	C1orf166|GIDE|MAPL|MULAN|RNF218	MIM:612037|HGNC:HGNC:25762|Ensembl:ENSG00000090432|HPRD:07799|Vega:OTTHUMG00000002838	1	1p36.12	mitochondrial E3 ubiquitin protein ligase 1		GO:0005777(peroxisome)//GO:0016020(membrane)//GO:0030424(axon)//GO:0031307(integral component of mitochondrial outer membrane)//GO:0005739(mitochondrion)//GO:0005654(nucleoplasm)//GO:0005737(cytoplasm)//GO:0043025(neuronal cell body)	GO:0008270(zinc ion binding)//GO:0031625(ubiquitin protein ligase binding)//GO:0004871(signal transducer activity)//GO:0004842(ubiquitin-protein transferase activity)//GO:0019789(SUMO transferase activity)//GO:0042802(identical protein binding)//GO:0016874(ligase activity)//GO:0005515(protein binding)	GO:0043123(positive regulation of I-kappaB kinase/NF-kappaB signaling)//GO:0007257(activation of JUN kinase activity)//GO:0071650(negative regulation of chemokine (C-C motif) ligand 5 production)//GO:0051646(mitochondrion localization)//GO:0010821(regulation of mitochondrion organization)//GO:0060339(negative regulation of type I interferon-mediated signaling pathway)//GO:0045824(negative regulat…
CHRD	ENSG00000090539	protein_coding	+	chr3:183851806-184402546	2.25838	0.271728	8.31116	3.05505	0.025	0.300294	up	8646	-	MIM:603475|HGNC:HGNC:1949|Ensembl:ENSG00000090539|HPRD:04592|Vega:OTTHUMG00000141267	3	3q27	chordin	hsa04350(TGF-beta signaling pathway)	GO:0005615(extracellular space)	GO:0019955(cytokine binding)//GO:0045545(syndecan binding)//GO:0008201(heparin binding)//GO:0005515(protein binding)	GO:0030514(negative regulation of BMP signaling pathway)//GO:0030336(negative regulation of cell migration)//GO:0001702(gastrulation with mouth forming second)//GO:0002053(positive regulation of mesenchymal cell proliferation)//GO:0045785(positive regulation of cell adhesion)//GO:0030900(forebrain development)//GO:0045668(negative regulation of osteoblast differentiation)//GO:0001707(mesoderm for…
EFNB1	ENSG00000090776	protein_coding	+	chrX:68048839-68061990	5.68826	2.04598	2.78022	1.4752	0.01775	0.251126	up	1947	CFND|CFNS|EFB1|EFL3|EPLG2|Elk-L|LERK2	MIM:300035|HGNC:HGNC:3226|Ensembl:ENSG00000090776|HPRD:02072|Vega:OTTHUMG00000021751	X	Xq12	ephrin-B1	hsa04360(Axon guidance)	GO:0005886(plasma membrane)//GO:0005887(integral component of plasma membrane)//GO:0045202(synapse)//GO:0045121(membrane raft)//GO:0070062(extracellular exosome)//GO:0005634(nucleus)//GO:0005737(cytoplasm)	GO:0046875(ephrin receptor binding)//GO:0005515(protein binding)	GO:0007411(axon guidance)//GO:0009880(embryonic pattern specification)//GO:0042102(positive regulation of T cell proliferation)//GO:0048013(ephrin receptor signaling pathway)//GO:0007267(cell-cell signaling)//GO:0007155(cell adhesion)//GO:0031295(T cell costimulation)//GO:0001755(neural crest cell migration)
DTX2	ENSG00000091073	protein_coding	+	chr7:76090992-76135312	4.75247	1.3994	3.39606	1.76386	0.00305	0.097055	up	113878	RNF58	MIM:613141|HGNC:HGNC:15973|Ensembl:ENSG00000091073|HPRD:16841|Vega:OTTHUMG00000162594	7	7q11.23	deltex 2, E3 ubiquitin ligase	hsa04330(Notch signaling pathway)	GO:0031965(nuclear membrane)//GO:0005654(nucleoplasm)//GO:0005737(cytoplasm)	GO:0016874(ligase activity)//GO:0008270(zinc ion binding)//GO:0005515(protein binding)	GO:0007219(Notch signaling pathway)//GO:0016567(protein ubiquitination)
NLRP1	ENSG00000091592	protein_coding	-	chr17:5402746-5522744	21.7696	8.73113	2.49332	1.31807	0.01605	0.240206	up	22861	CARD7|CIDED|CLR17.1|DEFCAP|DEFCAP-L/S|NAC|NALP1|PP1044|SLEV1|VAMAS1	MIM:606636|HGNC:HGNC:14374|Ensembl:ENSG00000091592|HPRD:07364|Vega:OTTHUMG00000132419	17	17p13.2	NLR family, pyrin domain containing 1	hsa04621(NOD-like receptor signaling pathway)	GO:0072558(NLRP1 inflammasome complex)//GO:0005622(intracellular)//GO:0005634(nucleus)//GO:0005829(cytosol)	GO:0005524(ATP binding)//GO:0008656(cysteine-type endopeptidase activator activity involved in apoptotic process)//GO:0019899(enzyme binding)//GO:0005515(protein binding)//GO:0019904(protein domain specific binding)	GO:0035872(nucleotide-binding domain, leucine rich repeat containing receptor signaling pathway)//GO:0051402(neuron apoptotic process)//GO:0045087(innate immune response)//GO:0032495(response to muramyl dipeptide)//GO:0050727(regulation of inflammatory response)//GO:0006954(inflammatory response)//GO:0050718(positive regulation of interleukin-1 beta secretion)//GO:0006919(activation of cysteine-t…
PITPNM3	ENSG00000091622	protein_coding	-	chr17:6347734-6459814	1.02961	0.227353	4.52868	2.17909	0.04325	0.382565	up	83394	ACKR6|CORD5|NIR1|RDGBA3	MIM:608921|HGNC:HGNC:21043|Ensembl:ENSG00000091622|HPRD:07498|Vega:OTTHUMG00000102039	17	17p13	PITPNM family member 3		GO:0005622(intracellular)//GO:0016021(integral component of membrane)//GO:0012505(endomembrane system)	GO:0008289(lipid binding)//GO:0008526(phosphatidylinositol transporter activity)//GO:0005515(protein binding)//GO:0030971(receptor tyrosine kinase binding)//GO:0005509(calcium ion binding)	GO:0006810(transport)//GO:0046488(phosphatidylinositol metabolic process)//GO:0015914(phospholipid transport)
ZFHX4	ENSG00000091656	protein_coding	+	chr8:77316232-77779521	47.3331	16.0628	2.94676	1.55913	0.0234	0.290298	up	79776	ZFH4|ZHF4	MIM:606940|HGNC:HGNC:30939|Ensembl:ENSG00000091656|HPRD:09503|Vega:OTTHUMG00000164557	8	8q21.11	zinc finger homeobox 4		GO:0005634(nucleus)	GO:0043565(sequence-specific DNA binding)//GO:0008270(zinc ion binding)	GO:0006351(transcription, DNA-templated)//GO:0006355(regulation of transcription, DNA-templated)
ESR1	ENSG00000091831	protein_coding	+	chr6:151977825-152958936	5.75806	0.72463	7.94617	2.99026	0.0361	0.355163	up	2099	ER|ESR|ESRA|ESTRR|Era|NR3A1	MIM:133430|HGNC:HGNC:3467|Ensembl:ENSG00000091831|HPRD:00589|Vega:OTTHUMG00000016103	6	6q25.1	estrogen receptor 1	hsa04915(Estrogen signaling pathway)//hsa04917(Prolactin signaling pathway)//hsa04919(Thyroid hormone signaling pathway)//hsa04961(Endocrine and other factor-regulated calcium reabsorption)//hsa05205(Proteoglycans in cancer)	GO:0005886(plasma membrane)//GO:0048471(perinuclear region of cytoplasm)//GO:0043204(perikaryon)//GO:0000790(nuclear chromatin)//GO:0016020(membrane)//GO:0043234(protein complex)//GO:0005794(Golgi apparatus)//GO:0016021(integral component of membrane)//GO:0005829(cytosol)//GO:0005739(mitochondrion)//GO:0030315(T-tubule)//GO:0005654(nucleoplasm)//GO:0035327(transcriptionally active chromatin)//GO:…	GO:0030235(nitric-oxide synthase regulator activity)//GO:0003700(transcription factor activity, sequence-specific DNA binding)//GO:0000978(RNA polymerase II core promoter proximal region sequence-specific DNA binding)//GO:0008134(transcription factor binding)//GO:0038052(RNA polymerase II transcription factor activity, estrogen-activated sequence-specific DNA binding)//GO:0001046(core promoter se…	GO:0071392(cellular response to estradiol stimulus)//GO:0008209(androgen metabolic process)//GO:0046697(decidualization)//GO:0046325(negative regulation of glucose import)//GO:0007204(positive regulation of cytosolic calcium ion concentration)//GO:0060750(epithelial cell proliferation involved in mammary gland duct elongation)//GO:0045893(positive regulation of transcription, DNA-templated)//GO:0…
TYRO3	ENSG00000092445	protein_coding	+	chr15:41849872-41871536	7.50624	1.64142	4.57303	2.19315	0.0053	0.134131	up	7301	BYK|Dtk|Etk-2|RSE|Rek|Sky|Tif	MIM:600341|HGNC:HGNC:12446|HPRD:02641	15	15q15	TYRO3 protein tyrosine kinase		GO:0016021(integral component of membrane)//GO:0005634(nucleus)//GO:0005789(endoplasmic reticulum membrane)//GO:0005887(integral component of plasma membrane)//GO:0005635(nuclear envelope)	GO:0004713(protein tyrosine kinase activity)//GO:0005524(ATP binding)//GO:0046982(protein heterodimerization activity)//GO:0004716(receptor signaling protein tyrosine kinase activity)//GO:0004714(transmembrane receptor protein tyrosine kinase activity)//GO:0043548(phosphatidylinositol 3-kinase binding)//GO:0001618(virus receptor activity)//GO:0005515(protein binding)	GO:0030168(platelet activation)//GO:0007283(spermatogenesis)//GO:0060068(vagina development)//GO:0051250(negative regulation of lymphocyte activation)//GO:0050728(negative regulation of inflammatory response)//GO:0014065(phosphatidylinositol 3-kinase signaling)//GO:0045824(negative regulation of innate immune response)//GO:0070050(neuron cellular homeostasis)//GO:0001779(natural killer cell diffe…
EPB41L4B	ENSG00000095203	protein_coding	-	chr9:111934254-112083244	7.97364	2.51321	3.1727	1.66571	0.00465	0.125363	up	54566	CG1|EHM2	MIM:610340|HGNC:HGNC:19818|Ensembl:ENSG00000095203|HPRD:09940|Vega:OTTHUMG00000020470	9	9q31-q32	erythrocyte membrane protein band 4.1 like 4B		GO:0005923(bicellular tight junction)//GO:0019898(extrinsic component of membrane)//GO:0045177(apical part of cell)//GO:0005856(cytoskeleton)//GO:0005737(cytoplasm)	GO:0008092(cytoskeletal protein binding)//GO:0005200(structural constituent of cytoskeleton)	GO:0010837(regulation of keratinocyte proliferation)//GO:0051549(positive regulation of keratinocyte migration)//GO:0031032(actomyosin structure organization)//GO:0010628(positive regulation of gene expression)//GO:0042060(wound healing)//GO:0045785(positive regulation of cell adhesion)
PTGS1	ENSG00000095303	protein_coding	+	chr9:125132823-125157982	12.4971	5.95458	2.09873	1.06952	0.01525	0.234613	up	5742	COX1|COX3|PCOX1|PES-1|PGG/HS|PGHS-1|PGHS1|PHS1|PTGHS	MIM:176805|HGNC:HGNC:9604|Ensembl:ENSG00000095303|HPRD:07518|Vega:OTTHUMG00000020605	9	9q32-q33.3	prostaglandin-endoperoxide synthase 1 (prostaglandin G/H synthase and cyclooxygenase)	hsa00590(Arachidonic acid metabolism)//	GO:0070062(extracellular exosome)//GO:0005635(nuclear envelope)//GO:0005789(endoplasmic reticulum membrane)//GO:0005794(Golgi apparatus)//GO:0001750(photoreceptor outer segment)//GO:0043231(intracellular membrane-bounded organelle)//GO:0005634(nucleus)//GO:0005737(cytoplasm)	GO:0051213(dioxygenase activity)//GO:0004601(peroxidase activity)//GO:0020037(heme binding)//GO:0008289(lipid binding)//GO:0004666(prostaglandin-endoperoxide synthase activity)//GO:0046872(metal ion binding)	GO:0001516(prostaglandin biosynthetic process)//GO:0006979(response to oxidative stress)//GO:0045907(positive regulation of vasoconstriction)//GO:0051412(response to corticosterone)//GO:0006805(xenobiotic metabolic process)//GO:0019371(cyclooxygenase pathway)//GO:0019369(arachidonic acid metabolic process)//GO:0045987(positive regulation of smooth muscle contraction)//GO:0006629(lipid metabolic p…
SH2D3C	ENSG00000095370	protein_coding	-	chr9:130500595-130541020	4.40076	0.785838	5.60009	2.48545	5e-05	0.00584669	up	10044	CHAT|NSP3|PRO34088|SHEP1	MIM:604722|HGNC:HGNC:16884|Ensembl:ENSG00000095370|HPRD:05284|Vega:OTTHUMG00000020717	9	9q34.11	SH2 domain containing 3C		GO:0016020(membrane)//GO:0005737(cytoplasm)	GO:0005515(protein binding)//GO:0005070(SH3/SH2 adaptor activity)//GO:0005085(guanyl-nucleotide exchange factor activity)	GO:0043547(positive regulation of GTPase activity)//GO:0007254(JNK cascade)//GO:0009967(positive regulation of signal transduction)//GO:0007264(small GTPase mediated signal transduction)
BAMBI	ENSG00000095739	protein_coding	+	chr10:28966270-28971868	3.90093	0.48118	8.10701	3.01917	0.00415	0.117257	up	25805	NMA	MIM:604444|HGNC:HGNC:30251|Ensembl:ENSG00000095739|HPRD:05117|Vega:OTTHUMG00000017874	10	10p12.3-p11.2	BMP and activin membrane-bound inhibitor	hsa04310(Wnt signaling pathway)//hsa04350(TGF-beta signaling pathway)	GO:0005886(plasma membrane)//GO:0016021(integral component of membrane)//GO:0005737(cytoplasm)	GO:0005114(type II transforming growth factor beta receptor binding)//GO:0005109(frizzled binding)	GO:0035413(positive regulation of catenin import into nucleus)//GO:0008284(positive regulation of cell proliferation)//GO:0090263(positive regulation of canonical Wnt signaling pathway)//GO:0008360(regulation of cell shape)//GO:0016477(cell migration)//GO:0030512(negative regulation of transforming growth factor beta receptor signaling pathway)//GO:0032092(positive regulation of protein binding)/…
ITPR3	ENSG00000096433	protein_coding	+	chr6:33588141-33679528	6.51208	3.13089	2.07994	1.05654	0.0341	0.34619	up	3710	IP3R|IP3R3	MIM:147267|HGNC:HGNC:6182|Ensembl:ENSG00000096433|HPRD:00926|Vega:OTTHUMG00000014532	6	6p21	inositol 1,4,5-trisphosphate receptor type 3	hsa04020(Calcium signaling pathway)//hsa04022(cGMP-PKG signaling pathway)//hsa04070(Phosphatidylinositol signaling system)//hsa04114(Oocyte meiosis)//hsa04210(Apoptosis)//hsa04270(Vascular smooth muscle contraction)//hsa04540(Gap junction)//hsa04611(Platelet activation)//hsa04713(Circadian entrainment)//hsa04720(Long-term potentiation)//hsa04723(Retrograde endocannabinoid signaling)//hsa04724(Glu…	GO:0005886(plasma membrane)//GO:0005887(integral component of plasma membrane)//GO:0005640(nuclear outer membrane)//GO:0043235(receptor complex)//GO:0005903(brush border)//GO:0016020(membrane)//GO:0030425(dendrite)//GO:0048471(perinuclear region of cytoplasm)//GO:0005789(endoplasmic reticulum membrane)//GO:0005829(cytosol)//GO:0031095(platelet dense tubular network membrane)//GO:0043209(myelin sh…	GO:0070679(inositol 1,4,5 trisphosphate binding)//GO:0005218()//GO:0005220(inositol 1,4,5-trisphosphate-sensitive calcium-release channel activity)//GO:0035091(phosphatidylinositol binding)//GO:0000822(inositol hexakisphosphate binding)//GO:0005515(protein binding)//GO:0005509(calcium ion binding)//GO:0043533(inositol 1,3,4,5 tetrakisphosphate binding)	GO:0030168(platelet activation)//GO:0051260(protein homooligomerization)//GO:0051291(protein heterooligomerization)//GO:0048016(inositol phosphate-mediated signaling)//GO:0007204(positive regulation of cytosolic calcium ion concentration)//GO:0006112(energy reserve metabolic process)//GO:0050913(sensory perception of bitter taste)//GO:0060402(calcium ion transport into cytosol)//GO:0060291(long-t…
PRTFDC1	ENSG00000099256	protein_coding	-	chr10:25137535-25241533	9.11287	3.18816	2.85834	1.51518	0.0463	0.391603	up	56952	HHGP	MIM:610751|HGNC:HGNC:23333|Ensembl:ENSG00000099256|HPRD:17917|Vega:OTTHUMG00000017829	10	10p12.1	phosphoribosyl transferase domain containing 1		GO:0005829(cytosol)	GO:0000166(nucleotide binding)//GO:0004422(hypoxanthine phosphoribosyltransferase activity)//GO:0000287(magnesium ion binding)//GO:0005515(protein binding)//GO:0042803(protein homodimerization activity)	GO:0032263(GMP salvage)//GO:0046038(GMP catabolic process)//GO:0046100(hypoxanthine metabolic process)//GO:0006178(guanine salvage)//GO:0006168(adenine salvage)//GO:0032264(IMP salvage)
MAST3	ENSG00000099308	protein_coding	+	chr19:18169804-18262502	3.04384	0.984498	3.09176	1.62843	0.006	0.143963	up	23031	-	MIM:612258|HGNC:HGNC:19036|Ensembl:ENSG00000099308|Vega:OTTHUMG00000183418	19	19p13.11	microtubule associated serine/threonine kinase 3		GO:0005622(intracellular)	GO:0005524(ATP binding)//GO:0004674(protein serine/threonine kinase activity)//GO:0000287(magnesium ion binding)//GO:0005515(protein binding)	GO:0035556(intracellular signal transduction)//GO:0007010(cytoskeleton organization)//GO:0018105(peptidyl-serine phosphorylation)
STX1B	ENSG00000099365	protein_coding	-	chr16:31000576-31021949	1.18776	0.144282	8.23221	3.04128	0.03915	0.369262	up	112755	GEFSP9|STX1B1|STX1B2	MIM:601485|HGNC:HGNC:18539|Ensembl:ENSG00000099365|HPRD:18126|Vega:OTTHUMG00000132391	16	16p11.2	syntaxin 1B	hsa04130(SNARE interactions in vesicular transport)//hsa04721(Synaptic vesicle cycle)	GO:0016021(integral component of membrane)//GO:0005815(microtubule organizing center)//GO:0012505(endomembrane system)//GO:0031201(SNARE complex)//GO:0005886(plasma membrane)//GO:0005829(cytosol)//GO:0005819(spindle)//GO:0008021(synaptic vesicle)//GO:0016020(membrane)//GO:0005622(intracellular)//GO:0005634(nucleus)	GO:0000149(SNARE binding)//GO:0005484(SNAP receptor activity)//GO:0019901(protein kinase binding)//GO:0019904(protein domain specific binding)	GO:0010807(regulation of synaptic vesicle priming)//GO:0048278(vesicle docking)//GO:0016081(synaptic vesicle docking)//GO:0017157(regulation of exocytosis)//GO:0061025(membrane fusion)//GO:2000463(positive regulation of excitatory postsynaptic potential)//GO:0016192(vesicle-mediated transport)//GO:0010468(regulation of gene expression)//GO:0006886(intracellular protein transport)//GO:0031629(syna…
ATP5D	ENSG00000099624	protein_coding	+	chr19:1241748-1244824	4.79939	1.11317	4.31147	2.10818	0.0398	0.371244	up	513	-	MIM:603150|HGNC:HGNC:837|Ensembl:ENSG00000099624|HPRD:04397|Vega:OTTHUMG00000180143	19	19p13.3	ATP synthase, H+ transporting, mitochondrial F1 complex, delta subunit	hsa00190(Oxidative phosphorylation)//	GO:0005743(mitochondrial inner membrane)//GO:0005759(mitochondrial matrix)//GO:0045261(proton-transporting ATP synthase complex, catalytic core F(1))//GO:0000275(mitochondrial proton-transporting ATP synthase complex, catalytic core F(1))//GO:0005739(mitochondrion)//GO:0005753(mitochondrial proton-transporting ATP synthase complex)	GO:0022857(transmembrane transporter activity)//GO:0046933(proton-transporting ATP synthase activity, rotational mechanism)//GO:0005524(ATP binding)//GO:0005215(transporter activity)//GO:0043531(ADP binding)//GO:0016887(ATPase activity)//GO:0046961(proton-transporting ATPase activity, rotational mechanism)	GO:0015986(ATP synthesis coupled proton transport)//GO:0044281(small molecule metabolic process)//GO:0046688(response to copper ion)//GO:0006754(ATP biosynthetic process)//GO:0042776(mitochondrial ATP synthesis coupled proton transport)//GO:0044237(cellular metabolic process)//GO:0006119(oxidative phosphorylation)//GO:0022904(respiratory electron transport chain)
CDC34	ENSG00000099804	protein_coding	+	chr19:531713-542097	6.30533	1.25485	5.02478	2.32906	0.011	0.195891	up	997	E2-CDC34|UBC3|UBCH3|UBE2R1	MIM:116948|HGNC:HGNC:1734|Ensembl:ENSG00000099804|HPRD:00306|Vega:OTTHUMG00000180558	19	19p13.3	cell division cycle 34	hsa04120(Ubiquitin mediated proteolysis)//hsa05168(Herpes simplex infection)	GO:0005654(nucleoplasm)//GO:0005634(nucleus)//GO:0005737(cytoplasm)	GO:0031625(ubiquitin protein ligase binding)//GO:0005524(ATP binding)//GO:0004842(ubiquitin-protein transferase activity)//GO:0061631(ubiquitin conjugating enzyme activity)//GO:0061630(ubiquitin protein ligase activity)//GO:0005515(protein binding)	GO:0070936(protein K48-linked ubiquitination)//GO:0090261(positive regulation of inclusion body assembly)//GO:0043525(positive regulation of neuron apoptotic process)//GO:0000082(G1/S transition of mitotic cell cycle)//GO:0016567(protein ubiquitination)//GO:0070848(response to growth factor)//GO:0000209(protein polyubiquitination)//GO:0035458(cellular response to interferon-beta)//GO:0043161(prot…
POLRMT	ENSG00000099821	protein_coding	-	chr19:617222-633597	4.02397	1.22618	3.28172	1.71445	0.02485	0.299791	up	5442	APOLMT|MTRNAP|MTRPOL|h-mtRPOL	MIM:601778|HGNC:HGNC:9200|Ensembl:ENSG00000099821|HPRD:03468|Vega:OTTHUMG00000180611	19	19p13.3	polymerase (RNA) mitochondrial (DNA directed)		GO:0042645(mitochondrial nucleoid)//GO:0005739(mitochondrion)//GO:0005759(mitochondrial matrix)	GO:0044822(poly(A) RNA binding)//GO:0003899(DNA-directed RNA polymerase activity)//GO:0005515(protein binding)//GO:0003677(DNA binding)	GO:0006390(transcription from mitochondrial promoter)//GO:0010467(gene expression)//GO:0006351(transcription, DNA-templated)//GO:0006996(organelle organization)//GO:0007005(mitochondrion organization)//GO:0006391(transcription initiation from mitochondrial promoter)
PALM	ENSG00000099864	protein_coding	+	chr19:708952-748329	6.49763	1.3241	4.9072	2.2949	0.0211	0.274145	up	5064	-	MIM:608134|HGNC:HGNC:8594|Ensembl:ENSG00000099864|HPRD:09734|Vega:OTTHUMG00000181785	19	19p13.3	paralemmin		GO:0005886(plasma membrane)//GO:0005887(integral component of plasma membrane)//GO:0016020(membrane)//GO:0030424(axon)//GO:0097481(neuronal postsynaptic density)//GO:0016323(basolateral plasma membrane)//GO:0043231(intracellular membrane-bounded organelle)//GO:0031527(filopodium membrane)//GO:0032591(dendritic spine membrane)//GO:0016327(apicolateral plasma membrane)//GO:0005654(nucleoplasm)//GO:…	GO:0031750(D3 dopamine receptor binding)//GO:0005515(protein binding)	GO:0060160(negative regulation of dopamine receptor signaling pathway)//GO:0008360(regulation of cell shape)//GO:0007010(cytoskeleton organization)//GO:0007194(negative regulation of adenylate cyclase activity)//GO:0072661(protein targeting to plasma membrane)//GO:0060074(synapse maturation)//GO:0051491(positive regulation of filopodium assembly)//GO:0060999(positive regulation of dendritic spine…
MKNK2	ENSG00000099875	protein_coding	-	chr19:2037469-2051243	15.8427	6.16369	2.57032	1.36195	0.0444	0.386652	up	2872	GPRK7|MNK2	MIM:605069|HGNC:HGNC:7111|Ensembl:ENSG00000099875|HPRD:05459|Vega:OTTHUMG00000180020	19	19p13.3	MAP kinase interacting serine/threonine kinase 2	hsa04010(MAPK signaling pathway)//hsa04066(HIF-1 signaling pathway)//hsa04910(Insulin signaling pathway)	GO:0005654(nucleoplasm)//GO:0005634(nucleus)//GO:0016605(PML body)//GO:0005737(cytoplasm)//GO:0005730(nucleolus)	GO:0004674(protein serine/threonine kinase activity)//GO:0004672(protein kinase activity)//GO:0005516(calmodulin binding)//GO:0004683(calmodulin-dependent protein kinase activity)//GO:0009931(calcium-dependent protein serine/threonine kinase activity)//GO:0005524(ATP binding)//GO:0046872(metal ion binding)//GO:0005515(protein binding)	GO:0006468(protein phosphorylation)//GO:0046777(protein autophosphorylation)//GO:0006417(regulation of translation)//GO:0030097(hemopoiesis)//GO:0007166(cell surface receptor signaling pathway)//GO:0097192(extrinsic apoptotic signaling pathway in absence of ligand)//GO:0035556(intracellular signal transduction)//GO:0018105(peptidyl-serine phosphorylation)//GO:0071243(cellular response to arsenic-…
MED15	ENSG00000099917	protein_coding	+	chr22:20850199-20946505	14.2083	6.31743	2.24907	1.16933	0.0032	0.0998637	up	51586	ARC105|CAG7A|CTG7A|PCQAP|TIG-1|TIG1|TNRC7	MIM:607372|HGNC:HGNC:14248|Ensembl:ENSG00000099917|HPRD:12117|Vega:OTTHUMG00000150810	22	22q11.2	mediator complex subunit 15		GO:0016592(mediator complex)//GO:0005654(nucleoplasm)//GO:0005634(nucleus)//GO:0005737(cytoplasm)//GO:0016020(membrane)	GO:0005515(protein binding)//GO:0001104(RNA polymerase II transcription cofactor activity)	GO:0006357(regulation of transcription from RNA polymerase II promoter)//GO:0010467(gene expression)//GO:0006367(transcription initiation from RNA polymerase II promoter)//GO:0019827(stem cell population maintenance)
DDT	ENSG00000099977	protein_coding	-	chr22:24309088-24326106	2.76358	0.614016	4.50083	2.17019	0.04315	0.382565	up	1652	DDCT	MIM:602750|HGNC:HGNC:2732|Ensembl:ENSG00000099977|HPRD:04126|Vega:OTTHUMG00000150798	22	22q11.23	D-dopachrome tautomerase		GO:0070062(extracellular exosome)//GO:0005737(cytoplasm)	GO:0033981(D-dopachrome decarboxylase activity)//GO:0004167(dopachrome isomerase activity)	GO:0042438(melanin biosynthetic process)
CABIN1	ENSG00000099991	protein_coding	+	chr22:24407641-24574596	16.1076	7.64803	2.10611	1.07458	0.0199	0.265666	up	23523	CAIN|KB-318B8.7|PPP3IN	MIM:604251|HGNC:HGNC:24187|Ensembl:ENSG00000099991|HPRD:10369|Vega:OTTHUMG00000150797	22	22q11.23	calcineurin binding protein 1		GO:0005654(nucleoplasm)//GO:0005634(nucleus)//GO:0005737(cytoplasm)//GO:0016235(aggresome)	GO:0031491(nucleosome binding)//GO:0030346(protein phosphatase 2B binding)//GO:0004864(protein phosphatase inhibitor activity)//GO:0019904(protein domain specific binding)	GO:0043086(negative regulation of catalytic activity)//GO:0006336(DNA replication-independent nucleosome assembly)//GO:0014823(response to activity)//GO:0060548(negative regulation of cell death)//GO:0016568(chromatin modification)//GO:0007166(cell surface receptor signaling pathway)
UPB1	ENSG00000100024	protein_coding	+	chr22:24666785-24924358	0.912678	0.0287421	31.7541	4.98887	0.00515	0.133111	up	51733	BUP1	MIM:606673|HGNC:HGNC:16297|Ensembl:ENSG00000100024|HPRD:09451|Vega:OTTHUMG00000150749	22	22q11.2	ureidopropionase, beta	hsa00240(Pyrimidine metabolism)//hsa00410(beta-Alanine metabolism)//hsa00770(Pantothenate and CoA biosynthesis)//hsa00983(Drug metabolism - other enzymes)//	GO:0070062(extracellular exosome)//GO:0005829(cytosol)	GO:0003837(beta-ureidopropionase activity)//GO:0046872(metal ion binding)	GO:0055086(nucleobase-containing small molecule metabolic process)//GO:0044281(small molecule metabolic process)//GO:0019483(beta-alanine biosynthetic process)//GO:0006206(pyrimidine nucleobase metabolic process)//GO:0046135(pyrimidine nucleoside catabolic process)
TOP3B	ENSG00000100038	protein_coding	-	chr22:22311396-22337213	14.4523	4.58305	3.15343	1.65692	0.03115	0.33022	up	8940	TOP3B1	MIM:603582|HGNC:HGNC:11993|Ensembl:ENSG00000100038|HPRD:04662|Vega:OTTHUMG00000167438	22	22q11.22	topoisomerase (DNA) III beta	hsa03440(Homologous recombination)//hsa03460(Fanconi anemia pathway)	GO:0005634(nucleus)//GO:0000793(condensed chromosome)	GO:0044822(poly(A) RNA binding)//GO:0003917(DNA topoisomerase type I activity)//GO:0005515(protein binding)//GO:0003677(DNA binding)//GO:0003916(DNA topoisomerase activity)	GO:0007059(chromosome segregation)//GO:0006265(DNA topological change)
CARD10	ENSG00000100065	protein_coding	-	chr22:37865100-37915549	0.997757	0.0580755	17.1804	4.10269	0.0454	0.389077	up	29775	BIMP1|CARMA3	MIM:607209|HGNC:HGNC:16422|Ensembl:ENSG00000100065|HPRD:06233|Vega:OTTHUMG00000150592	22	22q13.1	caspase recruitment domain family member 10		GO:0032449(CBM complex)//GO:0005737(cytoplasm)	GO:0005515(protein binding)//GO:0030159(receptor signaling complex scaffold activity)	GO:0007250(activation of NF-kappaB-inducing kinase activity)//GO:0006461(protein complex assembly)//GO:0042981(regulation of apoptotic process)
PIK3IP1	ENSG00000100100	protein_coding	-	chr22:31677578-31742218	19.497	8.46204	2.30406	1.20418	0.02755	0.314758	up	113791	HGFL|hHGFL(S)	HGNC:HGNC:24942|Ensembl:ENSG00000100100|HPRD:17518|Vega:OTTHUMG00000151256	22	22q12.2	phosphoinositide-3-kinase interacting protein 1		GO:0005886(plasma membrane)//GO:0070062(extracellular exosome)//GO:0016021(integral component of membrane)	GO:0036313(phosphatidylinositol 3-kinase catalytic subunit binding)//GO:0005515(protein binding)//GO:0004252(serine-type endopeptidase activity)	GO:0006508(proteolysis)//GO:0014067(negative regulation of phosphatidylinositol 3-kinase signaling)//GO:0043553(negative regulation of phosphatidylinositol 3-kinase activity)
PICK1	ENSG00000100151	protein_coding	+	chr22:38452317-38471708	10.1215	0.622685	16.2546	4.02278	5e-05	0.00584669	up	9463	PICK|PRKCABP	MIM:605926|HGNC:HGNC:9394|Ensembl:ENSG00000100151|HPRD:16176|Vega:OTTHUMG00000151159	22	22q13.1	protein interacting with PRKCA 1		GO:0005886(plasma membrane)//GO:0043005(neuron projection)//GO:0048471(perinuclear region of cytoplasm)//GO:0005794(Golgi apparatus)//GO:0045211(postsynaptic membrane)//GO:0045202(synapse)//GO:0097481(neuronal postsynaptic density)//GO:0005739(mitochondrion)//GO:0030054(cell junction)//GO:0030666(endocytic vesicle membrane)//GO:0042734(presynaptic membrane)//GO:0005856(cytoskeleton)//GO:0005737(c…	GO:0019904(protein domain specific binding)//GO:0005080(protein kinase C binding)//GO:0005102(receptor binding)//GO:0019899(enzyme binding)//GO:0042802(identical protein binding)//GO:0016887(ATPase activity)//GO:0001664(G-protein coupled receptor binding)//GO:0071933(Arp2/3 complex binding)//GO:0046872(metal ion binding)//GO:0005515(protein binding)//GO:0008022(protein C-terminus binding)//GO:005…	GO:0097061(dendritic spine organization)//GO:0097062(dendritic spine maintenance)//GO:0043046(DNA methylation involved in gamete generation)//GO:0043113(receptor clustering)//GO:0002092(positive regulation of receptor internalization)//GO:0015844(monoamine transport)//GO:0042149(cellular response to glucose starvation)//GO:0006468(protein phosphorylation)//GO:0007268(synaptic transmission)//GO:00…
GTPBP1	ENSG00000100226	protein_coding	+	chr22:39101727-39190203	13.2995	4.89016	2.71963	1.44341	0.0255	0.30274	up	9567	GP-1|GP1|HSPC018	MIM:602245|HGNC:HGNC:4669|Ensembl:ENSG00000100226|HPRD:03765|Vega:OTTHUMG00000151002	22	22q13.1	GTP binding protein 1		GO:0005622(intracellular)//GO:0016020(membrane)//GO:0000177(cytoplasmic exosome (RNase complex))//GO:0005829(cytosol)	GO:0003746(translation elongation factor activity)//GO:0003924(GTPase activity)//GO:0044822(poly(A) RNA binding)//GO:0005525(GTP binding)	GO:0006414(translational elongation)//GO:0006955(immune response)//GO:0061014(positive regulation of mRNA catabolic process)//GO:0007165(signal transduction)
TIMP3	ENSG00000100234	protein_coding	+	chr22:32908538-33454358	540.792	226.134	2.39146	1.25789	0.01635	0.242452	up	7078	HSMRK222|K222|K222TA2|SFD	MIM:188826|HGNC:HGNC:11822|Ensembl:ENSG00000100234|HPRD:01785|Vega:OTTHUMG00000030784	22	22q12.3	TIMP metallopeptidase inhibitor 3	hsa05205(Proteoglycans in cancer)//hsa05206(MicroRNAs in cancer)	GO:0005604(basement membrane)//GO:0070062(extracellular exosome)//GO:0005578(proteinaceous extracellular matrix)//GO:0031012(extracellular matrix)//GO:0005634(nucleus)//GO:0005615(extracellular space)//GO:0005737(cytoplasm)	GO:0002020(protease binding)//GO:0005515(protein binding)//GO:0046872(metal ion binding)//GO:0008191(metalloendopeptidase inhibitor activity)	GO:0007568(aging)//GO:0071310(cellular response to organic substance)//GO:0010033(response to organic substance)//GO:0051593(response to folic acid)//GO:0051045(negative regulation of membrane protein ectodomain proteolysis)//GO:1904684(negative regulation of metalloendopeptidase activity)//GO:0048553(negative regulation of metalloenzyme activity)//GO:0009612(response to mechanical stimulus)//GO:…
CYB5R3	ENSG00000100243	protein_coding	-	chr22:43013845-43045574	56.9519	17.978	3.16789	1.66352	0.0032	0.0998637	up	1727	B5R|DIA1	MIM:613213|HGNC:HGNC:2873|Ensembl:ENSG00000100243|HPRD:08942	22	22q13.2	cytochrome b5 reductase 3	hsa00520(Amino sugar and nucleotide sugar metabolism)	GO:0005833(hemoglobin complex)//GO:0005743(mitochondrial inner membrane)//GO:0070062(extracellular exosome)//GO:0005811(lipid particle)//GO:0016020(membrane)//GO:0005789(endoplasmic reticulum membrane)//GO:0005739(mitochondrion)//GO:0005741(mitochondrial outer membrane)//GO:0005783(endoplasmic reticulum)//GO:0005737(cytoplasm)	GO:0051287(NAD binding)//GO:0016491(oxidoreductase activity)//GO:0004128(cytochrome-b5 reductase activity, acting on NAD(P)H)//GO:0016208(AMP binding)//GO:0043531(ADP binding)//GO:0071949(FAD binding)//GO:0050660(flavin adenine dinucleotide binding)	GO:0055114(oxidation-reduction process)//GO:0044281(small molecule metabolic process)//GO:0019852(L-ascorbic acid metabolic process)//GO:0008015(blood circulation)//GO:0006695(cholesterol biosynthetic process)//GO:0006767(water-soluble vitamin metabolic process)//GO:0006766(vitamin metabolic process)
LMF2	ENSG00000100258	protein_coding	-	chr22:50941375-50946135	4.36571	1.16437	3.74943	1.90667	0.0249	0.300207	up	91289	TMEM112B|TMEM153	HGNC:HGNC:25096|Ensembl:ENSG00000100258|HPRD:12519|Vega:OTTHUMG00000150206	22	22q13.33	lipase maturation factor 2		GO:0016020(membrane)//GO:0016021(integral component of membrane)//GO:0005789(endoplasmic reticulum membrane)	GO:0005515(protein binding)
ARSA	ENSG00000100299	protein_coding	-	chr22:51061181-51066607	6.72709	1.20076	5.60234	2.48603	0.0107	0.192491	up	410	MLD	MIM:607574|HGNC:HGNC:713|Ensembl:ENSG00000100299|HPRD:09617|Vega:OTTHUMG00000150180	22	22q13.33	arylsulfatase A	hsa00600(Sphingolipid metabolism)//hsa04142(Lysosome)	GO:0005768(endosome)//GO:0005764(lysosome)//GO:0070062(extracellular exosome)//GO:0001669(acrosomal vesicle)//GO:0016021(integral component of membrane)//GO:0043202(lysosomal lumen)//GO:0005788(endoplasmic reticulum lumen)//GO:0031232(extrinsic component of external side of plasma membrane)//GO:0005615(extracellular space)	GO:0004065(arylsulfatase activity)//GO:0008484(sulfuric ester hydrolase activity)//GO:0003824(catalytic activity)//GO:0005515(protein binding)//GO:0005509(calcium ion binding)//GO:0004098(cerebroside-sulfatase activity)	GO:0051597(response to methylmercury)//GO:0044267(cellular protein metabolic process)//GO:0008152(metabolic process)//GO:0044281(small molecule metabolic process)//GO:0006914(autophagy)//GO:0045471(response to ethanol)//GO:0043687(post-translational protein modification)//GO:0006687(glycosphingolipid metabolic process)//GO:0009268(response to pH)//GO:0007584(response to nutrient)//GO:0007339(bind…
CBX7	ENSG00000100307	protein_coding	-	chr22:39516171-39548679	13.7886	4.25876	3.2377	1.69497	0.0001	0.0101099	up	23492	-	MIM:608457|HGNC:HGNC:1557|Ensembl:ENSG00000100307|HPRD:12234|Vega:OTTHUMG00000150418	22	22q13.1	chromobox 7		GO:0035102(PRC1 complex)//GO:0000792(heterochromatin)//GO:0000790(nuclear chromatin)//GO:0005654(nucleoplasm)//GO:0031519(PcG protein complex)//GO:0005634(nucleus)//GO:0005737(cytoplasm)	GO:0003682(chromatin binding)//GO:0005515(protein binding)//GO:0035064(methylated histone binding)//GO:0003727(single-stranded RNA binding)	GO:0016568(chromatin modification)//GO:0048733(sebaceous gland development)//GO:0006351(transcription, DNA-templated)//GO:0042493(response to drug)//GO:0000122(negative regulation of transcription from RNA polymerase II promoter)
ASCC2	ENSG00000100325	protein_coding	-	chr22:30184596-30234293	25.0631	8.27519	3.0287	1.5987	0.007	0.154406	up	84164	ASC1p100|p100	MIM:614216|HGNC:HGNC:24103|Ensembl:ENSG00000100325|HPRD:16515|Vega:OTTHUMG00000067658	22	22q12.1	activating signal cointegrator 1 complex subunit 2		GO:0005654(nucleoplasm)		GO:0006307(DNA dealkylation involved in DNA repair)//GO:0006281(DNA repair)//GO:0006355(regulation of transcription, DNA-templated)//GO:0006351(transcription, DNA-templated)
GRAP2	ENSG00000100351	protein_coding	+	chr22:40297085-40369725	5.03827	0.8947	5.63123	2.49345	0.00475	0.126826	up	9402	GADS|GRAP-2|GRB2L|GRBLG|GRID|GRPL|GrbX|Grf40|Mona|P38	MIM:604518|HGNC:HGNC:4563|Ensembl:ENSG00000100351|HPRD:05156|Vega:OTTHUMG00000151097	22	22q13.2	GRB2-related adaptor protein 2	hsa04660(T cell receptor signaling pathway)	GO:0005829(cytosol)//GO:0005654(nucleoplasm)//GO:0005634(nucleus)//GO:0005737(cytoplasm)//GO:0005768(endosome)	GO:0005515(protein binding)//GO:0005070(SH3/SH2 adaptor activity)	GO:0045087(innate immune response)//GO:0007267(cell-cell signaling)//GO:0031295(T cell costimulation)//GO:0050852(T cell receptor signaling pathway)//GO:0007265(Ras protein signal transduction)//GO:0009967(positive regulation of signal transduction)//GO:0038095(Fc-epsilon receptor signaling pathway)
NCF4	ENSG00000100365	protein_coding	+	chr22:37243414-37274057	8.68429	3.46951	2.50304	1.32368	0.0492	0.403133	up	4689	NCF|P40PHOX|SH3PXD4	MIM:601488|HGNC:HGNC:7662|Ensembl:ENSG00000100365|HPRD:03289|Vega:OTTHUMG00000150548	22	22q13.1	neutrophil cytosolic factor 4	hsa04145(Phagosome)//hsa04380(Osteoclast differentiation)//hsa04670(Leukocyte transendothelial migration)//hsa05140(Leishmaniasis)	GO:0010008(endosome membrane)//GO:0016020(membrane)//GO:0032010(phagolysosome)//GO:0043020(NADPH oxidase complex)//GO:0005829(cytosol)	GO:0032266(phosphatidylinositol-3-phosphate binding)//GO:0016176(superoxide-generating NADPH oxidase activator activity)//GO:0035091(phosphatidylinositol binding)//GO:0046983(protein dimerization activity)//GO:0005515(protein binding)	GO:0055114(oxidation-reduction process)//GO:0002474(antigen processing and presentation of peptide antigen via MHC class I)//GO:0002479(antigen processing and presentation of exogenous peptide antigen via MHC class I, TAP-dependent)//GO:0042590(antigen processing and presentation of exogenous peptide antigen via MHC class I)//GO:0007264(small GTPase mediated signal transduction)//GO:0043085(posit…
FAM118A	ENSG00000100376	protein_coding	+	chr22:45704848-45737836	62.9368	17.5349	3.58922	1.84367	0.0064	0.148246	up	55007	C22orf8	HGNC:HGNC:1313|Ensembl:ENSG00000100376|HPRD:07936|Vega:OTTHUMG00000151338	22	22q13	family with sequence similarity 118 member A		GO:0016021(integral component of membrane)	GO:0005515(protein binding)
KCTD17	ENSG00000100379	protein_coding	+	chr22:37447778-37459430	4.25212	1.07808	3.94417	1.97972	0.033	0.340002	up	79734	-	MIM:616386|HGNC:HGNC:25705|Ensembl:ENSG00000100379|HPRD:07764|Vega:OTTHUMG00000150532	22	22q12.3	potassium channel tetramerization domain containing 17		GO:0005783(endoplasmic reticulum)//GO:0031463(Cul3-RING ubiquitin ligase complex)//GO:0005737(cytoplasm)	GO:0005515(protein binding)//GO:0042802(identical protein binding)//GO:0097602(cullin family protein binding)	GO:0032469(endoplasmic reticulum calcium ion homeostasis)//GO:0043161(proteasome-mediated ubiquitin-dependent protein catabolic process)//GO:0051260(protein homooligomerization)//GO:0045724(positive regulation of cilium assembly)//GO:0030030(cell projection organization)
ZC3H7B	ENSG00000100403	protein_coding	+	chr22:41697525-41756151	7.90624	4.27284	1.85035	0.887796	0.03305	0.340156	up	23264	RoXaN	HGNC:HGNC:30869|Ensembl:ENSG00000100403|HPRD:06711|Vega:OTTHUMG00000150969	22	22q13.2	zinc finger CCCH-type containing 7B		GO:0005634(nucleus)	GO:0044822(poly(A) RNA binding)//GO:0046872(metal ion binding)//GO:0005515(protein binding)	GO:0016032(viral process)
BRD1	ENSG00000100425	protein_coding	-	chr22:50166930-50221196	12.3228	6.70579	1.83763	0.877849	0.0495	0.403785	up	23774	BRL|BRPF1|BRPF2	MIM:604589|HGNC:HGNC:1102|Ensembl:ENSG00000100425|HPRD:06848|Vega:OTTHUMG00000150288	22	22q13.33	bromodomain containing 1		GO:0005654(nucleoplasm)//GO:0030425(dendrite)//GO:0005634(nucleus)//GO:0070776(MOZ/MORF histone acetyltransferase complex)//GO:0043204(perikaryon)	GO:0008270(zinc ion binding)//GO:0042393(histone binding)	GO:0035902(response to immobilization stress)//GO:0051602(response to electrical stimulus)//GO:0043966(histone H3 acetylation)
GSTZ1	ENSG00000100577	protein_coding	+	chr14:77741298-77797940	5.50175	1.90666	2.88556	1.52885	0.0261	0.306119	up	2954	GSTZ1-1|MAAI|MAI	MIM:603758|HGNC:HGNC:4643|Ensembl:ENSG00000100577|HPRD:04785|Vega:OTTHUMG00000171551	14	14q24.3	glutathione S-transferase zeta 1	hsa00350(Tyrosine metabolism)//	GO:0005739(mitochondrion)//GO:0005737(cytoplasm)//GO:0005829(cytosol)	GO:0004602(glutathione peroxidase activity)//GO:0016034(maleylacetoacetate isomerase activity)//GO:0004364(glutathione transferase activity)//GO:0016853(isomerase activity)//GO:0003824(catalytic activity)//GO:0042803(protein homodimerization activity)//GO:0005515(protein binding)//GO:0016740(transferase activity)	GO:0006572(tyrosine catabolic process)//GO:0044281(small molecule metabolic process)//GO:1901687(glutathione derivative biosynthetic process)//GO:0098869(cellular oxidant detoxification)//GO:0006559(L-phenylalanine catabolic process)//GO:0034641(cellular nitrogen compound metabolic process)//GO:0009072(aromatic amino acid family metabolic process)//GO:0006805(xenobiotic metabolic process)//GO:000…
ITPK1	ENSG00000100605	protein_coding	-	chr14:93403258-93582665	28.5643	9.12125	3.13162	1.64691	0.02915	0.321495	up	3705	ITRPK1	MIM:601838|HGNC:HGNC:6177|Ensembl:ENSG00000100605|HPRD:03501|Vega:OTTHUMG00000171226	14	14q31	inositol-tetrakisphosphate 1-kinase	hsa00562(Inositol phosphate metabolism)//	GO:0005622(intracellular)//GO:0005829(cytosol)	GO:0052831(inositol-1,3,4,6-tetrakisphosphate 1-phosphatase activity)//GO:0052825(inositol-1,3,4,5,6-pentakisphosphate 1-phosphatase activity)//GO:0005524(ATP binding)//GO:0052830(inositol-1,3,4,6-tetrakisphosphate 6-phosphatase activity)//GO:0016853(isomerase activity)//GO:0000287(magnesium ion binding)//GO:0052725(inositol-1,3,4-trisphosphate 6-kinase activity)//GO:0047325(inositol tetrakisphos…	GO:0032957(inositol trisphosphate metabolic process)//GO:0044281(small molecule metabolic process)//GO:0007596(blood coagulation)//GO:0016310(phosphorylation)//GO:0016311(dephosphorylation)//GO:0043647(inositol phosphate metabolic process)//GO:0007165(signal transduction)
SLC8A3	ENSG00000100678	protein_coding	-	chr14:70510933-70696904	1.63473	0.34749	4.7044	2.23401	0.02755	0.314758	up	6547	NCX3	MIM:607991|HGNC:HGNC:11070|Ensembl:ENSG00000100678|HPRD:09723|Vega:OTTHUMG00000152342	14	14q24.1	solute carrier family 8 member A3	hsa04020(Calcium signaling pathway)//hsa04022(cGMP-PKG signaling pathway)//hsa04740(Olfactory transduction)//hsa04974(Protein digestion and absorption)	GO:0005886(plasma membrane)//GO:0005887(integral component of plasma membrane)//GO:0005874(microtubule)//GO:0043204(perikaryon)//GO:0048471(perinuclear region of cytoplasm)//GO:0005789(endoplasmic reticulum membrane)//GO:0016021(integral component of membrane)//GO:0031226(intrinsic component of plasma membrane)//GO:0030054(cell junction)//GO:0005741(mitochondrial outer membrane)//GO:0031594(neuro…	GO:0005432(calcium:sodium antiporter activity)//GO:0005516(calmodulin binding)//GO:0046872(metal ion binding)	GO:1990034(calcium ion export from cell)//GO:0071320(cellular response to cAMP)//GO:0048709(oligodendrocyte differentiation)//GO:0042552(myelination)//GO:0007613(memory)//GO:0060291(long-term synaptic potentiation)//GO:0007154(cell communication)//GO:0002244(hematopoietic progenitor cell differentiation)//GO:0006816(calcium ion transport)//GO:0055085(transmembrane transport)//GO:0070588(calcium i…
ZFYVE21	ENSG00000100711	protein_coding	+	chr14:104182066-104200005	26.5321	13.0812	2.02827	1.02025	0.0281	0.317122	up	79038	HCVP7TP1|ZF21	MIM:613504|HGNC:HGNC:20760|Ensembl:ENSG00000100711|HPRD:15733|Vega:OTTHUMG00000171651	14	14q32.33	zinc finger FYVE-type containing 21		GO:0005768(endosome)//GO:0016023(cytoplasmic, membrane-bounded vesicle)//GO:0005925(focal adhesion)	GO:0046872(metal ion binding)//GO:0005515(protein binding)
TELO2	ENSG00000100726	protein_coding	+	chr16:1543344-1662111	3.08212	0.56718	5.4341	2.44204	0.02195	0.279574	up	9894	CLK2|TEL2	MIM:611140|HGNC:HGNC:29099|Ensembl:ENSG00000100726|HPRD:10016|Vega:OTTHUMG00000044471	16	16p13.3	telomere maintenance 2	hsa03460(Fanconi anemia pathway)	GO:0031931(TORC1 complex)//GO:0034399(nuclear periphery)//GO:0016020(membrane)//GO:0031932(TORC2 complex)//GO:0000781(chromosome, telomeric region)//GO:0005622(intracellular)//GO:0005634(nucleus)//GO:0005737(cytoplasm)	GO:0019901(protein kinase binding)//GO:0032947(protein complex scaffold)//GO:0051879(Hsp90 protein binding)//GO:0005515(protein binding)//GO:0032403(protein complex binding)	GO:1904263(positive regulation of TORC1 signaling)//GO:0050821(protein stabilization)//GO:0032006(regulation of TOR signaling)//GO:1904515(positive regulation of TORC2 signaling)//GO:0071902(positive regulation of protein serine/threonine kinase activity)
BDKRB1	ENSG00000100739	protein_coding	+	chr14:96671015-96735304	1.01611	0.0822955	12.3472	3.62611	0.04655	0.39218	up	623	B1BKR|B1R|BDKRB2|BKB1R|BKR1|BRADYB1	MIM:600337|HGNC:HGNC:1029|HPRD:02639	14	14q32.1-q32.2	bradykinin receptor B1	hsa04020(Calcium signaling pathway)//hsa04080(Neuroactive ligand-receptor interaction)//hsa04610(Complement and coagulation cascades)//hsa04750(Inflammatory mediator regulation of TRP channels)//hsa04810(Regulation of actin cytoskeleton)//hsa05200(Pathways in cancer)	GO:0016021(integral component of membrane)//GO:0005887(integral component of plasma membrane)//GO:0043005(neuron projection)//GO:0005886(plasma membrane)//GO:0005829(cytosol)//GO:0005783(endoplasmic reticulum)	GO:0042277(peptide binding)//GO:0004947(bradykinin receptor activity)//GO:0005515(protein binding)	GO:0030308(negative regulation of cell growth)//GO:0051281(positive regulation of release of sequestered calcium ion into cytosol)//GO:0019233(sensory perception of pain)//GO:0002687(positive regulation of leukocyte migration)//GO:0007204(positive regulation of cytosolic calcium ion concentration)//GO:0006954(inflammatory response)//GO:0001933(negative regulation of protein phosphorylation)//GO:0…
MTG2	ENSG00000101181	protein_coding	+	chr20:60758084-60778624	8.83865	2.19512	4.02648	2.00952	0.0098	0.185227	up	26164	GTPBP5|ObgH1|dJ1005F21.2	MIM:610919|HGNC:HGNC:16239|Ensembl:ENSG00000101181|HPRD:13617|Vega:OTTHUMG00000032897	20	20q13.33	mitochondrial ribosome-associated GTPase 2		GO:0005743(mitochondrial inner membrane)//GO:0005759(mitochondrial matrix)//GO:0005761(mitochondrial ribosome)	GO:0003924(GTPase activity)//GO:0000287(magnesium ion binding)//GO:0005525(GTP binding)	GO:0008152(metabolic process)//GO:0070129(regulation of mitochondrial translation)//GO:0042254(ribosome biogenesis)//GO:0044065(regulation of respiratory system process)
BIRC7	ENSG00000101197	protein_coding	+	chr20:61867234-61871859	0.949824	0	inf	inf	0.0351	0.352289	up	79444	KIAP|LIVIN|ML-IAP|MLIAP|RNF50	MIM:605737|HGNC:HGNC:13702|Ensembl:ENSG00000101197|HPRD:05761|Vega:OTTHUMG00000032957	20	20q13.3	baculoviral IAP repeat containing 7	hsa04120(Ubiquitin mediated proteolysis)//hsa05145(Toxoplasmosis)//hsa05200(Pathways in cancer)//hsa05222(Small cell lung cancer)	GO:0005876(spindle microtubule)//GO:0005634(nucleus)//GO:0005794(Golgi apparatus)//GO:0005737(cytoplasm)	GO:0008270(zinc ion binding)//GO:0004869(cysteine-type endopeptidase inhibitor activity)//GO:0004842(ubiquitin-protein transferase activity)//GO:0016874(ligase activity)//GO:0005515(protein binding)//GO:0019899(enzyme binding)	GO:0070247(regulation of natural killer cell apoptotic process)//GO:0090307(mitotic spindle assembly)//GO:0007257(activation of JUN kinase activity)//GO:0042127(regulation of cell proliferation)//GO:1990001(inhibition of cysteine-type endopeptidase activity involved in apoptotic process)//GO:0009966(regulation of signal transduction)//GO:0016567(protein ubiquitination)//GO:0043066(negative regula…
CDC25B	ENSG00000101224	protein_coding	+	chr20:3767577-3786762	13.2377	6.58719	2.0096	1.00691	0.03195	0.33469	up	994	-	MIM:116949|HGNC:HGNC:1726|Ensembl:ENSG00000101224|HPRD:00307|Vega:OTTHUMG00000031764	20	20p13	cell division cycle 25B	hsa04010(MAPK signaling pathway)//hsa04110(Cell cycle)//hsa04914(Progesterone-mediated oocyte maturation)//hsa05206(MicroRNAs in cancer)	GO:0005654(nucleoplasm)//GO:0005829(cytosol)//GO:0005813(centrosome)//GO:0005737(cytoplasm)//GO:0000922(spindle pole)	GO:0019901(protein kinase binding)//GO:0005515(protein binding)//GO:0004725(protein tyrosine phosphatase activity)	GO:0001556(oocyte maturation)//GO:0008284(positive regulation of cell proliferation)//GO:0007067(mitotic nuclear division)//GO:0032467(positive regulation of cytokinesis)//GO:0006468(protein phosphorylation)//GO:0051301(cell division)//GO:0000278(mitotic cell cycle)//GO:0007144(female meiosis I)//GO:0045860(positive regulation of protein kinase activity)//GO:0045931(positive regulation of mitotic…
PLCB4	ENSG00000101333	protein_coding	+	chr20:9049409-9461889	12.6194	2.22057	5.68295	2.50664	0.0011	0.0541931	up	5332	ARCND2|PI-PLC	MIM:600810|HGNC:HGNC:9059|Ensembl:ENSG00000101333|HPRD:02885|Vega:OTTHUMG00000031853	20	20p12	phospholipase C beta 4	hsa00562(Inositol phosphate metabolism)//	GO:0005790(smooth endoplasmic reticulum)//GO:0030425(dendrite)//GO:0005829(cytosol)//GO:0014069(postsynaptic density)//GO:0005622(intracellular)//GO:0005634(nucleus)	GO:0051019(mitogen-activated protein kinase binding)//GO:0004871(signal transducer activity)//GO:0004629(phospholipase C activity)//GO:0004435(phosphatidylinositol phospholipase C activity)//GO:0005515(protein binding)//GO:0005509(calcium ion binding)	GO:0016042(lipid catabolic process)//GO:0035556(intracellular signal transduction)//GO:0044281(small molecule metabolic process)//GO:0043267(negative regulation of potassium ion transport)//GO:0043647(inositol phosphate metabolic process)
SNTA1	ENSG00000101400	protein_coding	-	chr20:31995760-32031698	3.53321	1.19863	2.9477	1.55959	0.02875	0.319809	up	6640	LQT12|SNT1|TACIP1|dJ1187J4.5	MIM:601017|HGNC:HGNC:11167|Ensembl:ENSG00000101400|HPRD:03009|Vega:OTTHUMG00000032259	20	20q11.2	syntrophin alpha 1		GO:0016328(lateral plasma membrane)//GO:0016013(syntrophin complex)//GO:0043234(protein complex)//GO:0045211(postsynaptic membrane)//GO:0030054(cell junction)//GO:0042383(sarcolemma)//GO:0031594(neuromuscular junction)//GO:0005622(intracellular)//GO:0005856(cytoskeleton)//GO:0005737(cytoplasm)	GO:0050998(nitric-oxide synthase binding)//GO:0003779(actin binding)//GO:0005198(structural molecule activity)//GO:0005516(calmodulin binding)//GO:0044325(ion channel binding)//GO:0017080(sodium channel regulator activity)//GO:0030165(PDZ domain binding)//GO:0005515(protein binding)//GO:0051117(ATPase binding)	GO:0060307(regulation of ventricular cardiac muscle cell membrane repolarization)//GO:0002027(regulation of heart rate)//GO:0006936(muscle contraction)//GO:1902305(regulation of sodium ion transmembrane transport)//GO:0003117(regulation of vasoconstriction by circulating norepinephrine)//GO:0007528(neuromuscular junction development)//GO:0086005(ventricular cardiac muscle cell action potential)//…
BPI	ENSG00000101425	protein_coding	+	chr20:36838889-36965907	1.31921	0.0870409	15.1562	3.92184	0.02575	0.30422	up	671	BPIFD1|rBPI	MIM:109195|HGNC:HGNC:1095|Ensembl:ENSG00000101425|HPRD:00174|Vega:OTTHUMG00000032441	20	20q11.23	bactericidal/permeability-increasing protein		GO:0016021(integral component of membrane)//GO:0005887(integral component of plasma membrane)//GO:0005615(extracellular space)//GO:0005737(cytoplasm)//GO:0070062(extracellular exosome)	GO:0001530(lipopolysaccharide binding)	GO:0050829(defense response to Gram-negative bacterium)//GO:0032715(negative regulation of interleukin-6 production)//GO:0032720(negative regulation of tumor necrosis factor production)//GO:0043031(negative regulation of macrophage activation)//GO:0006955(immune response)//GO:0032717(negative regulation of interleukin-8 production)
CST3	ENSG00000101439	protein_coding	-	chr20:23608533-23619110	168.736	73.4966	2.29582	1.19901	0.0015	0.0657257	up	1471	ARMD11|HEL-S-2	MIM:604312|HGNC:HGNC:2475|Ensembl:ENSG00000101439|HPRD:05056|Vega:OTTHUMG00000032080	20	20p11.21	cystatin C	hsa04970(Salivary secretion)	GO:0005604(basement membrane)//GO:0005764(lysosome)//GO:0070062(extracellular exosome)//GO:0005576(extracellular region)//GO:0031965(nuclear membrane)//GO:0048471(perinuclear region of cytoplasm)//GO:0030424(axon)//GO:0043292(contractile fiber)//GO:0005783(endoplasmic reticulum)//GO:0005771(multivesicular body)//GO:0005615(extracellular space)//GO:0043025(neuronal cell body)	GO:0002020(protease binding)//GO:0004869(cysteine-type endopeptidase inhibitor activity)//GO:0001540(beta-amyloid binding)//GO:0042802(identical protein binding)//GO:0004866(endopeptidase inhibitor activity)//GO:0005515(protein binding)	GO:0044267(cellular protein metabolic process)//GO:0060313(negative regulation of blood vessel remodeling)//GO:0070301(cellular response to hydrogen peroxide)//GO:0045861(negative regulation of proteolysis)//GO:0034103(regulation of tissue remodeling)//GO:0010716(negative regulation of extracellular matrix disassembly)//GO:0006952(defense response)//GO:0010466(negative regulation of peptidase act…
PPP1R16B	ENSG00000101445	protein_coding	+	chr20:37434347-37551667	6.37993	2.61325	2.44139	1.2877	0.00465	0.125363	up	26051	ANKRD4|TIMAP	MIM:613275|HGNC:HGNC:15850|Ensembl:ENSG00000101445|HPRD:15168|Vega:OTTHUMG00000032465	20	20q11.23	protein phosphatase 1 regulatory subunit 16B		GO:0005886(plasma membrane)//GO:0005634(nucleus)//GO:0042995(cell projection)//GO:0048471(perinuclear region of cytoplasm)	GO:0008599(protein phosphatase type 1 regulator activity)//GO:0005515(protein binding)	GO:0050790(regulation of catalytic activity)//GO:0051489(regulation of filopodium assembly)//GO:1903589(positive regulation of blood vessel endothelial cell proliferation involved in sprouting angiogenesis)//GO:0035308(negative regulation of protein dephosphorylation)//GO:0061028(establishment of endothelial barrier)//GO:1902309(negative regulation of peptidyl-serine dephosphorylation)//GO:003530…
MYOM1	ENSG00000101605	protein_coding	-	chr18:3066804-3247275	9.68947	4.01495	2.41334	1.27103	0.03345	0.342247	up	8736	SKELEMIN	MIM:603508|HGNC:HGNC:7613|Ensembl:ENSG00000101605|HPRD:04618|Vega:OTTHUMG00000178209	18	18p11.31	myomesin 1		GO:0031430(M band)//GO:0005863(striated muscle myosin thick filament)	GO:0008307(structural constituent of muscle)//GO:0005515(protein binding)//GO:0042802(identical protein binding)//GO:0042803(protein homodimerization activity)	GO:0002230(positive regulation of defense response to virus by host)//GO:0098779(mitophagy in response to mitochondrial depolarization)//GO:0006936(muscle contraction)//GO:0098792(xenophagy)
ASB9	ENSG00000102048	protein_coding	-	chrX:15253409-15288589	2.39542	0.399512	5.99587	2.58397	0.0168	0.243908	up	140462	-	MIM:300890|HGNC:HGNC:17184|Ensembl:ENSG00000102048|HPRD:06452|Vega:OTTHUMG00000021172	X	Xp22.2	ankyrin repeat and SOCS box containing 9		GO:0005739(mitochondrion)	GO:0005515(protein binding)	GO:0035556(intracellular signal transduction)//GO:0045732(positive regulation of protein catabolic process)//GO:0016567(protein ubiquitination)
ZC3H12B	ENSG00000102053	protein_coding	+	chrX:64708614-64727767	1.48719	0.580243	2.56305	1.35786	0.03095	0.330094	up	340554	CXorf32|MCPIP2	MIM:300889|HGNC:HGNC:17407|Ensembl:ENSG00000102053|HPRD:16774|Vega:OTTHUMG00000021719	X	Xq12	zinc finger CCCH-type containing 12B			GO:0004519(endonuclease activity)//GO:0046872(metal ion binding)	GO:0090305(nucleic acid phosphodiester bond hydrolysis)
PHEX	ENSG00000102174	protein_coding	+	chrX:22050558-22269427	2.55753	0.124691	20.5109	4.35832	0.00295	0.0957566	up	5251	HPDR|HPDR1|HYP|HYP1|LXHR|PEX|XLH	MIM:300550|HGNC:HGNC:8918|Ensembl:ENSG00000102174|HPRD:02387|Vega:OTTHUMG00000021241	X	Xp22.2-p22.1	phosphate regulating endopeptidase homolog, X-linked		GO:0005783(endoplasmic reticulum)//GO:0005886(plasma membrane)//GO:0005887(integral component of plasma membrane)//GO:0005794(Golgi apparatus)//GO:0048471(perinuclear region of cytoplasm)	GO:0008270(zinc ion binding)//GO:0004177(aminopeptidase activity)//GO:0004222(metalloendopeptidase activity)	GO:0007267(cell-cell signaling)//GO:0001501(skeletal system development)//GO:0019637(organophosphate metabolic process)//GO:0006508(proteolysis)//GO:0006464(cellular protein modification process)//GO:0030282(bone mineralization)
GABRE	ENSG00000102287	protein_coding	-	chrX:151121595-151143152	77.5913	25.4137	3.05313	1.61029	0.02195	0.279574	up	2564	-	MIM:300093|HGNC:HGNC:4085|Ensembl:ENSG00000102287|HPRD:02104|Vega:OTTHUMG00000024176	X	Xq28	gamma-aminobutyric acid type A receptor epsilon subunit	hsa04080(Neuroactive ligand-receptor interaction)//hsa04723(Retrograde endocannabinoid signaling)//hsa04727(GABAergic synapse)//hsa05032(Morphine addiction)//hsa05033(Nicotine addiction)	GO:0034707(chloride channel complex)//GO:0005887(integral component of plasma membrane)//GO:0030054(cell junction)//GO:0045211(postsynaptic membrane)//GO:1902711(GABA-A receptor complex)	GO:0004890(GABA-A receptor activity)//GO:0005254(chloride channel activity)//GO:0005230(extracellular ligand-gated ion channel activity)	GO:1902476(chloride transmembrane transport)//GO:0006810(transport)//GO:0007214(gamma-aminobutyric acid signaling pathway)
KLF8	ENSG00000102349	protein_coding	+	chrX:56258853-56314322	15.1485	6.96348	2.17543	1.1213	0.006	0.143963	up	11279	BKLF3|ZNF741	MIM:300286|HGNC:HGNC:6351|Ensembl:ENSG00000102349|HPRD:02238	X	Xp11.21	Kruppel-like factor 8		GO:0005634(nucleus)	GO:0046872(metal ion binding)//GO:0003677(DNA binding)	GO:0006351(transcription, DNA-templated)//GO:0006355(regulation of transcription, DNA-templated)
HSF4	ENSG00000102878	protein_coding	+	chr16:67188082-67203848	13.8421	3.83243	3.61183	1.85273	0.0028	0.0937083	up	3299	CTM|CTRCT5	MIM:602438|HGNC:HGNC:5227|HPRD:03896	16	16q21	heat shock transcription factor 4		GO:0005654(nucleoplasm)//GO:0005634(nucleus)	GO:0043565(sequence-specific DNA binding)//GO:0003714(transcription corepressor activity)//GO:0019903(protein phosphatase binding)//GO:0003700(transcription factor activity, sequence-specific DNA binding)	GO:0008284(positive regulation of cell proliferation)//GO:0048468(cell development)//GO:0033169(histone H3-K9 demethylation)//GO:0006351(transcription, DNA-templated)//GO:0045597(positive regulation of cell differentiation)//GO:0045944(positive regulation of transcription from RNA polymerase II promoter)//GO:0000122(negative regulation of transcription from RNA polymerase II promoter)//GO:0070207…
ZNF423	ENSG00000102935	protein_coding	-	chr16:49521434-49891830	3.87491	1.60147	2.4196	1.27477	0.03815	0.364793	up	23090	Ebfaz|JBTS19|NPHP14|OAZ|Roaz|ZFP423|Zfp104|hOAZ	MIM:604557|HGNC:HGNC:16762|Ensembl:ENSG00000102935|HPRD:05189|Vega:OTTHUMG00000173491	16	16q12	zinc finger protein 423		GO:0005634(nucleus)	GO:0003676(nucleic acid binding)//GO:0046872(metal ion binding)//GO:0005515(protein binding)//GO:0003677(DNA binding)	GO:0006351(transcription, DNA-templated)//GO:0030154(cell differentiation)//GO:0007219(Notch signaling pathway)//GO:0030513(positive regulation of BMP signaling pathway)//GO:0007399(nervous system development)//GO:0045892(negative regulation of transcription, DNA-templated)//GO:0045893(positive regulation of transcription, DNA-templated)
ACD	ENSG00000102977	protein_coding	-	chr16:67678821-67694713	3.20439	0.359559	8.912	3.15575	0.0063	0.147159	up	65057	PIP1|PTOP|TINT1|TPP1	MIM:609377|HGNC:HGNC:25070|Ensembl:ENSG00000102977|HPRD:12417|Vega:OTTHUMG00000137547	16	16q22.1	adrenocortical dysplasia homolog (mouse)		GO:0070187(telosome)//GO:0000784(nuclear chromosome, telomeric region)//GO:0000783(nuclear telomere cap complex)//GO:0005654(nucleoplasm)//GO:0005634(nucleus)//GO:0005737(cytoplasm)	GO:0070182(DNA polymerase binding)//GO:0042162(telomeric DNA binding)//GO:0005515(protein binding)//GO:0044877(macromolecular complex binding)	GO:0000723(telomere maintenance)//GO:0051973(positive regulation of telomerase activity)//GO:0030326(embryonic limb morphogenesis)//GO:0032212(positive regulation of telomere maintenance via telomerase)//GO:0070200(establishment of protein localization to telomere)//GO:0001501(skeletal system development)//GO:0070198(protein localization to chromosome, telomeric region)//GO:0060381(positive regul…
ZNF821	ENSG00000102984	protein_coding	-	chr16:71879893-71962913	2.54929	0.439948	5.79452	2.53469	0.00925	0.179372	up	55565	-	HGNC:HGNC:28043|Ensembl:ENSG00000102984|HPRD:14244|Vega:OTTHUMG00000176874	16	16q22.2	zinc finger protein 821		GO:0005634(nucleus)	GO:0003676(nucleic acid binding)//GO:0046872(metal ion binding)//GO:0005515(protein binding)//GO:0044212(transcription regulatory region DNA binding)//GO:0003700(transcription factor activity, sequence-specific DNA binding)	GO:0006351(transcription, DNA-templated)//GO:0045944(positive regulation of transcription from RNA polymerase II promoter)
NME3	ENSG00000103024	protein_coding	-	chr16:1756183-1821731	2.50129	0.466244	5.36475	2.42351	0.02735	0.313765	up	4832	DR-nm23|NDPK-C|NDPKC|NM23-H3|NM23H3|c371H6.2	MIM:601817|HGNC:HGNC:7851|Ensembl:ENSG00000103024|HPRD:03488|Vega:OTTHUMG00000128635	16	16q13.3	NME/NM23 nucleoside diphosphate kinase 3	hsa00230(Purine metabolism)//hsa00240(Pyrimidine metabolism)//	GO:0005739(mitochondrion)//GO:0070062(extracellular exosome)	GO:0005524(ATP binding)//GO:0046872(metal ion binding)//GO:0005515(protein binding)//GO:0004550(nucleoside diphosphate kinase activity)	GO:0006220(pyrimidine nucleotide metabolic process)//GO:0006165(nucleoside diphosphate phosphorylation)//GO:0006163(purine nucleotide metabolic process)//GO:0006228(UTP biosynthetic process)//GO:0006241(CTP biosynthetic process)//GO:0009142(nucleoside triphosphate biosynthetic process)//GO:0006915(apoptotic process)//GO:0042981(regulation of apoptotic process)//GO:0006183(GTP biosynthetic process)
NDRG4	ENSG00000103034	protein_coding	+	chr16:58496749-58547532	2.12313	0.618103	3.4349	1.78027	5e-05	0.00584669	up	65009	BDM1|SMAP-8|SMAP8	MIM:614463|HGNC:HGNC:14466|Ensembl:ENSG00000103034|HPRD:14817|Vega:OTTHUMG00000133485	16	16q21	NDRG family member 4		GO:0016021(integral component of membrane)//GO:0005789(endoplasmic reticulum membrane)//GO:0005829(cytosol)//GO:0016323(basolateral plasma membrane)//GO:0005739(mitochondrion)//GO:0031253(cell projection membrane)//GO:0005737(cytoplasm)	GO:0003674(molecular_function)//GO:0005515(protein binding)	GO:0010976(positive regulation of neuron projection development)//GO:0048278(vesicle docking)//GO:0048662(negative regulation of smooth muscle cell proliferation)//GO:0060038(cardiac muscle cell proliferation)//GO:0007420(brain development)//GO:0010642(negative regulation of platelet-derived growth factor receptor signaling pathway)//GO:0014912(negative regulation of smooth muscle cell migration)…
TAF1C	ENSG00000103168	protein_coding	-	chr16:84178864-84220669	8.13926	2.20816	3.68598	1.88205	0.0084	0.170735	up	9013	MGC:39976|SL1|TAFI110|TAFI95	MIM:604905|HGNC:HGNC:11534|Ensembl:ENSG00000103168|HPRD:05364|Vega:OTTHUMG00000176665	16	16q24	TATA-box binding protein associated factor, RNA polymerase I, C		GO:0005654(nucleoplasm)//GO:0043231(intracellular membrane-bounded organelle)//GO:0000120(RNA polymerase I transcription factor complex)	GO:0001164(RNA polymerase I CORE element sequence-specific DNA binding)//GO:0005515(protein binding)	GO:0000183(chromatin silencing at rDNA)//GO:0045815(positive regulation of gene expression, epigenetic)//GO:0006362(transcription elongation from RNA polymerase I promoter)//GO:0006360(transcription from RNA polymerase I promoter)//GO:0040029(regulation of gene expression, epigenetic)//GO:0010467(gene expression)//GO:0006366(transcription from RNA polymerase II promoter)//GO:0045814(negative regu…
NAGPA	ENSG00000103174	protein_coding	-	chr16:4932507-5147809	2.05016	0.515849	3.97435	1.99072	0.02705	0.312169	up	51172	APAA|UCE	MIM:607985|HGNC:HGNC:17378|Ensembl:ENSG00000103174|HPRD:12145|Vega:OTTHUMG00000090515	16	16p13.3	N-acetylglucosamine-1-phosphodiester alpha-N-acetylglucosaminidase	hsa04142(Lysosome)	GO:0016021(integral component of membrane)//GO:0032580(Golgi cisterna membrane)	GO:0003944(N-acetylglucosamine-1-phosphodiester alpha-N-acetylglucosaminidase activity)	GO:0005975(carbohydrate metabolic process)//GO:0006622(protein targeting to lysosome)//GO:0006464(cellular protein modification process)//GO:0006486(protein glycosylation)//GO:0007040(lysosome organization)
TSC2	ENSG00000103197	protein_coding	+	chr16:2089815-2185899	24.7888	4.7125	5.26021	2.39512	0.0001	0.0101099	up	7249	LAM|PPP1R160|TSC4	MIM:191092|HGNC:HGNC:12363|Ensembl:ENSG00000103197|HPRD:01850|Vega:OTTHUMG00000128745	16	16p13.3	tuberous sclerosis 2		GO:0005764(lysosome)//GO:0033596(TSC1-TSC2 complex)//GO:0016020(membrane)//GO:0048471(perinuclear region of cytoplasm)//GO:0005794(Golgi apparatus)//GO:0005829(cytosol)//GO:0005634(nucleus)//GO:0005737(cytoplasm)	GO:0019902(phosphatase binding)//GO:0042803(protein homodimerization activity)//GO:0031267(small GTPase binding)//GO:0005096(GTPase activator activity)//GO:0005515(protein binding)//GO:0071889(14-3-3 protein binding)	GO:0046626(regulation of insulin receptor signaling pathway)//GO:0032007(negative regulation of TOR signaling)//GO:0050918(positive chemotaxis)//GO:0016192(vesicle-mediated transport)//GO:0008285(negative regulation of cell proliferation)//GO:0046323(glucose import)//GO:0048009(insulin-like growth factor receptor signaling pathway)//GO:0001843(neural tube closure)//GO:0044861(protein transport in…
ZNF500	ENSG00000103199	protein_coding	-	chr16:4746510-4817625	4.03353	0.577624	6.98297	2.80384	0.00975	0.184822	up	26048	ZKSCAN18|ZSCAN50	HGNC:HGNC:23716|Ensembl:ENSG00000103199|HPRD:18347|Vega:OTTHUMG00000176543	16	16p13.3	zinc finger protein 500		GO:0005654(nucleoplasm)//GO:0005634(nucleus)//GO:0005737(cytoplasm)	GO:0043565(sequence-specific DNA binding)//GO:0003676(nucleic acid binding)//GO:0046872(metal ion binding)//GO:0003700(transcription factor activity, sequence-specific DNA binding)	GO:0006351(transcription, DNA-templated)//GO:0006355(regulation of transcription, DNA-templated)
NARFL	ENSG00000103245	protein_coding	-	chr16:770580-791329	13.7122	2.20159	6.22835	2.63885	0.002	0.077489	up	64428	HPRN|IOP1|LET1L|PRN	MIM:611118|HGNC:HGNC:14179|Ensembl:ENSG00000103245|HPRD:14810|Vega:OTTHUMG00000122093	16	16p13.3	nuclear prelamin A recognition factor-like		GO:0097361(CIA complex)	GO:0051539(4 iron, 4 sulfur cluster binding)//GO:0046872(metal ion binding)//GO:0051536(iron-sulfur cluster binding)//GO:0003954(NADH dehydrogenase activity)	GO:0044281(small molecule metabolic process)//GO:0016226(iron-sulfur cluster assembly)//GO:0001666(response to hypoxia)//GO:0002244(hematopoietic progenitor cell differentiation)//GO:0032364(oxygen homeostasis)//GO:0006355(regulation of transcription, DNA-templated)
FAM173A	ENSG00000103254	protein_coding	+	chr16:770580-791329	3.47271	0.35073	9.90138	3.30763	0.0374	0.3619	up	65990	C16orf24	HGNC:HGNC:14152|Ensembl:ENSG00000103254|HPRD:14500|Vega:OTTHUMG00000121177	16	16p13.3	family with sequence similarity 173 member A		GO:0016021(integral component of membrane)
EEF2K	ENSG00000103319	protein_coding	+	chr16:22217591-22300059	34.5207	16.4066	2.10407	1.07318	0.0168	0.243908	up	29904	HSU93850|eEF-2K	MIM:606968|HGNC:HGNC:24615|Ensembl:ENSG00000103319|HPRD:07369|Vega:OTTHUMG00000094771	16	16p12.2	eukaryotic elongation factor 2 kinase	hsa04152(AMPK signaling pathway)//hsa04921(Oxytocin signaling pathway)	GO:0014069(postsynaptic density)//GO:0005737(cytoplasm)//GO:0005829(cytosol)	GO:0004674(protein serine/threonine kinase activity)//GO:0004686(elongation factor-2 kinase activity)//GO:0008135(translation factor activity, RNA binding)//GO:0005524(ATP binding)//GO:0005516(calmodulin binding)//GO:0004672(protein kinase activity)//GO:0005509(calcium ion binding)	GO:0008286(insulin receptor signaling pathway)//GO:0031952(regulation of protein autophosphorylation)//GO:0061003(positive regulation of dendritic spine morphogenesis)//GO:0006468(protein phosphorylation)//GO:0071320(cellular response to cAMP)//GO:0006414(translational elongation)//GO:0046777(protein autophosphorylation)//GO:0002931(response to ischemia)//GO:0043066(negative regulation of apoptot…
CORO7-PAM16	ENSG00000103426	protein_coding	-	chr16:4364761-4475706	1.92365	9.06173e-06	212279	17.6956	0.04065	0.373183	up	100529144	-	HGNC:HGNC:44424|Ensembl:ENSG00000103426|Vega:OTTHUMG00000177664	16	16p	CORO7-PAM16 readthrough
CORO2B	ENSG00000103647	protein_coding	+	chr15:68871307-69020145	4.06749	0.904679	4.49606	2.16866	0.0016	0.0678114	up	10391	CLIPINC	MIM:605002|HGNC:HGNC:2256|Ensembl:ENSG00000103647|HPRD:05416|Vega:OTTHUMG00000133288	15	15q23	coronin 2B		GO:0016020(membrane)//GO:0015629(actin cytoskeleton)//GO:0005737(cytoplasm)	GO:0005515(protein binding)//GO:0003779(actin binding)//GO:0051015(actin filament binding)	GO:0030036(actin cytoskeleton organization)
PLAT	ENSG00000104368	protein_coding	-	chr8:42032235-42065242	14.5089	3.20358	4.52896	2.17918	0.00055	0.0336784	up	5327	T-PA|TPA	MIM:173370|HGNC:HGNC:9051|Ensembl:ENSG00000104368|HPRD:01419|Vega:OTTHUMG00000164072	8	8p12	plasminogen activator, tissue type	hsa04610(Complement and coagulation cascades)//hsa05202(Transcriptional misregulation in cancer)	GO:0070062(extracellular exosome)//GO:0045177(apical part of cell)//GO:0009986(cell surface)//GO:0031012(extracellular matrix)//GO:0005576(extracellular region)//GO:0005615(extracellular space)//GO:0005737(cytoplasm)//GO:0030141(secretory granule)	GO:0005102(receptor binding)//GO:0051219(phosphoprotein binding)//GO:0005515(protein binding)//GO:0004252(serine-type endopeptidase activity)//GO:0001948(glycoprotein binding)	GO:0045861(negative regulation of proteolysis)//GO:0048008(platelet-derived growth factor receptor signaling pathway)//GO:0014909(smooth muscle cell migration)//GO:0001666(response to hypoxia)//GO:0007596(blood coagulation)//GO:0042730(fibrinolysis)//GO:0006508(proteolysis)//GO:0031639(plasminogen activation)//GO:0006464(cellular protein modification process)
NCALD	ENSG00000104490	protein_coding	-	chr8:102698770-103137135	7.67608	2.71828	2.82386	1.49767	0.0006	0.0359463	up	83988	-	MIM:606722|HGNC:HGNC:7655|Ensembl:ENSG00000104490|HPRD:09466|Vega:OTTHUMG00000164876	8	8q22.2	neurocalcin delta	hsa04740(Olfactory transduction)	GO:0005622(intracellular)//GO:0030130(clathrin coat of trans-Golgi network vesicle)//GO:0070062(extracellular exosome)//GO:0005829(cytosol)	GO:0043014(alpha-tubulin binding)//GO:0003779(actin binding)//GO:0015631(tubulin binding)//GO:0005515(protein binding)//GO:0030276(clathrin binding)//GO:0005509(calcium ion binding)	GO:0003073(regulation of systemic arterial blood pressure)//GO:0016192(vesicle-mediated transport)//GO:0007268(synaptic transmission)//GO:0019722(calcium-mediated signaling)
KLHDC4	ENSG00000104731	protein_coding	-	chr16:87634131-87799598	13.2064	3.20498	4.12059	2.04285	0.00095	0.0486555	up	54758	-	HGNC:HGNC:25272|Ensembl:ENSG00000104731|HPRD:11180|Vega:OTTHUMG00000137657	16	16q24	kelch domain containing 4			GO:0005515(protein binding)
KCNN4	ENSG00000104783	protein_coding	-	chr19:44270684-44285409	4.75787	0.933759	5.09538	2.34919	0.02385	0.293379	up	3783	DHS2|IK|IK1|IKCA1|KCA4|KCa3.1|SK4|hIKCa1|hKCa4|hSK4	MIM:602754|HGNC:HGNC:6293|Ensembl:ENSG00000104783|HPRD:04130|Vega:OTTHUMG00000182779	19	19q13.2	potassium calcium-activated channel subfamily N member 4	hsa04911(Insulin secretion)//hsa04970(Salivary secretion)//hsa04974(Protein digestion and absorption)	GO:0016021(integral component of membrane)//GO:0008076(voltage-gated potassium channel complex)//GO:0005886(plasma membrane)//GO:0016323(basolateral plasma membrane)//GO:0045121(membrane raft)//GO:0016324(apical plasma membrane)//GO:0043025(neuronal cell body)	GO:0019903(protein phosphatase binding)//GO:0022894(Intermediate conductance calcium-activated potassium channel activity)//GO:0015269(calcium-activated potassium channel activity)//GO:0005516(calmodulin binding)//GO:0016286(small conductance calcium-activated potassium channel activity)//GO:0005515(protein binding)	GO:0006952(defense response)//GO:0050714(positive regulation of protein secretion)//GO:0045332(phospholipid translocation)//GO:0002376(immune system process)//GO:0071805(potassium ion transmembrane transport)//GO:0050862(positive regulation of T cell receptor signaling pathway)//GO:0030322(stabilization of membrane potential)//GO:0007268(synaptic transmission)//GO:0071435(potassium ion export)//G…
CLASRP	ENSG00000104859	protein_coding	+	chr19:45542297-45574214	22.8991	6.44187	3.55473	1.82974	0.00225	0.0833488	up	11129	CLASP|SFRS16|SWAP2	HGNC:HGNC:17731|Ensembl:ENSG00000104859|HPRD:11552|Vega:OTTHUMG00000150189	19	19q13.3	CLK4-associating serine/arginine rich protein		GO:0005634(nucleus)		GO:0006397(mRNA processing)//GO:0008380(RNA splicing)
TBC1D17	ENSG00000104946	protein_coding	+	chr19:50372294-50392005	10.3974	1.83512	5.6658	2.50228	0.0013	0.059939	up	79735	-	MIM:616659|HGNC:HGNC:25699|Ensembl:ENSG00000104946|HPRD:15471|Vega:OTTHUMG00000183376	19	19q13.33	TBC1 domain family member 17		GO:0005776(autophagosome)//GO:0031410(cytoplasmic vesicle)//GO:0005829(cytosol)	GO:0005096(GTPase activator activity)//GO:0005515(protein binding)	GO:0042147(retrograde transport, endosome to Golgi)//GO:0015031(protein transport)//GO:1902017(regulation of cilium assembly)//GO:0006914(autophagy)//GO:0043547(positive regulation of GTPase activity)
AES	ENSG00000104964	protein_coding	-	chr19:3052907-3063105	37.0775	17.2506	2.14935	1.1039	0.019	0.261381	up	166	AES-1|AES-2|ESP1|GRG|GRG5|Grg-5|TLE5	MIM:600188|HGNC:HGNC:307|Ensembl:ENSG00000104964|HPRD:02556|Vega:OTTHUMG00000180567	19	19p13.3	amino-terminal enhancer of split		GO:0005634(nucleus)	GO:0003714(transcription corepressor activity)//GO:0005515(protein binding)	GO:0010629(negative regulation of gene expression)//GO:0070555(response to interleukin-1)//GO:0060761(negative regulation of response to cytokine stimulus)//GO:2000210(positive regulation of anoikis)//GO:0009887(organ morphogenesis)//GO:0001501(skeletal system development)//GO:0006351(transcription, DNA-templated)//GO:0040008(regulation of growth)//GO:0031668(cellular response to extracellular st…
ILVBL	ENSG00000105135	protein_coding	-	chr19:15218213-15236985	4.78665	1.42244	3.3651	1.75065	0.0493	0.403271	up	10994	209L8|AHAS|ILV2H	MIM:605770|HGNC:HGNC:6041|Ensembl:ENSG00000105135|HPRD:16152|Vega:OTTHUMG00000165630	19	19p13.1	ilvB (bacterial acetolactate synthase)-like		GO:0016020(membrane)//GO:0016021(integral component of membrane)	GO:0003674(molecular_function)//GO:0030976(thiamine pyrophosphate binding)//GO:0000287(magnesium ion binding)//GO:0003824(catalytic activity)//GO:0005515(protein binding)//GO:0016740(transferase activity)	GO:0008152(metabolic process)//GO:0008150(biological_process)
AURKC	ENSG00000105146	protein_coding	+	chr19:57742376-57746916	0.939849	0.24919	3.77161	1.91518	0.0266	0.308627	up	6795	AIE2|AIK3|ARK3|AurC|HEL-S-90|SPGF5|STK13|aurora-C	MIM:603495|HGNC:HGNC:11391|Ensembl:ENSG00000105146|HPRD:04605|Vega:OTTHUMG00000183106	19	19q13.43	aurora kinase C		GO:0000780(condensed nuclear chromosome, centromeric region)//GO:0030496(midbody)//GO:0031616(spindle pole centrosome)//GO:0005819(spindle)//GO:0032133(chromosome passenger complex)//GO:0005876(spindle microtubule)//GO:0000793(condensed chromosome)//GO:0051233(spindle midzone)//GO:0005737(cytoplasm)	GO:0004672(protein kinase activity)//GO:0005524(ATP binding)//GO:0004712(protein serine/threonine/tyrosine kinase activity)//GO:0035174(histone serine kinase activity)	GO:0016570(histone modification)//GO:0048599(oocyte development)//GO:0008608(attachment of spindle microtubules to kinetochore)//GO:0006468(protein phosphorylation)//GO:0051256(mitotic spindle midzone assembly)//GO:0007283(spermatogenesis)//GO:0032467(positive regulation of cytokinesis)//GO:0035404(histone-serine phosphorylation)//GO:0051255(spindle midzone assembly)//GO:0051321(meiotic cell cycl…
PIAS4	ENSG00000105229	protein_coding	+	chr19:4007643-4039384	4.20671	0.788933	5.33216	2.41472	0.0361	0.355163	up	51588	PIAS-gamma|PIASY|Piasg|ZMIZ6	MIM:605989|HGNC:HGNC:17002|Ensembl:ENSG00000105229|HPRD:06910|Vega:OTTHUMG00000181759	19	19p13.3	protein inhibitor of activated STAT 4	hsa04064(NF-kappa B signaling pathway)//hsa04120(Ubiquitin mediated proteolysis)//hsa04630(Jak-STAT signaling pathway)	GO:1990234(transferase complex)//GO:0016363(nuclear matrix)//GO:0016605(PML body)//GO:0005654(nucleoplasm)//GO:0005634(nucleus)//GO:0005737(cytoplasm)	GO:0061665(SUMO ligase activity)//GO:0008270(zinc ion binding)//GO:0031625(ubiquitin protein ligase binding)//GO:0019789(SUMO transferase activity)//GO:0016874(ligase activity)//GO:0005515(protein binding)//GO:0003677(DNA binding)//GO:0008022(protein C-terminus binding)	GO:0033235(positive regulation of protein sumoylation)//GO:0044267(cellular protein metabolic process)//GO:0032088(negative regulation of NF-kappaB transcription factor activity)//GO:1902231(positive regulation of intrinsic apoptotic signaling pathway in response to DNA damage)//GO:1902174(positive regulation of keratinocyte apoptotic process)//GO:0016055(Wnt signaling pathway)//GO:0006303(double…
BBC3	ENSG00000105327	protein_coding	-	chr19:47724080-47736023	0.96025	0.169302	5.67181	2.50381	0.0204	0.269194	up	27113	JFY-1|JFY1|PUMA	MIM:605854|HGNC:HGNC:17868|Ensembl:ENSG00000105327|HPRD:16165|Vega:OTTHUMG00000183489	19	19q13.32	BCL2 binding component 3	hsa04115(p53 signaling pathway)//hsa04210(Apoptosis)//hsa04390(Hippo signaling pathway)//hsa05016(Huntington's disease)//hsa05162(Measles)	GO:0005783(endoplasmic reticulum)//GO:0005764(lysosome)//GO:0005739(mitochondrion)//GO:0005741(mitochondrial outer membrane)//GO:0005829(cytosol)	GO:0005515(protein binding)//GO:0001948(glycoprotein binding)//GO:0051117(ATPase binding)	GO:2001056(positive regulation of cysteine-type endopeptidase activity)//GO:0097190(apoptotic signaling pathway)//GO:1900740(positive regulation of protein insertion into mitochondrial membrane involved in apoptotic signaling pathway)//GO:2001244(positive regulation of intrinsic apoptotic signaling pathway)//GO:0045926(negative regulation of growth)//GO:0006974(cellular response to DNA damage sti…
DENND3	ENSG00000105339	protein_coding	+	chr8:142127376-142205907	38.5247	19.6809	1.95746	0.968986	0.0446	0.387178	up	22898	-	HGNC:HGNC:29134|Ensembl:ENSG00000105339|HPRD:11114|Vega:OTTHUMG00000164775	8	8q24.3	DENN domain containing 3		GO:0005622(intracellular)	GO:0017112(Rab guanyl-nucleotide exchange factor activity)	GO:0044257(cellular protein catabolic process)//GO:0008333(endosome to lysosome transport)//GO:0043547(positive regulation of GTPase activity)
PTPRS	ENSG00000105426	protein_coding	-	chr19:5158505-5340814	50.1239	22.4789	2.22982	1.15693	0.01595	0.239633	up	5802	PTPSIGMA	MIM:601576|HGNC:HGNC:9681|Ensembl:ENSG00000105426|HPRD:03344|Vega:OTTHUMG00000180325	19	19p13.3	protein tyrosine phosphatase, receptor type S		GO:0016021(integral component of membrane)//GO:0005887(integral component of plasma membrane)//GO:0070062(extracellular exosome)	GO:0005515(protein binding)//GO:0005001(transmembrane receptor protein tyrosine phosphatase activity)//GO:0004725(protein tyrosine phosphatase activity)	GO:0022038(corpus callosum development)//GO:0021510(spinal cord development)//GO:0021987(cerebral cortex development)//GO:0021549(cerebellum development)//GO:0030198(extracellular matrix organization)//GO:0007155(cell adhesion)//GO:0021766(hippocampus development)//GO:0090557(establishment of endothelial intestinal barrier)//GO:0035335(peptidyl-tyrosine dephosphorylation)
ZNF175	ENSG00000105497	protein_coding	+	chr19:52074550-52092991	10.8992	5.19619	2.09753	1.06869	0.01145	0.200773	up	7728	OTK18	MIM:601139|HGNC:HGNC:12964|Ensembl:ENSG00000105497|HPRD:03088|Vega:OTTHUMG00000167771	19	19q13.4	zinc finger protein 175		GO:0005622(intracellular)//GO:0045111(intermediate filament cytoskeleton)//GO:0005737(cytoplasm)//GO:0005654(nucleoplasm)	GO:0003676(nucleic acid binding)//GO:0046872(metal ion binding)//GO:0005515(protein binding)//GO:0003677(DNA binding)//GO:0003700(transcription factor activity, sequence-specific DNA binding)	GO:0051607(defense response to virus)//GO:0006351(transcription, DNA-templated)//GO:0006355(regulation of transcription, DNA-templated)
DKFZP761J1410	ENSG00000105520	protein_coding	+	chr19:11466061-11476374	3.34093	1.10987	3.0102	1.58986	0.01605	0.240206	up
PLEKHA4	ENSG00000105559	protein_coding	-	chr19:49340353-49371889	6.70617	1.1259	5.95623	2.5744	0.02715	0.312765	up	57664	PEPP1	MIM:607769|HGNC:HGNC:14339|Ensembl:ENSG00000105559|HPRD:09683|Vega:OTTHUMG00000183329	19	19q13.33	pleckstrin homology domain containing A4		GO:0016020(membrane)//GO:0005575(cellular_component)//GO:0005737(cytoplasm)	GO:0005545(1-phosphatidylinositol binding)	GO:0008150(biological_process)
WDR83OS	ENSG00000105583	protein_coding	-	chr19:12754020-12792716	14.3572	2.52379	5.68874	2.50811	0.04755	0.396134	up	51398	C19orf56|PTD008	HGNC:HGNC:30203|HPRD:17922	19	19p13.2	WD repeat domain 83 opposite strand		GO:0016021(integral component of membrane)
GCDH	ENSG00000105607	protein_coding	+	chr19:13001839-13030090	4.15808	1.14919	3.61827	1.8553	0.0167	0.243908	up	2639	ACAD5|GCD	MIM:608801|HGNC:HGNC:4189|Ensembl:ENSG00000105607|HPRD:01977|Vega:OTTHUMG00000180561	19	19p13.2	glutaryl-CoA dehydrogenase	hsa00071(Fatty acid degradation)//hsa00310(Lysine degradation)//hsa00380(Tryptophan metabolism)//	GO:0005743(mitochondrial inner membrane)//GO:0005739(mitochondrion)//GO:0005759(mitochondrial matrix)	GO:0052890(oxidoreductase activity, acting on the CH-CH group of donors, with a flavin as acceptor)//GO:0003995(acyl-CoA dehydrogenase activity)//GO:0009055(electron carrier activity)//GO:0000062(fatty-acyl-CoA binding)//GO:0004361(glutaryl-CoA dehydrogenase activity)//GO:0050660(flavin adenine dinucleotide binding)//GO:0016627(oxidoreductase activity, acting on the CH-CH group of donors)	GO:0055114(oxidation-reduction process)//GO:0044281(small molecule metabolic process)//GO:0006568(tryptophan metabolic process)//GO:0046949(fatty-acyl-CoA biosynthetic process)//GO:0055088(lipid homeostasis)//GO:0006554(lysine catabolic process)//GO:0034641(cellular nitrogen compound metabolic process)//GO:0033539(fatty acid beta-oxidation using acyl-CoA dehydrogenase)
MAST1	ENSG00000105613	protein_coding	+	chr19:12873816-12985765	1.20014	0	inf	inf	0.00015	0.0134799	up	22983	SAST|SAST170	MIM:612256|HGNC:HGNC:19034|Ensembl:ENSG00000105613|HPRD:17469|Vega:OTTHUMG00000180514	19	19p13.2	microtubule associated serine/threonine kinase 1		GO:0005622(intracellular)//GO:0005886(plasma membrane)//GO:0005856(cytoskeleton)//GO:0005737(cytoplasm)	GO:0005524(ATP binding)//GO:0004674(protein serine/threonine kinase activity)//GO:0000287(magnesium ion binding)//GO:0005515(protein binding)	GO:0006468(protein phosphorylation)//GO:0007010(cytoskeleton organization)//GO:0018105(peptidyl-serine phosphorylation)//GO:0035556(intracellular signal transduction)
RPL18A	ENSG00000105640	protein_coding	+	chr19:17970684-17974962	157.085	84.289	1.86364	0.898126	0.0195	0.263714	up	6142	L18A	MIM:604178|HGNC:HGNC:10311|Ensembl:ENSG00000105640|HPRD:16045|Vega:OTTHUMG00000183445	19	19p13	ribosomal protein L18a	hsa03010(Ribosome)	GO:0016020(membrane)//GO:0022625(cytosolic large ribosomal subunit)//GO:0005840(ribosome)//GO:0005829(cytosol)	GO:0044822(poly(A) RNA binding)//GO:0003735(structural constituent of ribosome)//GO:0005515(protein binding)//GO:0003723(RNA binding)	GO:0006415(translational termination)//GO:0001887(selenium compound metabolic process)//GO:0044267(cellular protein metabolic process)//GO:0000184(nuclear-transcribed mRNA catabolic process, nonsense-mediated decay)//GO:0044281(small molecule metabolic process)//GO:0006614(SRP-dependent cotranslational protein targeting to membrane)//GO:0019083(viral transcription)//GO:0010467(gene expression)//G…
ARRDC2	ENSG00000105643	protein_coding	+	chr19:18111940-18124911	12.527	4.80713	2.60591	1.38179	0.00945	0.181978	up	27106	CLONE24945|PP2703	HGNC:HGNC:25225|Ensembl:ENSG00000105643|HPRD:12492|Vega:OTTHUMG00000183483	19	19p13.11	arrestin domain containing 2		GO:0005886(plasma membrane)//GO:0031410(cytoplasmic vesicle)		GO:0007165(signal transduction)
COMP	ENSG00000105664	protein_coding	-	chr19:18893582-18902123	10.8497	4.20742	2.57871	1.36665	0.012	0.204865	up	1311	EDM1|EPD1|MED|PSACH|THBS5	MIM:600310|HGNC:HGNC:2227|Ensembl:ENSG00000105664|HPRD:02632|Vega:OTTHUMG00000169318	19	19p13.1	cartilage oligomeric matrix protein	hsa04145(Phagosome)//hsa04151(PI3K-Akt signaling pathway)//hsa04510(Focal adhesion)//hsa04512(ECM-receptor interaction)//hsa05144(Malaria)	GO:0005578(proteinaceous extracellular matrix)//GO:0031012(extracellular matrix)//GO:0070062(extracellular exosome)//GO:0005576(extracellular region)//GO:0005615(extracellular space)	GO:0002020(protease binding)//GO:0005518(collagen binding)//GO:0008201(heparin binding)//GO:0043395(heparan sulfate proteoglycan binding)//GO:0005201(extracellular matrix structural constituent)//GO:0005515(protein binding)//GO:0005509(calcium ion binding)	GO:0030198(extracellular matrix organization)//GO:0009887(organ morphogenesis)//GO:0060173(limb development)//GO:0001501(skeletal system development)//GO:0007155(cell adhesion)//GO:0043066(negative regulation of apoptotic process)//GO:0006915(apoptotic process)//GO:0003417(growth plate cartilage development)
LSR	ENSG00000105699	protein_coding	+	chr19:35739232-35758867	3.59159	0.783621	4.58334	2.1964	0.03695	0.359157	up	51599	ILDR3|LISCH7	MIM:616582|HGNC:HGNC:29572|Ensembl:ENSG00000105699|HPRD:17283|Vega:OTTHUMG00000183142	19	19q13.12	lipolysis stimulated lipoprotein receptor		GO:0005886(plasma membrane)//GO:0070062(extracellular exosome)//GO:0016021(integral component of membrane)//GO:0042627(chylomicron)//GO:0034362(low-density lipoprotein particle)//GO:0034361(very-low-density lipoprotein particle)		GO:0019216(regulation of lipid metabolic process)//GO:0001889(liver development)
ZNF14	ENSG00000105708	protein_coding	-	chr19:19821279-19843906	8.77846	3.86304	2.27242	1.18423	0.0259	0.305064	up	7561	GIOT-4|KOX6	MIM:194556|HGNC:HGNC:12924|Ensembl:ENSG00000105708|HPRD:01933|Vega:OTTHUMG00000182362	19	19p13.11	zinc finger protein 14		GO:0005634(nucleus)	GO:0046872(metal ion binding)//GO:0003677(DNA binding)	GO:0006351(transcription, DNA-templated)//GO:0006355(regulation of transcription, DNA-templated)
ZNF574	ENSG00000105732	protein_coding	+	chr19:42502472-42585701	1.36652	0.413027	3.30855	1.7262	0.0442	0.385776	up	64763	FP972	HGNC:HGNC:26166|Ensembl:ENSG00000105732|HPRD:15853|Vega:OTTHUMG00000182751	19	19q13.2	zinc finger protein 574		GO:0005634(nucleus)	GO:0003676(nucleic acid binding)//GO:0046872(metal ion binding)//GO:0003677(DNA binding)	GO:0006351(transcription, DNA-templated)//GO:0006355(regulation of transcription, DNA-templated)
ITGB8	ENSG00000105855	protein_coding	+	chr7:20367921-20455377	205.256	91.5313	2.24247	1.16509	0.04035	0.373183	up	3696	-	MIM:604160|HGNC:HGNC:6163|Ensembl:ENSG00000105855|HPRD:05001|Vega:OTTHUMG00000023594	7	7p21.1	integrin subunit beta 8	hsa04151(PI3K-Akt signaling pathway)//hsa04510(Focal adhesion)//hsa04512(ECM-receptor interaction)//hsa04514(Cell adhesion molecules (CAMs))//hsa04810(Regulation of actin cytoskeleton)//hsa05410(Hypertrophic cardiomyopathy (HCM))//hsa05412(Arrhythmogenic right ventricular cardiomyopathy (ARVC))//hsa05414(Dilated cardiomyopathy)	GO:0005886(plasma membrane)//GO:0070062(extracellular exosome)//GO:0008305(integrin complex)//GO:0009986(cell surface)//GO:0034686(integrin alphav-beta8 complex)	GO:0004872(receptor activity)//GO:0005102(receptor binding)//GO:1990430(extracellular matrix protein binding)	GO:0010629(negative regulation of gene expression)//GO:0051216(cartilage development)//GO:0001573(ganglioside metabolic process)//GO:0060674(placenta blood vessel development)//GO:0030198(extracellular matrix organization)//GO:0010628(positive regulation of gene expression)//GO:0007155(cell adhesion)//GO:0007229(integrin-mediated signaling pathway)//GO:0007160(cell-matrix adhesion)
MET	ENSG00000105976	protein_coding	+	chr7:116312443-116438440	29.7105	15.2886	1.94331	0.958516	0.03005	0.326231	up	4233	AUTS9|DFNB97|HGFR|RCCP2|c-Met	MIM:164860|HGNC:HGNC:7029|Ensembl:ENSG00000105976|HPRD:01280|Vega:OTTHUMG00000023299	7	7q31	MET proto-oncogene, receptor tyrosine kinase	hsa04014(Ras signaling pathway)//hsa04015(Rap1 signaling pathway)//hsa04060(Cytokine-cytokine receptor interaction)//hsa04144(Endocytosis)//hsa04151(PI3K-Akt signaling pathway)//hsa04360(Axon guidance)//hsa04510(Focal adhesion)//hsa04520(Adherens junction)//hsa05100(Bacterial invasion of epithelial cells)//hsa05120(Epithelial cell signaling in Helicobacter pylori infection)//hsa05144(Malaria)//hs…	GO:0016021(integral component of membrane)//GO:0005887(integral component of plasma membrane)//GO:0005576(extracellular region)//GO:0009986(cell surface)//GO:0009925(basal plasma membrane)//GO:0005886(plasma membrane)	GO:0005008(hepatocyte growth factor-activated receptor activity)//GO:0019903(protein phosphatase binding)//GO:0004713(protein tyrosine kinase activity)//GO:0005524(ATP binding)//GO:0017154(semaphorin receptor activity)//GO:0005515(protein binding)	GO:0072593(reactive oxygen species metabolic process)//GO:0050918(positive chemotaxis)//GO:0048754(branching morphogenesis of an epithelial tube)//GO:0007166(cell surface receptor signaling pathway)//GO:0014812(muscle cell migration)//GO:0051450(myoblast proliferation)//GO:0010629(negative regulation of gene expression)//GO:0071526(semaphorin-plexin signaling pathway)//GO:0000187(activation of MA…
LFNG	ENSG00000106003	protein_coding	+	chr7:2552162-2568811	11.5644	3.19693	3.61734	1.85493	0.002	0.077489	up	3955	SCDO3	MIM:602576|HGNC:HGNC:6560|Ensembl:ENSG00000106003|Vega:OTTHUMG00000152043	7	7p22.2	LFNG O-fucosylpeptide 3-beta-N-acetylglucosaminyltransferase	hsa00514(Other types of O-glycan biosynthesis)//hsa04330(Notch signaling pathway)	GO:0016020(membrane)//GO:0030173(integral component of Golgi membrane)//GO:0005576(extracellular region)//GO:1903561(extracellular vesicle)	GO:0003674(molecular_function)//GO:0046872(metal ion binding)//GO:0033829(O-fucosylpeptide 3-beta-N-acetylglucosaminyltransferase activity)//GO:0016757(transferase activity, transferring glycosyl groups)	GO:0008152(metabolic process)//GO:0008593(regulation of Notch signaling pathway)//GO:0007219(Notch signaling pathway)//GO:0002315(marginal zone B cell differentiation)//GO:0045747(positive regulation of Notch signaling pathway)//GO:0009887(organ morphogenesis)//GO:0007143(female meiotic division)//GO:0030217(T cell differentiation)//GO:0001541(ovarian follicle development)//GO:0014807(regulation …
PCOLCE	ENSG00000106333	protein_coding	+	chr7:100169854-100205798	71.092	27.1249	2.62091	1.39007	0.00715	0.156294	up	5118	PCPE|PCPE-1|PCPE1	MIM:600270|HGNC:HGNC:8738|Ensembl:ENSG00000106333|HPRD:02603|Vega:OTTHUMG00000156675	7	7q22	procollagen C-endopeptidase enhancer		GO:0031012(extracellular matrix)//GO:0070062(extracellular exosome)//GO:0005615(extracellular space)	GO:0005518(collagen binding)//GO:0016504(peptidase activator activity)//GO:0008201(heparin binding)//GO:0005515(protein binding)	GO:0006508(proteolysis)//GO:0007275(multicellular organism development)//GO:0010952(positive regulation of peptidase activity)
MEOX2	ENSG00000106511	protein_coding	-	chr7:15650836-15726437	14.8167	7.2871	2.03328	1.02381	0.0414	0.375697	up	4223	GAX|MOX2	MIM:600535|HGNC:HGNC:7014|Ensembl:ENSG00000106511|HPRD:02760|Vega:OTTHUMG00000152390	7	7p22.1-p21.3	mesenchyme homeobox 2		GO:0005634(nucleus)//GO:0016607(nuclear speck)//GO:0005737(cytoplasm)	GO:0003700(transcription factor activity, sequence-specific DNA binding)//GO:0000980(RNA polymerase II distal enhancer sequence-specific DNA binding)//GO:0000978(RNA polymerase II core promoter proximal region sequence-specific DNA binding)//GO:0001205(transcriptional activator activity, RNA polymerase II distal enhancer sequence-specific binding)//GO:0043565(sequence-specific DNA binding)//GO:00…	GO:0001757(somite specification)//GO:0060021(palate development)//GO:0060173(limb development)//GO:0008015(blood circulation)//GO:0006366(transcription from RNA polymerase II promoter)//GO:0007275(multicellular organism development)//GO:0045944(positive regulation of transcription from RNA polymerase II promoter)//GO:0070997(neuron death)//GO:0007519(skeletal muscle tissue development)//GO:000152…
PRKAG2	ENSG00000106617	protein_coding	-	chr7:151253196-151576299	22.516	9.50378	2.36917	1.24438	0.00655	0.149932	up	51422	AAKG|AAKG2|CMH6|H91620p|WPWS	MIM:602743|HGNC:HGNC:9386|Ensembl:ENSG00000106617|HPRD:04119|Vega:OTTHUMG00000157324	7	7q36.1	protein kinase AMP-activated non-catalytic subunit gamma 2	hsa04068(FoxO signaling pathway)//hsa04152(AMPK signaling pathway)//	GO:0005654(nucleoplasm)//GO:0031588(nucleotide-activated protein kinase complex)//GO:0005615(extracellular space)//GO:0005829(cytosol)	GO:0004862(cAMP-dependent protein kinase inhibitor activity)//GO:0008603(cAMP-dependent protein kinase regulator activity)//GO:0030295(protein kinase activator activity)//GO:0005524(ATP binding)//GO:0016208(AMP binding)//GO:0004679(AMP-activated protein kinase activity)//GO:0043531(ADP binding)//GO:0019901(protein kinase binding)//GO:0008607(phosphorylase kinase regulator activity)	GO:0061024(membrane organization)//GO:0046324(regulation of glucose import)//GO:0006112(energy reserve metabolic process)//GO:0006633(fatty acid biosynthetic process)//GO:0032147(activation of protein kinase activity)//GO:0046320(regulation of fatty acid oxidation)//GO:0007050(cell cycle arrest)//GO:0007005(mitochondrion organization)//GO:0005977(glycogen metabolic process)//GO:0006853(carnitine …
TBL2	ENSG00000106638	protein_coding	-	chr7:72983261-72993121	11.8416	4.19998	2.81944	1.49541	0.0067	0.152288	up	26608	WBSCR13|WS-betaTRP	MIM:605842|HGNC:HGNC:11586|Ensembl:ENSG00000106638|HPRD:09319|Vega:OTTHUMG00000023427	7	7q11.23	transducin (beta)-like 2		GO:0005783(endoplasmic reticulum)//GO:0030176(integral component of endoplasmic reticulum membrane)	GO:0019901(protein kinase binding)//GO:0044822(poly(A) RNA binding)//GO:0051219(phosphoprotein binding)//GO:0031369(translation initiation factor binding)	GO:0042149(cellular response to glucose starvation)//GO:0030968(endoplasmic reticulum unfolded protein response)//GO:0071456(cellular response to hypoxia)
CNTNAP3	ENSG00000106714	protein_coding	-	chr9:39072763-39288312	14.927	7.25054	2.05874	1.04176	0.03425	0.346625	up	79937	CASPR3|CNTNAP3A	MIM:610517|HGNC:HGNC:13834|Ensembl:ENSG00000106714|HPRD:10842|Vega:OTTHUMG00000019954	9	9p13.1	contactin associated protein-like 3		GO:0016021(integral component of membrane)//GO:0005576(extracellular region)//GO:0005886(plasma membrane)		GO:0008037(cell recognition)//GO:0007155(cell adhesion)
LHX6	ENSG00000106852	protein_coding	-	chr9:124964855-124991905	5.02824	0.781781	6.43179	2.68522	5e-05	0.00584669	up	26468	LHX6.1	MIM:608215|HGNC:HGNC:21735|Ensembl:ENSG00000106852|HPRD:10498|Vega:OTTHUMG00000020601	9	9q33.2	LIM homeobox 6		GO:0005634(nucleus)	GO:0043565(sequence-specific DNA binding)//GO:0008270(zinc ion binding)//GO:0005515(protein binding)//GO:0003700(transcription factor activity, sequence-specific DNA binding)	GO:0021800(cerebral cortex tangential migration)//GO:0021877(forebrain neuron fate commitment)//GO:0006351(transcription, DNA-templated)//GO:0021853(cerebral cortex GABAergic interneuron migration)//GO:0048469(cell maturation)//GO:0021799(cerebral cortex radially oriented cell migration)//GO:0006355(regulation of transcription, DNA-templated)
TBC1D13	ENSG00000107021	protein_coding	+	chr9:131549482-131572711	6.70284	2.42299	2.76634	1.46798	0.0379	0.363836	up	54662	-	MIM:616218|HGNC:HGNC:25571|Ensembl:ENSG00000107021|HPRD:18163|Vega:OTTHUMG00000020760	9	9q34.11	TBC1 domain family member 13			GO:0005096(GTPase activator activity)	GO:1902017(regulation of cilium assembly)//GO:0043547(positive regulation of GTPase activity)
APBA1	ENSG00000107282	protein_coding	-	chr9:72042445-72287222	5.34451	2.03019	2.63251	1.39644	0.03155	0.332294	up	320	D9S411E|LIN10|MINT1|X11|X11A|X11ALPHA	MIM:602414|HGNC:HGNC:578|Ensembl:ENSG00000107282|HPRD:03879|Vega:OTTHUMG00000019984	9	9q21.12	amyloid beta precursor protein binding family A member 1		GO:0005886(plasma membrane)//GO:0048471(perinuclear region of cytoplasm)//GO:0043005(neuron projection)//GO:0043234(protein complex)//GO:0005794(Golgi apparatus)//GO:0005829(cytosol)//GO:0008021(synaptic vesicle)//GO:0005634(nucleus)	GO:0005546(phosphatidylinositol-4,5-bisphosphate binding)//GO:0005515(protein binding)//GO:0001540(beta-amyloid binding)//GO:0032403(protein complex binding)//GO:0030165(PDZ domain binding)	GO:0014051(gamma-aminobutyric acid secretion)//GO:0035264(multicellular organism growth)//GO:0007268(synaptic transmission)//GO:0007155(cell adhesion)//GO:0001701(in utero embryonic development)//GO:0014047(glutamate secretion)//GO:0007626(locomotory behavior)//GO:0010468(regulation of gene expression)//GO:0006886(intracellular protein transport)//GO:0007399(nervous system development)//GO:000646…
PTGDS	ENSG00000107317	protein_coding	+	chr9:139869545-139880862	61.371	6.74072	9.1045	3.18658	0.00955	0.183177	up	5730	L-PGDS|LPGDS|PDS|PGD2|PGDS|PGDS2	MIM:176803|HGNC:HGNC:9592|Ensembl:ENSG00000107317|HPRD:08904|Vega:OTTHUMG00000020957	9	9q34.2-q34.3	prostaglandin D2 synthase	hsa00590(Arachidonic acid metabolism)//	GO:0070062(extracellular exosome)//GO:0005576(extracellular region)//GO:0005791(rough endoplasmic reticulum)//GO:0005794(Golgi apparatus)//GO:0048471(perinuclear region of cytoplasm)//GO:0005789(endoplasmic reticulum membrane)//GO:0031965(nuclear membrane)//GO:0005615(extracellular space)	GO:0036094(small molecule binding)//GO:0005501(retinoid binding)//GO:0005504(fatty acid binding)//GO:0005215(transporter activity)//GO:0004667(prostaglandin-D synthase activity)//GO:0005515(protein binding)	GO:2000255(negative regulation of male germ cell proliferation)//GO:0019371(cyclooxygenase pathway)//GO:0044281(small molecule metabolic process)//GO:0001516(prostaglandin biosynthetic process)//GO:0045187(regulation of circadian sleep/wake cycle, sleep)//GO:0006629(lipid metabolic process)//GO:0019369(arachidonic acid metabolic process)//GO:0006810(transport)//GO:0051384(response to glucocortico…
ABCA2	ENSG00000107331	protein_coding	-	chr9:139901685-139931234	9.68016	2.22486	4.35092	2.12132	5e-05	0.00584669	up	20	ABC2	MIM:600047|HGNC:HGNC:32|Ensembl:ENSG00000107331|HPRD:08967|Vega:OTTHUMG00000020958	9	9q34	ATP binding cassette subfamily A member 2	hsa02010(ABC transporters)//hsa04142(Lysosome)	GO:0005768(endosome)//GO:0016021(integral component of membrane)//GO:0043190(ATP-binding cassette (ABC) transporter complex)//GO:0010008(endosome membrane)//GO:0005815(microtubule organizing center)//GO:0005764(lysosome)//GO:0005765(lysosomal membrane)//GO:0016020(membrane)//GO:0016023(cytoplasmic, membrane-bounded vesicle)	GO:0005524(ATP binding)//GO:0000166(nucleotide binding)//GO:0042626(ATPase activity, coupled to transmembrane movement of substances)//GO:0005215(transporter activity)//GO:0016887(ATPase activity)	GO:0008152(metabolic process)//GO:0042493(response to drug)//GO:0048545(response to steroid hormone)//GO:0006629(lipid metabolic process)//GO:0033700(phospholipid efflux)//GO:0042632(cholesterol homeostasis)//GO:0032383(regulation of intracellular cholesterol transport)//GO:0006357(regulation of transcription from RNA polymerase II promoter)//GO:0055085(transmembrane transport)//GO:0006810(transp…
DVL1	ENSG00000107404	protein_coding	-	chr1:1266693-1284730	5.11893	0.866588	5.90698	2.56242	0.00055	0.0336784	up	1855	DRS2|DVL|DVL1L1|DVL1P1	MIM:601365|HGNC:HGNC:3084|Ensembl:ENSG00000107404|HPRD:03220|Vega:OTTHUMG00000003069	1	1p36	dishevelled segment polarity protein 1	hsa04310(Wnt signaling pathway)//hsa04330(Notch signaling pathway)//hsa04390(Hippo signaling pathway)//hsa04550(Signaling pathways regulating pluripotency of stem cells)//hsa04916(Melanogenesis)//hsa05166(HTLV-I infection)//hsa05200(Pathways in cancer)//hsa05217(Basal cell carcinoma)	GO:0030136(clathrin-coated vesicle)//GO:0016328(lateral plasma membrane)//GO:0005874(microtubule)//GO:0043005(neuron projection)//GO:0030425(dendrite)//GO:0030424(axon)//GO:0005829(cytosol)//GO:0045202(synapse)//GO:0030426(growth cone)//GO:0031410(cytoplasmic vesicle)//GO:0005622(intracellular)//GO:0016023(cytoplasmic, membrane-bounded vesicle)//GO:0043025(neuronal cell body)	GO:0019901(protein kinase binding)//GO:0019899(enzyme binding)//GO:0042802(identical protein binding)//GO:0048365(Rac GTPase binding)//GO:0005515(protein binding)//GO:0005109(frizzled binding)	GO:0010976(positive regulation of neuron projection development)//GO:0043113(receptor clustering)//GO:1902474(positive regulation of protein localization to synapse)//GO:0021915(neural tube development)//GO:0048668(collateral sprouting)//GO:0032091(negative regulation of protein binding)//GO:0060134(prepulse inhibition)//GO:0045893(positive regulation of transcription, DNA-templated)//GO:0050808(…
HPS1	ENSG00000107521	protein_coding	-	chr10:100175954-100206704	16.4199	4.7822	3.43355	1.7797	0.04415	0.385776	up	3257	BLOC3S1|HPS	MIM:604982|HGNC:HGNC:5163|Ensembl:ENSG00000107521|HPRD:05403|Vega:OTTHUMG00000018876	10	10q23.1-q23.3	HPS1, biogenesis of lysosomal organelles complex 3 subunit 1		GO:0031085(BLOC-3 complex)//GO:0005764(lysosome)//GO:0005887(integral component of plasma membrane)//GO:0016023(cytoplasmic, membrane-bounded vesicle)//GO:0005737(cytoplasm)	GO:0046983(protein dimerization activity)//GO:0005515(protein binding)	GO:0050896(response to stimulus)//GO:0007601(visual perception)//GO:0007040(lysosome organization)
CUBN	ENSG00000107611	protein_coding	-	chr10:16865962-17171830	2.36552	1.1102	2.13072	1.09134	0.0297	0.324976	up	8029	IFCR|MGA1|gp280	MIM:602997|HGNC:HGNC:2548|Ensembl:ENSG00000107611|HPRD:04296|Vega:OTTHUMG00000017741	10	10p12.31	cubilin	hsa04977(Vitamin digestion and absorption)	GO:0030139(endocytic vesicle)//GO:0005886(plasma membrane)//GO:0070062(extracellular exosome)//GO:0010008(endosome membrane)//GO:0016020(membrane)//GO:0005794(Golgi apparatus)//GO:0005829(cytosol)//GO:0005765(lysosomal membrane)//GO:0031232(extrinsic component of external side of plasma membrane)//GO:0005783(endoplasmic reticulum)//GO:0031526(brush border membrane)//GO:0043202(lysosomal lumen)//G…	GO:0042803(protein homodimerization activity)//GO:0004872(receptor activity)//GO:0005215(transporter activity)//GO:0031419(cobalamin binding)//GO:0005515(protein binding)//GO:0005509(calcium ion binding)	GO:0044281(small molecule metabolic process)//GO:0006898(receptor-mediated endocytosis)//GO:0006775(fat-soluble vitamin metabolic process)//GO:0042157(lipoprotein metabolic process)//GO:0042953(lipoprotein transport)//GO:0001894(tissue homeostasis)//GO:0008203(cholesterol metabolic process)//GO:0015889(cobalamin transport)//GO:0042359(vitamin D metabolic process)//GO:0009235(cobalamin metabolic p…
GDF10	ENSG00000107623	protein_coding	-	chr10:48425814-48438976	2.04218	0.291015	7.01742	2.81094	0.00645	0.148695	up	2662	BMP-3b|BMP3B	MIM:601361|HGNC:HGNC:4215|Ensembl:ENSG00000266524|HPRD:03218|Vega:OTTHUMG00000188319	10	10q11.22	growth differentiation factor 10		GO:0005615(extracellular space)	GO:0008083(growth factor activity)//GO:0005160(transforming growth factor beta receptor binding)//GO:0005125(cytokine activity)	GO:0030509(BMP signaling pathway)//GO:0010862(positive regulation of pathway-restricted SMAD protein phosphorylation)//GO:0001501(skeletal system development)//GO:0060395(SMAD protein signal transduction)//GO:0045668(negative regulation of osteoblast differentiation)//GO:0001649(osteoblast differentiation)//GO:0048468(cell development)//GO:0043408(regulation of MAPK cascade)//GO:0007179(transform…
KAZALD1	ENSG00000107821	protein_coding	+	chr10:102820998-102827891	6.04317	1.44048	4.19526	2.06876	0.01985	0.265547	up	81621	BONO1|FKSG28|FKSG40|IGFBP-rP10	MIM:609208|HGNC:HGNC:25460|HPRD:13755	10	10q24.31	Kazal type serine peptidase inhibitor domain 1		GO:0005614(interstitial matrix)	GO:0005520(insulin-like growth factor binding)	GO:0001503(ossification)//GO:0030198(extracellular matrix organization)//GO:0007275(multicellular organism development)//GO:0001558(regulation of cell growth)//GO:0030154(cell differentiation)
DHRS11	ENSG00000108272	protein_coding	+	chr17:34948227-34957235	2.40187	0.426965	5.62546	2.49197	0.02375	0.292706	up	79154	ARPG836|SDR24C1|spDHRS11	MIM:616159|HGNC:HGNC:28639|Ensembl:ENSG00000278535|HPRD:08331|Vega:OTTHUMG00000188442	17	17q12	dehydrogenase/reductase (SDR family) member 11		GO:0005576(extracellular region)	GO:0016491(oxidoreductase activity)	GO:0055114(oxidation-reduction process)
MLLT6	ENSG00000108292	protein_coding	+	chr17:36858704-36886056	40.0194	14.6201	2.73729	1.45275	0.00065	0.0370004	up	4302	AF17	MIM:600328|HGNC:HGNC:7138|Ensembl:ENSG00000275023|HPRD:08978|Vega:OTTHUMG00000188498	17	17q21	myeloid/lymphoid or mixed-lineage leukemia; translocated to, 6		GO:0005634(nucleus)	GO:0008270(zinc ion binding)//GO:0005515(protein binding)	GO:0006355(regulation of transcription, DNA-templated)
ASPA	ENSG00000108381	protein_coding	+	chr17:3343312-3461289	7.01469	1.70657	4.1104	2.03928	0.01135	0.199741	up	443	ACY2|ASP	MIM:608034|HGNC:HGNC:756|HPRD:02033	17	17p13.3	aspartoacylase	hsa00250(Alanine, aspartate and glutamate metabolism)//hsa00340(Histidine metabolism)//	GO:0070062(extracellular exosome)//GO:0005634(nucleus)//GO:0005737(cytoplasm)//GO:0005829(cytosol)	GO:0004046(aminoacylase activity)//GO:0016788(hydrolase activity, acting on ester bonds)//GO:0046872(metal ion binding)//GO:0005515(protein binding)//GO:0019807(aspartoacylase activity)	GO:0008652(cellular amino acid biosynthetic process)//GO:0006533(aspartate catabolic process)//GO:0008152(metabolic process)//GO:0044281(small molecule metabolic process)//GO:0034641(cellular nitrogen compound metabolic process)
PIGL	ENSG00000108474	protein_coding	+	chr17:15879873-16256970	38.7932	11.4446	3.38964	1.76113	0.04025	0.372754	up	9487	CHIME	MIM:605947|HGNC:HGNC:8966|Ensembl:ENSG00000108474|HPRD:12071|Vega:OTTHUMG00000059346	17	17p11.2	phosphatidylinositol glycan anchor biosynthesis class L	hsa00563(Glycosylphosphatidylinositol(GPI)-anchor biosynthesis)//	GO:0016021(integral component of membrane)//GO:0005789(endoplasmic reticulum membrane)	GO:0000225(N-acetylglucosaminylphosphatidylinositol deacetylase activity)	GO:0043687(post-translational protein modification)//GO:0044267(cellular protein metabolic process)//GO:0006506(GPI anchor biosynthetic process)//GO:0006501(C-terminal protein lipidation)//GO:0016254(preassembly of GPI anchor in ER membrane)
ENO3	ENSG00000108515	protein_coding	+	chr17:4848946-4860426	3.52393	0.247497	14.2383	3.8317	5e-05	0.00584669	up	2027	GSD13|MSE	MIM:131370|HGNC:HGNC:3354|Ensembl:ENSG00000108515|HPRD:11746|Vega:OTTHUMG00000099394	17	17p13.2	enolase 3 (beta, muscle)	hsa00010(Glycolysis / Gluconeogenesis)//	GO:0005886(plasma membrane)//GO:0070062(extracellular exosome)//GO:0000015(phosphopyruvate hydratase complex)//GO:0005829(cytosol)//GO:0005615(extracellular space)//GO:0005737(cytoplasm)	GO:0004634(phosphopyruvate hydratase activity)//GO:0046982(protein heterodimerization activity)//GO:0000287(magnesium ion binding)//GO:0042803(protein homodimerization activity)	GO:0007568(aging)//GO:0044281(small molecule metabolic process)//GO:0042493(response to drug)//GO:0006096(glycolytic process)//GO:0006094(gluconeogenesis)//GO:0006006(glucose metabolic process)//GO:0043403(skeletal muscle tissue regeneration)//GO:0005975(carbohydrate metabolic process)//GO:0021762(substantia nigra development)//GO:0061621(canonical glycolysis)
RASD1	ENSG00000108551	protein_coding	-	chr17:17397750-17399709	17.9496	3.20771	5.59578	2.48434	0.0032	0.0998637	up	51655	AGS1|DEXRAS1|MGC:26290	MIM:605550|HGNC:HGNC:15828|Ensembl:ENSG00000108551|HPRD:08958|Vega:OTTHUMG00000059292	17	17p11.2	RAS, dexamethasone-induced 1	hsa04713(Circadian entrainment)	GO:0016529(sarcoplasmic reticulum)//GO:0005886(plasma membrane)//GO:0005634(nucleus)//GO:0048471(perinuclear region of cytoplasm)	GO:0003924(GTPase activity)//GO:0005515(protein binding)//GO:0005525(GTP binding)	GO:0007263(nitric oxide mediated signal transduction)//GO:0045892(negative regulation of transcription, DNA-templated)//GO:0007186(G-protein coupled receptor signaling pathway)//GO:0007264(small GTPase mediated signal transduction)//GO:0007165(signal transduction)
SMARCD2	ENSG00000108604	protein_coding	-	chr17:61909443-61920425	16.2235	6.25399	2.59411	1.37524	0.0051	0.132348	up	6603	BAF60B|CRACD2|PRO2451|Rsc6p	MIM:601736|HGNC:HGNC:11107|Ensembl:ENSG00000108604|HPRD:03439|Vega:OTTHUMG00000179045	17	17q23.3	SWI/SNF related, matrix associated, actin dependent regulator of chromatin, subfamily d, member 2		GO:0005654(nucleoplasm)//GO:0043234(protein complex)//GO:0016514(SWI/SNF complex)//GO:0000790(nuclear chromatin)	GO:0031492(nucleosomal DNA binding)//GO:0000980(RNA polymerase II distal enhancer sequence-specific DNA binding)//GO:0000978(RNA polymerase II core promoter proximal region sequence-specific DNA binding)//GO:0005515(protein binding)//GO:0003713(transcription coactivator activity)	GO:0043044(ATP-dependent chromatin remodeling)//GO:0006351(transcription, DNA-templated)//GO:0006337(nucleosome disassembly)//GO:0006338(chromatin remodeling)//GO:0006357(regulation of transcription from RNA polymerase II promoter)
ICAM2	ENSG00000108622	protein_coding	-	chr17:62073430-62097994	11.5669	3.15207	3.66962	1.87563	0.0222	0.280367	up	3384	CD102	MIM:146630|HGNC:HGNC:5345|Ensembl:ENSG00000108622|HPRD:00888|Vega:OTTHUMG00000178865	17	17q23.3	intercellular adhesion molecule 2	hsa04514(Cell adhesion molecules (CAMs))//hsa04650(Natural killer cell mediated cytotoxicity)	GO:0005886(plasma membrane)//GO:0005887(integral component of plasma membrane)//GO:0016020(membrane)//GO:0016021(integral component of membrane)//GO:0001931(uropod)//GO:0070062(extracellular exosome)	GO:0005178(integrin binding)	GO:0002223(stimulatory C-type lectin receptor signaling pathway)//GO:0045087(innate immune response)//GO:0030198(extracellular matrix organization)//GO:0007155(cell adhesion)//GO:0016337(single organismal cell-cell adhesion)//GO:0050776(regulation of immune response)
DHX58	ENSG00000108771	protein_coding	-	chr17:40253421-40264751	8.41235	1.42135	5.91858	2.56525	0.0034	0.103769	up	79132	D11LGP2|D11lgp2e|LGP2|RLR-3	MIM:608588|HGNC:HGNC:29517|Ensembl:ENSG00000108771|HPRD:13115|Vega:OTTHUMG00000133493	17	17q21.2	DEXH-box helicase 58	hsa04622(RIG-I-like receptor signaling pathway)	GO:0005737(cytoplasm)	GO:0008270(zinc ion binding)//GO:0003727(single-stranded RNA binding)//GO:0005524(ATP binding)//GO:0004386(helicase activity)//GO:0003725(double-stranded RNA binding)//GO:0005515(protein binding)//GO:0003677(DNA binding)//GO:0016787(hydrolase activity)	GO:0045088(regulation of innate immune response)//GO:0039536(negative regulation of RIG-I signaling pathway)//GO:0008152(metabolic process)//GO:0045087(innate immune response)//GO:1900246(positive regulation of RIG-I signaling pathway)//GO:0032480(negative regulation of type I interferon production)//GO:0045824(negative regulation of innate immune response)//GO:0032481(positive regulation of type…
SGCA	ENSG00000108823	protein_coding	+	chr17:48240883-48258539	2.68706	0.529218	5.07744	2.3441	0.029	0.320934	up	6442	50-DAG|A2|ADL|DAG2|DMDA2|LGMD2D|SCARMD1|adhalin	MIM:600119|HGNC:HGNC:10805|Ensembl:ENSG00000108823|HPRD:02525|Vega:OTTHUMG00000162024	17	17q21	sarcoglycan alpha	hsa05410(Hypertrophic cardiomyopathy (HCM))//hsa05412(Arrhythmogenic right ventricular cardiomyopathy (ARVC))//hsa05414(Dilated cardiomyopathy)//hsa05416(Viral myocarditis)	GO:0016021(integral component of membrane)//GO:0045121(membrane raft)//GO:0016012(sarcoglycan complex)//GO:0005737(cytoplasm)//GO:0016010(dystrophin-associated glycoprotein complex)//GO:0005856(cytoskeleton)//GO:0005911(cell-cell junction)//GO:0042383(sarcolemma)	GO:0005515(protein binding)//GO:0005509(calcium ion binding)	GO:0007517(muscle organ development)//GO:0006936(muscle contraction)
LUC7L3	ENSG00000108848	protein_coding	+	chr17:48796904-48833574	116.112	59.0491	1.96636	0.975528	0.0204	0.269194	up	51747	CRA|CREAP-1|CROP|LUC7A|OA48-18|hLuc7A	MIM:609434|HGNC:HGNC:24309|Ensembl:ENSG00000108848|HPRD:16759|Vega:OTTHUMG00000162257	17	17q21.33	LUC7-like 3 pre-mRNA splicing factor		GO:0005685(U1 snRNP)//GO:0005654(nucleoplasm)//GO:0005634(nucleus)//GO:0016607(nuclear speck)//GO:0071004(U2-type prespliceosome)	GO:0044822(poly(A) RNA binding)//GO:0005515(protein binding)//GO:0003677(DNA binding)//GO:0003729(mRNA binding)	GO:0006376(mRNA splice site selection)//GO:0008380(RNA splicing)
SLC9A3R1	ENSG00000109062	protein_coding	+	chr17:72666716-72765492	12.7576	3.64464	3.50038	1.80751	0.0441	0.385776	up	9368	EBP50|NHERF|NHERF-1|NHERF1|NPHLOP2	MIM:604990|HGNC:HGNC:11075|Ensembl:ENSG00000109062|HPRD:05406|Vega:OTTHUMG00000178863	17	17q25.1	SLC9A3 regulator 1		GO:0031982(vesicle)//GO:0005886(plasma membrane)//GO:0015629(actin cytoskeleton)//GO:0048471(perinuclear region of cytoplasm)//GO:0032426(stereocilium tip)//GO:0016020(membrane)//GO:0071944(cell periphery)//GO:0012505(endomembrane system)//GO:0001726(ruffle)//GO:0030175(filopodium)//GO:0005813(centrosome)//GO:0043231(intracellular membrane-bounded organelle)//GO:0045121(membrane raft)//GO:0031526…	GO:0031698(beta-2 adrenergic receptor binding)//GO:0050780(dopamine receptor binding)//GO:0032403(protein complex binding)//GO:0019902(phosphatase binding)//GO:0008013(beta-catenin binding)//GO:0005102(receptor binding)//GO:0030165(PDZ domain binding)//GO:0017081(chloride channel regulator activity)//GO:0070851(growth factor receptor binding)//GO:0043621(protein self-association)//GO:0032947(prot…	GO:0010642(negative regulation of platelet-derived growth factor receptor signaling pathway)//GO:0014067(negative regulation of phosphatidylinositol 3-kinase signaling)//GO:0030033(microvillus assembly)//GO:0008285(negative regulation of cell proliferation)//GO:2001244(positive regulation of intrinsic apoptotic signaling pathway)//GO:0006461(protein complex assembly)//GO:0007605(sensory perceptio…
NAT9	ENSG00000109065	protein_coding	-	chr17:72766667-72772564	9.62247	4.18252	2.30063	1.20203	0.01235	0.207555	up	26151	EBSP, hNATL	HGNC:HGNC:23133|Ensembl:ENSG00000109065|HPRD:13259|Vega:OTTHUMG00000178870	17	17q25.1	N-acetyltransferase 9 (putative)		GO:0043234(protein complex)	GO:0005515(protein binding)//GO:0008080(N-acetyltransferase activity)	GO:0006474(N-terminal protein amino acid acetylation)//GO:0008152(metabolic process)
PMP22	ENSG00000109099	protein_coding	-	chr17:15133094-15169024	136.008	74.3039	1.83043	0.872183	0.0108	0.193394	up	5376	CMT1A|CMT1E|DSS|GAS-3|GAS3|HMSNIA|HNPP|Sp110	MIM:601097|HGNC:HGNC:9118|Ensembl:ENSG00000109099|HPRD:03059|Vega:OTTHUMG00000058960	17	17p12	peripheral myelin protein 22		GO:0005923(bicellular tight junction)//GO:0043218(compact myelin)//GO:0016021(integral component of membrane)//GO:0005886(plasma membrane)	GO:0005515(protein binding)	GO:0008219(cell death)//GO:0010977(negative regulation of neuron projection development)//GO:0007422(peripheral nervous system development)//GO:0007268(synaptic transmission)//GO:0008285(negative regulation of cell proliferation)//GO:0032060(bleb assembly)//GO:0032288(myelin assembly)
CPE	ENSG00000109472	protein_coding	+	chr4:166282345-166419472	60.1236	19.6848	3.05432	1.61085	0.0007	0.0383833	up	1363	CPH	MIM:114855|HGNC:HGNC:2303|Ensembl:ENSG00000109472|HPRD:00272|Vega:OTTHUMG00000150252	4	4q32.3	carboxypeptidase E	hsa04940(Type I diabetes mellitus)	GO:0030658(transport vesicle membrane)//GO:0097060(synaptic membrane)//GO:0005886(plasma membrane)//GO:0070062(extracellular exosome)//GO:0005794(Golgi apparatus)//GO:0030667(secretory granule membrane)//GO:0043025(neuronal cell body)//GO:0005634(nucleus)//GO:0005615(extracellular space)//GO:0030141(secretory granule)	GO:0008270(zinc ion binding)//GO:0004185(serine-type carboxypeptidase activity)//GO:0004181(metallocarboxypeptidase activity)//GO:0004180(carboxypeptidase activity)//GO:0042043(neurexin family protein binding)//GO:0050839(cell adhesion molecule binding)	GO:0044267(cellular protein metabolic process)//GO:0008152(metabolic process)//GO:0030070(insulin processing)//GO:0072657(protein localization to membrane)//GO:0016055(Wnt signaling pathway)//GO:0007218(neuropeptide signaling pathway)//GO:0003214(cardiac left ventricle morphogenesis)//GO:0006508(proteolysis)//GO:0006464(cellular protein modification process)
WFS1	ENSG00000109501	protein_coding	+	chr4:6271575-6304992	5.66587	1.48464	3.81634	1.93219	0.00415	0.117257	up	7466	CTRCT41|WFRS|WFS|WFSL	MIM:606201|HGNC:HGNC:12762|Ensembl:ENSG00000109501|HPRD:05864|Vega:OTTHUMG00000090431	4	4p16.1	wolframin ER transmembrane glycoprotein	hsa04141(Protein processing in endoplasmic reticulum)	GO:0016021(integral component of membrane)//GO:0030425(dendrite)//GO:0005789(endoplasmic reticulum membrane)//GO:0030176(integral component of endoplasmic reticulum membrane)//GO:0000502(proteasome complex)//GO:0005783(endoplasmic reticulum)	GO:0033613(activating transcription factor binding)//GO:0005515(protein binding)//GO:0031625(ubiquitin protein ligase binding)//GO:0051117(ATPase binding)	GO:0044267(cellular protein metabolic process)//GO:0045762(positive regulation of adenylate cyclase activity)//GO:0003091(renal water homeostasis)//GO:0000122(negative regulation of transcription from RNA polymerase II promoter)//GO:0050877(neurological system process)//GO:0001822(kidney development)//GO:0007605(sensory perception of sound)//GO:0022417(protein maturation by protein folding)//GO:1…
TRIM2	ENSG00000109654	protein_coding	+	chr4:154073493-154260472	30.5896	17.3574	1.76233	0.817488	0.0232	0.289047	up	23321	CMT2R|RNF86	MIM:614141|HGNC:HGNC:15974|Ensembl:ENSG00000109654|HPRD:10279|Vega:OTTHUMG00000155991	4	4q31.3	tripartite motif containing 2		GO:0005622(intracellular)//GO:0005737(cytoplasm)	GO:0016874(ligase activity)//GO:0004842(ubiquitin-protein transferase activity)//GO:0008270(zinc ion binding)//GO:0005515(protein binding)//GO:0061630(ubiquitin protein ligase activity)	GO:0043523(regulation of neuron apoptotic process)//GO:0016567(protein ubiquitination)
MFSD10	ENSG00000109736	protein_coding	-	chr4:2932287-2936586	2.24457	0.235443	9.53339	3.25299	0.0033	0.101516	up	10227	TETRAN|TETTRAN	MIM:610977|HGNC:HGNC:16894|Ensembl:ENSG00000109736|HPRD:10265|Vega:OTTHUMG00000122081	4	4p16.3	major facilitator superfamily domain containing 10		GO:0031526(brush border membrane)//GO:0016021(integral component of membrane)//GO:0030659(cytoplasmic vesicle membrane)	GO:0008493(tetracycline transporter activity)//GO:0008514(organic anion transmembrane transporter activity)	GO:0055085(transmembrane transport)//GO:0006810(transport)//GO:0006915(apoptotic process)//GO:0043252(sodium-independent organic anion transport)//GO:0015904(tetracycline transport)
PPARGC1A	ENSG00000109819	protein_coding	-	chr4:23562545-24474394	2.74412	0.774542	3.5429	1.82493	0.0219	0.279304	up	10891	LEM6|PGC-1(alpha)|PGC-1alpha|PGC-1v|PGC1|PGC1A|PPARGC1	MIM:604517|HGNC:HGNC:9237|Ensembl:ENSG00000109819|HPRD:05155|Vega:OTTHUMG00000097747	4	4p15.1	PPARG coactivator 1 alpha	hsa04152(AMPK signaling pathway)//	GO:1990844(interfibrillar mitochondrion)//GO:0005665(DNA-directed RNA polymerase II, core complex)//GO:0005719(nuclear euchromatin)//GO:1990843(subsarcolemmal mitochondrion)//GO:0097440(apical dendrite)//GO:0016605(PML body)//GO:0022626(cytosolic ribosome)//GO:0005654(nucleoplasm)//GO:0005634(nucleus)//GO:0043025(neuronal cell body)	GO:0030331(estrogen receptor binding)//GO:0043014(alpha-tubulin binding)//GO:0031490(chromatin DNA binding)//GO:0031625(ubiquitin protein ligase binding)//GO:1990841(promoter-specific chromatin binding)//GO:0003723(RNA binding)//GO:0030374(ligand-dependent nuclear receptor transcription coactivator activity)//GO:0001104(RNA polymerase II transcription cofactor activity)//GO:0050681(androgen recep…	GO:0042594(response to starvation)//GO:0071392(cellular response to estradiol stimulus)//GO:0008209(androgen metabolic process)//GO:0008380(RNA splicing)//GO:0097067(cellular response to thyroid hormone stimulus)//GO:0071372(cellular response to follicle-stimulating hormone stimulus)//GO:0001678(cellular glucose homeostasis)//GO:0045820(negative regulation of glycolytic process)//GO:0022904(respi…
CRYAB	ENSG00000109846	protein_coding	-	chr11:111779288-111797596	258.656	42.1363	6.13856	2.6179	0.00075	0.0403276	up	1410	CMD1II|CRYA2|CTPP2|CTRCT16|HEL-S-101|HSPB5|MFM2	MIM:123590|HGNC:HGNC:2389|Ensembl:ENSG00000109846|HPRD:00428|Vega:OTTHUMG00000166885	11	11q23.1	crystallin alpha B	hsa04141(Protein processing in endoplasmic reticulum)//	GO:0030018(Z disc)//GO:0005886(plasma membrane)//GO:0043209(myelin sheath)//GO:0032432(actin filament bundle)//GO:0009986(cell surface)//GO:0005794(Golgi apparatus)//GO:0005829(cytosol)//GO:0005739(mitochondrion)//GO:0015630(microtubule cytoskeleton)//GO:0070062(extracellular exosome)//GO:0005654(nucleoplasm)//GO:0005634(nucleus)//GO:0005737(cytoplasm)	GO:0005212(structural constituent of eye lens)//GO:0051082(unfolded protein binding)//GO:0042803(protein homodimerization activity)//GO:0042802(identical protein binding)//GO:0008017(microtubule binding)//GO:0046872(metal ion binding)//GO:0005515(protein binding)	GO:0007517(muscle organ development)//GO:0051260(protein homooligomerization)//GO:0032387(negative regulation of intracellular transport)//GO:0006457(protein folding)//GO:0060561(apoptotic process involved in morphogenesis)//GO:0043066(negative regulation of apoptotic process)//GO:0051403(stress-activated MAPK cascade)//GO:0031109(microtubule polymerization or depolymerization)//GO:0010629(negati…
SNX15	ENSG00000110025	protein_coding	+	chr11:64781584-64808044	4.80678	1.02691	4.68082	2.22676	0.01575	0.238301	up	29907	HSAF001435	MIM:605964|HGNC:HGNC:14978|Ensembl:ENSG00000110025|HPRD:12073|Vega:OTTHUMG00000037387	11	11q12	sorting nexin 15		GO:0030659(cytoplasmic vesicle membrane)//GO:0016020(membrane)//GO:0005829(cytosol)//GO:0043231(intracellular membrane-bounded organelle)//GO:0005730(nucleolus)//GO:0005737(cytoplasm)	GO:0005515(protein binding)//GO:0035091(phosphatidylinositol binding)//GO:0004674(protein serine/threonine kinase activity)	GO:0006468(protein phosphorylation)//GO:0006886(intracellular protein transport)//GO:0007165(signal transduction)
NRXN2	ENSG00000110076	protein_coding	-	chr11:64373645-64490660	4.64847	0.673571	6.90126	2.78686	0.01225	0.207253	up	9379	-	MIM:600566|HGNC:HGNC:8009|Ensembl:ENSG00000110076|HPRD:11859|Vega:OTTHUMG00000045214	11	11q13	neurexin 2	hsa04514(Cell adhesion molecules (CAMs))	GO:0005623(cell)//GO:0016021(integral component of membrane)//GO:0043234(protein complex)//GO:0042734(presynaptic membrane)	GO:0050839(cell adhesion molecule binding)//GO:0046872(metal ion binding)//GO:0097109(neuroligin family protein binding)//GO:0004888(transmembrane signaling receptor activity)//GO:0005246(calcium channel regulator activity)	GO:0097116(gephyrin clustering involved in postsynaptic density assembly)//GO:0042297(vocal learning)//GO:0007416(synapse assembly)//GO:0007158(neuron cell-cell adhesion)//GO:0035176(social behavior)//GO:0071625(vocalization behavior)//GO:0007268(synaptic transmission)//GO:0097104(postsynaptic membrane assembly)//GO:0007165(signal transduction)//GO:0097119(postsynaptic density protein 95 clusteri…
ST3GAL4	ENSG00000110080	protein_coding	+	chr11:126225534-126875953	6.45948	1.74058	3.71111	1.89185	0.01565	0.23733	up	6484	CGS23|NANTA3|SAT3|SIAT4|SIAT4C|ST3GalIV|STZ	MIM:104240|HGNC:HGNC:10864|Ensembl:ENSG00000110080|HPRD:00084|Vega:OTTHUMG00000165830	11	11q24.2	ST3 beta-galactoside alpha-2,3-sialyltransferase 4	hsa00601(Glycosphingolipid biosynthesis - lacto and neolacto series)//	GO:0016021(integral component of membrane)//GO:0070062(extracellular exosome)//GO:0016020(membrane)//GO:0005794(Golgi apparatus)//GO:0032580(Golgi cisterna membrane)//GO:0030173(integral component of Golgi membrane)//GO:0000139(Golgi membrane)	GO:0003836(beta-galactoside (CMP) alpha-2,3-sialyltransferase activity)//GO:0008373(sialyltransferase activity)//GO:0047288(monosialoganglioside sialyltransferase activity)	GO:0044267(cellular protein metabolic process)//GO:0044281(small molecule metabolic process)//GO:0006488(dolichol-linked oligosaccharide biosynthetic process)//GO:0016266(O-glycan processing)//GO:0009311(oligosaccharide metabolic process)//GO:0030203(glycosaminoglycan metabolic process)//GO:0006493(protein O-linked glycosylation)//GO:0018146(keratan sulfate biosynthetic process)//GO:0005975(carbo…
ACCS	ENSG00000110455	protein_coding	+	chr11:44087474-44105772	30.0575	7.7226	3.89216	1.96057	0.0005	0.031614	up	84680	ACS|PHACS	MIM:608405|HGNC:HGNC:23989|Ensembl:ENSG00000110455|HPRD:10524|Vega:OTTHUMG00000166427	11	11p11	1-aminocyclopropane-1-carboxylate synthase homolog (inactive)			GO:0030170(pyridoxal phosphate binding)//GO:0016847(1-aminocyclopropane-1-carboxylate synthase activity)//GO:0005515(protein binding)//GO:0042803(protein homodimerization activity)	GO:0009058(biosynthetic process)
NAA40	ENSG00000110583	protein_coding	+	chr11:63706430-63724800	8.78038	2.68785	3.26669	1.70783	0.0015	0.0657257	up	79829	NAT11|PATT1	HGNC:HGNC:25845|Ensembl:ENSG00000110583|HPRD:07838|Vega:OTTHUMG00000167784	11	11q13.1	N(alpha)-acetyltransferase 40, NatD catalytic subunit			GO:0008080(N-acetyltransferase activity)	GO:0006629(lipid metabolic process)
CD81	ENSG00000110651	protein_coding	+	chr11:2349978-2418649	231.835	105.989	2.18734	1.12918	0.0068	0.152772	up	975	CVID6|S5.7|TAPA1|TSPAN28	MIM:186845|HGNC:HGNC:1701|Ensembl:ENSG00000110651|HPRD:08924|Vega:OTTHUMG00000009892	11	11p15.5	CD81 molecule	hsa04662(B cell receptor signaling pathway)//hsa05144(Malaria)//hsa05160(Hepatitis C)	GO:0001772(immunological synapse)//GO:0016021(integral component of membrane)//GO:0005887(integral component of plasma membrane)//GO:0031982(vesicle)//GO:0016020(membrane)//GO:0005886(plasma membrane)//GO:0070062(extracellular exosome)//GO:0016324(apical plasma membrane)//GO:0005925(focal adhesion)	GO:0023026(MHC class II protein complex binding)//GO:1990459(transferrin receptor binding)//GO:0005515(protein binding)	GO:0030890(positive regulation of B cell proliferation)//GO:0008284(positive regulation of cell proliferation)//GO:1904352(positive regulation of protein catabolic process in the vacuole)//GO:0008104(protein localization)//GO:0045944(positive regulation of transcription from RNA polymerase II promoter)//GO:2000145(regulation of cell motility)//GO:0000187(activation of MAPK activity)//GO:0008283(c…
C11orf21	ENSG00000110665	protein_coding	-	chr11:2316874-2339430	2.59898	0.373292	6.96233	2.79957	0.02485	0.299791	up	29125	-	MIM:611033|HGNC:HGNC:13231	11	11p15.5	chromosome 11 open reading frame 21		GO:0005737(cytoplasm)
POU2AF1	ENSG00000110777	protein_coding	-	chr11:111222976-111328876	2.69485	0.0961747	28.0203	4.8084	0.04135	0.375697	up	5450	BOB1|OBF-1|OBF1|OCAB	MIM:601206|HGNC:HGNC:9211|Ensembl:ENSG00000110777|HPRD:03126|Vega:OTTHUMG00000166659	11	11q23.1	POU class 2 associating factor 1		GO:0005634(nucleus)	GO:0003713(transcription coactivator activity)//GO:0005515(protein binding)//GO:0003677(DNA binding)//GO:0003712(transcription cofactor activity)	GO:0006366(transcription from RNA polymerase II promoter)//GO:0006355(regulation of transcription, DNA-templated)//GO:0006959(humoral immune response)
PTPN5	ENSG00000110786	protein_coding	-	chr11:18714668-18814268	0.902051	0.0121614	74.1734	6.21283	0.0003	0.0221418	up	84867	PTPSTEP|STEP|STEP61	MIM:176879|HGNC:HGNC:9657|Ensembl:ENSG00000110786|HPRD:01472|Vega:OTTHUMG00000134304	11	11p15.1	protein tyrosine phosphatase, non-receptor type 5	hsa04010(MAPK signaling pathway)	GO:0016021(integral component of membrane)//GO:0043204(perikaryon)//GO:0005789(endoplasmic reticulum membrane)//GO:0030424(axon)//GO:0005829(cytosol)//GO:1990635(proximal dendrite)	GO:0051019(mitogen-activated protein kinase binding)//GO:0001784(phosphotyrosine binding)//GO:0035254(glutamate receptor binding)//GO:0005515(protein binding)//GO:0004725(protein tyrosine phosphatase activity)	GO:1903955(positive regulation of protein targeting to mitochondrion)//GO:0010976(positive regulation of neuron projection development)//GO:1900273(positive regulation of long-term synaptic potentiation)//GO:2001025(positive regulation of response to drug)//GO:0042493(response to drug)//GO:0002092(positive regulation of receptor internalization)//GO:1903492(response to acetylsalicylate)//GO:00331…
PRPF40B	ENSG00000110844	protein_coding	+	chr12:49962000-50158717	10.246	2.70459	3.78838	1.92158	0.02965	0.324795	up	25766	HYPC	HGNC:HGNC:25031|Ensembl:ENSG00000110844|HPRD:11044|Vega:OTTHUMG00000169568	12	12q13.12	pre-mRNA processing factor 40 homolog B	hsa03040(Spliceosome)	GO:0005685(U1 snRNP)//GO:0071004(U2-type prespliceosome)//GO:0016607(nuclear speck)	GO:0003723(RNA binding)	GO:0000398(mRNA splicing, via spliceosome)
SELPLG	ENSG00000110876	protein_coding	-	chr12:109015685-109035094	10.5924	4.60568	2.29985	1.20154	0.02585	0.30466	up	6404	CD162|CLA|PSGL-1|PSGL1	MIM:600738|HGNC:HGNC:10722|Ensembl:ENSG00000110876|HPRD:02845|Vega:OTTHUMG00000169411	12	12q24	selectin P ligand	hsa04514(Cell adhesion molecules (CAMs))//hsa05150(Staphylococcus aureus infection)	GO:0016020(membrane)//GO:0005886(plasma membrane)//GO:0005887(integral component of plasma membrane)//GO:0016021(integral component of membrane)//GO:0001931(uropod)	GO:0001618(virus receptor activity)//GO:0005102(receptor binding)//GO:0005515(protein binding)	GO:0007596(blood coagulation)//GO:0050902(leukocyte adhesive activation)//GO:0007155(cell adhesion)//GO:0046718(viral entry into host cell)//GO:0071354(cellular response to interleukin-6)//GO:0050901(leukocyte tethering or rolling)//GO:0050900(leukocyte migration)
TENC1	ENSG00000111077	protein_coding	+	chr12:53399941-53458162	44.0679	11.534	3.82071	1.93384	0.01905	0.261644	up
MANSC1	ENSG00000111261	protein_coding	-	chr12:12482197-12503475	6.55055	1.82118	3.59686	1.84674	0.03065	0.3287	up	54682	9130403P13Rik|LOH12CR3	HGNC:HGNC:25505|Ensembl:ENSG00000111261|HPRD:10067|Vega:OTTHUMG00000168541	12	12p13.2	MANSC domain containing 1		GO:0016021(integral component of membrane)
ALDH2	ENSG00000111275	protein_coding	+	chr12:112123856-112247782	109.754	36.392	3.01588	1.59258	0.0002	0.0161758	up	217	ALDH-E2|ALDHI|ALDM	MIM:100650|HGNC:HGNC:404|Ensembl:ENSG00000111275|HPRD:00003|Vega:OTTHUMG00000169603	12	12q24.2	aldehyde dehydrogenase 2 family (mitochondrial)	hsa00010(Glycolysis / Gluconeogenesis)//hsa00040(Pentose and glucuronate interconversions)//hsa00053(Ascorbate and aldarate metabolism)//hsa00071(Fatty acid degradation)//hsa00280(Valine, leucine and isoleucine degradation)//hsa00310(Lysine degradation)//hsa00330(Arginine and proline metabolism)//hsa00340(Histidine metabolism)//hsa00380(Tryptophan metabolism)//hsa00410(beta-Alanine metabolism)//h…	GO:0005759(mitochondrial matrix)//GO:0070062(extracellular exosome)	GO:0004030(aldehyde dehydrogenase [NAD(P)+] activity)//GO:0009055(electron carrier activity)//GO:0016620(oxidoreductase activity, acting on the aldehyde or oxo group of donors, NAD or NADP as acceptor)//GO:0004029(aldehyde dehydrogenase (NAD) activity)	GO:0055114(oxidation-reduction process)//GO:0044281(small molecule metabolic process)//GO:0042136(neurotransmitter biosynthetic process)//GO:0007268(synaptic transmission)//GO:0006066(alcohol metabolic process)//GO:0005975(carbohydrate metabolic process)//GO:0006069(ethanol oxidation)//GO:0006805(xenobiotic metabolic process)//GO:0006068(ethanol catabolic process)
OGFOD2	ENSG00000111325	protein_coding	+	chr12:123405497-123467456	3.50045	0.567982	6.16295	2.62362	5e-05	0.00584669	up	79676	-	HGNC:HGNC:25823|Ensembl:ENSG00000111325|HPRD:07829|Vega:OTTHUMG00000168778	12	12q24.31	2-oxoglutarate and iron-dependent oxygenase domain containing 2			GO:0005506(iron ion binding)//GO:0016705(oxidoreductase activity, acting on paired donors, with incorporation or reduction of molecular oxygen)//GO:0031418(L-ascorbic acid binding)//GO:0051213(dioxygenase activity)	GO:0055114(oxidation-reduction process)
SLC38A1	ENSG00000111371	protein_coding	-	chr12:46576845-46663800	16.5986	7.08935	2.34135	1.22734	0.00615	0.144876	up	81539	ATA1|NAT2|SAT1|SNAT1	MIM:608490|HGNC:HGNC:13447|Ensembl:ENSG00000111371|HPRD:12245|Vega:OTTHUMG00000169470	12	12q13.11	solute carrier family 38 member 1	hsa04724(Glutamatergic synapse)//hsa04727(GABAergic synapse)	GO:0005886(plasma membrane)//GO:0005887(integral component of plasma membrane)//GO:0030424(axon)//GO:0016021(integral component of membrane)//GO:0070062(extracellular exosome)	GO:0015182(L-asparagine transmembrane transporter activity)//GO:0015175(neutral amino acid transmembrane transporter activity)//GO:0015186(L-glutamine transmembrane transporter activity)//GO:0005290(L-histidine transmembrane transporter activity)//GO:0005283(sodium:amino acid symporter activity)//GO:0005515(protein binding)	GO:0015804(neutral amino acid transport)//GO:0015817(histidine transport)//GO:0007268(synaptic transmission)//GO:0001504(neurotransmitter uptake)//GO:0007565(female pregnancy)//GO:0006865(amino acid transport)//GO:0055085(transmembrane transport)//GO:0006814(sodium ion transport)//GO:0006868(glutamine transport)//GO:0003333(amino acid transmembrane transport)//GO:0089709(L-histidine transmembrane…
VDR	ENSG00000111424	protein_coding	-	chr12:48235319-48336831	6.74052	2.75788	2.44409	1.2893	0.0167	0.243908	up	7421	NR1I1|PPP1R163	MIM:601769|HGNC:HGNC:12679|Ensembl:ENSG00000111424|HPRD:03463|Vega:OTTHUMG00000169890	12	12q13.11	vitamin D (1,25- dihydroxyvitamin D3) receptor	hsa04961(Endocrine and other factor-regulated calcium reabsorption)//hsa04978(Mineral absorption)//hsa05152(Tuberculosis)	GO:0005654(nucleoplasm)//GO:0005634(nucleus)//GO:0090575(RNA polymerase II transcription factor complex)//GO:0043235(receptor complex)	GO:0008434(calcitriol receptor activity)//GO:0003700(transcription factor activity, sequence-specific DNA binding)//GO:0043565(sequence-specific DNA binding)//GO:0003707(steroid hormone receptor activity)//GO:1902098(calcitriol binding)//GO:0046965(retinoid X receptor binding)//GO:0008270(zinc ion binding)//GO:1902121(lithocholic acid binding)//GO:0070644(vitamin D response element binding)//GO:0…	GO:0006874(cellular calcium ion homeostasis)//GO:0046697(decidualization)//GO:0070561(vitamin D receptor signaling pathway)//GO:0060558(regulation of calcidiol 1-monooxygenase activity)//GO:0010839(negative regulation of keratinocyte proliferation)//GO:0038183(bile acid signaling pathway)//GO:0008285(negative regulation of cell proliferation)//GO:0000122(negative regulation of transcription from …
FZD10	ENSG00000111432	protein_coding	+	chr12:130647003-130650285	3.52489	1.29016	2.73214	1.45003	0.0272	0.312969	up	11211	CD350|FZ-10|Fz10|FzE7|hFz10	MIM:606147|HGNC:HGNC:4039|Ensembl:ENSG00000111432|HPRD:05853	12	12q24.33	frizzled class receptor 10	hsa04310(Wnt signaling pathway)//hsa04390(Hippo signaling pathway)//hsa04550(Signaling pathways regulating pluripotency of stem cells)//hsa04916(Melanogenesis)//hsa05166(HTLV-I infection)//hsa05200(Pathways in cancer)//hsa05205(Proteoglycans in cancer)//hsa05217(Basal cell carcinoma)	GO:0005887(integral component of plasma membrane)//GO:0009986(cell surface)//GO:0005737(cytoplasm)	GO:0005515(protein binding)//GO:0042813(Wnt-activated receptor activity)//GO:0004930(G-protein coupled receptor activity)//GO:0017147(Wnt-protein binding)	GO:0071300(cellular response to retinoic acid)//GO:0043507(positive regulation of JUN kinase activity)//GO:0032956(regulation of actin cytoskeleton organization)//GO:0034260(negative regulation of GTPase activity)//GO:0060070(canonical Wnt signaling pathway)//GO:0038031(non-canonical Wnt signaling pathway via JNK cascade)//GO:0043547(positive regulation of GTPase activity)//GO:0007186(G-protein c…
GPR133	ENSG00000111452	protein_coding	+	chr12:131438451-131626014	20.4313	4.52368	4.51651	2.17521	0.00025	0.0191053	up
PRKAB1	ENSG00000111725	protein_coding	+	chr12:119772516-120119435	10.8363	4.65824	2.32627	1.21802	0.0269	0.311549	up	5564	AMPK|HAMPKb	MIM:602740|HGNC:HGNC:9378|Ensembl:ENSG00000111725|HPRD:04116|Vega:OTTHUMG00000168954	12	12q24.1-q24.3	protein kinase AMP-activated non-catalytic subunit beta 1	hsa04068(FoxO signaling pathway)//hsa04152(AMPK signaling pathway)//	GO:0031588(nucleotide-activated protein kinase complex)//GO:0005634(nucleus)//GO:0005829(cytosol)	GO:0004672(protein kinase activity)//GO:0019901(protein kinase binding)//GO:0005515(protein binding)//GO:0004679(AMP-activated protein kinase activity)	GO:0061024(membrane organization)//GO:0016236(macroautophagy)//GO:0008286(insulin receptor signaling pathway)//GO:0007050(cell cycle arrest)//GO:0006468(protein phosphorylation)//GO:0010467(gene expression)//GO:0051291(protein heterooligomerization)//GO:0006996(organelle organization)//GO:0007005(mitochondrion organization)//GO:0006367(transcription initiation from RNA polymerase II promoter)//GO…
UST	ENSG00000111962	protein_coding	+	chr6:149068463-149398126	46.8789	16.8207	2.78697	1.4787	0.0077	0.161934	up	10090	2OST	MIM:610752|HGNC:HGNC:17223|Ensembl:ENSG00000111962|HPRD:10298|Vega:OTTHUMG00000016135	6	6q25.1	uronyl-2-sulfotransferase	hsa00532(Glycosaminoglycan biosynthesis - chondroitin sulfate / dermatan sulfate)	GO:0016021(integral component of membrane)//GO:0000139(Golgi membrane)	GO:0008146(sulfotransferase activity)	GO:0044281(small molecule metabolic process)//GO:0030208(dermatan sulfate biosynthetic process)//GO:0005975(carbohydrate metabolic process)//GO:0030204(chondroitin sulfate metabolic process)//GO:0030203(glycosaminoglycan metabolic process)//GO:0006477(protein sulfation)
BMP5	ENSG00000112175	protein_coding	-	chr6:55618442-55740362	18.4972	4.68834	3.94537	1.98016	0.0005	0.031614	up	653	-	MIM:112265|HGNC:HGNC:1072|Ensembl:ENSG00000112175|HPRD:00210|Vega:OTTHUMG00000014903	6	6p12.1	bone morphogenetic protein 5	hsa04350(TGF-beta signaling pathway)//hsa04390(Hippo signaling pathway)	GO:0031988(membrane-bounded vesicle)//GO:0005575(cellular_component)//GO:0005615(extracellular space)	GO:0070700(BMP receptor binding)//GO:0008083(growth factor activity)//GO:0005160(transforming growth factor beta receptor binding)//GO:0005125(cytokine activity)	GO:0010719(negative regulation of epithelial to mesenchymal transition)//GO:2000065(negative regulation of cortisol biosynthetic process)//GO:0008285(negative regulation of cell proliferation)//GO:1902042(negative regulation of extrinsic apoptotic signaling pathway via death domain receptors)//GO:0030509(BMP signaling pathway)//GO:0010862(positive regulation of pathway-restricted SMAD protein pho…
CCND3	ENSG00000112576	protein_coding	-	chr6:41902670-42018095	14.7027	5.15511	2.85205	1.512	0.0064	0.148246	up	896	-	MIM:123834|HGNC:HGNC:1585|Ensembl:ENSG00000112576|HPRD:00452|Vega:OTTHUMG00000014690	6	6p21	cyclin D3	hsa04110(Cell cycle)//hsa04115(p53 signaling pathway)//hsa04151(PI3K-Akt signaling pathway)//hsa04310(Wnt signaling pathway)//hsa04390(Hippo signaling pathway)//hsa04510(Focal adhesion)//hsa04630(Jak-STAT signaling pathway)//hsa05162(Measles)//hsa05166(HTLV-I infection)//hsa05203(Viral carcinogenesis)	GO:0000307(cyclin-dependent protein kinase holoenzyme complex)//GO:0005886(plasma membrane)//GO:0005737(cytoplasm)//GO:0005654(nucleoplasm)//GO:0005634(nucleus)//GO:0005925(focal adhesion)	GO:0019901(protein kinase binding)//GO:0004693(cyclin-dependent protein serine/threonine kinase activity)//GO:0005515(protein binding)	GO:0042098(T cell proliferation)//GO:0051301(cell division)//GO:0045737(positive regulation of cyclin-dependent protein serine/threonine kinase activity)//GO:0007049(cell cycle)//GO:0001934(positive regulation of protein phosphorylation)//GO:0007165(signal transduction)
TBP	ENSG00000112592	protein_coding	+	chr6:170863389-170881958	8.47462	1.55967	5.43361	2.44191	0.0309	0.329923	up	6908	GTF2D|GTF2D1|HDL4|SCA17|TFIID	MIM:600075|HGNC:HGNC:11588|Ensembl:ENSG00000112592|HPRD:02511|Vega:OTTHUMG00000016084	6	6q27	TATA-box binding protein	hsa03022(Basal transcription factors)//hsa05016(Huntington's disease)//hsa05166(HTLV-I infection)//hsa05168(Herpes simplex infection)//hsa05169(Epstein-Barr virus infection)//hsa05203(Viral carcinogenesis)	GO:0005672(transcription factor TFIIA complex)//GO:0005669(transcription factor TFIID complex)//GO:0005719(nuclear euchromatin)//GO:0005654(nucleoplasm)//GO:0001939(female pronucleus)//GO:0001940(male pronucleus)//GO:0005737(cytoplasm)	GO:0019899(enzyme binding)//GO:0003700(transcription factor activity, sequence-specific DNA binding)//GO:0000979(RNA polymerase II core promoter sequence-specific DNA binding)//GO:0000978(RNA polymerase II core promoter proximal region sequence-specific DNA binding)//GO:0044212(transcription regulatory region DNA binding)//GO:0070491(repressing transcription factor binding)//GO:0008134(transcript…	GO:0000183(chromatin silencing at rDNA)//GO:0045815(positive regulation of gene expression, epigenetic)//GO:0006367(transcription initiation from RNA polymerase II promoter)//GO:0006362(transcription elongation from RNA polymerase I promoter)//GO:0006360(transcription from RNA polymerase I promoter)//GO:0040029(regulation of gene expression, epigenetic)//GO:0010467(gene expression)//GO:0007283(sp…
CUL9	ENSG00000112659	protein_coding	+	chr6:43149912-43192325	15.0316	5.63886	2.66573	1.41453	0.02945	0.3237	up	23113	H7AP1|PARC	MIM:607489|HGNC:HGNC:15982|Ensembl:ENSG00000112659|HPRD:06317|Vega:OTTHUMG00000014723	6	6p21.1	cullin 9		GO:0031461(cullin-RING ubiquitin ligase complex)//GO:0005737(cytoplasm)	GO:0005524(ATP binding)//GO:0008270(zinc ion binding)//GO:0005515(protein binding)//GO:0031625(ubiquitin protein ligase binding)	GO:0016567(protein ubiquitination)//GO:0007088(regulation of mitotic nuclear division)//GO:0006511(ubiquitin-dependent protein catabolic process)//GO:0000226(microtubule cytoskeleton organization)
SLC29A1	ENSG00000112759	protein_coding	+	chr6:44187241-44201888	26.3407	10.0011	2.63379	1.39714	0.00645	0.148695	up	2030	ENT1	MIM:602193|HGNC:HGNC:11003|Ensembl:ENSG00000112759|HPRD:03724|Vega:OTTHUMG00000014759	6	6p21.1	solute carrier family 29 (equilibrative nucleoside transporter), member 1	hsa05034(Alcoholism)	GO:0098794(postsynapse)//GO:0005886(plasma membrane)//GO:0005887(integral component of plasma membrane)//GO:0016020(membrane)//GO:0016323(basolateral plasma membrane)//GO:0016324(apical plasma membrane)	GO:0005337(nucleoside transmembrane transporter activity)	GO:0007595(lactation)//GO:0060079(excitatory postsynaptic potential)//GO:0015858(nucleoside transport)//GO:0030431(sleep)//GO:1901642(nucleoside transmembrane transport)//GO:0071333(cellular response to glucose stimulus)//GO:0015862(uridine transport)//GO:0055085(transmembrane transport)//GO:0071456(cellular response to hypoxia)//GO:0006139(nucleobase-containing compound metabolic process)
CLIC5	ENSG00000112782	protein_coding	-	chr6:45866189-46048132	72.0637	11.8871	6.06236	2.59988	0.04425	0.385866	up	53405	DFNB102|DFNB103|MST130|MSTP130	MIM:607293|HGNC:HGNC:13517|Ensembl:ENSG00000112782|HPRD:06292|Vega:OTTHUMG00000014775	6	6p12.3	chloride intracellular channel 5		GO:0070062(extracellular exosome)//GO:0005938(cell cortex)//GO:0032420(stereocilium)//GO:0005815(microtubule organizing center)//GO:0015629(actin cytoskeleton)//GO:0005794(Golgi apparatus)//GO:0034707(chloride channel complex)//GO:0005634(nucleus)	GO:0005244(voltage-gated ion channel activity)//GO:0005515(protein binding)//GO:0005254(chloride channel activity)//GO:0004364(glutathione transferase activity)	GO:0006821(chloride transport)//GO:0060088(auditory receptor cell stereocilium organization)//GO:1902476(chloride transmembrane transport)//GO:0034765(regulation of ion transmembrane transport)//GO:0008104(protein localization)//GO:0007565(female pregnancy)//GO:0050885(neuromuscular process controlling balance)//GO:0006810(transport)//GO:0007605(sensory perception of sound)//GO:0002024(diet induc…
ENPP5	ENSG00000112796	protein_coding	-	chr6:46126923-46138708	5.34054	2.26421	2.35868	1.23798	0.04565	0.389671	up	59084	NPP-5	HGNC:HGNC:13717|Ensembl:ENSG00000112796|HPRD:13272|Vega:OTTHUMG00000014781	6	6p21.1-p11.2	ectonucleotide pyrophosphatase/phosphodiesterase 5 (putative)		GO:0005886(plasma membrane)//GO:0005576(extracellular region)//GO:0016021(integral component of membrane)	GO:0046872(metal ion binding)//GO:0016787(hydrolase activity)	GO:0008152(metabolic process)//GO:0007154(cell communication)
SEMA5A	ENSG00000112902	protein_coding	-	chr5:9001885-9546187	56.7124	30.2703	1.87353	0.90576	0.03885	0.367862	up	9037	SEMAF|semF	MIM:609297|HGNC:HGNC:10736|Ensembl:ENSG00000112902|HPRD:10219|Vega:OTTHUMG00000090501	5	5p15.2	semaphorin 5A	hsa04360(Axon guidance)	GO:0016020(membrane)//GO:0005886(plasma membrane)//GO:0070062(extracellular exosome)//GO:0016021(integral component of membrane)	GO:0035373(chondroitin sulfate proteoglycan binding)//GO:0008046(axon guidance receptor activity)//GO:0043395(heparan sulfate proteoglycan binding)//GO:0030215(semaphorin receptor binding)//GO:0045545(syndecan binding)//GO:0045499(chemorepellent activity)	GO:0048843(negative regulation of axon extension involved in axon guidance)//GO:0050918(positive chemotaxis)//GO:0050908(detection of light stimulus involved in visual perception)//GO:0048842(positive regulation of axon extension involved in axon guidance)//GO:2000352(negative regulation of endothelial cell apoptotic process)//GO:0045766(positive regulation of angiogenesis)//GO:0001569(patterning…
C7	ENSG00000112936	protein_coding	+	chr5:40909353-40983041	70.5253	31.6796	2.2262	1.15458	0.01285	0.213189	up	730	-	MIM:217070|HGNC:HGNC:1346|Ensembl:ENSG00000112936|HPRD:01957|Vega:OTTHUMG00000150340	5	5p13	complement component 7	hsa04610(Complement and coagulation cascades)//hsa05020(Prion diseases)//hsa05322(Systemic lupus erythematosus)	GO:0070062(extracellular exosome)//GO:0005576(extracellular region)//GO:0005579(membrane attack complex)		GO:0006957(complement activation, alternative pathway)//GO:0006958(complement activation, classical pathway)//GO:0045087(innate immune response)//GO:0019835(cytolysis)//GO:0030449(regulation of complement activation)//GO:0006956(complement activation)
PCDHB5	ENSG00000113209	protein_coding	+	chr5:140514799-140517703	1.35257	0.206547	6.54848	2.71116	0.0077	0.161934	up	26167	PCDH-BETA5	MIM:606331|HGNC:HGNC:8690|Ensembl:ENSG00000113209|HPRD:07560|Vega:OTTHUMG00000129616	5	5q31	protocadherin beta 5		GO:0005886(plasma membrane)//GO:0016021(integral component of membrane)	GO:0005509(calcium ion binding)	GO:0007416(synapse assembly)//GO:0007156(homophilic cell adhesion via plasma membrane adhesion molecules)//GO:0007268(synaptic transmission)//GO:0016339(calcium-dependent cell-cell adhesion via plasma membrane cell adhesion molecules)
PCDHB15	ENSG00000113248	protein_coding	+	chr5:140625146-140627799	1.90186	0.424084	4.48463	2.16499	0.02425	0.295862	up	56121	PCDH-BETA15	MIM:606341|HGNC:HGNC:8686|HPRD:06959	5	5q31	protocadherin beta 15		GO:0005886(plasma membrane)//GO:0005887(integral component of plasma membrane)	GO:0005509(calcium ion binding)	GO:0007399(nervous system development)//GO:0007156(homophilic cell adhesion via plasma membrane adhesion molecules)//GO:0007155(cell adhesion)
THBS4	ENSG00000113296	protein_coding	+	chr5:79287133-79379477	407.891	96.3132	4.23505	2.08238	0.00025	0.0191053	up	7060	TSP-4|TSP4	MIM:600715|HGNC:HGNC:11788|Ensembl:ENSG00000113296|HPRD:02836|Vega:OTTHUMG00000108173	5	5q13	thrombospondin 4	hsa04145(Phagosome)//hsa04151(PI3K-Akt signaling pathway)//hsa04510(Focal adhesion)//hsa04512(ECM-receptor interaction)//hsa05144(Malaria)	GO:0005604(basement membrane)//GO:0070062(extracellular exosome)//GO:0005576(extracellular region)//GO:0016529(sarcoplasmic reticulum)//GO:0031594(neuromuscular junction)//GO:0005783(endoplasmic reticulum)//GO:0031012(extracellular matrix)//GO:0005615(extracellular space)	GO:0008083(growth factor activity)//GO:0005518(collagen binding)//GO:0008201(heparin binding)//GO:0001968(fibronectin binding)//GO:0043237(laminin-1 binding)//GO:0005178(integrin binding)//GO:0005515(protein binding)//GO:0005509(calcium ion binding)	GO:0048771(tissue remodeling)//GO:0051260(protein homooligomerization)//GO:0090023(positive regulation of neutrophil chemotaxis)//GO:0007155(cell adhesion)//GO:0051451(myoblast migration)//GO:0071603(endothelial cell-cell adhesion)//GO:0006986(response to unfolded protein)//GO:0050731(positive regulation of peptidyl-tyrosine phosphorylation)//GO:0048812(neuron projection morphogenesis)//GO:003410…
DBN1	ENSG00000113758	protein_coding	-	chr5:176883608-176901402	7.03694	1.24894	5.63431	2.49424	0.0109	0.194825	up	1627	D0S117E	MIM:126660|HGNC:HGNC:2695|Ensembl:ENSG00000113758|HPRD:00545|Vega:OTTHUMG00000130856	5	5q35.3	drebrin 1		GO:0005886(plasma membrane)//GO:0005921(gap junction)//GO:0005938(cell cortex)//GO:0030425(dendrite)//GO:0015629(actin cytoskeleton)//GO:0042641(actomyosin)//GO:0030426(growth cone)//GO:0005622(intracellular)//GO:0005737(cytoplasm)	GO:0005515(protein binding)//GO:0003779(actin binding)//GO:0005522(profilin binding)	GO:0050773(regulation of dendrite development)//GO:0010643(cell communication by chemical coupling)//GO:0007015(actin filament organization)//GO:0048168(regulation of neuronal synaptic plasticity)//GO:0010644(cell communication by electrical coupling)//GO:0032507(maintenance of protein location in cell)//GO:0061351(neural precursor cell proliferation)
HGD	ENSG00000113924	protein_coding	-	chr3:120347019-120401418	1.70348	0.0501128	33.9929	5.08716	0.04335	0.382833	up	3081	AKU|HGO	MIM:607474|HGNC:HGNC:4892|Ensembl:ENSG00000113924|HPRD:06315|Vega:OTTHUMG00000159441	3	3q13.33	homogentisate 1,2-dioxygenase	hsa00350(Tyrosine metabolism)//	GO:0070062(extracellular exosome)//GO:0005829(cytosol)	GO:0004411(homogentisate 1,2-dioxygenase activity)//GO:0046872(metal ion binding)//GO:0005515(protein binding)	GO:0055114(oxidation-reduction process)//GO:0006570(tyrosine metabolic process)//GO:0044281(small molecule metabolic process)//GO:0006572(tyrosine catabolic process)//GO:0006559(L-phenylalanine catabolic process)//GO:0034641(cellular nitrogen compound metabolic process)
AMOTL2	ENSG00000114019	protein_coding	-	chr3:134070693-134094321	16.5007	5.87488	2.8087	1.4899	0.0021	0.0800847	up	51421	LCCP	MIM:614658|HGNC:HGNC:17812|Ensembl:ENSG00000114019|HPRD:16485|Vega:OTTHUMG00000159777	3	3q21-q22	angiomotin like 2		GO:0005923(bicellular tight junction)//GO:0055037(recycling endosome)//GO:0031410(cytoplasmic vesicle)//GO:0016324(apical plasma membrane)//GO:0005829(cytosol)	GO:0005515(protein binding)//GO:0042802(identical protein binding)	GO:0016055(Wnt signaling pathway)//GO:0035329(hippo signaling)
NIT2	ENSG00000114021	protein_coding	+	chr3:100053544-100075710	25.0592	10.0807	2.48585	1.31374	0.008	0.166261	up	56954	HEL-S-8a	MIM:616769|HGNC:HGNC:29878|HPRD:17634	3	3q12.2	nitrilase family member 2	hsa00250(Alanine, aspartate and glutamate metabolism)	GO:0005813(centrosome)//GO:0005739(mitochondrion)//GO:0005737(cytoplasm)//GO:0070062(extracellular exosome)	GO:0016810(hydrolase activity, acting on carbon-nitrogen (but not peptide) bonds)//GO:0050152(omega-amidase activity)	GO:0006528(asparagine metabolic process)//GO:0006807(nitrogen compound metabolic process)//GO:0006107(oxaloacetate metabolic process)//GO:0006541(glutamine metabolic process)
NPRL2	ENSG00000114388	protein_coding	-	chr3:50384760-50541675	4.98595	1.57269	3.17032	1.66463	0.04135	0.375697	up	10641	NPR2|NPR2L|TUSC4	MIM:607072|HGNC:HGNC:24969|Ensembl:ENSG00000114388|HPRD:06147|Vega:OTTHUMG00000156864	3	3p21.3	NPR2-like, GATOR1 complex subunit		GO:1990130(Iml1 complex)	GO:0004672(protein kinase activity)//GO:0005096(GTPase activator activity)//GO:0005515(protein binding)	GO:0032007(negative regulation of TOR signaling)//GO:0006468(protein phosphorylation)//GO:0033673(negative regulation of kinase activity)//GO:0034198(cellular response to amino acid starvation)//GO:0043547(positive regulation of GTPase activity)
SLC41A3	ENSG00000114544	protein_coding	-	chr3:125725197-125820404	8.9359	1.07858	8.28488	3.05048	5e-05	0.00584669	up	54946	SLC41A1-L2	MIM:610803|HGNC:HGNC:31046|Ensembl:ENSG00000114544|HPRD:11580|Vega:OTTHUMG00000162678	3	3q21.2	solute carrier family 41 member 3		GO:0016021(integral component of membrane)//GO:0005886(plasma membrane)	GO:0005515(protein binding)//GO:0008324(cation transmembrane transporter activity)	GO:0098655(cation transmembrane transport)
ABTB1	ENSG00000114626	protein_coding	+	chr3:127391777-127399768	7.90133	2.34643	3.36739	1.75163	0.02145	0.276199	up	80325	BPOZ|BTB3|BTBD21|EF1ABP|PP2259	MIM:608308|HGNC:HGNC:18275|Ensembl:ENSG00000114626|HPRD:10513|Vega:OTTHUMG00000159636	3	3q21	ankyrin repeat and BTB domain containing 1		GO:0005730(nucleolus)//GO:0005886(plasma membrane)//GO:0005737(cytoplasm)	GO:0003746(translation elongation factor activity)//GO:0005515(protein binding)	GO:0006414(translational elongation)
ARHGEF26	ENSG00000114790	protein_coding	+	chr3:153742189-153975616	4.91167	1.42152	3.45523	1.78878	0.0059	0.143515	up	26084	CSGEF|HMFN1864|SGEF	HGNC:HGNC:24490|Ensembl:ENSG00000114790|HPRD:11554|Vega:OTTHUMG00000159098	3	3q25.2	Rho guanine nucleotide exchange factor 26	hsa05100(Bacterial invasion of epithelial cells)	GO:0001726(ruffle)	GO:0005089(Rho guanyl-nucleotide exchange factor activity)	GO:0097178(ruffle assembly)//GO:0001886(endothelial cell morphogenesis)//GO:0035023(regulation of Rho protein signal transduction)//GO:0043547(positive regulation of GTPase activity)
VIPR1	ENSG00000114812	protein_coding	+	chr3:42530790-42579059	10.5736	1.5747	6.71469	2.74732	5e-05	0.00584669	up	7433	HVR1|II|PACAP-R-2|PACAP-R2|RDC1|V1RG|VAPC1|VIP-R-1|VIPR|VIRG|VPAC1|VPAC1R|VPCAP1R	MIM:192321|HGNC:HGNC:12694|Ensembl:ENSG00000114812|HPRD:01890|Vega:OTTHUMG00000131792	3	3p22	vasoactive intestinal peptide receptor 1	hsa04080(Neuroactive ligand-receptor interaction)	GO:0016021(integral component of membrane)//GO:0005887(integral component of plasma membrane)//GO:0005886(plasma membrane)//GO:0043235(receptor complex)	GO:0004999(vasoactive intestinal polypeptide receptor activity)//GO:0005515(protein binding)	GO:0008284(positive regulation of cell proliferation)//GO:0007586(digestion)//GO:0007268(synaptic transmission)//GO:0006936(muscle contraction)//GO:0007166(cell surface receptor signaling pathway)//GO:0007187(G-protein coupled receptor signaling pathway, coupled to cyclic nucleotide second messenger)//GO:0006955(immune response)//GO:0007186(G-protein coupled receptor signaling pathway)
FAHD2A	ENSG00000115042	protein_coding	+	chr2:96068468-96082364	9.91896	2.9246	3.39156	1.76195	0.02565	0.303814	up	51011	CGI-105	HGNC:HGNC:24252|Ensembl:ENSG00000115042|HPRD:13287|Vega:OTTHUMG00000130397	2	2q11.2	fumarylacetoacetate hydrolase domain containing 2A			GO:0003824(catalytic activity)//GO:0046872(metal ion binding)//GO:0016787(hydrolase activity)	GO:0008152(metabolic process)
TTC31	ENSG00000115282	protein_coding	+	chr2:74699084-74722013	10.5333	4.79977	2.19456	1.13393	0.03545	0.352701	up	64427	-	HGNC:HGNC:25759|Ensembl:ENSG00000115282|HPRD:07797|Vega:OTTHUMG00000152887	2	2p13.1	tetratricopeptide repeat domain 31
GALNT3	ENSG00000115339	protein_coding	-	chr2:166604100-166651192	12.2343	3.08992	3.95942	1.98529	0.00245	0.0867828	up	2591	GalNAc-T3|HFTC|HHS	MIM:601756|HGNC:HGNC:4125|Ensembl:ENSG00000115339|HPRD:03453|Vega:OTTHUMG00000132157	2	2q24-q31	polypeptide N-acetylgalactosaminyltransferase 3	hsa00512(Mucin type O-Glycan biosynthesis)//	GO:0016021(integral component of membrane)//GO:0070062(extracellular exosome)//GO:0016020(membrane)//GO:0048471(perinuclear region of cytoplasm)//GO:0005794(Golgi apparatus)//GO:0032580(Golgi cisterna membrane)//GO:0000139(Golgi membrane)	GO:0004653(polypeptide N-acetylgalactosaminyltransferase activity)//GO:0030246(carbohydrate binding)//GO:0030145(manganese ion binding)//GO:0005515(protein binding)//GO:0005509(calcium ion binding)	GO:0044267(cellular protein metabolic process)//GO:0018242(protein O-linked glycosylation via serine)//GO:0016266(O-glycan processing)//GO:0006493(protein O-linked glycosylation)//GO:0005975(carbohydrate metabolic process)//GO:0018243(protein O-linked glycosylation via threonine)//GO:0043687(post-translational protein modification)
ACADL	ENSG00000115361	protein_coding	-	chr2:211036241-211095107	13.4314	2.50831	5.35479	2.42083	0.00395	0.113928	up	33	ACAD4|LCAD	MIM:609576|HGNC:HGNC:88|Ensembl:ENSG00000115361|HPRD:01939|Vega:OTTHUMG00000132989	2	2q34	acyl-CoA dehydrogenase, long chain	hsa00071(Fatty acid degradation)//	GO:0031966(mitochondrial membrane)//GO:0005739(mitochondrion)//GO:0005759(mitochondrial matrix)	GO:0052890(oxidoreductase activity, acting on the CH-CH group of donors, with a flavin as acceptor)//GO:0003995(acyl-CoA dehydrogenase activity)//GO:0016401(palmitoyl-CoA oxidase activity)//GO:0009055(electron carrier activity)//GO:0000062(fatty-acyl-CoA binding)//GO:0004466(long-chain-acyl-CoA dehydrogenase activity)//GO:0050660(flavin adenine dinucleotide binding)	GO:0044255(cellular lipid metabolic process)//GO:0055114(oxidation-reduction process)//GO:0006635(fatty acid beta-oxidation)//GO:0044281(small molecule metabolic process)//GO:0051289(protein homotetramerization)//GO:0045717(negative regulation of fatty acid biosynthetic process)//GO:0019254(carnitine metabolic process, CoA-linked)//GO:0046322(negative regulation of fatty acid oxidation)//GO:00550…
MLPH	ENSG00000115648	protein_coding	+	chr2:238394070-238463961	11.2726	2.50444	4.50105	2.17026	0.00185	0.0746577	up	79083	SLAC2-A	MIM:606526|HGNC:HGNC:29643|Ensembl:ENSG00000115648|HPRD:09409|Vega:OTTHUMG00000133298	2	2q37.3	melanophilin		GO:0005622(intracellular)//GO:0030425(dendrite)//GO:0048471(perinuclear region of cytoplasm)//GO:0070062(extracellular exosome)	GO:0017137(Rab GTPase binding)//GO:0046872(metal ion binding)//GO:0005515(protein binding)	GO:0006886(intracellular protein transport)
STK25	ENSG00000115694	protein_coding	-	chr2:242295657-242449145	32.1631	9.73546	3.30369	1.72408	0.02455	0.297651	up	10494	SOK1|YSK1	MIM:602255|HGNC:HGNC:11404|Ensembl:ENSG00000115694|HPRD:03770|Vega:OTTHUMG00000133408	2	2q37.3	serine/threonine kinase 25		GO:0070062(extracellular exosome)//GO:0005794(Golgi apparatus)//GO:0000139(Golgi membrane)//GO:0005737(cytoplasm)	GO:0004674(protein serine/threonine kinase activity)//GO:0042803(protein homodimerization activity)//GO:0004672(protein kinase activity)//GO:0005524(ATP binding)//GO:0046872(metal ion binding)//GO:0005515(protein binding)	GO:0090168(Golgi reassembly)//GO:0051683(establishment of Golgi localization)//GO:0007346(regulation of mitotic cell cycle)//GO:0032147(activation of protein kinase activity)//GO:0006979(response to oxidative stress)//GO:0006468(protein phosphorylation)//GO:0007163(establishment or maintenance of cell polarity)//GO:0032874(positive regulation of stress-activated MAPK cascade)//GO:0042981(regulati…
TPO	ENSG00000115705	protein_coding	+	chr2:1377994-1547483	15.6698	1.67928	9.33125	3.22207	0.00345	0.104474	up	7173	MSA|TDH2A|TPX	MIM:606765|HGNC:HGNC:12015|Ensembl:ENSG00000115705|HPRD:06000|Vega:OTTHUMG00000090271	2	2p25	thyroid peroxidase	hsa00350(Tyrosine metabolism)//	GO:0005886(plasma membrane)//GO:0005887(integral component of plasma membrane)//GO:0009986(cell surface)//GO:0016021(integral component of membrane)//GO:0005739(mitochondrion)//GO:0005615(extracellular space)	GO:0020037(heme binding)//GO:0004601(peroxidase activity)//GO:0004447(iodide peroxidase activity)//GO:0005509(calcium ion binding)	GO:0055114(oxidation-reduction process)//GO:0035162(embryonic hemopoiesis)//GO:0044281(small molecule metabolic process)//GO:0033993(response to lipid)//GO:0006979(response to oxidative stress)//GO:0042744(hydrogen peroxide catabolic process)//GO:0071732(cellular response to nitric oxide)//GO:0098869(cellular oxidant detoxification)//GO:0034641(cellular nitrogen compound metabolic process)//GO:00…
ARID3A	ENSG00000116017	protein_coding	+	chr19:925780-975939	3.98301	1.51276	2.63293	1.39667	0.04275	0.380651	up	1820	BRIGHT|DRIL1|DRIL3|E2FBP1	MIM:603265|HGNC:HGNC:3031|HPRD:10343	19	19p13.3	AT-rich interaction domain 3A		GO:0005654(nucleoplasm)//GO:0045121(membrane raft)//GO:0005794(Golgi apparatus)//GO:0005737(cytoplasm)//GO:0005730(nucleolus)	GO:0042803(protein homodimerization activity)//GO:0003682(chromatin binding)//GO:0000977(RNA polymerase II regulatory region sequence-specific DNA binding)//GO:0001228(transcriptional activator activity, RNA polymerase II transcription regulatory region sequence-specific binding)//GO:0005515(protein binding)//GO:0003677(DNA binding)	GO:0006366(transcription from RNA polymerase II promoter)//GO:0045944(positive regulation of transcription from RNA polymerase II promoter)
MARK1	ENSG00000116141	protein_coding	+	chr1:220701567-220837803	19.5174	3.05316	6.39254	2.67639	0.01795	0.253004	up	4139	MARK|Par-1c|Par1c	MIM:606511|HGNC:HGNC:6896|Ensembl:ENSG00000116141|HPRD:07353|Vega:OTTHUMG00000037351	1	1q41	microtubule affinity regulating kinase 1		GO:0005886(plasma membrane)//GO:0005856(cytoskeleton)//GO:0005737(cytoplasm)//GO:0015630(microtubule cytoskeleton)	GO:0005546(phosphatidylinositol-4,5-bisphosphate binding)//GO:0004674(protein serine/threonine kinase activity)//GO:0005524(ATP binding)//GO:0000287(magnesium ion binding)//GO:0004672(protein kinase activity)//GO:0001786(phosphatidylserine binding)//GO:0050321(tau-protein kinase activity)//GO:0070300(phosphatidic acid binding)	GO:0007010(cytoskeleton organization)//GO:0006468(protein phosphorylation)//GO:0000226(microtubule cytoskeleton organization)//GO:0001764(neuron migration)//GO:0035556(intracellular signal transduction)//GO:0016055(Wnt signaling pathway)
DNAJC6	ENSG00000116675	protein_coding	+	chr1:65713901-65881689	2.39709	0.44853	5.3443	2.418	0.00545	0.136503	up	9829	DJC6|PARK19	MIM:608375|HGNC:HGNC:15469|Ensembl:ENSG00000116675|HPRD:16326|Vega:OTTHUMG00000009066	1	1p31.3	DnaJ heat shock protein family (Hsp40) member C6	hsa04144(Endocytosis)	GO:0097481(neuronal postsynaptic density)//GO:0005829(cytosol)	GO:0017124(SH3 domain binding)//GO:0004725(protein tyrosine phosphatase activity)	GO:0061024(membrane organization)//GO:2000369(regulation of clathrin-mediated endocytosis)//GO:0035335(peptidyl-tyrosine dephosphorylation)//GO:0006892(post-Golgi vesicle-mediated transport)//GO:0072318(clathrin coat disassembly)
TNNI3K	ENSG00000116783	protein_coding	+	chr1:74663895-75010112	5.69355	0.632102	9.00733	3.1711	0.0053	0.134131	up	51086	CARK|CCDD	MIM:613932|HGNC:HGNC:19661|Ensembl:ENSG00000116783|HPRD:18208|Vega:OTTHUMG00000171318	1	1p31.1	TNNI3 interacting kinase		GO:0005634(nucleus)//GO:0005737(cytoplasm)	GO:0004674(protein serine/threonine kinase activity)//GO:0004672(protein kinase activity)//GO:0005524(ATP binding)//GO:0008022(protein C-terminus binding)//GO:0046872(metal ion binding)//GO:0005515(protein binding)//GO:0031013(troponin I binding)	GO:0055117(regulation of cardiac muscle contraction)//GO:0006468(protein phosphorylation)//GO:0002027(regulation of heart rate)//GO:0086069(bundle of His cell to Purkinje myocyte communication)//GO:1903779(regulation of cardiac conduction)
CD2	ENSG00000116824	protein_coding	+	chr1:117297006-117311850	37.8585	7.68538	4.92605	2.30043	0.0004	0.0273394	up	914	LFA-2|SRBC|T11	MIM:186990|HGNC:HGNC:1639|Ensembl:ENSG00000116824|HPRD:01750|Vega:OTTHUMG00000022750	1	1p13.1	CD2 molecule	hsa04514(Cell adhesion molecules (CAMs))//hsa04640(Hematopoietic cell lineage)	GO:0005886(plasma membrane)//GO:0005887(integral component of plasma membrane)//GO:0005576(extracellular region)//GO:0009898(cytoplasmic side of plasma membrane)//GO:0009986(cell surface)//GO:0009897(external side of plasma membrane)//GO:0046658(anchored component of plasma membrane)//GO:0005911(cell-cell junction)	GO:0004872(receptor activity)//GO:0005102(receptor binding)//GO:0005515(protein binding)//GO:0042803(protein homodimerization activity)	GO:0050900(leukocyte migration)//GO:1902715(positive regulation of interferon-gamma secretion)//GO:0030887(positive regulation of myeloid dendritic cell activation)//GO:2000484(positive regulation of interleukin-8 secretion)//GO:0007596(blood coagulation)//GO:0045580(regulation of T cell differentiation)//GO:0042110(T cell activation)//GO:0034113(heterotypic cell-cell adhesion)//GO:0007166(cell s…
KIF21B	ENSG00000116852	protein_coding	-	chr1:200938519-200992828	2.40494	0.520882	4.61705	2.20697	0.0068	0.152772	up	23046	-	MIM:608322|HGNC:HGNC:29442|Ensembl:ENSG00000116852|Vega:OTTHUMG00000035787	1	1q32.1	kinesin family member 21B		GO:0005871(kinesin complex)//GO:0005874(microtubule)//GO:0005737(cytoplasm)	GO:0005524(ATP binding)//GO:0008017(microtubule binding)//GO:0016887(ATPase activity)//GO:0003777(microtubule motor activity)	GO:0008152(metabolic process)//GO:0007018(microtubule-based movement)
CDK18	ENSG00000117266	protein_coding	+	chr1:205473722-205501921	2.63988	0.924549	2.85532	1.51365	0.02495	0.300294	up	5129	PCTAIRE|PCTAIRE3|PCTK3	MIM:169190|HGNC:HGNC:8751|Ensembl:ENSG00000117266|HPRD:01354|Vega:OTTHUMG00000037203	1	1q31-q32	cyclin-dependent kinase 18		GO:0005575(cellular_component)	GO:0004672(protein kinase activity)//GO:0005524(ATP binding)//GO:0004693(cyclin-dependent protein serine/threonine kinase activity)//GO:0005515(protein binding)	GO:0006468(protein phosphorylation)//GO:0051726(regulation of cell cycle)
TXNIP	ENSG00000117289	protein_coding	+	chr1:145438468-145442635	679.803	330.323	2.058	1.04124	0.02435	0.296337	up	10628	EST01027|HHCPA78|THIF|VDUP1	MIM:606599|HGNC:HGNC:16952|Ensembl:ENSG00000265972|HPRD:05964|Vega:OTTHUMG00000013755	1	1q21.1	thioredoxin interacting protein		GO:0005634(nucleus)//GO:0005758(mitochondrial intermembrane space)//GO:0005737(cytoplasm)//GO:0005829(cytosol)	GO:0005515(protein binding)//GO:0031625(ubiquitin protein ligase binding)//GO:0004857(enzyme inhibitor activity)	GO:0048008(platelet-derived growth factor receptor signaling pathway)//GO:0043086(negative regulation of catalytic activity)//GO:0006606(protein import into nucleus)//GO:0035872(nucleotide-binding domain, leucine rich repeat containing receptor signaling pathway)//GO:0032570(response to progesterone)//GO:0045087(innate immune response)//GO:0009749(response to glucose)//GO:0030216(keratinocyte dif…
ECE1	ENSG00000117298	protein_coding	-	chr1:21543739-21671997	48.4038	18.4796	2.61932	1.38919	0.00595	0.143963	up	1889	ECE	MIM:600423|HGNC:HGNC:3146|Ensembl:ENSG00000117298|HPRD:02690|Vega:OTTHUMG00000002625	1	1p36.1	endothelin converting enzyme 1		GO:0005768(endosome)//GO:0016021(integral component of membrane)//GO:0048471(perinuclear region of cytoplasm)//GO:0005886(plasma membrane)//GO:0016020(membrane)//GO:0033093(Weibel-Palade body)//GO:0009897(external side of plasma membrane)//GO:0005765(lysosomal membrane)//GO:0070062(extracellular exosome)//GO:0031302(intrinsic component of endosome membrane)//GO:0005769(early endosome)//GO:0031982…	GO:0017046(peptide hormone binding)//GO:0042803(protein homodimerization activity)//GO:0004175(endopeptidase activity)//GO:0004222(metalloendopeptidase activity)//GO:0046872(metal ion binding)//GO:0005515(protein binding)	GO:0060037(pharyngeal system development)//GO:0010815(bradykinin catabolic process)//GO:0001921(positive regulation of receptor recycling)//GO:0030819(positive regulation of cAMP biosynthetic process)//GO:0042447(hormone catabolic process)//GO:0042312(regulation of vasodilation)//GO:0046686(response to cadmium ion)//GO:0035994(response to muscle stretch)//GO:0007507(heart development)//GO:0034959…
HMGCL	ENSG00000117305	protein_coding	-	chr1:24128374-24165110	15.4866	5.284	2.93085	1.55132	0.01065	0.192483	up	3155	HL	MIM:613898|HGNC:HGNC:5005|Ensembl:ENSG00000117305|HPRD:02003|Vega:OTTHUMG00000002963	1	1p36.1-p35	3-hydroxymethyl-3-methylglutaryl-CoA lyase	hsa00072(Synthesis and degradation of ketone bodies)//hsa00280(Valine, leucine and isoleucine degradation)//hsa00650(Butanoate metabolism)//	GO:0005743(mitochondrial inner membrane)//GO:0005739(mitochondrion)//GO:0005759(mitochondrial matrix)//GO:0005777(peroxisome)	GO:0042803(protein homodimerization activity)//GO:0005102(receptor binding)//GO:0000287(magnesium ion binding)//GO:0004419(hydroxymethylglutaryl-CoA lyase activity)//GO:0000062(fatty-acyl-CoA binding)//GO:0030145(manganese ion binding)//GO:0046872(metal ion binding)//GO:0031406(carboxylic acid binding)	GO:0046951(ketone body biosynthetic process)//GO:0042594(response to starvation)//GO:0070542(response to fatty acid)//GO:0044281(small molecule metabolic process)//GO:0001889(liver development)//GO:0006552(leucine catabolic process)//GO:0051262(protein tetramerization)//GO:0046950(cellular ketone body metabolic process)//GO:0007005(mitochondrion organization)//GO:0007584(response to nutrient)//GO…
TSPAN1	ENSG00000117472	protein_coding	+	chr1:46505811-46651630	1.49171	0.16491	9.04562	3.17722	0.01805	0.25334	up	10103	NET1|TM4C|TM4SF	MIM:613170|HGNC:HGNC:20657|Ensembl:ENSG00000117472|HPRD:18232|Vega:OTTHUMG00000007602	1	1p34.1	tetraspanin 1		GO:0005886(plasma membrane)//GO:0005887(integral component of plasma membrane)//GO:0016020(membrane)//GO:0048471(perinuclear region of cytoplasm)//GO:0005765(lysosomal membrane)//GO:0070062(extracellular exosome)//GO:0005737(cytoplasm)//GO:0031982(vesicle)	GO:0005515(protein binding)	GO:0045807(positive regulation of endocytosis)//GO:0050821(protein stabilization)//GO:0008283(cell proliferation)//GO:0007166(cell surface receptor signaling pathway)//GO:0016477(cell migration)
TNFSF4	ENSG00000117586	protein_coding	-	chr1:173152872-173176452	2.76653	1.02799	2.6912	1.42825	0.04525	0.388306	up	7292	CD134L|CD252|GP34|OX-40L|OX4OL|TNLG2B|TXGP1	MIM:603594|HGNC:HGNC:11934|Ensembl:ENSG00000117586|HPRD:04668|Vega:OTTHUMG00000034838	1	1q25	tumor necrosis factor superfamily member 4	hsa04060(Cytokine-cytokine receptor interaction)	GO:0005886(plasma membrane)//GO:0005887(integral component of plasma membrane)//GO:0005615(extracellular space)//GO:0009986(cell surface)	GO:0005102(receptor binding)//GO:0032813(tumor necrosis factor receptor superfamily binding)//GO:0005164(tumor necrosis factor receptor binding)//GO:0005125(cytokine activity)	GO:0046641(positive regulation of alpha-beta T cell proliferation)//GO:0002215(defense response to nematode)//GO:0071954(chemokine (C-C motif) ligand 11 production)//GO:0042104(positive regulation of activated T cell proliferation)//GO:0043382(positive regulation of memory T cell differentiation)//GO:0045626(negative regulation of T-helper 1 cell differentiation)//GO:0002819(regulation of adaptiv…
CNR1	ENSG00000118432	protein_coding	-	chr6:88849582-88876078	2.55184	1.15378	2.21172	1.14517	0.03815	0.364793	up	1268	CANN6|CB-R|CB1|CB1A|CB1K5|CB1R|CNR	MIM:114610|HGNC:HGNC:2159|Ensembl:ENSG00000118432|HPRD:00259|Vega:OTTHUMG00000015184	6	6q14-q15	cannabinoid receptor 1 (brain)	hsa04015(Rap1 signaling pathway)//hsa04080(Neuroactive ligand-receptor interaction)//hsa04723(Retrograde endocannabinoid signaling)	GO:0016021(integral component of membrane)//GO:0005887(integral component of plasma membrane)//GO:0030424(axon)//GO:0005886(plasma membrane)//GO:0043231(intracellular membrane-bounded organelle)//GO:0045121(membrane raft)//GO:0030426(growth cone)	GO:0004949(cannabinoid receptor activity)//GO:0008144(drug binding)	GO:0042220(response to cocaine)//GO:0010976(positive regulation of neuron projection development)//GO:0060405(regulation of penile erection)//GO:0038171(cannabinoid signaling pathway)//GO:0031999(negative regulation of fatty acid beta-oxidation)//GO:0007283(spermatogenesis)//GO:0031622(positive regulation of fever generation)//GO:0060259(regulation of feeding behavior)//GO:0007187(G-protein coupl…
ADGB	ENSG00000118492	protein_coding	+	chr6:146920100-147136598	1.0922	0	inf	inf	0.0186	0.258073	up	79747	C6orf103|CAPN16	MIM:614630|HGNC:HGNC:21212|Ensembl:ENSG00000118492|Vega:OTTHUMG00000015758	6	6q24.3	androglobin		GO:0005622(intracellular)	GO:0004198(calcium-dependent cysteine-type endopeptidase activity)//GO:0020037(heme binding)//GO:0019825(oxygen binding)	GO:0006508(proteolysis)
SLC16A7	ENSG00000118596	protein_coding	+	chr12:59989847-60176395	42.6624	22.5164	1.89473	0.92199	0.0351	0.352289	up	9194	MCT2	MIM:603654|HGNC:HGNC:10928|Ensembl:ENSG00000118596|HPRD:06791|Vega:OTTHUMG00000169923	12	12q13	solute carrier family 16 (monocarboxylate transporter), member 7		GO:0005886(plasma membrane)//GO:0005887(integral component of plasma membrane)//GO:0005737(cytoplasm)	GO:0008028(monocarboxylic acid transmembrane transporter activity)//GO:0015293(symporter activity)//GO:0050833(pyruvate transmembrane transporter activity)//GO:0005477(pyruvate secondary active transmembrane transporter activity)//GO:0015129(lactate transmembrane transporter activity)	GO:0055085(transmembrane transport)//GO:0035873(lactate transmembrane transport)//GO:0035879(plasma membrane lactate transport)//GO:1901475(pyruvate transmembrane transport)
KLF12	ENSG00000118922	protein_coding	-	chr13:74260225-74708394	25.5874	13.6615	1.87296	0.905317	0.02165	0.277575	up	11278	AP-2rep|AP2REP|HSPC122	MIM:607531|HGNC:HGNC:6346|Ensembl:ENSG00000118922|HPRD:06336|Vega:OTTHUMG00000017078	13	13q22	Kruppel-like factor 12		GO:0005654(nucleoplasm)//GO:0005737(cytoplasm)	GO:0003676(nucleic acid binding)//GO:0001227(transcriptional repressor activity, RNA polymerase II transcription regulatory region sequence-specific binding)//GO:0003700(transcription factor activity, sequence-specific DNA binding)//GO:0000977(RNA polymerase II regulatory region sequence-specific DNA binding)//GO:0003714(transcription corepressor activity)//GO:0046872(metal ion binding)//GO:00055…	GO:0006357(regulation of transcription from RNA polymerase II promoter)//GO:0006351(transcription, DNA-templated)//GO:0045944(positive regulation of transcription from RNA polymerase II promoter)//GO:0000122(negative regulation of transcription from RNA polymerase II promoter)
SATB2	ENSG00000119042	protein_coding	-	chr2:200134222-200341658	22.624	3.53317	6.40332	2.67882	0.0001	0.0101099	up	23314	GLSS	MIM:608148|HGNC:HGNC:21637|Ensembl:ENSG00000119042|HPRD:12178|Vega:OTTHUMG00000132767	2	2q33	SATB homeobox 2		GO:0000118(histone deacetylase complex)//GO:0016363(nuclear matrix)//GO:0005667(transcription factor complex)//GO:0005654(nucleoplasm)//GO:0005634(nucleus)//GO:0005737(cytoplasm)	GO:0043565(sequence-specific DNA binding)//GO:0003682(chromatin binding)//GO:0005515(protein binding)//GO:0003677(DNA binding)	GO:0051216(cartilage development)//GO:0071310(cellular response to organic substance)//GO:0006338(chromatin remodeling)//GO:0021902(commitment of neuronal cell to specific neuron type in forebrain)//GO:0006351(transcription, DNA-templated)//GO:0002076(osteoblast development)//GO:0001764(neuron migration)//GO:0045944(positive regulation of transcription from RNA polymerase II promoter)//GO:0000122…
PIGZ	ENSG00000119227	protein_coding	-	chr3:196673213-196695931	2.73294	0.620463	4.40469	2.13904	0.0138	0.221565	up	80235	GPI-MT-IV|PIG-Z|SMP3	MIM:611671|HGNC:HGNC:30596|Ensembl:ENSG00000119227|HPRD:18076|Vega:OTTHUMG00000155522	3	3q29	phosphatidylinositol glycan anchor biosynthesis class Z	hsa00563(Glycosylphosphatidylinositol(GPI)-anchor biosynthesis)	GO:0005783(endoplasmic reticulum)//GO:0016021(integral component of membrane)//GO:0005789(endoplasmic reticulum membrane)	GO:0000026(alpha-1,2-mannosyltransferase activity)//GO:0016757(transferase activity, transferring glycosyl groups)//GO:0000030(mannosyltransferase activity)	GO:0008152(metabolic process)//GO:0006506(GPI anchor biosynthetic process)//GO:0097502(mannosylation)
C1orf198	ENSG00000119280	protein_coding	-	chr1:230972864-231005335	14.5088	8.27673	1.75296	0.809795	0.04755	0.396134	up	84886	-	HGNC:HGNC:25900|Ensembl:ENSG00000119280|HPRD:13359|Vega:OTTHUMG00000037790	1	1q42.2	chromosome 1 open reading frame 198		GO:0005737(cytoplasm)
TRIM32	ENSG00000119401	protein_coding	+	chr9:119187503-120177348	6.47051	2.56229	2.52527	1.33644	0.02	0.266635	up	22954	BBS11|HT2A|LGMD2H|TATIP	MIM:602290|HGNC:HGNC:16380|Ensembl:ENSG00000119401|HPRD:03797|Vega:OTTHUMG00000021026	9	9q33.1	tripartite motif containing 32	hsa04120(Ubiquitin mediated proteolysis)	GO:0005622(intracellular)//GO:0005634(nucleus)//GO:0005863(striated muscle myosin thick filament)//GO:0005737(cytoplasm)//GO:0005829(cytosol)	GO:0043130(ubiquitin binding)//GO:0008270(zinc ion binding)//GO:0030957(Tat protein binding)//GO:0003723(RNA binding)//GO:0004842(ubiquitin-protein transferase activity)//GO:0061630(ubiquitin protein ligase activity)//GO:0031369(translation initiation factor binding)//GO:0016874(ligase activity)//GO:0043621(protein self-association)//GO:0017022(myosin binding)//GO:0005515(protein binding)//GO:000…	GO:0045862(positive regulation of proteolysis)//GO:0050769(positive regulation of neurogenesis)//GO:0007014(actin ubiquitination)//GO:1903883(positive regulation of interleukin-17-mediated signaling pathway)//GO:0001894(tissue homeostasis)//GO:0045444(fat cell differentiation)//GO:0043123(positive regulation of I-kappaB kinase/NF-kappaB signaling)//GO:1903886(positive regulation of chemokine (C-C…
GALNT12	ENSG00000119514	protein_coding	+	chr9:101569980-101634697	14.0331	7.18542	1.95299	0.965687	0.0312	0.33022	up	79695	CRCS1|GalNAc-T12	MIM:610290|HGNC:HGNC:19877|Ensembl:ENSG00000119514|HPRD:13561|Vega:OTTHUMG00000020348	9	9q22.33	polypeptide N-acetylgalactosaminyltransferase 12	hsa00512(Mucin type O-Glycan biosynthesis)//	GO:0016021(integral component of membrane)//GO:0000139(Golgi membrane)	GO:0004653(polypeptide N-acetylgalactosaminyltransferase activity)//GO:0030246(carbohydrate binding)//GO:0046872(metal ion binding)	GO:0006493(protein O-linked glycosylation)//GO:0043687(post-translational protein modification)//GO:0016266(O-glycan processing)//GO:0044267(cellular protein metabolic process)
C19orf25	ENSG00000119559	protein_coding	-	chr19:1446299-1479555	2.72052	0.545624	4.98606	2.3179	0.005	0.130802	up	148223	-	HGNC:HGNC:26711|Ensembl:ENSG00000119559|HPRD:12703|Vega:OTTHUMG00000180092	19	19p13.3	chromosome 19 open reading frame 25			GO:0005515(protein binding)
ACYP1	ENSG00000119640	protein_coding	-	chr14:75519923-75545126	8.66699	1.6615	5.21635	2.38304	0.03975	0.371244	up	97	ACYPE	MIM:600875|HGNC:HGNC:179|Ensembl:ENSG00000119640|HPRD:02928|Vega:OTTHUMG00000171767	14	14q24.3	acylphosphatase 1, erythrocyte (common) type	hsa00620(Pyruvate metabolism)	GO:0070062(extracellular exosome)	GO:0003998(acylphosphatase activity)	GO:0008152(metabolic process)//GO:0006796(phosphate-containing compound metabolic process)
IRF2BPL	ENSG00000119669	protein_coding	-	chr14:77490887-77495034	3.96969	1.74018	2.2812	1.18979	0.04285	0.381018	up	64207	C14orf4|EAP1	MIM:611720|HGNC:HGNC:14282|Ensembl:ENSG00000119669|HPRD:10713|Vega:OTTHUMG00000171578	14	14q24.3	interferon regulatory factor 2 binding protein-like		GO:0005654(nucleoplasm)//GO:0005634(nucleus)//GO:0005615(extracellular space)	GO:0003674(molecular_function)//GO:0046872(metal ion binding)	GO:0046543(development of secondary female sexual characteristics)//GO:0045944(positive regulation of transcription from RNA polymerase II promoter)//GO:0000122(negative regulation of transcription from RNA polymerase II promoter)
GPAM	ENSG00000119927	protein_coding	-	chr10:113909623-113975135	77.6723	34.9687	2.2212	1.15134	0.0484	0.399954	up	57678	GPAT|GPAT1	MIM:602395|HGNC:HGNC:24865|Ensembl:ENSG00000119927|HPRD:03865|Vega:OTTHUMG00000019055	10	10q25.2	glycerol-3-phosphate acyltransferase, mitochondrial	hsa00561(Glycerolipid metabolism)//hsa00564(Glycerophospholipid metabolism)//	GO:0005886(plasma membrane)//GO:0005741(mitochondrial outer membrane)//GO:0005743(mitochondrial inner membrane)//GO:0016021(integral component of membrane)	GO:0004366(glycerol-3-phosphate O-acyltransferase activity)	GO:0006644(phospholipid metabolic process)//GO:0008654(phospholipid biosynthetic process)//GO:0016024(CDP-diacylglycerol biosynthetic process)//GO:0019432(triglyceride biosynthetic process)//GO:0055091(phospholipid homeostasis)//GO:0042104(positive regulation of activated T cell proliferation)//GO:0046686(response to cadmium ion)//GO:0050707(regulation of cytokine secretion)//GO:0070970(interleuk…
PPP1R3C	ENSG00000119938	protein_coding	-	chr10:93388198-93392811	14.782	8.1478	1.81423	0.859356	0.0456	0.389587	up	5507	PPP1R5	MIM:602999|HGNC:HGNC:9293|Ensembl:ENSG00000119938|HPRD:04298|Vega:OTTHUMG00000018745	10	10q23-q24	protein phosphatase 1 regulatory subunit 3C	hsa04910(Insulin signaling pathway)//	GO:0005829(cytosol)	GO:0004722(protein serine/threonine phosphatase activity)//GO:0005515(protein binding)//GO:0019903(protein phosphatase binding)//GO:0019888(protein phosphatase regulator activity)	GO:0050790(regulation of catalytic activity)//GO:0044281(small molecule metabolic process)//GO:0005978(glycogen biosynthetic process)//GO:0006006(glucose metabolic process)//GO:0005975(carbohydrate metabolic process)//GO:0006470(protein dephosphorylation)
HOXB8	ENSG00000120068	protein_coding	-	chr17:46684593-46712294	1.1343	0	inf	inf	0.01945	0.263464	up	3218	HOX2|HOX2D|Hox-2.4	MIM:142963|HGNC:HGNC:5119|Ensembl:ENSG00000120068|HPRD:00851|Vega:OTTHUMG00000159904	17	17q21.3	homeobox B8		GO:0005634(nucleus)	GO:0043565(sequence-specific DNA binding)//GO:0003700(transcription factor activity, sequence-specific DNA binding)	GO:0007625(grooming behavior)//GO:0021516(dorsal spinal cord development)//GO:0019233(sensory perception of pain)//GO:0006351(transcription, DNA-templated)//GO:0045638(negative regulation of myeloid cell differentiation)//GO:0009952(anterior/posterior pattern specification)//GO:0007275(multicellular organism development)//GO:0008344(adult locomotory behavior)//GO:0048704(embryonic skeletal system…
RCL1	ENSG00000120158	protein_coding	+	chr9:4792868-4885917	11.3846	4.7482	2.39766	1.26163	0.0342	0.34648	up	10171	RNAC|RPCL1	MIM:611405|HGNC:HGNC:17687|Ensembl:ENSG00000120158|HPRD:10189|Vega:OTTHUMG00000019474	9	9p24.1-p23	RNA terminal phosphate cyclase-like 1	hsa03008(Ribosome biogenesis in eukaryotes)	GO:0005730(nucleolus)	GO:0003824(catalytic activity)//GO:0003963(RNA-3'-phosphate cyclase activity)//GO:0004521(endoribonuclease activity)//GO:0003723(RNA binding)	GO:0000479(endonucleolytic cleavage of tricistronic rRNA transcript (SSU-rRNA, 5.8S rRNA, LSU-rRNA))//GO:0006396(RNA processing)//GO:0008150(biological_process)//GO:0042254(ribosome biogenesis)
MOB3B	ENSG00000120162	protein_coding	-	chr9:27325206-27529779	6.12506	2.17154	2.82062	1.49601	0.00525	0.133913	up	79817	C9orf35|MOB1D|MOBKL2B	HGNC:HGNC:23825|Ensembl:ENSG00000120162|HPRD:14728|Vega:OTTHUMG00000019717	9	9p21.2	MOB kinase activator 3B			GO:0046872(metal ion binding)//GO:0005515(protein binding)
PCDHB8	ENSG00000120322	protein_coding	+	chr5:140557370-140560081	1.43897	0.244389	5.88805	2.55779	0.01435	0.226094	up	56128	PCDH-BETA8|PCDH3I	MIM:606334|HGNC:HGNC:8693|Ensembl:ENSG00000120322|HPRD:07563|Vega:OTTHUMG00000129621	5	5q31	protocadherin beta 8		GO:0005886(plasma membrane)//GO:0016021(integral component of membrane)	GO:0005509(calcium ion binding)	GO:0007156(homophilic cell adhesion via plasma membrane adhesion molecules)
DUSP4	ENSG00000120875	protein_coding	-	chr8:29190580-29208185	7.3882	3.58839	2.05892	1.04189	0.0299	0.325695	up	1846	HVH2|MKP-2|MKP2|TYP	MIM:602747|HGNC:HGNC:3070|Ensembl:ENSG00000120875|HPRD:04123|Vega:OTTHUMG00000133395	8	8p12-p11	dual specificity phosphatase 4	hsa04010(MAPK signaling pathway)	GO:0005654(nucleoplasm)//GO:0005634(nucleus)	GO:0008330(protein tyrosine/threonine phosphatase activity)//GO:0017017(MAP kinase tyrosine/serine/threonine phosphatase activity)//GO:0004725(protein tyrosine phosphatase activity)	GO:0034166(toll-like receptor 10 signaling pathway)//GO:0034138(toll-like receptor 3 signaling pathway)//GO:0034146(toll-like receptor 5 signaling pathway)//GO:0034162(toll-like receptor 9 signaling pathway)//GO:0045087(innate immune response)//GO:0002755(MyD88-dependent toll-like receptor signaling pathway)//GO:0000165(MAPK cascade)//GO:0006470(protein dephosphorylation)//GO:0001706(endoderm for…
UBIAD1	ENSG00000120942	protein_coding	+	chr1:11333262-11356106	4.70468	2.023	2.3256	1.2176	0.0296	0.324613	up	29914	SCCD|TERE1	MIM:611632|HGNC:HGNC:30791|Ensembl:ENSG00000120942|HPRD:15487|Vega:OTTHUMG00000002075	1	1p36.22	UbiA prenyltransferase domain containing 1		GO:0016021(integral component of membrane)//GO:0016020(membrane)//GO:0005789(endoplasmic reticulum membrane)//GO:0030173(integral component of Golgi membrane)//GO:0005783(endoplasmic reticulum)//GO:0031966(mitochondrial membrane)//GO:0005634(nucleus)//GO:0005737(cytoplasm)	GO:0005515(protein binding)//GO:0004659(prenyltransferase activity)//GO:0016209(antioxidant activity)	GO:0008152(metabolic process)//GO:0044281(small molecule metabolic process)//GO:0006775(fat-soluble vitamin metabolic process)//GO:0009234(menaquinone biosynthetic process)//GO:0042371(vitamin K biosynthetic process)//GO:0098869(cellular oxidant detoxification)//GO:0006744(ubiquinone biosynthetic process)//GO:0006766(vitamin metabolic process)//GO:0042373(vitamin K metabolic process)
FAM117A	ENSG00000121104	protein_coding	-	chr17:47778304-47906458	5.83457	0.948828	6.14925	2.62041	0.0243	0.2961	up	81558	-	HGNC:HGNC:24179|Ensembl:ENSG00000121104|HPRD:17432|Vega:OTTHUMG00000161696	17	17q21.33	family with sequence similarity 117 member A
KIAA0922	ENSG00000121210	protein_coding	+	chr4:154387497-154557863	20.2447	4.88772	4.14195	2.05031	5e-05	0.00584669	up	23240	TMEM131L	MIM:616243|HGNC:HGNC:29146|Ensembl:ENSG00000121210|HPRD:13823|Vega:OTTHUMG00000153244	4	4q31.3	KIAA0922		GO:0005783(endoplasmic reticulum)//GO:0005886(plasma membrane)//GO:0016021(integral component of membrane)//GO:0005737(cytoplasm)		GO:0033088(negative regulation of immature T cell proliferation in thymus)//GO:0090090(negative regulation of canonical Wnt signaling pathway)//GO:0016055(Wnt signaling pathway)
A1BG	ENSG00000121410	protein_coding	-	chr19:58856543-58877958	1.56207	0	inf	inf	0.00385	0.111708	up	1	A1B|ABG|GAB|HYST2477	MIM:138670|HGNC:HGNC:5|Ensembl:ENSG00000121410|HPRD:00726|Vega:OTTHUMG00000183507	19	19q13.4	alpha-1-B glycoprotein		GO:0072562(blood microparticle)//GO:0070062(extracellular exosome)//GO:0005576(extracellular region)//GO:0005615(extracellular space)	GO:0003674(molecular_function)	GO:0008150(biological_process)
POPDC2	ENSG00000121577	protein_coding	-	chr3:119355303-119396301	1.52378	0.183365	8.31012	3.05487	0.0018	0.0730958	up	64091	POP2	MIM:605823|HGNC:HGNC:17648|Ensembl:ENSG00000121577|HPRD:16160|Vega:OTTHUMG00000159438	3	3q13.33	popeye domain containing 2		GO:0016021(integral component of membrane)//GO:0042383(sarcolemma)	GO:0003674(molecular_function)//GO:0030552(cAMP binding)	GO:0060931(sinoatrial node cell development)//GO:0002027(regulation of heart rate)//GO:0042391(regulation of membrane potential)//GO:0008150(biological_process)
PEX16	ENSG00000121680	protein_coding	-	chr11:45931219-45940363	2.08447	0.548671	3.79913	1.92567	0.0286	0.319422	up	9409	PBD8A|PBD8B	MIM:603360|HGNC:HGNC:8857|Ensembl:ENSG00000121680|HPRD:04526|Vega:OTTHUMG00000167005	11	11p11.2	peroxisomal biogenesis factor 16	hsa04146(Peroxisome)	GO:0005777(peroxisome)//GO:0016020(membrane)//GO:0005789(endoplasmic reticulum membrane)//GO:0005779(integral component of peroxisomal membrane)//GO:0005783(endoplasmic reticulum)//GO:0005778(peroxisomal membrane)	GO:0005515(protein binding)//GO:0008022(protein C-terminus binding)	GO:0007031(peroxisome organization)//GO:0016557(peroxisome membrane biogenesis)//GO:0045046(protein import into peroxisome membrane)//GO:0070972(protein localization to endoplasmic reticulum)//GO:0022615(protein to membrane docking)//GO:0032581(ER-dependent peroxisome organization)//GO:0016558(protein import into peroxisome matrix)//GO:0006625(protein targeting to peroxisome)
PILRB	ENSG00000121716	protein_coding	+	chr7:99905324-99997719	23.2876	8.65077	2.69197	1.42866	0.0491	0.403133	up	29990	FDFACT1|FDFACT2	MIM:605342|HGNC:HGNC:18297	7	7q22.1	paired immunoglobin-like type 2 receptor beta		GO:0005887(integral component of plasma membrane)	GO:0005515(protein binding)//GO:0042288(MHC class I protein binding)	GO:0007171(activation of transmembrane receptor protein tyrosine kinase activity)//GO:0007169(transmembrane receptor protein tyrosine kinase signaling pathway)
CCR2	ENSG00000121807	protein_coding	+	chr3:46395224-46402419	7.1104	0.80108	8.876	3.14991	0.00055	0.0336784	up	729230	CC-CKR-2|CCR-2|CCR2A|CCR2B|CD192|CKR2|CKR2A|CKR2B|CMKBR2|MCP-1-R	MIM:601267|HGNC:HGNC:1603|Ensembl:ENSG00000121807|Vega:OTTHUMG00000156466	3	3p21.31	chemokine (C-C motif) receptor 2	hsa04060(Cytokine-cytokine receptor interaction)//hsa04062(Chemokine signaling pathway)	GO:0005768(endosome)//GO:0016021(integral component of membrane)//GO:0005887(integral component of plasma membrane)//GO:0043204(perikaryon)//GO:0009986(cell surface)//GO:0030425(dendrite)//GO:0048471(perinuclear region of cytoplasm)//GO:0005886(plasma membrane)//GO:0005829(cytosol)//GO:0005737(cytoplasm)//GO:0043025(neuronal cell body)	GO:0031727(CCR2 chemokine receptor binding)//GO:0042803(protein homodimerization activity)//GO:0016493(C-C chemokine receptor activity)//GO:0019901(protein kinase binding)//GO:0004950(chemokine receptor activity)//GO:0071791(chemokine (C-C motif) ligand 5 binding)	GO:0046641(positive regulation of alpha-beta T cell proliferation)//GO:0006874(cellular calcium ion homeostasis)//GO:0030517(negative regulation of axon extension)//GO:0010628(positive regulation of gene expression)//GO:0050718(positive regulation of interleukin-1 beta secretion)//GO:0007204(positive regulation of cytosolic calcium ion concentration)//GO:0009611(response to wounding)//GO:0032755(…
TMEM156	ENSG00000121895	protein_coding	-	chr4:38968364-39034542	2.47513	0.279154	8.86653	3.14837	0.01605	0.240206	up	80008	-	HGNC:HGNC:26260|Ensembl:ENSG00000121895|HPRD:08022|Vega:OTTHUMG00000128582	4	4p14	transmembrane protein 156		GO:0016021(integral component of membrane)
CPXM2	ENSG00000121898	protein_coding	-	chr10:125465722-125699783	8.25412	2.42244	3.40735	1.76865	0.0007	0.0383833	up	119587	CPX2|UNQ676	HGNC:HGNC:26977|Ensembl:ENSG00000121898|HPRD:08517|Vega:OTTHUMG00000019206	10	10q26.13	carboxypeptidase X (M14 family), member 2		GO:0031012(extracellular matrix)//GO:0005615(extracellular space)	GO:0008270(zinc ion binding)//GO:0004181(metallocarboxypeptidase activity)//GO:0004185(serine-type carboxypeptidase activity)	GO:0006508(proteolysis)//GO:0006518(peptide metabolic process)//GO:0016485(protein processing)
SASH3	ENSG00000122122	protein_coding	+	chrX:128913954-128930939	10.1055	3.61316	2.79686	1.48381	0.0081	0.167622	up	54440	753P9|CXorf9|HACS2|SH3D6C|SLY	MIM:300441|HGNC:HGNC:15975|Ensembl:ENSG00000122122|HPRD:02342|Vega:OTTHUMG00000022372	X	Xq26	SAM and SH3 domain containing 3		GO:0005634(nucleus)//GO:0005737(cytoplasm)		GO:0030890(positive regulation of B cell proliferation)//GO:0042102(positive regulation of T cell proliferation)//GO:0032729(positive regulation of interferon-gamma production)//GO:0002726(positive regulation of T cell cytokine production)//GO:0032753(positive regulation of interleukin-4 production)//GO:0002639(positive regulation of immunoglobulin production)//GO:0043372(positive regulation of C…
FMOD	ENSG00000122176	protein_coding	-	chr1:203309755-203320617	24.1709	6.35427	3.80388	1.92747	0.0003	0.0221418	up	2331	FM|SLRR2E	MIM:600245|HGNC:HGNC:3774|Ensembl:ENSG00000122176|HPRD:02591|Vega:OTTHUMG00000035910	1	1q32	fibromodulin		GO:0005576(extracellular region)//GO:0005796(Golgi lumen)//GO:0043202(lysosomal lumen)//GO:0005578(proteinaceous extracellular matrix)//GO:0031012(extracellular matrix)//GO:0005615(extracellular space)	GO:0048495(Roundabout binding)//GO:0008201(heparin binding)	GO:0007409(axonogenesis)//GO:0044281(small molecule metabolic process)//GO:0050770(regulation of axonogenesis)//GO:0048846(axon extension involved in axon guidance)//GO:0030198(extracellular matrix organization)//GO:0042339(keratan sulfate metabolic process)//GO:0018146(keratan sulfate biosynthetic process)//GO:0005975(carbohydrate metabolic process)//GO:0042340(keratan sulfate catabolic process)…
CD244	ENSG00000122223	protein_coding	-	chr1:160799949-160832692	3.25632	0.320147	10.1714	3.34644	0.00655	0.149932	up	51744	2B4|NAIL|NKR2B4|Nmrk|SLAMF4	MIM:605554|HGNC:HGNC:18171|Ensembl:ENSG00000122223|HPRD:16121|Vega:OTTHUMG00000028606	1	1q23.3	CD244 molecule	hsa04650(Natural killer cell mediated cytotoxicity)	GO:0005886(plasma membrane)//GO:0009897(external side of plasma membrane)//GO:0016021(integral component of membrane)	GO:0004872(receptor activity)//GO:0005515(protein binding)//GO:0042288(MHC class I protein binding)	GO:1902715(positive regulation of interferon-gamma secretion)//GO:0060732(positive regulation of inositol phosphate biosynthetic process)//GO:0045087(innate immune response)//GO:0007596(blood coagulation)//GO:0071663(positive regulation of granzyme B production)//GO:0002323(natural killer cell activation involved in immune response)//GO:2000484(positive regulation of interleukin-8 secretion)//GO:…
ZNF205	ENSG00000122386	protein_coding	+	chr16:3160460-3192806	1.96095	0.0786865	24.9212	4.6393	0.01325	0.217778	up	7755	RhitH|ZNF210|Zfp13	MIM:603436|HGNC:HGNC:12996|Ensembl:ENSG00000122386|HPRD:04580|Vega:OTTHUMG00000148676	16	16p13.3	zinc finger protein 205		GO:0005622(intracellular)//GO:0005634(nucleus)//GO:0005739(mitochondrion)	GO:0003676(nucleic acid binding)//GO:0008270(zinc ion binding)//GO:0003700(transcription factor activity, sequence-specific DNA binding)//GO:0043565(sequence-specific DNA binding)//GO:0046872(metal ion binding)//GO:0005515(protein binding)	GO:0010729(positive regulation of hydrogen peroxide biosynthetic process)//GO:0006351(transcription, DNA-templated)//GO:0006355(regulation of transcription, DNA-templated)//GO:0000122(negative regulation of transcription from RNA polymerase II promoter)//GO:1901030(positive regulation of mitochondrial outer membrane permeabilization involved in apoptotic signaling pathway)
TRMT13	ENSG00000122435	protein_coding	+	chr1:100598705-100643771	20.2023	10.3552	1.95093	0.96416	0.0479	0.397685	up	54482	CCDC76	HGNC:HGNC:25502|Ensembl:ENSG00000122435|HPRD:07659|Vega:OTTHUMG00000010841	1	1p21.2	tRNA methyltransferase 13 homolog (S. cerevisiae)			GO:0008175(tRNA methyltransferase activity)//GO:0046872(metal ion binding)//GO:0008168(methyltransferase activity)	GO:0030488(tRNA methylation)//GO:0010467(gene expression)//GO:0006400(tRNA modification)//GO:0032259(methylation)//GO:0008033(tRNA processing)
ZMIZ2	ENSG00000122515	protein_coding	+	chr7:44788179-44809477	19.9377	7.47886	2.66588	1.41461	0.0039	0.112821	up	83637	NET27|TRAFIP20|ZIMP7|hZIMP7	MIM:611196|HGNC:HGNC:22229|Ensembl:ENSG00000122515|HPRD:13225|Vega:OTTHUMG00000155817	7	7p13	zinc finger MIZ-type containing 2		GO:0005654(nucleoplasm)//GO:0005739(mitochondrion)//GO:0043596(nuclear replication fork)//GO:0005634(nucleus)	GO:0030374(ligand-dependent nuclear receptor transcription coactivator activity)//GO:0008270(zinc ion binding)//GO:0005515(protein binding)	GO:0006351(transcription, DNA-templated)//GO:0045944(positive regulation of transcription from RNA polymerase II promoter)
POLM	ENSG00000122678	protein_coding	-	chr7:44111845-44122139	6.91984	1.39409	4.96371	2.31142	0.001	0.0505495	up	27434	Pol Mu|Tdt-N	MIM:606344|HGNC:HGNC:9185|Ensembl:ENSG00000122678|HPRD:16208|Vega:OTTHUMG00000155353	7	7p13	polymerase (DNA directed), mu	hsa03450(Non-homologous end-joining)	GO:0005654(nucleoplasm)//GO:0005634(nucleus)	GO:0003887(DNA-directed DNA polymerase activity)//GO:0046872(metal ion binding)//GO:0005515(protein binding)//GO:0034061(DNA polymerase activity)//GO:0003677(DNA binding)	GO:0006310(DNA recombination)//GO:0016446(somatic hypermutation of immunoglobulin genes)//GO:0006303(double-strand break repair via nonhomologous end joining)//GO:0006302(double-strand break repair)//GO:0071897(DNA biosynthetic process)//GO:0030183(B cell differentiation)//GO:0006281(DNA repair)
CIT	ENSG00000122966	protein_coding	-	chr12:120123594-120315095	22.1704	7.45879	2.97238	1.57162	0.0405	0.373183	up	11113	CRIK|STK21	MIM:605629|HGNC:HGNC:1985|Ensembl:ENSG00000122966|HPRD:09289|Vega:OTTHUMG00000134325	12	12q24	citron rho-interacting serine/threonine kinase		GO:0016020(membrane)//GO:0015629(actin cytoskeleton)//GO:0001726(ruffle)//GO:0005829(cytosol)//GO:0005622(intracellular)//GO:0005773(vacuole)	GO:0004674(protein serine/threonine kinase activity)//GO:0017124(SH3 domain binding)//GO:0004672(protein kinase activity)//GO:0030165(PDZ domain binding)//GO:0005524(ATP binding)//GO:0097110(scaffold protein binding)//GO:0046872(metal ion binding)//GO:0005515(protein binding)	GO:0007283(spermatogenesis)//GO:0007067(mitotic nuclear division)//GO:0007091(metaphase/anaphase transition of mitotic cell cycle)//GO:0032467(positive regulation of cytokinesis)//GO:0006468(protein phosphorylation)//GO:0048699(generation of neurons)//GO:0007264(small GTPase mediated signal transduction)//GO:0000910(cytokinesis)//GO:0050774(negative regulation of dendrite morphogenesis)//GO:00000…
CDKN2C	ENSG00000123080	protein_coding	+	chr1:51426416-51440305	24.6841	11.996	2.0577	1.04103	0.03785	0.363536	up	1031	INK4C|p18|p18-INK4C	MIM:603369|HGNC:HGNC:1789|Ensembl:ENSG00000123080|HPRD:04534|Vega:OTTHUMG00000008046	1	1p32	cyclin-dependent kinase inhibitor 2C	hsa04110(Cell cycle)//hsa05166(HTLV-I infection)//hsa05202(Transcriptional misregulation in cancer)	GO:0005634(nucleus)//GO:0005737(cytoplasm)//GO:0005829(cytosol)	GO:0019901(protein kinase binding)//GO:0005515(protein binding)//GO:0004861(cyclin-dependent protein serine/threonine kinase inhibitor activity)	GO:0007050(cell cycle arrest)//GO:0042326(negative regulation of phosphorylation)//GO:0048709(oligodendrocyte differentiation)//GO:0000082(G1/S transition of mitotic cell cycle)//GO:0000278(mitotic cell cycle)//GO:0071901(negative regulation of protein serine/threonine kinase activity)//GO:0000079(regulation of cyclin-dependent protein serine/threonine kinase activity)//GO:0008285(negative regula…
ATP7B	ENSG00000123191	protein_coding	-	chr13:52506808-52585630	3.87449	0.213849	18.1179	4.17934	0.0007	0.0383833	up	540	PWD|WC1|WD|WND	MIM:606882|HGNC:HGNC:870|Ensembl:ENSG00000123191|HPRD:06050|Vega:OTTHUMG00000017406	13	13q14.3	ATPase copper transporting beta		GO:0005923(bicellular tight junction)//GO:0016021(integral component of membrane)//GO:0005887(integral component of plasma membrane)//GO:0005802(trans-Golgi network)//GO:0016020(membrane)//GO:0048471(perinuclear region of cytoplasm)//GO:0005770(late endosome)//GO:0016323(basolateral plasma membrane)//GO:0005739(mitochondrion)//GO:0000139(Golgi membrane)//GO:0032588(trans-Golgi network membrane)//…	GO:0008270(zinc ion binding)//GO:0019829(cation-transporting ATPase activity)//GO:0005507(copper ion binding)//GO:0004008(copper-exporting ATPase activity)//GO:0043682(copper-transporting ATPase activity)//GO:0000166(nucleotide binding)//GO:0005515(protein binding)//GO:0005524(ATP binding)//GO:0016787(hydrolase activity)	GO:0030001(metal ion transport)//GO:0051208(sequestering of calcium ion)//GO:0008152(metabolic process)//GO:0015680(intracellular copper ion transport)//GO:0046688(response to copper ion)//GO:0006878(cellular copper ion homeostasis)//GO:0051591(response to cAMP)//GO:0055085(transmembrane transport)//GO:0007595(lactation)//GO:0006882(cellular zinc ion homeostasis)//GO:0010043(response to zinc ion)…
ITIH5	ENSG00000123243	protein_coding	-	chr10:7601231-7708961	41.944	21.1599	1.98224	0.987129	0.0474	0.395564	up	80760	ITI-HC5|PP14776	MIM:609783|HGNC:HGNC:21449|Ensembl:ENSG00000123243|HPRD:07865|HPRD:13747|Vega:OTTHUMG00000017635	10	10p14	inter-alpha-trypsin inhibitor heavy chain family member 5		GO:0005576(extracellular region)	GO:0004867(serine-type endopeptidase inhibitor activity)	GO:0030212(hyaluronan metabolic process)//GO:0010951(negative regulation of endopeptidase activity)
IKZF4	ENSG00000123411	protein_coding	+	chr12:56401442-56435590	6.10831	1.50262	4.0651	2.02329	0.0397	0.371244	up	64375	EOS|ZNFN1A4	MIM:606239|HGNC:HGNC:13179|Ensembl:ENSG00000123411|HPRD:05874|Vega:OTTHUMG00000170132	12	12q13	IKAROS family zinc finger 4		GO:0005654(nucleoplasm)//GO:0005634(nucleus)//GO:0005813(centrosome)	GO:0003676(nucleic acid binding)//GO:0046982(protein heterodimerization activity)//GO:0042803(protein homodimerization activity)//GO:0043565(sequence-specific DNA binding)//GO:0003700(transcription factor activity, sequence-specific DNA binding)//GO:0044212(transcription regulatory region DNA binding)//GO:0043425(bHLH transcription factor binding)//GO:0046872(metal ion binding)	GO:0045892(negative regulation of transcription, DNA-templated)//GO:0006351(transcription, DNA-templated)//GO:0045944(positive regulation of transcription from RNA polymerase II promoter)
COL10A1	ENSG00000123500	protein_coding	-	chr6:116422011-116570660	3.52312	0.0157456	223.753	7.80576	0.01655	0.243908	up	1300	-	MIM:120110|HGNC:HGNC:2185|Ensembl:ENSG00000123500|HPRD:00357	6	6q21-q22	collagen type X alpha 1	hsa04974(Protein digestion and absorption)	GO:0005578(proteinaceous extracellular matrix)//GO:0005788(endoplasmic reticulum lumen)//GO:0005581(collagen trimer)//GO:0005576(extracellular region)//GO:0005938(cell cortex)	GO:0046872(metal ion binding)//GO:0005515(protein binding)	GO:0051216(cartilage development)//GO:0022617(extracellular matrix disassembly)//GO:0030198(extracellular matrix organization)//GO:0001501(skeletal system development)//GO:0001958(endochondral ossification)//GO:0030574(collagen catabolic process)
PLP1	ENSG00000123560	protein_coding	+	chrX:103028646-103087212	2.42554	0.173703	13.9637	3.80361	5e-05	0.00584669	up	5354	GPM6C|HLD1|MMPL|PLP|PLP/DM20|PMD|SPG2	MIM:300401|HGNC:HGNC:9086|Ensembl:ENSG00000123560|HPRD:02321|Vega:OTTHUMG00000022111	X	Xq22	proteolipid protein 1		GO:0016021(integral component of membrane)//GO:0043209(myelin sheath)//GO:0005886(plasma membrane)	GO:0005198(structural molecule activity)//GO:0005515(protein binding)//GO:0019911(structural constituent of myelin sheath)	GO:0014002(astrocyte development)//GO:0010628(positive regulation of gene expression)//GO:0061564(axon development)//GO:0007268(synaptic transmission)//GO:0006954(inflammatory response)//GO:0042759(long-chain fatty acid biosynthetic process)//GO:0008366(axon ensheathment)//GO:0022010(central nervous system myelination)//GO:0007229(integrin-mediated signaling pathway)//GO:0021762(substantia nigra …
ACVR1C	ENSG00000123612	protein_coding	-	chr2:158383278-158485517	10.3799	2.33476	4.44579	2.15244	5e-05	0.00584669	up	130399	ACVRLK7|ALK7	MIM:608981|HGNC:HGNC:18123|Ensembl:ENSG00000123612|HPRD:10608|Vega:OTTHUMG00000131964	2	2q24.1	activin A receptor type IC	hsa04350(TGF-beta signaling pathway)//hsa04550(Signaling pathways regulating pluripotency of stem cells)	GO:0048179(activin receptor complex)//GO:0005886(plasma membrane)	GO:0016361(activin receptor activity, type I)//GO:0005524(ATP binding)//GO:0038100(nodal binding)//GO:0019838(growth factor binding)//GO:0004702(receptor signaling protein serine/threonine kinase activity)//GO:0046872(metal ion binding)	GO:1901164(negative regulation of trophoblast cell migration)//GO:0038092(nodal signaling pathway)//GO:0019915(lipid storage)//GO:0030262(apoptotic nuclear changes)//GO:0009749(response to glucose)//GO:0006468(protein phosphorylation)//GO:0030154(cell differentiation)//GO:0002021(response to dietary excess)//GO:0043280(positive regulation of cysteine-type endopeptidase activity involved in apopto…
G0S2	ENSG00000123689	protein_coding	+	chr1:209834708-209908295	158.418	61.9382	2.55769	1.35484	0.03675	0.35811	up	50486	-	MIM:614447|HGNC:HGNC:30229|Ensembl:ENSG00000123689|HPRD:09968|Vega:OTTHUMG00000036479	1	1q32.2	G0/G1 switch 2		GO:0005811(lipid particle)//GO:0005739(mitochondrion)	GO:0003674(molecular_function)//GO:0005515(protein binding)	GO:0044255(cellular lipid metabolic process)//GO:2001238(positive regulation of extrinsic apoptotic signaling pathway)//GO:0044281(small molecule metabolic process)//GO:0097191(extrinsic apoptotic signaling pathway)
ADCK4	ENSG00000123815	protein_coding	-	chr19:41197433-41271294	5.06979	1.16896	4.33701	2.1167	0.0089	0.176825	up	79934	NPHS9	MIM:615567|HGNC:HGNC:19041|Ensembl:ENSG00000123815|HPRD:10632|Vega:OTTHUMG00000182620	19	19q13.2	aarF domain containing kinase 4		GO:0031966(mitochondrial membrane)//GO:0005886(plasma membrane)//GO:0016021(integral component of membrane)//GO:0005829(cytosol)	GO:0004674(protein serine/threonine kinase activity)	GO:0006468(protein phosphorylation)
MXD4	ENSG00000123933	protein_coding	-	chr4:2249158-2264021	8.83713	2.92454	3.02172	1.59537	0.00595	0.143963	up	10608	MAD4|MST149|MSTP149|bHLHc12	HGNC:HGNC:13906|Ensembl:ENSG00000123933|HPRD:10103|Vega:OTTHUMG00000090243	4	4p16.3	MAX dimerization protein 4		GO:0005634(nucleus)	GO:0003714(transcription corepressor activity)//GO:0046983(protein dimerization activity)//GO:0005515(protein binding)//GO:0003677(DNA binding)	GO:0006351(transcription, DNA-templated)//GO:0008285(negative regulation of cell proliferation)//GO:0000122(negative regulation of transcription from RNA polymerase II promoter)
ZNF831	ENSG00000124203	protein_coding	+	chr20:57766074-57834168	1.59634	0.281034	5.68023	2.50595	0.0217	0.277849	up	128611	C20orf174|dJ492J12.1	HGNC:HGNC:16167|Ensembl:ENSG00000124203|Vega:OTTHUMG00000032864	20	20q13.32	zinc finger protein 831		GO:0005634(nucleus)	GO:0043565(sequence-specific DNA binding)//GO:0046872(metal ion binding)//GO:0044212(transcription regulatory region DNA binding)//GO:0003700(transcription factor activity, sequence-specific DNA binding)	GO:0006366(transcription from RNA polymerase II promoter)//GO:0007275(multicellular organism development)//GO:0006355(regulation of transcription, DNA-templated)//GO:0007165(signal transduction)
PTGIS	ENSG00000124212	protein_coding	-	chr20:48120410-48184683	8.67023	2.82188	3.07251	1.61942	0.0013	0.059939	up	5740	CYP8|CYP8A1|PGIS|PTGI	MIM:601699|HGNC:HGNC:9603|Ensembl:ENSG00000124212|HPRD:09046|Vega:OTTHUMG00000033077	20	20q13.13	prostaglandin I2 (prostacyclin) synthase	hsa00590(Arachidonic acid metabolism)//	GO:0016021(integral component of membrane)//GO:0005901(caveola)//GO:0005789(endoplasmic reticulum membrane)//GO:0005783(endoplasmic reticulum)//GO:0005634(nucleus)//GO:0005615(extracellular space)	GO:0005506(iron ion binding)//GO:0016705(oxidoreductase activity, acting on paired donors, with incorporation or reduction of molecular oxygen)//GO:0020037(heme binding)//GO:0004497(monooxygenase activity)//GO:0008116(prostaglandin-I synthase activity)//GO:0005515(protein binding)	GO:0045019(negative regulation of nitric oxide biosynthetic process)//GO:0006769(nicotinamide metabolic process)//GO:0006690(icosanoid metabolic process)//GO:0035360(positive regulation of peroxisome proliferator activated receptor signaling pathway)//GO:0001516(prostaglandin biosynthetic process)//GO:0046697(decidualization)//GO:0097190(apoptotic signaling pathway)//GO:0006767(water-soluble vita…
PCK1	ENSG00000124253	protein_coding	+	chr20:56136135-56141513	46.1709	13.018	3.54668	1.82647	0.0132	0.217324	up	5105	PEPCK-C|PEPCK1|PEPCKC	MIM:614168|HGNC:HGNC:8724|HPRD:02028	20	20q13.31	phosphoenolpyruvate carboxykinase 1	hsa00010(Glycolysis / Gluconeogenesis)//hsa00020(Citrate cycle (TCA cycle))//hsa00620(Pyruvate metabolism)//	GO:0070062(extracellular exosome)//GO:0005737(cytoplasm)//GO:0005829(cytosol)	GO:0019003(GDP binding)//GO:0000287(magnesium ion binding)//GO:0004613(phosphoenolpyruvate carboxykinase (GTP) activity)//GO:0030145(manganese ion binding)//GO:0005525(GTP binding)//GO:0031406(carboxylic acid binding)	GO:0006107(oxaloacetate metabolic process)//GO:0017144(drug metabolic process)//GO:0044281(small molecule metabolic process)//GO:0006475(internal protein amino acid acetylation)//GO:0006094(gluconeogenesis)//GO:0046327(glycerol biosynthetic process from pyruvate)//GO:0042593(glucose homeostasis)//GO:0006006(glucose metabolic process)//GO:0014823(response to activity)//GO:0005975(carbohydrate meta…
XG	ENSG00000124343	protein_coding	+	chrX:2670090-2734539	16.8962	6.32237	2.67244	1.41816	0.004	0.115199	up	7499	PBDX	MIM:300879|HGNC:HGNC:12806|Ensembl:ENSG00000124343|HPRD:02443|Vega:OTTHUMG00000021075	X	Xp22.33	Xg blood group		GO:0016021(integral component of membrane)//GO:0005887(integral component of plasma membrane)	GO:0003674(molecular_function)	GO:0008150(biological_process)
ATP8A1	ENSG00000124406	protein_coding	-	chr4:42410389-42659122	17.3977	6.95314	2.50214	1.32316	0.0123	0.207253	up	10396	ATPASEII|ATPIA|ATPP2	MIM:609542|HGNC:HGNC:13531|Ensembl:ENSG00000124406|HPRD:16527|Vega:OTTHUMG00000099403	4	4p13	ATPase phospholipid transporting 8A1		GO:0016021(integral component of membrane)//GO:0070062(extracellular exosome)//GO:0005802(trans-Golgi network)//GO:0016020(membrane)//GO:0005794(Golgi apparatus)//GO:0005886(plasma membrane)//GO:0043231(intracellular membrane-bounded organelle)//GO:0042584(chromaffin granule membrane)//GO:0000139(Golgi membrane)//GO:0005783(endoplasmic reticulum)	GO:0005524(ATP binding)//GO:0005515(protein binding)//GO:0019829(cation-transporting ATPase activity)//GO:0000287(magnesium ion binding)//GO:0004012(phospholipid-translocating ATPase activity)	GO:0008152(metabolic process)//GO:0045332(phospholipid translocation)//GO:0007612(learning)//GO:0061092(positive regulation of phospholipid translocation)//GO:0048194(Golgi vesicle budding)//GO:0055085(transmembrane transport)//GO:0030335(positive regulation of cell migration)//GO:0098655(cation transmembrane transport)//GO:0034220(ion transmembrane transport)
NRN1	ENSG00000124785	protein_coding	-	chr6:5998231-6007200	16.3897	6.17214	2.65542	1.40894	0.00595	0.143963	up	51299	NRN|dJ380B8.2	MIM:607409|HGNC:HGNC:17972|Ensembl:ENSG00000124785|HPRD:07592|Vega:OTTHUMG00000014184	6	6p25.1	neuritin 1		GO:0045202(synapse)//GO:0031225(anchored component of membrane)//GO:0005886(plasma membrane)//GO:0032281(AMPA glutamate receptor complex)//GO:0030054(cell junction)		GO:0007399(nervous system development)
TEKT3	ENSG00000125409	protein_coding	-	chr17:15207127-15244958	4.45104	0.239922	18.552	4.2135	0.0433	0.382565	up	64518	-	MIM:612683|HGNC:HGNC:14293|Ensembl:ENSG00000125409|HPRD:18173|Vega:OTTHUMG00000058965	17	17p12	tektin 3		GO:0070062(extracellular exosome)//GO:0005634(nucleus)//GO:0005874(microtubule)//GO:0036126(sperm flagellum)//GO:0002080(acrosomal membrane)	GO:0003674(molecular_function)//GO:0005515(protein binding)	GO:0060271(cilium morphogenesis)//GO:0030317(sperm motility)//GO:0080154(regulation of fertilization)
SLC25A19	ENSG00000125454	protein_coding	-	chr17:73267379-73285591	9.25137	2.40043	3.85406	1.94638	0.03105	0.33022	up	60386	DNC|MCPHA|MUP1|THMD3|THMD4|TPC	MIM:606521|HGNC:HGNC:14409|Ensembl:ENSG00000125454|HPRD:08405|Vega:OTTHUMG00000179607	17	17q25.3	solute carrier family 25 (mitochondrial thiamine pyrophosphate carrier), member 19		GO:0016021(integral component of membrane)//GO:0005634(nucleus)//GO:0005743(mitochondrial inner membrane)	GO:0003735(structural constituent of ribosome)//GO:0030233(deoxynucleotide transmembrane transporter activity)	GO:0098792(xenophagy)//GO:0006412(translation)//GO:0030302(deoxynucleotide transport)//GO:0055085(transmembrane transport)//GO:0006810(transport)//GO:0002230(positive regulation of defense response to virus by host)
SLC25A23	ENSG00000125648	protein_coding	-	chr19:6436089-6482568	3.38139	0.664281	5.0903	2.34775	0.0037	0.109483	up	79085	APC2|MCSC2|SCaMC-3	MIM:608746|HGNC:HGNC:19375|Ensembl:ENSG00000125648|HPRD:16381|Vega:OTTHUMG00000180852	19	19p13.3	solute carrier family 25 member 23		GO:0016021(integral component of membrane)//GO:0005743(mitochondrial inner membrane)	GO:0003735(structural constituent of ribosome)//GO:0005515(protein binding)//GO:0005509(calcium ion binding)	GO:0043457(regulation of cellular respiration)//GO:0051282(regulation of sequestering of calcium ion)//GO:0006412(translation)//GO:0002082(regulation of oxidative phosphorylation)//GO:0055085(transmembrane transport)//GO:0051503(adenine nucleotide transport)//GO:0097274(urea homeostasis)//GO:0071277(cellular response to calcium ion)
C3	ENSG00000125730	protein_coding	-	chr19:6677714-6737614	86.6399	31.5744	2.744	1.45628	0.0048	0.127459	up	718	AHUS5|ARMD9|ASP|C3a|C3b|CPAMD1|HEL-S-62p	MIM:120700|HGNC:HGNC:1318|Ensembl:ENSG00000125730|HPRD:00400|Vega:OTTHUMG00000150335	19	19p13.3-p13.2	complement component 3	hsa04145(Phagosome)//hsa04610(Complement and coagulation cascades)//hsa05133(Pertussis)//hsa05134(Legionellosis)//hsa05140(Leishmaniasis)//hsa05142(Chagas disease (American trypanosomiasis))//hsa05150(Staphylococcus aureus infection)//hsa05152(Tuberculosis)//hsa05168(Herpes simplex infection)//hsa05203(Viral carcinogenesis)//hsa05322(Systemic lupus erythematosus)	GO:0072562(blood microparticle)//GO:0005886(plasma membrane)//GO:0070062(extracellular exosome)//GO:0005576(extracellular region)//GO:0005615(extracellular space)	GO:0031715(C5L2 anaphylatoxin chemotactic receptor binding)//GO:0005102(receptor binding)//GO:0004866(endopeptidase inhibitor activity)//GO:0008289(lipid binding)//GO:0048037(cofactor binding)//GO:0005515(protein binding)	GO:0032026(response to magnesium ion)//GO:0006958(complement activation, classical pathway)//GO:0010866(regulation of triglyceride biosynthetic process)//GO:0048639(positive regulation of developmental growth)//GO:0006955(immune response)//GO:0051384(response to glucocorticoid)//GO:0001970(positive regulation of activation of membrane attack complex)//GO:0045766(positive regulation of angiogenesi…
EML2	ENSG00000125746	protein_coding	-	chr19:46110251-46148887	5.17691	2.38981	2.16624	1.11519	0.03945	0.37083	up	24139	ELP70|EMAP-2|EMAP2	HGNC:HGNC:18035|Ensembl:ENSG00000125746|HPRD:16860|Vega:OTTHUMG00000182127	19	19q13.32	echinoderm microtubule associated protein like 2		GO:0005875(microtubule associated complex)//GO:0016021(integral component of membrane)//GO:0005874(microtubule)//GO:0005737(cytoplasm)//GO:0072686(mitotic spindle)	GO:0005102(receptor binding)//GO:0008017(microtubule binding)//GO:0005515(protein binding)//GO:0015631(tubulin binding)//GO:0008022(protein C-terminus binding)	GO:0007605(sensory perception of sound)//GO:0007601(visual perception)//GO:0031115(negative regulation of microtubule polymerization)//GO:0010968(regulation of microtubule nucleation)
TBC1D20	ENSG00000125875	protein_coding	-	chr20:416123-443197	13.8693	7.50718	1.84747	0.885551	0.0357	0.353738	up	128637	C20orf140|WARBM4	MIM:611663|HGNC:HGNC:16133|Ensembl:ENSG00000125875|HPRD:15472|Vega:OTTHUMG00000031637	20	20p13	TBC1 domain family member 20		GO:0005783(endoplasmic reticulum)//GO:0031965(nuclear membrane)//GO:0030173(integral component of Golgi membrane)//GO:0005789(endoplasmic reticulum membrane)	GO:0005096(GTPase activator activity)//GO:0005515(protein binding)//GO:0017137(Rab GTPase binding)	GO:0034389(lipid particle organization)//GO:1902953(positive regulation of ER to Golgi vesicle-mediated transport)//GO:1902017(regulation of cilium assembly)//GO:0070309(lens fiber cell morphogenesis)//GO:0019068(virion assembly)//GO:0043547(positive regulation of GTPase activity)//GO:0072520(seminiferous tubule development)//GO:0090110(cargo loading into COPII-coated vesicle)//GO:0001675(acrosom…
UROD	ENSG00000126088	protein_coding	+	chr1:45477804-45481341	31.3025	14.626	2.14019	1.09774	0.04445	0.386656	up	7389	PCT|UPD	MIM:613521|HGNC:HGNC:12591|Ensembl:ENSG00000126088|HPRD:01441|Vega:OTTHUMG00000008949	1	1p34	uroporphyrinogen decarboxylase	hsa00860(Porphyrin and chlorophyll metabolism)//	GO:0005654(nucleoplasm)//GO:0005737(cytoplasm)//GO:0005829(cytosol)	GO:0004853(uroporphyrinogen decarboxylase activity)//GO:0005515(protein binding)//GO:0008198(ferrous iron binding)	GO:0006782(protoporphyrinogen IX biosynthetic process)//GO:0044281(small molecule metabolic process)//GO:0051597(response to methylmercury)//GO:0010039(response to iron ion)//GO:0032355(response to estradiol)//GO:0001889(liver development)//GO:0046689(response to mercury ion)//GO:0046502(uroporphyrinogen III metabolic process)//GO:0006783(heme biosynthetic process)//GO:0006778(porphyrin-containin…
ST3GAL3	ENSG00000126091	protein_coding	+	chr1:44115828-44396837	6.0946	2.32329	2.62326	1.39136	0.0315	0.331947	up	6487	EIEE15|MRT12|SIAT6|ST3GALII|ST3GalIII|ST3N	MIM:606494|HGNC:HGNC:10866|Ensembl:ENSG00000126091|HPRD:05930|Vega:OTTHUMG00000007561	1	1p34.1	ST3 beta-galactoside alpha-2,3-sialyltransferase 3	hsa00514(Other types of O-glycan biosynthesis)//hsa00533(Glycosaminoglycan biosynthesis - keratan sulfate)//hsa00601(Glycosphingolipid biosynthesis - lacto and neolacto series)//	GO:0016021(integral component of membrane)//GO:0005576(extracellular region)//GO:0005794(Golgi apparatus)//GO:0032580(Golgi cisterna membrane)//GO:0030173(integral component of Golgi membrane)//GO:0000139(Golgi membrane)	GO:0003836(beta-galactoside (CMP) alpha-2,3-sialyltransferase activity)//GO:0008373(sialyltransferase activity)//GO:0008118(N-acetyllactosaminide alpha-2,3-sialyltransferase activity)	GO:0044267(cellular protein metabolic process)//GO:0044281(small molecule metabolic process)//GO:0006488(dolichol-linked oligosaccharide biosynthetic process)//GO:0016266(O-glycan processing)//GO:0009311(oligosaccharide metabolic process)//GO:0030203(glycosaminoglycan metabolic process)//GO:0006493(protein O-linked glycosylation)//GO:0018146(keratan sulfate biosynthetic process)//GO:0005975(carbo…
XRCC3	ENSG00000126215	protein_coding	-	chr14:104019757-104181841	4.60626	0.355903	12.9425	3.69404	0.00685	0.153186	up	7517	CMM6	MIM:600675|HGNC:HGNC:12830|Ensembl:ENSG00000126215|HPRD:07201|Vega:OTTHUMG00000169228	14	14q32.3	X-ray repair complementing defective repair in Chinese hamster cells 3	hsa03440(Homologous recombination)	GO:0048471(perinuclear region of cytoplasm)//GO:0033063(Rad51B-Rad51C-Rad51D-XRCC2 complex)//GO:0000784(nuclear chromosome, telomeric region)//GO:0005739(mitochondrion)//GO:0005657(replication fork)//GO:0005654(nucleoplasm)//GO:0033065(Rad51C-XRCC3 complex)//GO:0005634(nucleus)//GO:0005737(cytoplasm)	GO:0000150(recombinase activity)//GO:0005524(ATP binding)//GO:0008094(DNA-dependent ATPase activity)//GO:0003697(single-stranded DNA binding)//GO:0000400(four-way junction DNA binding)//GO:0008821(crossover junction endodeoxyribonuclease activity)//GO:0005515(protein binding)//GO:0003677(DNA binding)//GO:0003690(double-stranded DNA binding)	GO:0007131(reciprocal meiotic recombination)//GO:0090267(positive regulation of mitotic cell cycle spindle assembly checkpoint)//GO:0000707(meiotic DNA recombinase assembly)//GO:0006974(cellular response to DNA damage stimulus)//GO:0042148(strand invasion)//GO:0006310(DNA recombination)//GO:0010212(response to ionizing radiation)//GO:0000724(double-strand break repair via homologous recombination…
IGFLR1	ENSG00000126246	protein_coding	-	chr19:36230057-36245420	3.18311	0.543722	5.85427	2.54949	0.0091	0.178244	up	79713	TMEM149|U2AF1L4	MIM:614143|HGNC:HGNC:23620|Ensembl:ENSG00000126246|HPRD:07996|Vega:OTTHUMG00000182064	19	19q13.12	IGF like family receptor 1		GO:0005886(plasma membrane)//GO:0016021(integral component of membrane)	GO:0005515(protein binding)
THRA	ENSG00000126351	protein_coding	+	chr17:38175349-38256978	12.7238	4.40411	2.88908	1.53061	0.0287	0.319809	up	7067	AR7|CHNG6|EAR7|ERB-T-1|ERBA|ERBA1|NR1A1|THRA1|THRA2|c-ERBA-1	MIM:190120|HGNC:HGNC:11796|Ensembl:ENSG00000126351|HPRD:07185|Vega:OTTHUMG00000133332	17	17q11.2	thyroid hormone receptor, alpha	hsa04080(Neuroactive ligand-receptor interaction)//hsa04919(Thyroid hormone signaling pathway)	GO:0005654(nucleoplasm)//GO:0005634(nucleus)//GO:0005739(mitochondrion)//GO:0005829(cytosol)	GO:0070324(thyroid hormone binding)//GO:0008270(zinc ion binding)//GO:0031490(chromatin DNA binding)//GO:0019904(protein domain specific binding)//GO:0032403(protein complex binding)//GO:0003700(transcription factor activity, sequence-specific DNA binding)//GO:0043565(sequence-specific DNA binding)//GO:0003707(steroid hormone receptor activity)//GO:0042803(protein homodimerization activity)//GO:0…	GO:0001889(liver development)//GO:0030218(erythrocyte differentiation)//GO:0001502(cartilage condensation)//GO:0050994(regulation of lipid catabolic process)//GO:0009409(response to cold)//GO:0001822(kidney development)//GO:0009755(hormone-mediated signaling pathway)//GO:0030878(thyroid gland development)//GO:0043401(steroid hormone mediated signaling pathway)//GO:0031667(response to nutrient lev…
CCR7	ENSG00000126353	protein_coding	-	chr17:38710020-38721724	2.5557	0.550465	4.64278	2.21499	0.0222	0.280367	up	1236	BLR2|CC-CKR-7|CCR-7|CD197|CDw197|CMKBR7|EBI1	MIM:600242|HGNC:HGNC:1608|Ensembl:ENSG00000126353|HPRD:02588|Vega:OTTHUMG00000133375	17	17q12-q21.2	chemokine (C-C motif) receptor 7	hsa04060(Cytokine-cytokine receptor interaction)//hsa04062(Chemokine signaling pathway)//hsa05202(Transcriptional misregulation in cancer)	GO:0009897(external side of plasma membrane)//GO:0005886(plasma membrane)//GO:0009986(cell surface)//GO:0016021(integral component of membrane)//GO:0005829(cytosol)//GO:0005622(intracellular)	GO:0016493(C-C chemokine receptor activity)//GO:0035757(chemokine (C-C motif) ligand 19 binding)//GO:0038117(C-C motif chemokine 19 receptor activity)//GO:0004930(G-protein coupled receptor activity)//GO:0038121(C-C motif chemokine 21 receptor activity)//GO:0035758(chemokine (C-C motif) ligand 21 binding)	GO:0002885(positive regulation of hypersensitivity)//GO:0051209(release of sequestered calcium ion into cytosol)//GO:0038115(chemokine (C-C motif) ligand 19 signaling pathway)//GO:0090630(activation of GTPase activity)//GO:0050862(positive regulation of T cell receptor signaling pathway)//GO:2000510(positive regulation of dendritic cell chemotaxis)//GO:0007204(positive regulation of cytosolic cal…
PRDX5	ENSG00000126432	protein_coding	+	chr11:64085559-64089283	21.3232	4.99325	4.2704	2.09437	0.01025	0.190031	up	25824	ACR1|AOEB166|B166|HEL-S-55|PLP|PMP20|PRDX6|PRXV|SBBI10|prx-V	MIM:606583|HGNC:HGNC:9355|Ensembl:ENSG00000126432|HPRD:05958|Vega:OTTHUMG00000168805	11	11q13	peroxiredoxin 5	hsa04146(Peroxisome)	GO:0005777(peroxisome)//GO:0048471(perinuclear region of cytoplasm)//GO:0031410(cytoplasmic vesicle)//GO:0005759(mitochondrial matrix)//GO:0005829(cytosol)//GO:0043231(intracellular membrane-bounded organelle)//GO:0005739(mitochondrion)//GO:0005782(peroxisomal matrix)//GO:0070062(extracellular exosome)//GO:0005634(nucleus)//GO:0005615(extracellular space)//GO:0005737(cytoplasm)	GO:0043027(cysteine-type endopeptidase inhibitor activity involved in apoptotic process)//GO:0051920(peroxiredoxin activity)//GO:0004601(peroxidase activity)//GO:0005102(receptor binding)//GO:0016209(antioxidant activity)//GO:0001016(RNA polymerase III regulatory region DNA binding)//GO:0072541(peroxynitrite reductase activity)//GO:0046983(protein dimerization activity)	GO:0055114(oxidation-reduction process)//GO:0051354(negative regulation of oxidoreductase activity)//GO:0016480(negative regulation of transcription from RNA polymerase III promoter)//GO:2001057(reactive nitrogen species metabolic process)//GO:0070995(NADPH oxidation)//GO:0006979(response to oxidative stress)//GO:0032967(positive regulation of collagen biosynthetic process)//GO:0010467(gene expre…
IRF3	ENSG00000126456	protein_coding	-	chr19:50162825-50177173	21.0712	5.62838	3.74377	1.90449	5e-05	0.00584669	up	3661	IIAE7	MIM:603734|HGNC:HGNC:6118|Ensembl:ENSG00000126456|HPRD:04769|Vega:OTTHUMG00000183287	19	19q13.33	interferon regulatory factor 3	hsa04620(Toll-like receptor signaling pathway)//hsa04622(RIG-I-like receptor signaling pathway)//hsa04623(Cytosolic DNA-sensing pathway)//hsa05133(Pertussis)//hsa05160(Hepatitis C)//hsa05161(Hepatitis B)//hsa05162(Measles)//hsa05164(Influenza A)//hsa05168(Herpes simplex infection)//hsa05169(Epstein-Barr virus infection)//hsa05203(Viral carcinogenesis)	GO:0005654(nucleoplasm)//GO:0005634(nucleus)//GO:0005737(cytoplasm)//GO:0005829(cytosol)	GO:0003712(transcription cofactor activity)//GO:0003700(transcription factor activity, sequence-specific DNA binding)//GO:0000978(RNA polymerase II core promoter proximal region sequence-specific DNA binding)//GO:0042802(identical protein binding)//GO:0001078(transcriptional repressor activity, RNA polymerase II core promoter proximal region sequence-specific binding)//GO:0000975(regulatory regio…	GO:0050715(positive regulation of cytokine secretion)//GO:0097300(programmed necrotic cell death)//GO:0043123(positive regulation of I-kappaB kinase/NF-kappaB signaling)//GO:0032480(negative regulation of type I interferon production)//GO:0035666(TRIF-dependent toll-like receptor signaling pathway)//GO:0034142(toll-like receptor 4 signaling pathway)//GO:0032728(positive regulation of interferon-b…
SCAF1	ENSG00000126461	protein_coding	+	chr19:50145381-50161899	2.63286	0.436442	6.03256	2.59277	0.00465	0.125363	up	58506	SRA1	HGNC:HGNC:30403|Ensembl:ENSG00000126461|HPRD:11604|Vega:OTTHUMG00000183238	19	19q13.3-q13.4	SR-related CTD-associated factor 1		GO:0005634(nucleus)	GO:0003723(RNA binding)//GO:0019904(protein domain specific binding)	GO:0006397(mRNA processing)//GO:0006366(transcription from RNA polymerase II promoter)//GO:0008380(RNA splicing)
PRR12	ENSG00000126464	protein_coding	+	chr19:50094899-50129696	3.91378	0.618301	6.32989	2.66218	0.00105	0.0526655	up	57479	KIAA1205	MIM:616633|HGNC:HGNC:29217|Ensembl:ENSG00000126464|Vega:OTTHUMG00000183275	19	19q13.33	proline rich 12			GO:0003677(DNA binding)
STAT5A	ENSG00000126561	protein_coding	+	chr17:40439564-40463961	24.1053	10.9019	2.21111	1.14477	0.0239	0.293622	up	6776	MGF|STAT5	MIM:601511|HGNC:HGNC:11366|Ensembl:ENSG00000126561|HPRD:03301|Vega:OTTHUMG00000150725	17	17q11.2	signal transducer and activator of transcription 5A	hsa04012(ErbB signaling pathway)//hsa04630(Jak-STAT signaling pathway)//hsa04917(Prolactin signaling pathway)//	GO:0005654(nucleoplasm)//GO:0005634(nucleus)//GO:0005737(cytoplasm)//GO:0005829(cytosol)	GO:0004871(signal transducer activity)//GO:0000979(RNA polymerase II core promoter sequence-specific DNA binding)//GO:0005515(protein binding)//GO:0003677(DNA binding)//GO:0003700(transcription factor activity, sequence-specific DNA binding)	GO:0006107(oxaloacetate metabolic process)//GO:0070668(positive regulation of mast cell proliferation)//GO:0042104(positive regulation of activated T cell proliferation)//GO:0046449(creatinine metabolic process)//GO:0019915(lipid storage)//GO:0045579(positive regulation of B cell differentiation)//GO:0061180(mammary gland epithelium development)//GO:0019530(taurine metabolic process)//GO:0060740(…
AHDC1	ENSG00000126705	protein_coding	-	chr1:27860545-27930942	2.01777	0.462	4.36748	2.1268	0.00235	0.0857441	up	27245	MRD25	MIM:615790|HGNC:HGNC:25230|Ensembl:ENSG00000126705|HPRD:10885|Vega:OTTHUMG00000003398	1	1p36.13	AT-hook DNA binding motif containing 1			GO:0003677(DNA binding)
AIF1L	ENSG00000126878	protein_coding	+	chr9:133971862-133998539	6.83301	1.55478	4.39484	2.13581	0.00015	0.0134799	up	83543	C9orf58|IBA2	HGNC:HGNC:28904|Ensembl:ENSG00000126878|HPRD:12967|Vega:OTTHUMG00000020817	9	9q34.13-q34.3	allograft inflammatory factor 1-like		GO:0015629(actin cytoskeleton)//GO:0043234(protein complex)//GO:0005884(actin filament)//GO:0070062(extracellular exosome)//GO:0005737(cytoplasm)//GO:0032587(ruffle membrane)//GO:0005925(focal adhesion)	GO:0051015(actin filament binding)//GO:0005509(calcium ion binding)
SLC10A3	ENSG00000126903	protein_coding	-	chrX:153715644-153719016	3.91425	0.892473	4.38583	2.13285	0.01795	0.253004	up	8273	DXS253E|P3	MIM:312090|HGNC:HGNC:22979|Ensembl:ENSG00000126903|HPRD:02418|Vega:OTTHUMG00000013369	X	Xq28	solute carrier family 10 member 3		GO:0016021(integral component of membrane)//GO:0005887(integral component of plasma membrane)	GO:0008508(bile acid:sodium symporter activity)	GO:0055085(transmembrane transport)//GO:0032526(response to retinoic acid)//GO:0015721(bile acid and bile salt transport)
MAP2K2	ENSG00000126934	protein_coding	-	chr19:4090318-4124126	11.982	4.29837	2.78757	1.47901	0.03225	0.3362	up	5605	CFC4|MAPKK2|MEK2|MKK2|PRKMK2	MIM:601263|HGNC:HGNC:6842|Ensembl:ENSG00000126934|HPRD:03164|Vega:OTTHUMG00000134286	19	19p13.3	mitogen-activated protein kinase kinase 2	hsa04010(MAPK signaling pathway)//hsa04012(ErbB signaling pathway)//hsa04014(Ras signaling pathway)//hsa04015(Rap1 signaling pathway)//hsa04022(cGMP-PKG signaling pathway)//hsa04024(cAMP signaling pathway)//hsa04066(HIF-1 signaling pathway)//hsa04068(FoxO signaling pathway)//hsa04071(Sphingolipid signaling pathway)//	GO:0005634(nucleus)//GO:0005576(extracellular region)//GO:0005874(microtubule)//GO:0005938(cell cortex)//GO:0048471(perinuclear region of cytoplasm)//GO:0005794(Golgi apparatus)//GO:0005770(late endosome)//GO:0005829(cytosol)//GO:0005739(mitochondrion)//GO:0005911(cell-cell junction)//GO:0005783(endoplasmic reticulum)//GO:0005778(peroxisomal membrane)//GO:0005769(early endosome)//GO:0005925(focal…	GO:0004674(protein serine/threonine kinase activity)//GO:0004672(protein kinase activity)//GO:0030165(PDZ domain binding)//GO:0097110(scaffold protein binding)//GO:0004712(protein serine/threonine/tyrosine kinase activity)//GO:0004708(MAP kinase kinase activity)//GO:0005524(ATP binding)//GO:0032947(protein complex scaffold)//GO:0043539(protein serine/threonine kinase activator activity)//GO:00047…	GO:0090170(regulation of Golgi inheritance)//GO:0048011(neurotrophin TRK receptor signaling pathway)//GO:0070371(ERK1 and ERK2 cascade)//GO:0000165(MAPK cascade)//GO:0050772(positive regulation of axonogenesis)//GO:0030878(thyroid gland development)//GO:0010629(negative regulation of gene expression)//GO:0032872(regulation of stress-activated MAPK cascade)//GO:0007507(heart development)//GO:00719…
CPSF3L	ENSG00000127054	protein_coding	-	chr1:1227755-1260071	23.4074	6.93449	3.3755	1.7551	0.00305	0.097055	up	54973	CPSF73L|INT11|INTS11|RC-68|RC68	MIM:611354|HGNC:HGNC:26052|Ensembl:ENSG00000127054|HPRD:13377|Vega:OTTHUMG00000003330	1	1p36.33	cleavage and polyadenylation specific factor 3-like		GO:0072562(blood microparticle)//GO:0005737(cytoplasm)//GO:0032039(integrator complex)	GO:0005515(protein binding)//GO:0016787(hydrolase activity)	GO:0016180(snRNA processing)
FGD3	ENSG00000127084	protein_coding	+	chr9:95709732-95798518	2.90975	0.695913	4.18121	2.06392	0.0102	0.189648	up	89846	ZFYVE5	HGNC:HGNC:16027|Ensembl:ENSG00000127084|HPRD:10957|Vega:OTTHUMG00000021032	9	-	FYVE, RhoGEF and PH domain containing 3	hsa04810(Regulation of actin cytoskeleton)	GO:0030027(lamellipodium)//GO:0005794(Golgi apparatus)//GO:0001726(ruffle)//GO:0005829(cytosol)//GO:0005856(cytoskeleton)//GO:0005737(cytoplasm)	GO:0005089(Rho guanyl-nucleotide exchange factor activity)//GO:0031267(small GTPase binding)//GO:0046872(metal ion binding)//GO:0005085(guanyl-nucleotide exchange factor activity)	GO:0008360(regulation of cell shape)//GO:0007010(cytoskeleton organization)//GO:0043065(positive regulation of apoptotic process)//GO:0007264(small GTPase mediated signal transduction)//GO:0043547(positive regulation of GTPase activity)//GO:0046847(filopodium assembly)//GO:0048011(neurotrophin TRK receptor signaling pathway)//GO:0035023(regulation of Rho protein signal transduction)//GO:0030036(a…
BCL11B	ENSG00000127152	protein_coding	-	chr14:99635623-99737861	3.67226	1.30429	2.81554	1.49341	0.0099	0.18585	up	64919	ATL1|ATL1-alpha|ATL1-beta|ATL1-delta|ATL1-gamma|CTIP-2|CTIP2|RIT1|ZNF856B|hRIT1-alpha	MIM:606558|HGNC:HGNC:13222|Ensembl:ENSG00000127152|HPRD:05950|Vega:OTTHUMG00000028967	14	14q32.2	B-cell CLL/lymphoma 11B		GO:0043005(neuron projection)//GO:0005634(nucleus)	GO:0003676(nucleic acid binding)//GO:0043565(sequence-specific DNA binding)//GO:0000978(RNA polymerase II core promoter proximal region sequence-specific DNA binding)//GO:0044212(transcription regulatory region DNA binding)//GO:0001077(transcriptional activator activity, RNA polymerase II core promoter proximal region sequence-specific binding)//GO:0046872(metal ion binding)//GO:0005515(protein b…	GO:0003382(epithelial cell morphogenesis)//GO:0010837(regulation of keratinocyte proliferation)//GO:0021773(striatal medium spiny neuron differentiation)//GO:0048538(thymus development)//GO:0045664(regulation of neuron differentiation)//GO:0071678(olfactory bulb axon guidance)//GO:0019216(regulation of lipid metabolic process)//GO:0021902(commitment of neuronal cell to specific neuron type in for…
TRAF2	ENSG00000127191	protein_coding	+	chr9:139776363-139821059	5.19856	0.699638	7.43035	2.89343	0.0021	0.0800847	up	7186	MGC:45012|TRAP|TRAP3	MIM:601895|HGNC:HGNC:12032|Ensembl:ENSG00000127191|HPRD:03538|Vega:OTTHUMG00000020952	9	9q34	TNF receptor associated factor 2	hsa04010(MAPK signaling pathway)//hsa04064(NF-kappa B signaling pathway)//hsa04071(Sphingolipid signaling pathway)//hsa04141(Protein processing in endoplasmic reticulum)//hsa04210(Apoptosis)//hsa04380(Osteoclast differentiation)//hsa04622(RIG-I-like receptor signaling pathway)//hsa04668(TNF signaling pathway)//hsa04920(Adipocytokine signaling pathway)//hsa04932(Non-alcoholic fatty liver disease (…	GO:0012506(vesicle membrane)//GO:0009898(cytoplasmic side of plasma membrane)//GO:0005938(cell cortex)//GO:1990597(AIP1-IRE1 complex)//GO:0035631(CD40 receptor complex)//GO:0005829(cytosol)//GO:1990604(IRE1-TRAF2-ASK1 complex)//GO:0045121(membrane raft)//GO:0097057(TRAF2-GSTP1 complex)//GO:0005622(intracellular)//GO:0005737(cytoplasm)//GO:0000151(ubiquitin ligase complex)	GO:0019903(protein phosphatase binding)//GO:0008270(zinc ion binding)//GO:0031625(ubiquitin protein ligase binding)//GO:0032403(protein complex binding)//GO:0019901(protein kinase binding)//GO:0004871(signal transducer activity)//GO:0004842(ubiquitin-protein transferase activity)//GO:0042802(identical protein binding)//GO:0031435(mitogen-activated protein kinase kinase kinase binding)//GO:0005174…	GO:0071550(death-inducing signaling complex assembly)//GO:0007249(I-kappaB kinase/NF-kappaB signaling)//GO:0070534(protein K63-linked ubiquitination)//GO:0097300(programmed necrotic cell death)//GO:0051291(protein heterooligomerization)//GO:0070266(necroptotic process)//GO:1901215(negative regulation of neuron death)//GO:0007166(cell surface receptor signaling pathway)//GO:0097296(activation of c…
PIN1	ENSG00000127445	protein_coding	+	chr19:9945932-9960358	5.74573	1.4711	3.90575	1.9656	0.01625	0.241708	up	5300	DOD|UBL5	MIM:601052|HGNC:HGNC:8988|Ensembl:ENSG00000127445|HPRD:03031|Vega:OTTHUMG00000180388	19	19p13	peptidylprolyl cis/trans isomerase, NIMA-interacting 1	hsa04622(RIG-I-like receptor signaling pathway)	GO:0043005(neuron projection)//GO:0005829(cytosol)//GO:0030496(midbody)//GO:0005739(mitochondrion)//GO:0016607(nuclear speck)//GO:0005654(nucleoplasm)//GO:0005634(nucleus)	GO:0008013(beta-catenin binding)//GO:0005515(protein binding)//GO:0050815(phosphoserine binding)//GO:0003774(motor activity)//GO:0050816(phosphothreonine binding)//GO:0003755(peptidyl-prolyl cis-trans isomerase activity)//GO:0031434(mitogen-activated protein kinase kinase binding)//GO:0032794(GTPase activating protein binding)	GO:2000146(negative regulation of cell motility)//GO:0032480(negative regulation of type I interferon production)//GO:0042177(negative regulation of protein catabolic process)//GO:0032091(negative regulation of protein binding)//GO:0001934(positive regulation of protein phosphorylation)//GO:0050808(synapse organization)//GO:0030512(negative regulation of transforming growth factor beta receptor s…
EPS15L1	ENSG00000127527	protein_coding	-	chr19:16466049-16582896	15.2114	6.78025	2.24348	1.16574	0.0201	0.267234	up	58513	EPS15R	MIM:616826|HGNC:HGNC:24634|Ensembl:ENSG00000127527|HPRD:09445|Vega:OTTHUMG00000182361	19	19p13.11	epidermal growth factor receptor pathway substrate 15-like 1	hsa04144(Endocytosis)	GO:0016020(membrane)//GO:0005886(plasma membrane)//GO:0005634(nucleus)//GO:0030132(clathrin coat of coated pit)	GO:0005515(protein binding)//GO:0005509(calcium ion binding)	GO:0006897(endocytosis)//GO:0007173(epidermal growth factor receptor signaling pathway)//GO:0042059(negative regulation of epidermal growth factor receptor signaling pathway)
KLF2	ENSG00000127528	protein_coding	+	chr19:16435627-16438685	16.6689	7.23647	2.30346	1.2038	0.0135	0.219104	up	10365	LKLF	MIM:602016|HGNC:HGNC:6347|Ensembl:ENSG00000127528|HPRD:03602|Vega:OTTHUMG00000182330	19	19p13.11	Kruppel-like factor 2	hsa04068(FoxO signaling pathway)	GO:0005634(nucleus)	GO:0043565(sequence-specific DNA binding)//GO:0046872(metal ion binding)//GO:0005515(protein binding)//GO:0003700(transcription factor activity, sequence-specific DNA binding)	GO:0000902(cell morphogenesis)//GO:0045429(positive regulation of nitric oxide biosynthetic process)//GO:0071409(cellular response to cycloheximide)//GO:1901653(cellular response to peptide)//GO:0035264(multicellular organism growth)//GO:0070301(cellular response to hydrogen peroxide)//GO:0040029(regulation of gene expression, epigenetic)//GO:0006351(transcription, DNA-templated)//GO:0071356(cell…
CHTF18	ENSG00000127586	protein_coding	+	chr16:834973-850737	2.49515	0.786685	3.17173	1.66527	0.01405	0.223545	up	63922	C16orf41|C321D2.2|C321D2.3|C321D2.4|CHL12|Ctf18|RUVBL	MIM:613201|HGNC:HGNC:18435|Ensembl:ENSG00000127586|HPRD:13059|Vega:OTTHUMG00000047838	16	16p13.3	chromosome transmission fidelity factor 18		GO:0005654(nucleoplasm)//GO:0005737(cytoplasm)//GO:0016020(membrane)	GO:0005524(ATP binding)//GO:0003677(DNA binding)	GO:0007049(cell cycle)//GO:0006260(DNA replication)
HIP1	ENSG00000127946	protein_coding	-	chr7:75162620-75368280	15.8715	8.4189	1.88522	0.914736	0.0135	0.219104	up	3092	HIP-I|ILWEQ|SHON|SHONbeta|SHONgamma	MIM:601767|HGNC:HGNC:4913|Ensembl:ENSG00000127946|HPRD:03461|Vega:OTTHUMG00000156050	7	7q11.23	huntingtin interacting protein 1	hsa05016(Huntington's disease)	GO:0030136(clathrin-coated vesicle)//GO:0030665(clathrin-coated vesicle membrane)//GO:0016020(membrane)//GO:0005794(Golgi apparatus)//GO:0043231(intracellular membrane-bounded organelle)//GO:0005634(nucleus)//GO:0005856(cytoskeleton)//GO:0005737(cytoplasm)	GO:0005515(protein binding)//GO:0035091(phosphatidylinositol binding)//GO:0003779(actin binding)//GO:0030276(clathrin binding)//GO:0005200(structural constituent of cytoskeleton)	GO:0072583(clathrin-mediated endocytosis)//GO:0097190(apoptotic signaling pathway)//GO:0048268(clathrin coat assembly)//GO:0006351(transcription, DNA-templated)//GO:0030154(cell differentiation)//GO:0042981(regulation of apoptotic process)//GO:0048260(positive regulation of receptor-mediated endocytosis)//GO:0006919(activation of cysteine-type endopeptidase activity involved in apoptotic process)…
TUBGCP6	ENSG00000128159	protein_coding	-	chr22:50656117-50683421	6.76776	2.30945	2.93047	1.55113	0.0026	0.0899619	up	85378	GCP-6|GCP6|MCCRP|MCCRP1|MCPHCR	MIM:610053|HGNC:HGNC:18127|Ensembl:ENSG00000128159|HPRD:15589|Vega:OTTHUMG00000030150	22	22q13.31-q13.33	tubulin gamma complex associated protein 6		GO:0070062(extracellular exosome)//GO:0005874(microtubule)//GO:0005815(microtubule organizing center)//GO:0000923(equatorial microtubule organizing center)//GO:0005829(cytosol)//GO:0005813(centrosome)//GO:0005816(spindle pole body)//GO:0008274(gamma-tubulin ring complex)//GO:0016020(membrane)//GO:0000922(spindle pole)	GO:0043015(gamma-tubulin binding)//GO:0008017(microtubule binding)//GO:0051011(microtubule minus-end binding)//GO:0005200(structural constituent of cytoskeleton)	GO:0007020(microtubule nucleation)//GO:0007126(meiotic nuclear division)//GO:0000278(mitotic cell cycle)//GO:0000226(microtubule cytoskeleton organization)//GO:0090307(mitotic spindle assembly)//GO:0031122(cytoplasmic microtubule organization)//GO:0051298(centrosome duplication)//GO:0000086(G2/M transition of mitotic cell cycle)//GO:0051415(interphase microtubule nucleation by interphase microtub…
APOL3	ENSG00000128284	protein_coding	-	chr22:36536371-36562225	47.302	10.5598	4.47945	2.16332	5e-05	0.00584669	up	80833	APOLIII|CG121|CG12_1|apoL-III	MIM:607253|HGNC:HGNC:14868|Ensembl:ENSG00000128284|HPRD:06264|Vega:OTTHUMG00000150632	22	22q13.1	apolipoprotein L3		GO:0016020(membrane)//GO:0005576(extracellular region)//GO:0005737(cytoplasm)	GO:0008289(lipid binding)//GO:0004871(signal transducer activity)//GO:0005319(lipid transporter activity)	GO:0006869(lipid transport)//GO:0006954(inflammatory response)//GO:0042157(lipoprotein metabolic process)//GO:0043123(positive regulation of I-kappaB kinase/NF-kappaB signaling)//GO:0007165(signal transduction)
SPECC1	ENSG00000128487	protein_coding	+	chr17:19912656-20306870	34.7119	20.1784	1.72025	0.782617	0.04515	0.388306	up	92521	CYTSB|HCMOGT-1|HCMOGT1|NSP	MIM:608793|HGNC:HGNC:30615|Ensembl:ENSG00000128487|HPRD:12301|Vega:OTTHUMG00000179808	17	17p11.2	sperm antigen with calponin homology and coiled-coil domains 1		GO:0016020(membrane)//GO:0005634(nucleus)
CDHR3	ENSG00000128536	protein_coding	+	chr7:105517241-105676877	5.32896	1.52362	3.49756	1.80635	0.01465	0.229517	up	222256	CDH28	MIM:615610|HGNC:HGNC:26308|Ensembl:ENSG00000128536|HPRD:08042|Vega:OTTHUMG00000157520	7	7q22.3	cadherin related family member 3		GO:0016020(membrane)//GO:0016021(integral component of membrane)//GO:0005886(plasma membrane)	GO:0001618(virus receptor activity)//GO:0005509(calcium ion binding)	GO:0007156(homophilic cell adhesion via plasma membrane adhesion molecules)//GO:0046718(viral entry into host cell)
CCDC136	ENSG00000128596	protein_coding	+	chr7:128430810-128462186	2.8667	0.439195	6.52718	2.70646	0.00125	0.0588926	up	64753	NAG6	MIM:611902|HGNC:HGNC:22225|Ensembl:ENSG00000128596|HPRD:10887|Vega:OTTHUMG00000158310	7	7q33	coiled-coil domain containing 136		GO:0016021(integral component of membrane)//GO:0005739(mitochondrion)	GO:0005515(protein binding)
MRPS12	ENSG00000128626	protein_coding	+	chr19:39405905-39466550	1.4072	0.0681346	20.6533	4.3683	0.00685	0.153186	up	6183	MPR-S12|MT-RPS12|RPMS12|RPS12|RPSM12	MIM:603021|HGNC:HGNC:10380|Ensembl:ENSG00000128626|HPRD:04316|Vega:OTTHUMG00000182692	19	19q13.1-q13.2	mitochondrial ribosomal protein S12	hsa03010(Ribosome)	GO:0005763(mitochondrial small ribosomal subunit)//GO:0005743(mitochondrial inner membrane)//GO:0005761(mitochondrial ribosome)	GO:0044822(poly(A) RNA binding)//GO:0003735(structural constituent of ribosome)//GO:0005515(protein binding)	GO:0070124(mitochondrial translational initiation)//GO:0006996(organelle organization)//GO:0006412(translation)//GO:0032543(mitochondrial translation)//GO:0070125(mitochondrial translational elongation)//GO:0070126(mitochondrial translational termination)
PDE11A	ENSG00000128655	protein_coding	-	chr2:178487979-178973066	4.29767	0.708228	6.06821	2.60127	0.0017	0.070661	up	50940	PPNAD2	MIM:604961|HGNC:HGNC:8773|Ensembl:ENSG00000128655|HPRD:05391|Vega:OTTHUMG00000154188	2	2q31.2	phosphodiesterase 11A	hsa00230(Purine metabolism)//hsa05032(Morphine addiction)	GO:0005575(cellular_component)//GO:0043204(perikaryon)//GO:0005829(cytosol)	GO:0047555(3',5'-cyclic-GMP phosphodiesterase activity)//GO:0030553(cGMP binding)//GO:0030552(cAMP binding)//GO:0004118(cGMP-stimulated cyclic-nucleotide phosphodiesterase activity)//GO:0046872(metal ion binding)//GO:0004112(cyclic-nucleotide phosphodiesterase activity)//GO:0004114(3',5'-cyclic-nucleotide phosphodiesterase activity)	GO:0046069(cGMP catabolic process)//GO:0007596(blood coagulation)//GO:0008152(metabolic process)//GO:0006198(cAMP catabolic process)//GO:0007165(signal transduction)
ARHGAP22	ENSG00000128805	protein_coding	-	chr10:49654076-49864310	8.33187	2.04731	4.06966	2.02491	0.0173	0.247998	up	58504	RhoGAP2|RhoGap22	MIM:610585|HGNC:HGNC:30320|Ensembl:ENSG00000128805|HPRD:12476|Vega:OTTHUMG00000018176	10	10q11.22	Rho GTPase activating protein 22		GO:0005634(nucleus)//GO:0005925(focal adhesion)//GO:0005829(cytosol)	GO:0005096(GTPase activator activity)//GO:0005515(protein binding)	GO:0006351(transcription, DNA-templated)//GO:0007264(small GTPase mediated signal transduction)//GO:0043547(positive regulation of GTPase activity)//GO:0030154(cell differentiation)//GO:0051056(regulation of small GTPase mediated signal transduction)//GO:0006355(regulation of transcription, DNA-templated)//GO:0001525(angiogenesis)//GO:0007165(signal transduction)
CGNL1	ENSG00000128849	protein_coding	+	chr15:57668164-57842925	9.90485	4.62748	2.14044	1.09791	0.0123	0.207253	up	84952	JACOP	MIM:607856|HGNC:HGNC:25931|Ensembl:ENSG00000128849|HPRD:09708|Vega:OTTHUMG00000166485	15	15q21.3	cingulin-like 1		GO:0005923(bicellular tight junction)//GO:0016459(myosin complex)	GO:0003774(motor activity)	GO:0008152(metabolic process)
IVD	ENSG00000128928	protein_coding	+	chr15:40697685-40728146	14.7056	5.14513	2.85817	1.51509	0.026	0.30587	up	3712	ACAD2	MIM:607036|HGNC:HGNC:6186|Ensembl:ENSG00000128928|HPRD:09516|Vega:OTTHUMG00000129984	15	15q14-q15	isovaleryl-CoA dehydrogenase	hsa00280(Valine, leucine and isoleucine degradation)//	GO:0005654(nucleoplasm)//GO:0031966(mitochondrial membrane)//GO:0005759(mitochondrial matrix)//GO:0005739(mitochondrion)	GO:0052890(oxidoreductase activity, acting on the CH-CH group of donors, with a flavin as acceptor)//GO:0003995(acyl-CoA dehydrogenase activity)//GO:0009055(electron carrier activity)//GO:0008470(isovaleryl-CoA dehydrogenase activity)//GO:0000062(fatty-acyl-CoA binding)//GO:0050660(flavin adenine dinucleotide binding)	GO:0055114(oxidation-reduction process)//GO:0044281(small molecule metabolic process)//GO:0009083(branched-chain amino acid catabolic process)//GO:0006552(leucine catabolic process)//GO:0055088(lipid homeostasis)//GO:0034641(cellular nitrogen compound metabolic process)//GO:0033539(fatty acid beta-oxidation using acyl-CoA dehydrogenase)
ISLR	ENSG00000129009	protein_coding	+	chr15:74445140-74471567	40.8472	22.3384	1.82857	0.870712	0.02515	0.300793	up	3671	HsT17563	MIM:602059|HGNC:HGNC:6133|Ensembl:ENSG00000129009|HPRD:03636|Vega:OTTHUMG00000137623	15	15q23-q24	immunoglobulin superfamily containing leucine-rich repeat		GO:0070062(extracellular exosome)		GO:0007155(cell adhesion)
ATP1B2	ENSG00000129244	protein_coding	+	chr17:7549944-7561086	3.27258	0.684876	4.77834	2.25651	0.0384	0.365922	up	482	AMOG	MIM:182331|HGNC:HGNC:805|Ensembl:ENSG00000129244|HPRD:01664|Vega:OTTHUMG00000178018	17	17p13.1	ATPase Na+/K+ transporting subunit beta 2	hsa04022(cGMP-PKG signaling pathway)//hsa04024(cAMP signaling pathway)//hsa04260(Cardiac muscle contraction)//hsa04261(Adrenergic signaling in cardiomyocytes)//hsa04911(Insulin secretion)//hsa04918(Thyroid hormone synthesis)//hsa04919(Thyroid hormone signaling pathway)//hsa04960(Aldosterone-regulated sodium reabsorption)//hsa04961(Endocrine and other factor-regulated calcium reabsorption)//hsa049…	GO:0005886(plasma membrane)//GO:0016324(apical plasma membrane)//GO:0005737(cytoplasm)//GO:0005890(sodium:potassium-exchanging ATPase complex)	GO:0005515(protein binding)//GO:0001671(ATPase activator activity)//GO:0005391(sodium:potassium-exchanging ATPase activity)//GO:0051117(ATPase binding)	GO:0036376(sodium ion export from cell)//GO:0086009(membrane repolarization)//GO:0050900(leukocyte migration)//GO:0034220(ion transmembrane transport)//GO:0061337(cardiac conduction)//GO:0032781(positive regulation of ATPase activity)//GO:1903278(positive regulation of sodium ion export from cell)//GO:0006813(potassium ion transport)//GO:1901018(positive regulation of potassium ion transmembrane …
SLC44A2	ENSG00000129353	protein_coding	+	chr19:10713132-10755235	31.6054	13.9558	2.26468	1.17931	0.02425	0.295862	up	57153	CTL2|PP1292	MIM:606106|HGNC:HGNC:17292|Ensembl:ENSG00000129353|HPRD:16198|Vega:OTTHUMG00000180585	19	19p13.1	solute carrier family 44 member 2	hsa05231(Choline metabolism in cancer)	GO:0005765(lysosomal membrane)//GO:0016021(integral component of membrane)//GO:0070062(extracellular exosome)//GO:0005886(plasma membrane)	GO:0004871(signal transducer activity)//GO:0015220(choline transmembrane transporter activity)	GO:0006644(phospholipid metabolic process)//GO:0044281(small molecule metabolic process)//GO:0043123(positive regulation of I-kappaB kinase/NF-kappaB signaling)//GO:0046474(glycerophospholipid biosynthetic process)//GO:0006656(phosphatidylcholine biosynthetic process)//GO:0015871(choline transport)//GO:0055085(transmembrane transport)//GO:0007165(signal transduction)
ADCY4	ENSG00000129467	protein_coding	-	chr14:24787554-24809251	17.2731	3.05167	5.66019	2.50085	5e-05	0.00584669	up	196883	AC4	MIM:600292|HGNC:HGNC:235|Ensembl:ENSG00000129467|HPRD:11614|Vega:OTTHUMG00000029347	14	14q12	adenylate cyclase 4	hsa00230(Purine metabolism)//hsa04015(Rap1 signaling pathway)//hsa04020(Calcium signaling pathway)//hsa04022(cGMP-PKG signaling pathway)//hsa04024(cAMP signaling pathway)//hsa04062(Chemokine signaling pathway)//	GO:0016021(integral component of membrane)//GO:0016020(membrane)//GO:0030425(dendrite)//GO:0043234(protein complex)//GO:0005886(plasma membrane)//GO:0005622(intracellular)//GO:0005737(cytoplasm)	GO:0005524(ATP binding)//GO:0016849(phosphorus-oxygen lyase activity)//GO:0031683(G-protein beta/gamma-subunit complex binding)//GO:0004016(adenylate cyclase activity)//GO:0046872(metal ion binding)//GO:0005515(protein binding)	GO:0009190(cyclic nucleotide biosynthetic process)//GO:0007189(adenylate cyclase-activating G-protein coupled receptor signaling pathway)//GO:0045087(innate immune response)//GO:0006833(water transport)//GO:0007268(synaptic transmission)//GO:0006171(cAMP biosynthetic process)//GO:0007173(epidermal growth factor receptor signaling pathway)//GO:0044281(small molecule metabolic process)//GO:0003091(…
RNASE1	ENSG00000129538	protein_coding	-	chr14:21269386-21271437	661.634	342.701	1.93064	0.949082	0.0494	0.403579	up	6035	RAC1|RIB1|RNS1	MIM:180440|HGNC:HGNC:10044|Ensembl:ENSG00000129538|HPRD:01591|Vega:OTTHUMG00000029603	14	14q11.2	ribonuclease A family member 1, pancreatic		GO:0070062(extracellular exosome)	GO:0003676(nucleic acid binding)//GO:0004522(ribonuclease A activity)//GO:0005515(protein binding)//GO:0004519(endonuclease activity)	GO:0090502(RNA phosphodiester bond hydrolysis, endonucleolytic)//GO:0090305(nucleic acid phosphodiester bond hydrolysis)
MAU2	ENSG00000129933	protein_coding	+	chr19:19386826-19469563	17.9517	5.98295	3.00047	1.58519	0.0037	0.109483	up	23383	KIAA0892|MAU2L|SCC4|mau-2	MIM:614560|HGNC:HGNC:29140|Ensembl:ENSG00000129933|HPRD:11117|Vega:OTTHUMG00000150188	19	19p13.11	MAU2 sister chromatid cohesion factor		GO:0005654(nucleoplasm)//GO:0005634(nucleus)//GO:0032116(SMC loading complex)//GO:0000785(chromatin)	GO:0047485(protein N-terminus binding)//GO:0005515(protein binding)	GO:0034088(maintenance of mitotic sister chromatid cohesion)//GO:0051301(cell division)//GO:0000278(mitotic cell cycle)
PRRG3	ENSG00000130032	protein_coding	+	chrX:150863595-150874396	1.86728	0.743023	2.51309	1.32946	0.03905	0.369036	up	79057	PRGP3|TMG3	MIM:300685|HGNC:HGNC:30798|Ensembl:ENSG00000130032|HPRD:06742	X	Xq28	proline rich Gla (G-carboxyglutamic acid) 3 (transmembrane)		GO:0016021(integral component of membrane)//GO:0005576(extracellular region)	GO:0005509(calcium ion binding)	GO:0008150(biological_process)
LRCH2	ENSG00000130224	protein_coding	-	chrX:114345184-114468635	2.90047	0.868477	3.33973	1.73973	0.01545	0.2354	up	57631	dA204F4.4	HGNC:HGNC:29292|Ensembl:ENSG00000130224|HPRD:06602|Vega:OTTHUMG00000022233	X	Xq23	leucine-rich repeats and calponin homology (CH) domain containing 2
FAM98C	ENSG00000130244	protein_coding	+	chr19:38893774-38916945	4.65317	0.846233	5.4987	2.45909	0.03935	0.370249	up	147965	-	HGNC:HGNC:27119|Ensembl:ENSG00000130244|HPRD:14077|Vega:OTTHUMG00000182084	19	19q13.2	family with sequence similarity 98 member C		GO:0072669(tRNA-splicing ligase complex)
GTPBP3	ENSG00000130299	protein_coding	+	chr19:17445728-17453544	4.04368	0.682584	5.92408	2.56659	5e-05	0.00584669	up	84705	COXPD23|GTPBG3|MSS1|MTGP1|THDF1	MIM:608536|HGNC:HGNC:14880|Ensembl:ENSG00000130299|HPRD:12255|Vega:OTTHUMG00000182766	19	19p13.11	GTP binding protein 3 (mitochondrial)		GO:0005739(mitochondrion)//GO:0005634(nucleus)	GO:0003924(GTPase activity)//GO:0005515(protein binding)//GO:0005525(GTP binding)	GO:0070900(mitochondrial tRNA modification)//GO:0010467(gene expression)//GO:0008033(tRNA processing)
PLVAP	ENSG00000130300	protein_coding	-	chr19:17462256-17488159	19.972	6.95134	2.8731	1.52261	0.00325	0.101099	up	83483	FELS|PV-1|PV1|gp68	MIM:607647|HGNC:HGNC:13635|Ensembl:ENSG00000130300|HPRD:09626|Vega:OTTHUMG00000182784	19	19p13.2	plasmalemma vesicle associated protein		GO:0016021(integral component of membrane)//GO:0048471(perinuclear region of cytoplasm)//GO:0009986(cell surface)//GO:0005901(caveola)//GO:0070062(extracellular exosome)	GO:0005515(protein binding)//GO:0042803(protein homodimerization activity)	GO:0002693(positive regulation of cellular extravasation)//GO:0000165(MAPK cascade)//GO:0033209(tumor necrosis factor-mediated signaling pathway)//GO:0070528(protein kinase C signaling)
BST2	ENSG00000130303	protein_coding	-	chr19:17513747-17516457	33.4459	9.87235	3.38785	1.76037	0.0043	0.119581	up	684	CD317|TETHERIN	MIM:600534|HGNC:HGNC:1119|Ensembl:ENSG00000130303|HPRD:02759|Vega:OTTHUMG00000165993	19	19p13.1	bone marrow stromal cell antigen 2		GO:0005886(plasma membrane)//GO:0005887(integral component of plasma membrane)//GO:0009986(cell surface)//GO:0016020(membrane)//GO:0031225(anchored component of membrane)//GO:0005794(Golgi apparatus)//GO:0005770(late endosome)//GO:0045121(membrane raft)//GO:0016324(apical plasma membrane)//GO:0070062(extracellular exosome)//GO:0005771(multivesicular body)//GO:0005737(cytoplasm)	GO:0044822(poly(A) RNA binding)//GO:0004871(signal transducer activity)//GO:0042803(protein homodimerization activity)//GO:0005515(protein binding)//GO:0008191(metalloendopeptidase inhibitor activity)	GO:0045071(negative regulation of viral genome replication)//GO:0030336(negative regulation of cell migration)//GO:0043123(positive regulation of I-kappaB kinase/NF-kappaB signaling)//GO:0045087(innate immune response)//GO:0007267(cell-cell signaling)//GO:0032956(regulation of actin cytoskeleton organization)//GO:1901253(negative regulation of intracellular transport of viral material)//GO:004211…
SLC27A1	ENSG00000130304	protein_coding	+	chr19:17579577-17632097	4.71572	0.742746	6.34905	2.66654	0.0023	0.0843957	up	376497	ACSVL5|FATP|FATP-1|FATP1	MIM:600691|HGNC:HGNC:10995|Ensembl:ENSG00000130304|HPRD:11863|Vega:OTTHUMG00000182878	19	19p13.11	solute carrier family 27 member 1	hsa03320(PPAR signaling pathway)//	GO:0016021(integral component of membrane)//GO:0005886(plasma membrane)//GO:0005901(caveola)//GO:0016020(membrane)//GO:0005743(mitochondrial inner membrane)//GO:0005783(endoplasmic reticulum)	GO:0004467(long-chain fatty acid-CoA ligase activity)//GO:0015245(fatty acid transporter activity)//GO:0042803(protein homodimerization activity)//GO:0000166(nucleotide binding)//GO:0031957(very long-chain fatty acid-CoA ligase activity)	GO:0044255(cellular lipid metabolic process)//GO:0006654(phosphatidic acid biosynthetic process)//GO:0044281(small molecule metabolic process)//GO:0033211(adiponectin-activated signaling pathway)//GO:0031652(positive regulation of heat generation)//GO:0032049(cardiolipin biosynthetic process)//GO:0071902(positive regulation of protein serine/threonine kinase activity)//GO:0006659(phosphatidylseri…
USHBP1	ENSG00000130307	protein_coding	-	chr19:17342691-17398455	2.87868	0.0786008	36.6241	5.19472	0.0002	0.0161758	up	83878	AIEBP|MCC2	MIM:611810|HGNC:HGNC:24058|Ensembl:ENSG00000130307|HPRD:18276|Vega:OTTHUMG00000182730	19	19p13	Usher syndrome 1C binding protein 1			GO:0030165(PDZ domain binding)//GO:0005515(protein binding)
KIAA1683	ENSG00000130518	protein_coding	-	chr19:18367907-18385319	8.96342	1.34951	6.64196	2.73161	0.0281	0.317122	up	80726	-	HGNC:HGNC:29350|Ensembl:ENSG00000130518|HPRD:13882|Vega:OTTHUMG00000183354	19	19p13.1	KIAA1683		GO:0005739(mitochondrion)//GO:0005634(nucleus)	GO:0005515(protein binding)
CYP2E1	ENSG00000130649	protein_coding	+	chr10:135192694-135383462	4.68849	0.91253	5.1379	2.36118	0.03615	0.355247	up	1571	CPE1|CYP2E|P450-J|P450C2E	MIM:124040|HGNC:HGNC:2631|Ensembl:ENSG00000130649|HPRD:11813|Vega:OTTHUMG00000019322	10	10q26.3	cytochrome P450 family 2 subfamily E member 1	hsa00140(Steroid hormone biosynthesis)//hsa00590(Arachidonic acid metabolism)//hsa00591(Linoleic acid metabolism)//hsa00980(Metabolism of xenobiotics by cytochrome P450)//hsa00982(Drug metabolism - cytochrome P450)//	GO:0031227(intrinsic component of endoplasmic reticulum membrane)//GO:0005739(mitochondrion)//GO:0005789(endoplasmic reticulum membrane)//GO:0000139(Golgi membrane)	GO:0004497(monooxygenase activity)//GO:0008395(steroid hydroxylase activity)//GO:0016705(oxidoreductase activity, acting on paired donors, with incorporation or reduction of molecular oxygen)//GO:0020037(heme binding)//GO:0019899(enzyme binding)//GO:0016491(oxidoreductase activity)//GO:0005506(iron ion binding)//GO:0019825(oxygen binding)//GO:0008392(arachidonic acid epoxygenase activity)//GO:001…	GO:0055114(oxidation-reduction process)//GO:0010193(response to ozone)//GO:0044281(small molecule metabolic process)//GO:0042493(response to drug)//GO:0006641(triglyceride metabolic process)//GO:0008202(steroid metabolic process)//GO:0046483(heterocycle metabolic process)//GO:0017144(drug metabolic process)//GO:0019373(epoxygenase P450 pathway)//GO:0016098(monoterpenoid metabolic process)//GO:000…
PNPLA7	ENSG00000130653	protein_coding	-	chr9:140354403-140444986	6.0954	1.10953	5.49367	2.45777	0.0018	0.0730958	up	375775	C9orf111|NTE-R1|NTEL1	MIM:612122|HGNC:HGNC:24768|Ensembl:ENSG00000130653|HPRD:12933|Vega:OTTHUMG00000020990	9	9q34.3	patatin like phospholipase domain containing 7	hsa00564(Glycerophospholipid metabolism)	GO:0005765(lysosomal membrane)//GO:0005783(endoplasmic reticulum)//GO:0016021(integral component of membrane)//GO:0031965(nuclear membrane)//GO:0031966(mitochondrial membrane)	GO:0004622(lysophospholipase activity)	GO:0006629(lipid metabolic process)//GO:0032502(developmental process)
PAK4	ENSG00000130669	protein_coding	+	chr19:39616409-39673456	3.83028	0.972084	3.94029	1.9783	0.00405	0.116122	up	10298	-	MIM:605451|HGNC:HGNC:16059|Ensembl:ENSG00000130669|HPRD:05675|Vega:OTTHUMG00000182800	19	19q13.2	p21 protein (Cdc42/Rac)-activated kinase 4	hsa04012(ErbB signaling pathway)//hsa04014(Ras signaling pathway)//hsa04360(Axon guidance)//hsa04510(Focal adhesion)//hsa04660(T cell receptor signaling pathway)//hsa04810(Regulation of actin cytoskeleton)//hsa05206(MicroRNAs in cancer)//hsa05211(Renal cell carcinoma)	GO:0005794(Golgi apparatus)//GO:0005925(focal adhesion)	GO:0004672(protein kinase activity)//GO:0005524(ATP binding)//GO:0004674(protein serine/threonine kinase activity)//GO:0005515(protein binding)//GO:0048365(Rac GTPase binding)	GO:0006915(apoptotic process)//GO:0032147(activation of protein kinase activity)//GO:0023014(signal transduction by protein phosphorylation)//GO:0006468(protein phosphorylation)//GO:0007346(regulation of mitotic cell cycle)//GO:0008283(cell proliferation)//GO:0016049(cell growth)//GO:0016477(cell migration)//GO:0007266(Rho protein signal transduction)//GO:0007049(cell cycle)//GO:0007010(cytoskele…
CEP85	ENSG00000130695	protein_coding	+	chr1:26560690-26605299	4.26793	1.66747	2.55951	1.35587	0.0461	0.390763	up	64793	CCDC21	HGNC:HGNC:25309|Ensembl:ENSG00000130695|HPRD:07844|Vega:OTTHUMG00000003380	1	1p36.11	centrosomal protein 85kDa		GO:0005794(Golgi apparatus)//GO:0005813(centrosome)//GO:0005730(nucleolus)//GO:0000242(pericentriolar material)//GO:0005737(cytoplasm)//GO:0000922(spindle pole)	GO:0005515(protein binding)	GO:0006469(negative regulation of protein kinase activity)//GO:0046602(regulation of mitotic centrosome separation)//GO:0007059(chromosome segregation)
LAMA5	ENSG00000130702	protein_coding	-	chr20:60877148-60942368	8.61665	1.54599	5.57356	2.4786	0.00045	0.02951	up	3911	-	MIM:601033|HGNC:HGNC:6485|Ensembl:ENSG00000130702|HPRD:03020|Vega:OTTHUMG00000032908	20	20q13.2-q13.3	laminin subunit alpha 5		GO:0005604(basement membrane)//GO:0070062(extracellular exosome)//GO:0005576(extracellular region)//GO:0005610(laminin-5 complex)//GO:0043260(laminin-11 complex)//GO:0043259(laminin-10 complex)//GO:0005605(basal lamina)//GO:0031012(extracellular matrix)//GO:0005634(nucleus)//GO:0005615(extracellular space)	GO:0005198(structural molecule activity)//GO:0005178(integrin binding)	GO:0007517(muscle organ development)//GO:0022617(extracellular matrix disassembly)//GO:0042384(cilium assembly)//GO:0016477(cell migration)//GO:0001738(morphogenesis of a polarized epithelium)//GO:0090002(establishment of protein localization to plasma membrane)//GO:0030155(regulation of cell adhesion)//GO:0048041(focal adhesion assembly)//GO:0030198(extracellular matrix organization)//GO:0001658…
HIP1R	ENSG00000130787	protein_coding	+	chr12:123318999-123347507	5.8784	1.1365	5.17235	2.37082	0.0244	0.296574	up	9026	HIP12|HIP3|ILWEQ	MIM:605613|HGNC:HGNC:18415|Ensembl:ENSG00000130787|HPRD:10412|Vega:OTTHUMG00000168765	12	12q24	huntingtin interacting protein 1 related		GO:0030136(clathrin-coated vesicle)//GO:0030665(clathrin-coated vesicle membrane)//GO:0048471(perinuclear region of cytoplasm)//GO:0043231(intracellular membrane-bounded organelle)//GO:0005856(cytoskeleton)//GO:0005737(cytoplasm)//GO:0005905(coated pit)	GO:0005515(protein binding)//GO:0035091(phosphatidylinositol binding)//GO:0003779(actin binding)//GO:0030276(clathrin binding)	GO:0006915(apoptotic process)//GO:0006898(receptor-mediated endocytosis)//GO:0072583(clathrin-mediated endocytosis)
GGT7	ENSG00000131067	protein_coding	-	chr20:33432522-33515769	3.72322	0.263334	14.1387	3.82158	0.028	0.316914	up	2686	D20S101|GGT4|GGTL3|GGTL5|dJ18C9.2	MIM:612342|HGNC:HGNC:4259|Ensembl:ENSG00000131067|HPRD:07488|Vega:OTTHUMG00000032314	20	20q11.22	gamma-glutamyltransferase 7	hsa00430(Taurine and hypotaurine metabolism)//hsa00460(Cyanoamino acid metabolism)//hsa00480(Glutathione metabolism)//	GO:0031362(anchored component of external side of plasma membrane)//GO:0016021(integral component of membrane)	GO:0005515(protein binding)//GO:0036374(glutathione hydrolase activity)//GO:0003840(gamma-glutamyltransferase activity)	GO:0006508(proteolysis)//GO:0019370(leukotriene biosynthetic process)//GO:0006750(glutathione biosynthetic process)//GO:0006749(glutathione metabolic process)
COX4I1	ENSG00000131143	protein_coding	+	chr16:85805363-85840650	99.8891	39.4148	2.5343	1.34159	0.0381	0.364674	up	1327	COX IV-1|COX4|COX4-1|COXIV|COXIV-1	MIM:123864|HGNC:HGNC:2265|Ensembl:ENSG00000131143|HPRD:00466|Vega:OTTHUMG00000137649	16	16q24.1	cytochrome c oxidase subunit 4I1	hsa00190(Oxidative phosphorylation)//	GO:0016021(integral component of membrane)//GO:0070062(extracellular exosome)//GO:0016020(membrane)//GO:0005743(mitochondrial inner membrane)//GO:0005751(mitochondrial respiratory chain complex IV)//GO:0005739(mitochondrion)//GO:0005634(nucleus)	GO:0004129(cytochrome-c oxidase activity)//GO:0005515(protein binding)	GO:0010467(gene expression)//GO:0044281(small molecule metabolic process)//GO:0007584(response to nutrient)//GO:0022904(respiratory electron transport chain)//GO:1902600(hydrogen ion transmembrane transport)//GO:0006123(mitochondrial electron transport, cytochrome c to oxygen)//GO:0044237(cellular metabolic process)//GO:0006367(transcription initiation from RNA polymerase II promoter)//GO:0006091…
IDO1	ENSG00000131203	protein_coding	+	chr8:39759793-39873910	6.35259	1.41152	4.50051	2.17009	0.04595	0.390344	up	3620	IDO|IDO-1|INDO	MIM:147435|HGNC:HGNC:6059|HPRD:00935	8	8p11.21	indoleamine 2,3-dioxygenase 1	hsa00380(Tryptophan metabolism)//	GO:0032421(stereocilium bundle)//GO:0030485(smooth muscle contractile fiber)//GO:0005829(cytosol)	GO:0020037(heme binding)//GO:0004833(tryptophan 2,3-dioxygenase activity)//GO:0033754(indoleamine 2,3-dioxygenase activity)//GO:0009055(electron carrier activity)//GO:0046872(metal ion binding)	GO:0055114(oxidation-reduction process)//GO:0036269(swimming behavior)//GO:0070233(negative regulation of T cell apoptotic process)//GO:0044281(small molecule metabolic process)//GO:0002376(immune system process)//GO:0002666(positive regulation of T cell tolerance induction)//GO:0032693(negative regulation of interleukin-10 production)//GO:0034276(kynurenic acid biosynthetic process)//GO:0033555(…
RAB11FIP4	ENSG00000131242	protein_coding	+	chr17:29718641-29865236	1.25345	0.357135	3.50975	1.81137	0.01585	0.238685	up	84440	RAB11-FIP4	MIM:611999|HGNC:HGNC:30267|Ensembl:ENSG00000131242|HPRD:11466|Vega:OTTHUMG00000132787	17	17q11.2	RAB11 family interacting protein 4 (class II)	hsa04144(Endocytosis)	GO:0030139(endocytic vesicle)//GO:0055038(recycling endosome membrane)//GO:0005768(endosome)//GO:0005815(microtubule organizing center)//GO:0030496(midbody)//GO:0005819(spindle)//GO:0032154(cleavage furrow)//GO:0005615(extracellular space)	GO:0030306(ADP-ribosylation factor binding)//GO:0017137(Rab GTPase binding)//GO:0005515(protein binding)//GO:0005509(calcium ion binding)//GO:0042803(protein homodimerization activity)	GO:0006810(transport)//GO:0000910(cytokinesis)//GO:0016032(viral process)
GALNT15	ENSG00000131386	protein_coding	+	chr3:16216155-16273499	23.9943	5.29796	4.52896	2.17918	5e-05	0.00584669	up	117248	GALNACT15|GALNT13|GALNT7|GALNTL2|PIH5|pp-GalNAc-T15	MIM:615131|HGNC:HGNC:21531|Ensembl:ENSG00000131386|HPRD:13563|Vega:OTTHUMG00000156893	3	3p25.1	polypeptide N-acetylgalactosaminyltransferase 15	hsa00512(Mucin type O-Glycan biosynthesis)//	GO:0030133(transport vesicle)//GO:0016021(integral component of membrane)//GO:0000139(Golgi membrane)	GO:0004653(polypeptide N-acetylgalactosaminyltransferase activity)//GO:0030246(carbohydrate binding)//GO:0016757(transferase activity, transferring glycosyl groups)//GO:0046872(metal ion binding)	GO:0006493(protein O-linked glycosylation)//GO:0043687(post-translational protein modification)//GO:0016266(O-glycan processing)//GO:0044267(cellular protein metabolic process)//GO:0006486(protein glycosylation)
AOC3	ENSG00000131471	protein_coding	+	chr17:41003200-41010147	60.9619	22.8748	2.66503	1.41415	0.0145	0.227718	up	8639	HPAO|SSAO|VAP-1|VAP1	MIM:603735|HGNC:HGNC:550|Ensembl:ENSG00000131471|HPRD:04770|Vega:OTTHUMG00000180656	17	17q21	amine oxidase, copper containing 3	hsa00260(Glycine, serine and threonine metabolism)//hsa00350(Tyrosine metabolism)//hsa00360(Phenylalanine metabolism)//hsa00410(beta-Alanine metabolism)//	GO:0005886(plasma membrane)//GO:0009986(cell surface)//GO:0005794(Golgi apparatus)//GO:0016021(integral component of membrane)//GO:0005902(microvillus)//GO:0005783(endoplasmic reticulum)//GO:0005769(early endosome)//GO:0005737(cytoplasm)	GO:0046982(protein heterodimerization activity)//GO:0052593(tryptamine:oxygen oxidoreductase (deaminating) activity)//GO:0042803(protein homodimerization activity)//GO:0005507(copper ion binding)//GO:0048038(quinone binding)//GO:0008131(primary amine oxidase activity)//GO:0052596(phenethylamine:oxygen oxidoreductase (deaminating) activity)//GO:0052595(aliphatic-amine oxidase activity)//GO:0005515…	GO:0055114(oxidation-reduction process)//GO:0044281(small molecule metabolic process)//GO:0009308(amine metabolic process)//GO:0007155(cell adhesion)//GO:0006954(inflammatory response)//GO:0046677(response to antibiotic)//GO:0006805(xenobiotic metabolic process)
AOC2	ENSG00000131480	protein_coding	+	chr17:40996616-41002724	1.63214	0.0544165	29.9935	4.90658	0.0016	0.0678114	up	314	DAO2|RAO	MIM:602268|HGNC:HGNC:549|Ensembl:ENSG00000131480|HPRD:11889|Vega:OTTHUMG00000180655	17	17q21	amine oxidase, copper containing 2	hsa00260(Glycine, serine and threonine metabolism)//hsa00350(Tyrosine metabolism)//hsa00360(Phenylalanine metabolism)//hsa00410(beta-Alanine metabolism)//	GO:0005886(plasma membrane)//GO:0005737(cytoplasm)	GO:0052593(tryptamine:oxygen oxidoreductase (deaminating) activity)//GO:0005507(copper ion binding)//GO:0048038(quinone binding)//GO:0009055(electron carrier activity)//GO:0008131(primary amine oxidase activity)//GO:0052596(phenethylamine:oxygen oxidoreductase (deaminating) activity)//GO:0052595(aliphatic-amine oxidase activity)//GO:0052594(aminoacetone:oxygen oxidoreductase(deaminating) activity)	GO:0055114(oxidation-reduction process)//GO:0044281(small molecule metabolic process)//GO:0006584(catecholamine metabolic process)//GO:0007601(visual perception)//GO:0006805(xenobiotic metabolic process)//GO:0009308(amine metabolic process)
PPP1R1B	ENSG00000131771	protein_coding	+	chr17:37782992-37792879	4.70344	0.42147	11.1597	3.48022	0.0038	0.110422	up	84152	DARPP-32|DARPP32	MIM:604399|HGNC:HGNC:9287|Ensembl:ENSG00000131771|HPRD:05097|Vega:OTTHUMG00000133210	17	17q12	protein phosphatase 1 regulatory inhibitor subunit 1B	hsa04024(cAMP signaling pathway)//hsa04728(Dopaminergic synapse)//hsa05030(Cocaine addiction)//hsa05031(Amphetamine addiction)//hsa05034(Alcoholism)	GO:0005634(nucleus)//GO:0043025(neuronal cell body)//GO:0005737(cytoplasm)//GO:0005829(cytosol)	GO:0004860(protein kinase inhibitor activity)//GO:0004865(protein serine/threonine phosphatase inhibitor activity)//GO:0004864(protein phosphatase inhibitor activity)//GO:0031752(D5 dopamine receptor binding)//GO:0008599(protein phosphatase type 1 regulator activity)//GO:0031750(D3 dopamine receptor binding)//GO:0031749(D2 dopamine receptor binding)//GO:0031748(D1 dopamine receptor binding)//GO:0…	GO:0043086(negative regulation of catalytic activity)//GO:0007621(negative regulation of female receptivity)//GO:0006351(transcription, DNA-templated)//GO:0008542(visual learning)//GO:0050790(regulation of catalytic activity)//GO:1904030(negative regulation of cyclin-dependent protein kinase activity)//GO:0001975(response to amphetamine)//GO:0035556(intracellular signal transduction)//GO:0007165(…
PIAS3	ENSG00000131788	protein_coding	+	chr1:145575232-145589439	14.2015	7.13664	1.98994	0.992722	0.04885	0.402032	up	10401	ZMIZ5	MIM:605987|HGNC:HGNC:16861|Ensembl:ENSG00000131788|HPRD:09068|Vega:OTTHUMG00000013750	1	1q21	protein inhibitor of activated STAT 3	hsa04120(Ubiquitin mediated proteolysis)//hsa04630(Jak-STAT signaling pathway)	GO:0045202(synapse)//GO:0005654(nucleoplasm)//GO:0030425(dendrite)//GO:0016607(nuclear speck)//GO:0005737(cytoplasm)	GO:0008270(zinc ion binding)//GO:0015459(potassium channel regulator activity)//GO:0019899(enzyme binding)//GO:0019789(SUMO transferase activity)//GO:0016874(ligase activity)//GO:0047485(protein N-terminus binding)//GO:0005515(protein binding)//GO:0008022(protein C-terminus binding)	GO:0033235(positive regulation of protein sumoylation)//GO:0033234(negative regulation of protein sumoylation)//GO:0044267(cellular protein metabolic process)//GO:0008152(metabolic process)//GO:0010628(positive regulation of gene expression)//GO:0006351(transcription, DNA-templated)//GO:0045838(positive regulation of membrane potential)//GO:0043687(post-translational protein modification)//GO:000…
CC2D1A	ENSG00000132024	protein_coding	+	chr19:13993160-14041692	7.54939	0.844197	8.9427	3.16071	0.00015	0.0134799	up	54862	FREUD-1|Freud-1/Aki1|MRT3	MIM:610055|HGNC:HGNC:30237|Ensembl:ENSG00000132024|HPRD:08616|Vega:OTTHUMG00000181852	19	19p13.12	coiled-coil and C2 domain containing 1A		GO:0005815(microtubule organizing center)//GO:0070062(extracellular exosome)//GO:0005634(nucleus)//GO:0005737(cytoplasm)//GO:0016020(membrane)	GO:0004871(signal transducer activity)//GO:0000981(RNA polymerase II transcription factor activity, sequence-specific DNA binding)//GO:0000978(RNA polymerase II core promoter proximal region sequence-specific DNA binding)//GO:0001078(transcriptional repressor activity, RNA polymerase II core promoter proximal region sequence-specific binding)	GO:0006351(transcription, DNA-templated)//GO:0043123(positive regulation of I-kappaB kinase/NF-kappaB signaling)//GO:0000122(negative regulation of transcription from RNA polymerase II promoter)//GO:0007165(signal transduction)
SCLY	ENSG00000132330	protein_coding	+	chr2:238875468-239008054	8.56027	2.08679	4.10212	2.03637	0.0029	0.09541	up	51540	SCL|hSCL	MIM:611056|HGNC:HGNC:18161|Ensembl:ENSG00000132330|HPRD:15303|Vega:OTTHUMG00000133336	2	2q37.3	selenocysteine lyase	hsa00450(Selenocompound metabolism)//	GO:0005829(cytosol)	GO:0003824(catalytic activity)//GO:0009000(selenocysteine lyase activity)//GO:0005515(protein binding)//GO:0016740(transferase activity)	GO:0001887(selenium compound metabolic process)//GO:0008152(metabolic process)//GO:0044281(small molecule metabolic process)//GO:0006520(cellular amino acid metabolic process)//GO:0034641(cellular nitrogen compound metabolic process)
INPP5K	ENSG00000132376	protein_coding	-	chr17:1397864-1420182	14.5412	4.38836	3.31358	1.72839	0.0016	0.0678114	up	51763	PPS|SKIP	MIM:607875|HGNC:HGNC:33882|Ensembl:ENSG00000132376|HPRD:08489|Vega:OTTHUMG00000150648	17	17p13.3	inositol polyphosphate-5-phosphatase K	hsa00562(Inositol phosphate metabolism)//	GO:0005886(plasma membrane)//GO:0005802(trans-Golgi network)//GO:0043005(neuron projection)//GO:0016020(membrane)//GO:0048471(perinuclear region of cytoplasm)//GO:0001726(ruffle)//GO:0005829(cytosol)//GO:0005783(endoplasmic reticulum)//GO:0005634(nucleus)//GO:0032587(ruffle membrane)//GO:0005737(cytoplasm)	GO:0004445(inositol-polyphosphate 5-phosphatase activity)//GO:0052658(inositol-1,4,5-trisphosphate 5-phosphatase activity)//GO:0052659(inositol-1,3,4,5-tetrakisphosphate 5-phosphatase activity)//GO:0034594(phosphatidylinositol trisphosphate phosphatase activity)//GO:0042577(lipid phosphatase activity)//GO:0016312(inositol bisphosphate phosphatase activity)//GO:0046030(inositol trisphosphate phosp…	GO:0006644(phospholipid metabolic process)//GO:0046856(phosphatidylinositol dephosphorylation)//GO:0071320(cellular response to cAMP)//GO:0005979(regulation of glycogen biosynthetic process)//GO:0043407(negative regulation of MAP kinase activity)//GO:0072661(protein targeting to plasma membrane)//GO:2001153(positive regulation of renal water transport)//GO:0045893(positive regulation of transcrip…
IGJ	ENSG00000132465	protein_coding	-	chr4:71494460-71552533	185.149	18.2595	10.1398	3.34196	5e-05	0.00584669	up
MTSS1L	ENSG00000132613	protein_coding	-	chr16:70695106-70719969	2.73382	1.09256	2.50222	1.32321	0.0182	0.25504	up	92154	ABBA-1	HGNC:HGNC:25094|Ensembl:ENSG00000132613|HPRD:14289|Vega:OTTHUMG00000177023	16	16q22.1	metastasis suppressor 1-like			GO:0003779(actin binding)	GO:0007009(plasma membrane organization)
DPH2	ENSG00000132768	protein_coding	+	chr1:44435671-44439041	4.73062	1.06759	4.43112	2.14767	0.00095	0.0486555	up	1802	DPH2L2	MIM:603456|HGNC:HGNC:3004|Ensembl:ENSG00000132768|HPRD:16023|Vega:OTTHUMG00000008295	1	1p34	DPH2 homolog		GO:0005829(cytosol)	GO:0090560(2-(3-amino-3-carboxypropyl)histidine synthase activity)//GO:0005515(protein binding)	GO:0043687(post-translational protein modification)//GO:0044267(cellular protein metabolic process)//GO:0017183(peptidyl-diphthamide biosynthetic process from peptidyl-histidine)
RBM38	ENSG00000132819	protein_coding	+	chr20:55959215-55984389	2.20704	0.461536	4.78195	2.2576	0.01325	0.217778	up	55544	HSRNASEB|RNPC1|SEB4B|SEB4D|dJ800J21.2	MIM:612428|HGNC:HGNC:15818|Ensembl:ENSG00000132819|HPRD:15268|Vega:OTTHUMG00000032820	20	20q13.31	RNA binding motif protein 38		GO:0005634(nucleus)//GO:0005829(cytosol)	GO:0044822(poly(A) RNA binding)//GO:0000166(nucleotide binding)//GO:0003676(nucleic acid binding)//GO:0003730(mRNA 3'-UTR binding)//GO:0003729(mRNA binding)	GO:0010830(regulation of myotube differentiation)//GO:0008380(RNA splicing)//GO:0007049(cell cycle)//GO:0007050(cell cycle arrest)//GO:0030154(cell differentiation)//GO:0006978(DNA damage response, signal transduction by p53 class mediator resulting in transcription of p21 class mediator)//GO:0008285(negative regulation of cell proliferation)//GO:0006397(mRNA processing)//GO:0006977(DNA damage re…
CHRM3	ENSG00000133019	protein_coding	+	chr1:239549864-240080255	4.53387	0.53028	8.54997	3.09592	0.03615	0.355247	up	1131	EGBRS|HM3|PBS	MIM:118494|HGNC:HGNC:1952|Ensembl:ENSG00000133019|HPRD:00329	1	1q43	cholinergic receptor, muscarinic 3	hsa04020(Calcium signaling pathway)//hsa04080(Neuroactive ligand-receptor interaction)//hsa04725(Cholinergic synapse)//hsa04742(Taste transduction)//hsa04810(Regulation of actin cytoskeleton)//hsa04911(Insulin secretion)//hsa04970(Salivary secretion)//hsa04971(Gastric acid secretion)//hsa04972(Pancreatic secretion)	GO:0043679(axon terminus)//GO:0045202(synapse)//GO:0005886(plasma membrane)//GO:0005887(integral component of plasma membrane)//GO:0032279(asymmetric synapse)//GO:0030425(dendrite)//GO:0016323(basolateral plasma membrane)//GO:0030054(cell junction)//GO:0045211(postsynaptic membrane)	GO:0004435(phosphatidylinositol phospholipase C activity)//GO:0004872(receptor activity)//GO:0016907(G-protein coupled acetylcholine receptor activity)//GO:0042166(acetylcholine binding)//GO:0008144(drug binding)//GO:0005515(protein binding)	GO:0007207(phospholipase C-activating G-protein coupled acetylcholine receptor signaling pathway)//GO:0007271(synaptic transmission, cholinergic)//GO:0050796(regulation of insulin secretion)//GO:0044281(small molecule metabolic process)//GO:0003056(regulation of vascular smooth muscle contraction)//GO:0045987(positive regulation of smooth muscle contraction)//GO:0007213(G-protein coupled acetylch…
BEX2	ENSG00000133134	protein_coding	-	chrX:102564273-102565974	1.31671	0	inf	inf	5e-05	0.00584669	up	84707	BEX1|DJ79P11.1	MIM:300691|HGNC:HGNC:30933|Ensembl:ENSG00000133134|HPRD:06484|Vega:OTTHUMG00000022095	X	Xq22	brain expressed X-linked 2		GO:0005634(nucleus)//GO:0005737(cytoplasm)	GO:0005515(protein binding)	GO:0007049(cell cycle)//GO:0006915(apoptotic process)//GO:0042981(regulation of apoptotic process)//GO:0051726(regulation of cell cycle)
BTBD2	ENSG00000133243	protein_coding	-	chr19:1985446-2034880	5.51488	2.43783	2.26221	1.17773	0.03535	0.352429	up	55643	-	MIM:608531|HGNC:HGNC:15504|Ensembl:ENSG00000133243|HPRD:12252|Vega:OTTHUMG00000180017	19	19p13.3	BTB domain containing 2		GO:0000932(cytoplasmic mRNA processing body)	GO:0005515(protein binding)
MACROD1	ENSG00000133315	protein_coding	-	chr11:63742078-63933578	1.6858	0.31569	5.34004	2.41685	0.01105	0.196241	up	28992	LRP16	MIM:610400|HGNC:HGNC:29598|Ensembl:ENSG00000133315|HPRD:17448|Vega:OTTHUMG00000167843	11	11q11	MACRO domain containing 1		GO:0005739(mitochondrion)//GO:0005634(nucleus)	GO:0005515(protein binding)//GO:0016798(hydrolase activity, acting on glycosyl bonds)//GO:0019213(deacetylase activity)	GO:0042278(purine nucleoside metabolic process)//GO:0051725(protein de-ADP-ribosylation)//GO:0006974(cellular response to DNA damage stimulus)
PDZD2	ENSG00000133401	protein_coding	+	chr5:31639516-32122047	33.5138	9.60036	3.4909	1.8036	0.0303	0.327662	up	23037	AIPC|PAPIN|PDZK3|PIN1	MIM:610697|HGNC:HGNC:18486|Ensembl:ENSG00000133401|HPRD:10142|Vega:OTTHUMG00000161981	5	5p13.3	PDZ domain containing 2		GO:0005783(endoplasmic reticulum)//GO:0005634(nucleus)//GO:0005576(extracellular region)//GO:0005911(cell-cell junction)//GO:0005737(cytoplasm)		GO:0007155(cell adhesion)
GIMAP6	ENSG00000133561	protein_coding	-	chr7:150322462-150329473	16.6734	9.48422	1.75801	0.813945	0.0401	0.372253	up	474344	IAN-2|IAN-6|IAN2|IAN6	HGNC:HGNC:21918|Ensembl:ENSG00000133561|HPRD:13576|Vega:OTTHUMG00000159137	7	-	GTPase, IMAP family member 6		GO:0005829(cytosol)	GO:0005525(GTP binding)
MKRN1	ENSG00000133606	protein_coding	-	chr7:140152839-140179369	35.6667	20.7812	1.7163	0.779301	0.0459	0.39009	up	23608	RNF61	MIM:607754|HGNC:HGNC:7112|Ensembl:ENSG00000133606|HPRD:09673|Vega:OTTHUMG00000157412	7	7q34	makorin ring finger protein 1		GO:0005575(cellular_component)	GO:0008270(zinc ion binding)//GO:0004842(ubiquitin-protein transferase activity)//GO:0003682(chromatin binding)//GO:0016874(ligase activity)//GO:0044822(poly(A) RNA binding)//GO:0046872(metal ion binding)//GO:0005515(protein binding)	GO:0000209(protein polyubiquitination)
TMTC1	ENSG00000133687	protein_coding	-	chr12:29653772-29937692	21.9016	11.2142	1.95303	0.965711	0.0148	0.231121	up	83857	ARG99|OLF|TMTC1A	MIM:615855|HGNC:HGNC:24099|Ensembl:ENSG00000133687|HPRD:12472|Vega:OTTHUMG00000169324	12	12p11.22	transmembrane and tetratricopeptide repeat containing 1		GO:0016021(integral component of membrane)//GO:0005739(mitochondrion)
CATSPERB	ENSG00000133962	protein_coding	-	chr14:92047039-92333880	1.01534	0	inf	inf	0.01035	0.190611	up	79820	C14orf161|CatSper(beta)	MIM:611169|HGNC:HGNC:20500|Ensembl:ENSG00000133962|HPRD:16613|Vega:OTTHUMG00000171118	14	14q32.12	cation channel sperm associated auxiliary subunit beta		GO:0005886(plasma membrane)//GO:0005929(cilium)//GO:0036128(CatSper complex)		GO:0007338(single fertilization)//GO:0032504(multicellular organism reproduction)//GO:0007275(multicellular organism development)//GO:0048240(sperm capacitation)//GO:0035036(sperm-egg recognition)
CTIF	ENSG00000134030	protein_coding	+	chr18:46065416-46389588	23.1634	4.44996	5.2053	2.37998	0.0006	0.0359463	up	9811	Gm672|KIAA0427	MIM:613178|HGNC:HGNC:23925|Ensembl:ENSG00000134030|HPRD:11083|Vega:OTTHUMG00000132656	18	18q21.1	CBP80/20-dependent translation initiation factor		GO:0048471(perinuclear region of cytoplasm)//GO:0005737(cytoplasm)	GO:0003723(RNA binding)//GO:0005515(protein binding)	GO:0000184(nuclear-transcribed mRNA catabolic process, nonsense-mediated decay)//GO:0006446(regulation of translational initiation)
CHL1	ENSG00000134121	protein_coding	+	chr3:237440-451090	11.7553	2.284	5.14678	2.36367	0.00275	0.0933221	up	10752	CALL|L1CAM2	MIM:607416|HGNC:HGNC:1939|Ensembl:ENSG00000134121|HPRD:07598|Vega:OTTHUMG00000090601	3	3p26.1	cell adhesion molecule L1 like		GO:0016021(integral component of membrane)//GO:0070062(extracellular exosome)//GO:0045177(apical part of cell)//GO:0030425(dendrite)//GO:0005886(plasma membrane)//GO:0005578(proteinaceous extracellular matrix)	GO:0002020(protease binding)	GO:0007411(axon guidance)//GO:0043524(negative regulation of neuron apoptotic process)//GO:0007155(cell adhesion)//GO:0035640(exploration behavior)//GO:0001764(neuron migration)//GO:0050890(cognition)//GO:0008344(adult locomotory behavior)//GO:0007165(signal transduction)
IL15RA	ENSG00000134470	protein_coding	-	chr10:5990854-6020150	3.37306	0.317439	10.6259	3.40951	5e-05	0.00584669	up	3601	CD215	MIM:601070|HGNC:HGNC:5978|Ensembl:ENSG00000134470|HPRD:03045|Vega:OTTHUMG00000017612	10	10p15.1	interleukin 15 receptor subunit alpha	hsa04060(Cytokine-cytokine receptor interaction)//hsa04630(Jak-STAT signaling pathway)//hsa04672(Intestinal immune network for IgA production)//hsa05166(HTLV-I infection)	GO:0005886(plasma membrane)//GO:0030659(cytoplasmic vesicle membrane)//GO:0031965(nuclear membrane)//GO:0005789(endoplasmic reticulum membrane)//GO:0016021(integral component of membrane)//GO:0000139(Golgi membrane)//GO:0031410(cytoplasmic vesicle)//GO:0005615(extracellular space)	GO:0004871(signal transducer activity)//GO:0004896(cytokine receptor activity)//GO:0005515(protein binding)	GO:0010977(negative regulation of neuron projection development)//GO:0031667(response to nutrient levels)//GO:0008283(cell proliferation)//GO:0007259(JAK-STAT cascade)//GO:0032825(positive regulation of natural killer cell differentiation)//GO:0019221(cytokine-mediated signaling pathway)//GO:0007165(signal transduction)
KLRD1	ENSG00000134539	protein_coding	+	chr12:10378656-10469850	7.84377	2.88328	2.72044	1.44384	0.01615	0.240774	up	3824	CD94	MIM:602894|HGNC:HGNC:6378|Ensembl:ENSG00000134539|HPRD:04204	12	12p13	killer cell lectin like receptor D1	hsa04612(Antigen processing and presentation)//hsa04650(Natural killer cell mediated cytotoxicity)//hsa05332(Graft-versus-host disease)	GO:0009897(external side of plasma membrane)//GO:0016021(integral component of membrane)//GO:0005886(plasma membrane)//GO:0043235(receptor complex)	GO:0023024(MHC class I protein complex binding)//GO:0023030(MHC class Ib protein binding, via antigen binding groove)//GO:0030246(carbohydrate binding)//GO:1990405(protein antigen binding)//GO:0004888(transmembrane signaling receptor activity)//GO:0005515(protein binding)	GO:0050776(regulation of immune response)//GO:0007166(cell surface receptor signaling pathway)//GO:0045087(innate immune response)//GO:0002228(natural killer cell mediated immunity)
FHOD3	ENSG00000134775	protein_coding	+	chr18:33877676-34812135	8.70313	0.998314	8.71784	3.12397	0.02185	0.279033	up	80206	FHOS2|Formactin2	MIM:609691|HGNC:HGNC:26178|Ensembl:ENSG00000134775|HPRD:16894|Vega:OTTHUMG00000182381	18	18q12	formin homology 2 domain containing 3		GO:0030018(Z disc)//GO:0005856(cytoskeleton)	GO:0005515(protein binding)//GO:0003779(actin binding)	GO:0055003(cardiac myofibril assembly)//GO:0007015(actin filament organization)//GO:0051639(actin filament network formation)//GO:0030837(negative regulation of actin filament polymerization)
APLNR	ENSG00000134817	protein_coding	-	chr11:57001050-57004709	10.553	4.6382	2.27523	1.18601	0.0142	0.225067	up	187	AGTRL1|APJ|APJR|HG11	MIM:600052|HGNC:HGNC:339|Ensembl:ENSG00000134817|HPRD:02503|Vega:OTTHUMG00000167021	11	11q12	apelin receptor	hsa04080(Neuroactive ligand-receptor interaction)	GO:0005886(plasma membrane)//GO:0005887(integral component of plasma membrane)	GO:0004872(receptor activity)//GO:0004930(G-protein coupled receptor activity)	GO:0007507(heart development)//GO:0050878(regulation of body fluid levels)//GO:0007186(G-protein coupled receptor signaling pathway)//GO:0007369(gastrulation)
ARHGAP32	ENSG00000134909	protein_coding	-	chr11:128834954-129149219	5.72966	3.13727	1.82632	0.868941	0.04155	0.376456	up	9743	GC-GAP|GRIT|PX-RICS|RICS|p200RhoGAP|p250GAP	MIM:608541|HGNC:HGNC:17399|Ensembl:ENSG00000134909|HPRD:12257|Vega:OTTHUMG00000165774	11	11q24.3	Rho GTPase activating protein 32		GO:0045211(postsynaptic membrane)//GO:0005938(cell cortex)//GO:0010008(endosome membrane)//GO:0015629(actin cytoskeleton)//GO:0005789(endoplasmic reticulum membrane)//GO:0005829(cytosol)//GO:0014069(postsynaptic density)//GO:0030054(cell junction)//GO:0000139(Golgi membrane)//GO:0043197(dendritic spine)	GO:0005096(GTPase activator activity)//GO:0005515(protein binding)//GO:0035091(phosphatidylinositol binding)	GO:0007165(signal transduction)//GO:0051056(regulation of small GTPase mediated signal transduction)//GO:0007264(small GTPase mediated signal transduction)//GO:0043547(positive regulation of GTPase activity)
[truncated: 738 more rows]

## Sheet: dn.Patient_vs_Control
Patient vs Control.down Fold Change: 1.5 p-value: 0.05 FPKM >= 0.1 in at least one group Column A: gene, the gene name. Column B: gene_id, the Ensembl gene identifier. Column C: biotype, protein_coding. Column D: strand, transcription direction. Column E: locus, genomic locus. chromosome: start-end. Column F ~ G, FPKM value of each group. Column H: fold change, fold change between two groups (inf…
Patient vs Control down-regulated genes
[truncated: 820 more rows]
