# Supplementary material for: Circular RNA profiles of osteoarthritic synovium
Source: Royal Society of Chemistry journal article supplement (doi:10.1039/d2mo00066k), 2022-03-31
Supplement: d2mo00066k8.xlsx [file d2mo00066k8.xlsx]

## Sheet: Sheet1
ID	adj.P.Val	P.Value	t	B	logFC	Gene.symbol	Gene.title
208592_s_at	0.209	0.00023857	4.55439	0.51982	2.29029	CD1E	CD1e molecule
207092_at	0.2733	0.00311823	3.40403	-1.60861	3.96906	LEP	leptin
1570051_at	0.305	0.0140609	2.71573	-2.86054	1.29251	RNF144A	ring finger protein 144A
222185_at	0.3095	0.0168811	2.62974	-3.01125	1.2059	PKNOX2	PBX/knotted 1 homeobox 2
214667_s_at	0.3165	0.0193104	2.566	-3.12179	1.12188	TP53I11	tumor protein p53 inducible protein 11
225510_at	0.2702	0.00269106	-3.47015	-1.48579	-0.951867	OAF	out at first homolog
1316_at	0.305	0.0152208	2.67854	-2.92595	0.770848	THRA	thyroid hormone receptor, alpha
209084_s_at	0.3373	0.0297293	-2.35809	-3.47433	-0.844705	RAB28	RAB28, member RAS oncogene family
204546_at	0.3746	0.0507486	-2.09146	-3.9049	-0.599514	KIAA0513	KIAA0513
215169_at	0.4306	0.0903683	-1.78826	-4.35762	-0.845916	SLC35E2B///SLC35E2	solute carrier family 35 member E2B///solute carrier family 35 member E2
228939_at	0.4565	0.113383	1.66313	-4.53084	0.968376	OAF	out at first homolog
243816_at	0.5009	0.154302	-1.48626	-4.76023	-0.568051	ZNF70	zinc finger protein 70
227003_at	0.541	0.196063	-1.34203	-4.93265	-0.421806	RAB28	RAB28, member RAS oncogene family
202806_at	0.5442	0.199105	-1.33253	-4.94353	-0.349352	DBN1	drebrin 1
207495_at	0.5455	0.200732	1.32749	-4.94927	0.844514	RAB28	RAB28, member RAS oncogene family
226010_at	0.5612	0.217008	1.2788	-5.00382	0.50066	SLC25A23	solute carrier family 25 member 23
226469_s_at	0.5948	0.253561	1.17899	-5.11038	0.570619	GGT7	gamma-glutamyltransferase 7
204100_at	0.5979	0.256715	1.17091	-5.1187	0.401979	THRA	thyroid hormone receptor, alpha
226471_at	0.6063	0.266508	1.14627	-5.14374	0.642971	GGT7	gamma-glutamyltransferase 7
220180_at	0.6424	0.310246	1.04375	-5.243	0.336867	CCDC68	coiled-coil domain containing 68
227282_at	0.6591	0.333453	0.993541	-5.28865	0.691264	PCDH19	protocadherin 19
234674_at	0.6634	0.338865	0.982188	-5.29869	0.431085	RAB28	RAB28, member RAS oncogene family
222171_s_at	0.6785	0.359683	-0.939649	-5.33542	-0.60214	PKNOX2	PBX/knotted 1 homeobox 2
209333_at	0.6814	0.363331	0.93237	-5.34155	0.407289	ULK1	unc-51 like autophagy activating kinase 1
234628_at	0.7107	0.404589	0.853259	-5.40547	0.354307	RAB28	RAB28, member RAS oncogene family
219046_s_at	0.7272	0.428462	0.809869	-5.43833	0.432075	PKNOX2	PBX/knotted 1 homeobox 2
228264_at	0.7317	0.435885	-0.79669	-5.44799	-0.28562	ACCS	1-aminocyclopropane-1-carboxylate synthase homolog (inactive)
226470_at	0.7476	0.458884	0.756725	-5.4764	0.505848	GGT7	gamma-glutamyltransferase 7
214883_at	0.7577	0.473952	-0.7312	-5.49384	-0.360727	THRA	thyroid hormone receptor, alpha
204040_at	0.7609	0.47954	-0.721858	-5.50008	-0.224788	RNF144A	ring finger protein 144A
217025_s_at	0.7689	0.491249	-0.702488	-5.51277	-0.22658	DBN1	drebrin 1
63305_at	0.7783	0.507556	0.675954	-5.52964	0.25355	PKNOX2	PBX/knotted 1 homeobox 2
220182_at	0.8258	0.595493	0.540355	-5.60615	0.259661	SLC25A23	solute carrier family 25 member 23
217122_s_at	0.843	0.627193	0.494019	-5.62852	0.122968	SLC35E2B///SLC35E2	solute carrier family 35 member E2B///solute carrier family 35 member E2
210198_s_at	0.8593	0.661611	0.444926	-5.6501	0.242325	PLP1	proteolipid protein 1
35846_at	0.8623	0.667743	0.436299	-5.65366	0.101694	THRA	thyroid hormone receptor, alpha
205382_s_at	0.8719	0.688432	0.407437	-5.66509	0.151616	CFD	complement factor D
220911_s_at	0.884	0.713482	0.372956	-5.67774	0.195986	NYNRIN	NYN domain and retroviral integrase containing
201348_at	0.8929	0.73072	0.349498	-5.68572	0.124104	GPX3	glutathione peroxidase 3
214091_s_at	0.9339	0.824693	0.224725	-5.71953	0.0888459	GPX3	glutathione peroxidase 3
1554578_at	0.9878	0.966546	-0.0425206	-5.74259	-0.0140887	ZNF70	zinc finger protein 70
1554440_at	0.988	0.968127	-0.0405102	-5.74267	-0.0297892	KIAA0513	KIAA0513
1558821_s_at	0.0623	2.29e-06	6.76473	4.16481	2.69034	LOC102723694	uncharacterized LOC102723694
214522_x_at	0.0623	2.52e-06	6.71587	4.09328	3.05646	HIST1H3D///HIST1H2AD	histone cluster 1, H3d///histone cluster 1, H2ad
240352_at	0.0623	3.52e-06	6.54754	3.84355	2.73258	LOC101929609	uncharacterized LOC101929609
232966_at	0.0623	4.56e-06	6.41838	3.64845	1.88501	LPIN3	lipin 3
206330_s_at	0.0773	7.65e-06	6.16254	3.25322	2.60284	SHC3	SHC adaptor protein 3
216842_x_at	0.0773	8.59e-06	6.10606	3.16439	2.50918
1568843_at	0.0773	1.023e-05	6.02125	3.02995	2.25684	TTLL13P	tubulin tyrosine ligase like 13, pseudogene
1561009_at	0.0773	1.131e-05	5.97246	2.95205	2.34274	MAOB	monoamine oxidase B
220747_at	0.0874	1.439e-05	5.85673	2.76557	1.57212	LINC00652	long intergenic non-protein coding RNA 652
1560378_at	0.1327	2.477e-05	5.59797	2.34031	2.78371	GRIK1-AS2	GRIK1 antisense RNA 2
1558611_at	0.1327	2.719e-05	5.55382	2.26663	2.37847	MGC57346///CRHR1-IT1	ADP-ribosylation factor pseudogene///CRHR1 intronic transcript 1
231612_at	0.1327	2.94e-05	5.51711	2.20513	2.73422	CABS1	calcium binding protein, spermatid associated 1
217075_x_at	0.1327	3.277e-05	5.46606	2.11923	2.70441	KMT2B	lysine methyltransferase 2B
240447_at	0.1327	3.608e-05	5.42093	2.04292	2.89522	HYI-AS1	HYI antisense RNA 1
1565583_at	0.1327	3.642e-05	5.41656	2.03552	1.4487	ZSCAN5A	zinc finger and SCAN domain containing 5A
1565713_at	0.1344	4.237e-05	5.34592	1.91539	1.64857
233674_at	0.1344	4.875e-05	5.28061	1.80363	1.48434
243039_at	0.1344	4.975e-05	5.27118	1.78744	1.75719
215701_at	0.1344	5.257e-05	5.24553	1.74333	1.75802
1558041_a_at	0.1344	5.59e-05	-5.21702	1.69418	-2.57811	KIAA0895L	KIAA0895 like
1565684_at	0.1344	5.916e-05	5.19079	1.64885	2.25258	LOC400940	uncharacterized LOC400940
207049_at	0.1344	6.141e-05	5.17358	1.61904	1.74701	SCN8A	sodium voltage-gated channel alpha subunit 8
240468_at	0.1344	6.211e-05	5.16833	1.60995	1.76505
231849_at	0.1344	6.49e-05	5.14804	1.57475	2.26237	KRT80	keratin 80
226707_at	0.1344	6.642e-05	-5.1373	1.55609	-1.29874	NAPRT	nicotinate phosphoribosyltransferase
238233_at	0.1344	6.945e-05	5.11673	1.5203	1.91663
236714_at	0.1344	7.206e-05	5.09975	1.49073	2.60911
234935_at	0.1344	7.263e-05	5.09609	1.48435	2.06062	NDOR1	NADPH dependent diflavin oxidoreductase 1
1561665_at	0.1344	7.372e-05	5.08924	1.47239	2.94681	LOC100421171	thyroid hormone receptor interactor 11 pseudogene
204380_s_at	0.1344	7.378e-05	5.0889	1.4718	2.64995	FGFR3	fibroblast growth factor receptor 3
1559501_at	0.1388	7.871e-05	5.05913	1.41978	2.4005	CBR3-AS1	CBR3 antisense RNA 1
1562099_at	0.1464	8.572e-05	5.01992	1.35108	2.34095
236796_at	0.1748	0.00010649	4.92054	1.17598	1.79177
1553420_at	0.1748	0.0001087	4.91116	1.15937	3.29323	SATB2-AS1	SATB2 antisense RNA 1
206425_s_at	0.1773	0.00011584	4.88208	1.10784	1.71025	TRPC3	transient receptor potential cation channel subfamily C member 3
1557009_a_at	0.1773	0.00012172	4.85952	1.06779	3.05917	LOC340107	uncharacterized LOC340107
240726_at	0.1773	0.00012932	4.83188	1.01864	2.22158
234867_at	0.1773	0.00013014	4.82902	1.01354	1.60733
220253_s_at	0.1773	0.00013066	-4.82721	1.01032	-1.62718	LRP12	LDL receptor related protein 12
230683_at	0.1773	0.00013093	-4.82625	1.0086	-2.31135	PPP4R1L	protein phosphatase 4 regulatory subunit 1 like (pseudogene)
214105_at	0.1773	0.00013296	4.81925	0.99614	2.72486	SOCS3	suppressor of cytokine signaling 3
208062_s_at	0.1961	0.00015069	4.76234	0.89449	2.66096	NRG2	neuregulin 2
214251_s_at	0.1968	0.00016034	4.73416	0.84403	1.69398	NUMA1	nuclear mitotic apparatus protein 1
224470_at	0.1968	0.00017027	-4.7069	0.7951	-2.05948	SEC22C	SEC22 homolog C, vesicle trafficking protein
206433_s_at	0.1968	0.0001704	4.70657	0.79451	1.71931	SPOCK3	sparc/osteonectin, cwcv and kazal-like domains proteoglycan (testican) 3
206294_at	0.1968	0.0001713	4.70415	0.79018	2.51945	HSD3B2	hydroxy-delta-5-steroid dehydrogenase, 3 beta- and steroid delta-isomerase 2
234115_s_at	0.1968	0.00017538	4.6935	0.77102	1.81009	ZNRD1	zinc ribbon domain containing 1
240714_at	0.1968	0.00017801	4.68676	0.7589	3.6222
222083_at	0.1968	0.00018182	4.67715	0.74162	3.30737	GLYAT	glycine-N-acyltransferase
229439_s_at	0.1968	0.00018203	4.67664	0.7407	1.49176	RBM47	RNA binding motif protein 47
236713_at	0.1968	0.00018362	4.67271	0.73362	2.39976
1554685_a_at	0.1993	0.0001896	4.65819	0.70748	1.31027	CEMIP	cell migration inducing hyaluronan binding protein
221209_s_at	0.2028	0.00019666	4.64165	0.67766	2.05725	OTOR	otoraplin
1561280_at	0.209	0.00020663	4.6193	0.63731	3.40177	LEMD1-AS1	LEMD1 antisense RNA 1
206391_at	0.209	0.00023521	-4.56079	0.53143	-3.26445	RARRES1	retinoic acid receptor responder 1
244821_at	0.209	0.00024202	4.54792	0.50809	2.4207
1570251_at	0.209	0.00024916	4.53481	0.4843	1.68328	HECTD1	HECT domain E3 ubiquitin protein ligase 1
243833_at	0.209	0.00025578	4.52298	0.46281	2.63017	UNC5A	unc-5 netrin receptor A
201286_at	0.209	0.00025675	-4.52128	0.45972	-2.88928	SDC1	syndecan 1
228265_at	0.209	0.00025764	4.51972	0.45688	1.56021
241912_at	0.209	0.00026037	-4.51497	0.44825	-1.46118	ZNF814	zinc finger protein 814
1557203_at	0.209	0.00026308	4.51031	0.43978	1.19826	PABPC1L2B///PABPC1L2A	poly(A) binding protein cytoplasmic 1 like 2B///poly(A) binding protein cytoplasmic 1 like 2A
202448_s_at	0.209	0.00026398	4.50877	0.43699	1.40551	ZER1	zyg-11 related cell cycle regulator
231413_at	0.209	0.00026469	4.50755	0.43477	2.17218
236669_at	0.209	0.00026885	4.50054	0.42201	2.18027	SDCBP2-AS1	SDCBP2 antisense RNA 1
243748_at	0.209	0.00027012	4.49841	0.41813	1.52995
238105_x_at	0.209	0.00027265	4.4942	0.41049	2.393	WNT7B	Wnt family member 7B
244337_at	0.209	0.00027536	4.48975	0.40238	1.85623
234245_at	0.209	0.00028129	4.48016	0.38492	1.64711
210295_at	0.209	0.000287	4.47112	0.36845	1.8006	MAGEA10	MAGE family member A10
233937_at	0.209	0.00028791	4.46971	0.36587	2.13823	GGNBP2	gametogenetin binding protein 2
1560100_at	0.209	0.00028815	4.46933	0.36519	2.48781	DLX1	distal-less homeobox 1
224238_at	0.209	0.00028922	4.46765	0.36213	2.40788
211586_s_at	0.209	0.00029028	4.466	0.35912	2.077	ATP2B2	ATPase plasma membrane Ca2+ transporting 2
1558653_at	0.209	0.00029446	4.45958	0.34742	2.69163	MLK7-AS1	MLK7 antisense RNA 1
236512_at	0.209	0.0002959	4.45739	0.34342	1.1203
1557571_at	0.209	0.00030305	4.44665	0.32383	3.19574	VPS13D	vacuolar protein sorting 13 homolog D
210440_s_at	0.209	0.00030324	4.44636	0.32329	1.88035	CDC14A	cell division cycle 14A
240542_at	0.209	0.00030582	4.44256	0.31637	1.31571
237075_at	0.2156	0.00032088	-4.42094	0.27689	-2.14675	LOC101060091	uncharacterized LOC101060091
1562287_at	0.2156	0.00032342	4.4174	0.27042	2.74788	SNTG1	syntrophin gamma 1
238685_at	0.2165	0.00032868	4.41015	0.25718	2.16357	STXBP5-AS1	STXBP5 antisense RNA 1
233155_at	0.2184	0.00033787	4.39776	0.23451	2.56851	UPP2	uridine phosphorylase 2
1554262_s_at	0.2184	0.00033961	-4.39545	0.23029	-1.7279	KLHL29	kelch like family member 29
200649_at	0.2267	0.00036573	-4.36219	0.16938	-1.25922	NUCB1	nucleobindin 1
216940_x_at	0.2267	0.00037063	4.35622	0.15845	2.10755	YBX1	Y-box binding protein 1
221372_s_at	0.2267	0.00037757	4.34789	0.14317	2.55296	P2RX2	purinergic receptor P2X 2
230500_at	0.2267	0.00038418	4.3401	0.1289	1.51851	PDE7A	phosphodiesterase 7A
1566427_at	0.2267	0.00038647	4.33744	0.12401	2.44775	LOC102725420///LOC102724888	uncharacterized LOC102725420///uncharacterized LOC102724888
1556247_a_at	0.2267	0.00038913	4.33436	0.11837	1.99993	LOC100506271	uncharacterized LOC100506271
207756_at	0.2267	0.00038954	4.3339	0.11751	2.06143
217669_s_at	0.2267	0.00039573	4.32682	0.10453	2.19407	AKAP6	A-kinase anchoring protein 6
213943_at	0.2267	0.0003997	-4.32235	0.09631	-1.86421	TWIST1	twist family bHLH transcription factor 1
231217_at	0.2267	0.00041613	4.30429	0.06314	1.62076	SLC13A3	solute carrier family 13 member 3
231278_at	0.2267	0.00041876	4.30147	0.05796	1.63139	LOC101927503	uncharacterized LOC101927503
214360_at	0.2267	0.00042096	4.29912	0.05364	2.07216	SMARCA4	SWI/SNF related, matrix associated, actin dependent regulator of chromatin, subfamily a, member 4
236307_at	0.2267	0.00042433	4.29554	0.04707	2.48903
231313_at	0.2267	0.00043109	-4.28846	0.03405	-1.95775	FLJ27354	uncharacterized LOC400761
223848_at	0.2267	0.00043246	4.28704	0.03144	3.09303	LOC100129198	PRO2866
228044_at	0.2267	0.00043268	-4.28681	0.03101	-1.23258	SERP2	stress-associated endoplasmic reticulum protein family member 2
228683_s_at	0.2267	0.00043484	4.28458	0.02691	1.30618	KCTD15	potassium channel tetramerization domain containing 15
203000_at	0.2267	0.00043518	-4.28424	0.02628	-2.9221	STMN2	stathmin 2
210703_at	0.2267	0.00043578	4.28361	0.02514	1.50712
215248_at	0.2267	0.00043936	4.27995	0.0184	1.52264	GRB10	growth factor receptor bound protein 10
231940_at	0.2267	0.0004431	-4.27615	0.01141	-0.876059	ZNF529	zinc finger protein 529
228065_at	0.2267	0.00044568	-4.27355	0.00662	-2.154	BCL9L	B-cell CLL/lymphoma 9-like
219745_at	0.2267	0.00045836	-4.26098	-0.01651	-1.89348	MFSD13A	major facilitator superfamily domain containing 13A
234542_at	0.2267	0.0004598	4.25958	-0.01908	2.67264	ARHGEF12	Rho guanine nucleotide exchange factor 12
242803_at	0.2267	0.00046478	4.25476	-0.02796	1.46087
207866_at	0.2267	0.00047238	4.2475	-0.04134	2.5125	BMP8A	bone morphogenetic protein 8a
232250_at	0.2267	0.00047467	4.24533	-0.04532	2.60019	KIAA1257	KIAA1257
1570335_at	0.2267	0.00047968	4.24063	-0.05398	2.08264
1564590_a_at	0.2267	0.00048458	4.23608	-0.06238	2.11269	OFCC1	orofacial cleft 1 candidate 1
227434_at	0.2267	0.00048695	4.2339	-0.06639	2.09104	WBSCR17	Williams-Beuren syndrome chromosome region 17
208356_x_at	0.2267	0.00049515	4.22642	-0.08017	1.87799	GH1///CSHL1///CSH1	growth hormone 1///chorionic somatomammotropin hormone like 1///chorionic somatomammotropin hormone 1
239731_at	0.2267	0.00049572	4.22591	-0.08112	1.32475
236472_at	0.2267	0.00050226	4.22004	-0.09194	1.20805
1554050_at	0.2267	0.0005041	4.2184	-0.09496	2.32034	SMPDL3B	sphingomyelin phosphodiesterase acid like 3B
1556389_at	0.2267	0.00051291	-4.21066	-0.10924	-1.78626	CNPY3	canopy FGF signaling regulator 3
217817_at	0.2267	0.00052537	-4.19992	-0.12906	-1.29006	ARPC4	actin related protein 2/3 complex subunit 4
201289_at	0.2267	0.00052625	-4.19917	-0.13044	-2.08547	CYR61	cysteine rich angiogenic inducer 61
230582_at	0.2267	0.00053176	4.19451	-0.13904	2.04229	HECA	hdc homolog, cell cycle regulator
1554475_a_at	0.2267	0.00053717	4.18998	-0.1474	2.0373	C19orf47	chromosome 19 open reading frame 47
233167_at	0.2267	0.00053993	-4.18769	-0.15164	-2.50064	SELO	selenoprotein O
234329_at	0.2267	0.0005412	4.18664	-0.15358	2.27154	CLIC5	chloride intracellular channel 5
219215_s_at	0.2267	0.00054641	-4.18236	-0.16148	-1.87919	SLC39A4	solute carrier family 39 member 4
1560576_at	0.2267	0.00055143	4.17826	-0.16904	2.27765	LOC101928845	uncharacterized LOC101928845
231740_at	0.2267	0.00055551	4.17497	-0.17513	2.19494	KCNJ11	potassium voltage-gated channel subfamily J member 11
217636_at	0.2267	0.00055969	4.17161	-0.18132	1.91123	POLG	DNA polymerase gamma, catalytic subunit
234064_at	0.2267	0.00056046	4.171	-0.18246	2.19907
237656_at	0.2267	0.00056312	4.16888	-0.18636	3.1762	WWC2	WW and C2 domain containing 2
223355_at	0.2267	0.0005662	-4.16645	-0.19087	-1.30905	ALG1	ALG1, chitobiosyldiphosphodolichol beta-mannosyltransferase
220246_at	0.2267	0.00057713	-4.1579	-0.20667	-2.36165	CAMK1D	calcium/calmodulin dependent protein kinase ID
217338_at	0.2267	0.00057857	4.15679	-0.20872	2.24662	KRT19P2	keratin 19 pseudogene 2
1562865_at	0.2267	0.00058077	4.15508	-0.21187	2.19838
1554908_at	0.2267	0.00058481	4.15199	-0.21759	2.22212	HYDIN	HYDIN, axonemal central pair apparatus protein
224214_at	0.2267	0.00058673	4.15052	-0.22031	2.22311
206901_at	0.2267	0.00059057	4.14761	-0.22569	2.29192	C19orf57	chromosome 19 open reading frame 57
205517_at	0.2267	0.00059136	4.14701	-0.2268	2.446	GATA4	GATA binding protein 4
240251_at	0.2267	0.00060129	4.13956	-0.24057	1.95299	IFT80	intraflagellar transport 80
233324_at	0.2267	0.00060141	4.13948	-0.24073	1.55135	TRERF1	transcriptional regulating factor 1
1553519_at	0.2267	0.00060865	4.13413	-0.25061	2.12253	LINC00314	long intergenic non-protein coding RNA 314
238581_at	0.2267	0.00061444	-4.1299	-0.25845	-1.74772	GBP5	guanylate binding protein 5
243074_at	0.2267	0.00063572	4.11468	-0.2866	0.976696
1561683_at	0.2267	0.0006359	4.11456	-0.28684	1.71799
210239_at	0.2267	0.00063962	-4.11195	-0.29166	-2.21616	IRX5	iroquois homeobox 5
208006_at	0.2267	0.00064017	4.11157	-0.29237	1.92886	FOXI1	forkhead box I1
219129_s_at	0.2267	0.00064205	-4.11025	-0.2948	-0.929083	SAP30L	SAP30 like
211688_x_at	0.2267	0.00065469	4.10154	-0.31093	1.74507	KIR3DL2///KIR3DL1	killer cell immunoglobulin like receptor, three Ig domains and long cytoplasmic tail 2///killer cell immunoglobulin like receptor, three Ig domains and long cytoplasmic tail 1
1567273_at	0.2267	0.00065815	4.09919	-0.31529	1.84379	OR2K2	olfactory receptor family 2 subfamily K member 2
215021_s_at	0.2267	0.0006621	4.09652	-0.32024	1.79855	NRXN3	neurexin 3
1562253_at	0.2267	0.00066643	4.09361	-0.32562	2.09403	SLC7A11-AS1	SLC7A11 antisense RNA 1
235601_at	0.2267	0.00066846	4.09225	-0.32815	1.05681
213957_s_at	0.2267	0.00067468	4.08811	-0.33581	1.56671	CEP350	centrosomal protein 350
1556192_x_at	0.2267	0.00067586	4.08733	-0.33726	2.30825
238590_x_at	0.2267	0.00067955	-4.0849	-0.34175	-1.55705	TMEM107	transmembrane protein 107
222708_s_at	0.2267	0.00068099	4.08395	-0.34351	1.19224	STX17	syntaxin 17
224051_at	0.2267	0.00068306	4.0826	-0.34602	2.1395
217070_at	0.2267	0.00068595	4.08071	-0.34951	1.72181	MTHFR	methylenetetrahydrofolate reductase (NAD(P)H)
204389_at	0.2267	0.00068601	4.08067	-0.34959	1.03811	MAOA	monoamine oxidase A
224329_s_at	0.2267	0.00068696	4.08006	-0.35073	1.71814	CNFN	cornifelin
213184_at	0.2267	0.00069441	-4.07524	-0.35966	-0.905259	SENP5	SUMO1/sentrin specific peptidase 5
1563188_at	0.2267	0.00070079	4.07115	-0.36723	2.80153	LOC102723448	uncharacterized LOC102723448
223861_at	0.2267	0.00070286	-4.06984	-0.36967	-2.42885	HORMAD1	HORMA domain containing 1
242269_at	0.2267	0.00070937	4.06572	-0.3773	1.67216	LINC00982	long intergenic non-protein coding RNA 982
244651_at	0.2267	0.00071171	4.06425	-0.38003	2.09974
202081_at	0.2267	0.00071252	-4.06374	-0.38097	-1.73281	IER2	immediate early response 2
238208_at	0.2267	0.00071446	4.06253	-0.38323	1.57943
218381_s_at	0.2267	0.00071456	-4.06247	-0.38333	-0.782544	U2AF2	U2 small nuclear RNA auxiliary factor 2
222534_s_at	0.2267	0.0007169	4.06101	-0.38604	2.46308	INF2	inverted formin, FH2 and WH2 domain containing
239771_at	0.2267	0.00072105	4.05843	-0.39083	1.0571	CAND1	cullin associated and neddylation dissociated 1
229205_at	0.2267	0.00072536	-4.05577	-0.39575	-1.81624	ZNF793-AS1	ZNF793 antisense RNA 1 (head to head)
241903_at	0.2267	0.00073369	4.05067	-0.40521	1.62199
215943_at	0.2267	0.00073557	4.04952	-0.40733	2.24115	KIAA1661	KIAA1661 protein
241271_at	0.2267	0.00073657	4.04892	-0.40846	2.16704
232527_at	0.2267	0.00074	4.04684	-0.41231	1.11798	PSMD6-AS2	PSMD6 antisense RNA 2
208247_at	0.2267	0.00074441	4.04419	-0.41723	1.85108	ERC2-IT1	ERC2 intronic transcript 1
237949_at	0.2267	0.00074445	4.04417	-0.41727	2.36617
214614_at	0.2267	0.0007527	4.03925	-0.4264	2.03938	MNX1	motor neuron and pancreas homeobox 1
240704_at	0.2267	0.00075279	4.03919	-0.4265	2.21915
232823_at	0.2267	0.0007549	4.03794	-0.42881	1.58629
214954_at	0.227	0.00075986	-4.03502	-0.43424	-1.34192	SUSD5	sushi domain containing 5
216107_at	0.2273	0.00077795	4.02452	-0.45373	1.90626	LOC100129503	uncharacterized LOC100129503
236536_at	0.2273	0.00077997	4.02336	-0.45588	1.35368	GALNT13	polypeptide N-acetylgalactosaminyltransferase 13
219776_s_at	0.2273	0.00079082	4.01719	-0.46733	2.31345
241257_at	0.2273	0.00080684	4.00824	-0.48395	2.3893
233139_at	0.2273	0.00080779	4.00772	-0.48492	2.91237
1562630_at	0.2273	0.00080817	4.00751	-0.48531	1.34994	LOC101928651	uncharacterized LOC101928651
213177_at	0.2273	0.00081	4.0065	-0.48718	1.67311	MAPK8IP3	mitogen-activated protein kinase 8 interacting protein 3
233471_at	0.2273	0.00081133	4.00576	-0.48854	1.91533	PTPN5	protein tyrosine phosphatase, non-receptor type 5
233365_at	0.2273	0.00081319	4.00474	-0.49044	1.87037
240495_at	0.2273	0.000815	4.00375	-0.49228	1.28998
216837_at	0.2273	0.00082281	3.99949	-0.50019	1.80108	EPHA5	EPH receptor A5
211046_at	0.2273	0.0008242	3.99874	-0.50158	2.53068	KCNH6	potassium voltage-gated channel subfamily H member 6
208606_s_at	0.2273	0.00082457	3.99854	-0.50196	1.24871	WNT4	Wnt family member 4
242774_at	0.2273	0.00082574	3.9979	-0.50314	1.58819	SYNE2	spectrin repeat containing nuclear envelope protein 2
1561890_at	0.2273	0.00082676	3.99735	-0.50416	1.98554	C10orf128	chromosome 10 open reading frame 128
210291_s_at	0.2273	0.00083637	3.9922	-0.51374	1.59207	ZNF174	zinc finger protein 174
206517_at	0.2273	0.00083651	3.99212	-0.51388	1.06353	CDH16	cadherin 16
1570021_at	0.2273	0.00083983	3.99035	-0.51716	1.93286
238238_at	0.2273	0.00084394	3.98818	-0.52121	2.4576
1563679_at	0.2273	0.00084403	3.98813	-0.5213	2.44166	LINC01104	long intergenic non-protein coding RNA 1104
243145_at	0.2289	0.00085775	3.98093	-0.53467	1.45075
1563414_at	0.2289	0.00085842	3.98058	-0.53532	1.9907
207452_s_at	0.2336	0.00089068	3.96412	-0.5659	2.09453	CNTN5	contactin 5
211592_s_at	0.2336	0.00089895	-3.96	-0.57357	-1.20611	CACNA1C	calcium voltage-gated channel subunit alpha1 C
240745_at	0.2336	0.00091185	3.95364	-0.58539	2.60212	LOC101927760	uncharacterized LOC101927760
220043_s_at	0.2336	0.00091423	3.95248	-0.58755	1.63236	MELTF	melanotransferrin
239601_at	0.2336	0.00091461	3.95229	-0.5879	0.969744	TPGS2	tubulin polyglutamylase complex subunit 2
221171_at	0.2336	0.0009157	3.95176	-0.58889	1.74425	CCDC30	coiled-coil domain containing 30
218661_at	0.2336	0.00091857	-3.95036	-0.59148	-0.911413	NAA60	N(alpha)-acetyltransferase 60, NatF catalytic subunit
217927_at	0.2336	0.00091867	-3.95032	-0.59156	-0.915536	SPCS1	signal peptidase complex subunit 1
237506_at	0.2336	0.00092056	3.9494	-0.59328	2.64695	TMEM177	transmembrane protein 177
237299_at	0.2336	0.00092732	-3.94613	-0.59934	-1.46637	NARF	nuclear prelamin A recognition factor
234758_at	0.2336	0.00092776	3.94592	-0.59973	1.44248
208859_s_at	0.2336	0.00093311	3.94336	-0.60451	1.41424	ATRX	ATRX, chromatin remodeler
241929_at	0.2336	0.00093986	3.94014	-0.61049	1.73149
209936_at	0.2336	0.0009414	3.93941	-0.61185	2.16116	RBM5	RNA binding motif protein 5
240866_at	0.2336	0.00094197	3.93914	-0.61235	1.33775
1566081_at	0.2336	0.00095107	3.93485	-0.62032	1.97875	DLEU7	deleted in lymphocytic leukemia, 7
242059_at	0.2336	0.00095389	3.93353	-0.62279	1.68787
1560888_x_at	0.2336	0.00095566	3.9327	-0.62432	1.25029
1565650_at	0.2336	0.00095711	3.93203	-0.62558	2.30632
234644_x_at	0.2389	0.00098319	3.92003	-0.64789	1.97792	TNFRSF10C	TNF receptor superfamily member 10c
1563480_at	0.2403	0.0009935	3.91538	-0.65654	2.43735
210090_at	0.2422	0.00100578	-3.9099	-0.66674	-1.90614	ARC	activity regulated cytoskeleton associated protein
1561257_at	0.243	0.00101749	3.90473	-0.67635	2.10344	LOC286083	uncharacterized LOC286083
241585_at	0.243	0.00101807	3.90448	-0.67683	2.58971	LRRC4C	leucine rich repeat containing 4C
235342_at	0.2434	0.00103214	3.89835	-0.68822	2.50117	SPOCK3	sparc/osteonectin, cwcv and kazal-like domains proteoglycan (testican) 3
212218_s_at	0.2434	0.00103943	3.89521	-0.69407	1.23094	FASN	fatty acid synthase
232895_s_at	0.2434	0.00104121	3.89445	-0.69549	2.01466	SEC14L2	SEC14 like lipid binding 2
1569569_x_at	0.2434	0.0010431	3.89364	-0.69699	1.59676
1561585_at	0.2434	0.00104829	3.89143	-0.70111	1.91506	RCBTB2	RCC1 and BTB domain containing protein 2
227668_at	0.2434	0.00105211	-3.8898	-0.70414	-1.42449	TEPSIN	TEPSIN, adaptor related protein complex 4 accessory protein
205069_s_at	0.2434	0.00105806	3.88729	-0.70881	1.62005	ARHGAP26	Rho GTPase activating protein 26
213840_s_at	0.2434	0.00106064	3.8862	-0.71084	1.40198	MRPS12	mitochondrial ribosomal protein S12
1564386_at	0.2434	0.00106278	3.8853	-0.71251	1.0734	TXNDC8	thioredoxin domain containing 8
219846_at	0.2434	0.00106511	3.88433	-0.71433	1.21711	GON4L	gon-4 like
218596_at	0.2434	0.00106841	-3.88294	-0.7169	-1.61723	TBC1D13	TBC1 domain family member 13
216205_s_at	0.2452	0.00108089	3.87776	-0.72654	1.16365	MFN2	mitofusin 2
1559916_a_at	0.2454	0.00108645	3.87547	-0.7308	1.42591
227789_at	0.2462	0.00109719	3.87109	-0.73898	2.07891
223376_s_at	0.2462	0.0010991	-3.87031	-0.74042	-0.821038	BRI3	brain protein I3
239716_at	0.2466	0.00111006	3.86588	-0.74866	1.04245
222069_s_at	0.2466	0.00111857	3.86247	-0.75501	1.69246	RIN3	Ras and Rab interactor 3
1565692_at	0.2466	0.00111963	-3.86205	-0.75579	-1.79346
1561429_a_at	0.2466	0.00112275	3.86081	-0.7581	1.70264	MAATS1	MYCBP associated and testis expressed 1
220788_s_at	0.2466	0.0011247	-3.86004	-0.75955	-1.75993	RNF31///IRF9	ring finger protein 31///interferon regulatory factor 9
222969_at	0.2466	0.00113168	3.85728	-0.76468	1.61498	B3GALT1	beta-1,3-galactosyltransferase 1
34260_at	0.2466	0.00114128	-3.85351	-0.7717	-1.71827	TELO2	telomere maintenance 2
201693_s_at	0.2466	0.00114612	-3.85162	-0.77522	-2.09976	EGR1	early growth response 1
209189_at	0.2466	0.00114701	-3.85128	-0.77586	-3.03069	FOS	Fos proto-oncogene, AP-1 transcription factor subunit
232545_at	0.2466	0.00114915	3.85044	-0.77741	1.04605	LRRC29	leucine rich repeat containing 29
227824_at	0.2466	0.00115048	3.84993	-0.77837	2.09404	PRKCB	protein kinase C beta
204928_s_at	0.2471	0.00115731	-3.84729	-0.78329	-1.1664	SLC10A3	solute carrier family 10 member 3
239088_at	0.2508	0.00117894	3.83902	-0.79868	1.88688
238582_at	0.2515	0.00118715	3.83593	-0.80444	1.79102	C21orf2	chromosome 21 open reading frame 2
206705_at	0.2522	0.00119473	3.83309	-0.80973	1.12423	TULP1	tubby like protein 1
216767_at	0.2525	0.00120379	3.82972	-0.81601	2.08089
206769_at	0.2525	0.00120782	3.82823	-0.81879	1.36239	TMSB4Y	thymosin beta 4, Y-linked
229477_at	0.2525	0.00121012	3.82738	-0.82037	2.39959	THRSP	thyroid hormone responsive
1565921_a_at	0.2536	0.00122142	3.82323	-0.82809	2.42429
1565837_at	0.2536	0.00122467	3.82204	-0.8303	3.0488	LOC100506411	uncharacterized LOC100506411
1556867_at	0.2539	0.00123082	3.81981	-0.83447	2.91211	LOC105372607	uncharacterized LOC105372607
216600_x_at	0.2539	0.00123557	3.81809	-0.83767	1.41152	ALDOB	aldolase, fructose-bisphosphate B
1565254_s_at	0.2548	0.0012456	3.81448	-0.84439	2.68521	ELL	elongation factor for RNA polymerase II
1559630_at	0.2548	0.00125561	3.81091	-0.85104	2.21397
242138_at	0.2548	0.00126647	-3.80707	-0.8582	-1.9623	DLX1	distal-less homeobox 1
1570328_s_at	0.2548	0.00127022	3.80575	-0.86066	1.57349	LINC01620	long intergenic non-protein coding RNA 1620
232721_at	0.2548	0.00127311	3.80474	-0.86255	2.89922	TRIM55	tripartite motif containing 55
1556283_s_at	0.2548	0.00127577	-3.80381	-0.86428	-1.07513	FGFR1OP2	FGFR1 oncogene partner 2
217410_at	0.2548	0.00128308	3.80126	-0.86903	2.01982	AGRN	agrin
230924_at	0.2548	0.00129015	3.79881	-0.8736	1.94709	TTLL6	tubulin tyrosine ligase like 6
238840_at	0.2548	0.00130062	3.7952	-0.88032	1.31264	LRRFIP1	LRR binding FLII interacting protein 1
1558826_at	0.2548	0.00130378	3.79411	-0.88234	2.18291	ZNF831	zinc finger protein 831
1556207_a_at	0.2548	0.00130624	3.79327	-0.8839	2.50617	LINC00408	long intergenic non-protein coding RNA 408
209116_x_at	0.2548	0.00130936	-3.79221	-0.88589	-2.85155	HBB	hemoglobin subunit beta
1569892_at	0.2548	0.00131737	3.78949	-0.89096	1.98954
239876_at	0.2548	0.00132171	3.78802	-0.89369	0.869032
231050_at	0.2548	0.00132543	3.78677	-0.89603	1.46144	HRASLS5	HRAS like suppressor family member 5
212179_at	0.2548	0.00132569	3.78668	-0.89619	0.858747	PNISR	PNN interacting serine and arginine rich protein
243462_s_at	0.2548	0.00133121	3.78483	-0.89965	0.934495
1553150_at	0.2548	0.00133125	3.78481	-0.89968	2.27902	KDM1B	lysine demethylase 1B
217339_x_at	0.2548	0.00133909	3.78219	-0.90456	1.57013	CTAG1A///CTAG1B	cancer/testis antigen 1A///cancer/testis antigen 1B
206722_s_at	0.2548	0.00134669	3.77967	-0.90926	1.98414	LPAR2	lysophosphatidic acid receptor 2
217232_x_at	0.2548	0.00135527	-3.77683	-0.91455	-2.80048	HBB	hemoglobin subunit beta
228876_at	0.2548	0.0013629	3.77433	-0.91921	1.84088	BAIAP2L2	BAI1 associated protein 2 like 2
207731_at	0.2548	0.00137142	3.77154	-0.9244	2.74844
1554469_at	0.2548	0.00137411	3.77067	-0.92603	1.17203	ZBTB44	zinc finger and BTB domain containing 44
1560745_at	0.2548	0.00137852	3.76924	-0.92869	1.23357
220868_s_at	0.2548	0.00138013	3.76872	-0.92966	2.20948	SLC7A10	solute carrier family 7 member 10
205730_s_at	0.2548	0.00139058	3.76535	-0.93594	1.13983	ABLIM3	actin binding LIM protein family member 3
213739_at	0.2548	0.00139716	3.76325	-0.93986	0.938874	LOC103344931	uncharacterized LOC103344931
1553148_a_at	0.2548	0.00139828	3.76289	-0.94053	1.01827	SNX13	sorting nexin 13
1563497_at	0.2548	0.00140012	3.7623	-0.94162	1.47325	USP25	ubiquitin specific peptidase 25
241106_at	0.2548	0.00140323	3.76131	-0.94347	1.13762
240548_at	0.2548	0.00141247	3.75838	-0.94893	1.60184
207421_at	0.2548	0.00143984	3.74982	-0.96489	2.0198	CA5A	carbonic anhydrase 5A
1555057_at	0.2548	0.00144285	3.74888	-0.96663	1.92752	NDUFS4	NADH:ubiquinone oxidoreductase subunit S4
74694_s_at	0.2548	0.00144605	-3.74789	-0.96848	-1.3484	RABEP2	rabaptin, RAB GTPase binding effector protein 2
209937_at	0.2548	0.00146312	3.74266	-0.97824	1.35777	TM4SF4	transmembrane 4 L six family member 4
243992_at	0.2548	0.00146619	3.74172	-0.97998	1.29408
206242_at	0.2548	0.00146754	3.74131	-0.98075	2.07063	TM4SF5	transmembrane 4 L six family member 5
215848_at	0.2548	0.00148011	3.7375	-0.98784	1.07002	SCAPER	S-phase cyclin A associated protein in the ER
215634_at	0.2548	0.00148819	3.73507	-0.99237	2.30281
40472_at	0.2548	0.00149002	-3.73452	-0.99339	-1.81613	LPCAT4	lysophosphatidylcholine acyltransferase 4
215928_at	0.2548	0.00149335	3.73353	-0.99526	1.10952
1561334_at	0.2548	0.00149648	3.73259	-0.997	1.07627	LOC285181	uncharacterized LOC285181
219746_at	0.2548	0.00151313	3.72765	-1.0062	1.37564	DPF3	double PHD fingers 3
201412_at	0.2548	0.00151478	-3.72717	-1.00711	-0.977367	LRP10	LDL receptor related protein 10
1554311_a_at	0.2548	0.00151825	3.72614	-1.00901	2.43104	SUPT6H	SPT6 homolog, histone chaperone
233754_x_at	0.2548	0.00152074	3.72541	-1.01038	1.0768	ZNF71	zinc finger protein 71
1553390_at	0.2548	0.00152722	3.72351	-1.01392	2.26037	ATG9B	autophagy related 9B
240450_at	0.2548	0.00153287	3.72187	-1.01699	1.67243
1569383_s_at	0.2548	0.00154328	3.71885	-1.02262	1.85324	ZFYVE28	zinc finger FYVE-type containing 28
239501_at	0.2548	0.00155677	3.71496	-1.02986	2.53629
226840_at	0.2548	0.00155837	-3.7145	-1.03072	-1.24245	H2AFY	H2A histone family member Y
236131_at	0.2548	0.00156259	3.71329	-1.03297	2.13204
240449_at	0.2548	0.00156932	-3.71137	-1.03654	-2.0919	ZNF341	zinc finger protein 341
216258_s_at	0.2548	0.00157456	3.70989	-1.03932	2.06295	SERPINB13	serpin family B member 13
1555731_a_at	0.2548	0.00157515	3.70972	-1.03963	3.10978	AP1S3	adaptor related protein complex 1 sigma 3 subunit
223278_at	0.2548	0.00158241	-3.70766	-1.04346	-3.78137	GJB2	gap junction protein beta 2
221420_at	0.2548	0.00159362	3.70451	-1.04933	2.25827
232818_at	0.2548	0.00159697	3.70358	-1.05108	1.21525
206309_at	0.2548	0.0015999	3.70276	-1.05261	1.58628	LECT1	leukocyte cell derived chemotaxin 1
217111_at	0.2548	0.0016045	3.70147	-1.055	1.38129	AMACR	alpha-methylacyl-CoA racemase
1556449_at	0.2548	0.0016059	3.70109	-1.05572	1.87681	TRAPPC12	trafficking protein particle complex 12
232500_at	0.2548	0.00160785	3.70054	-1.05673	1.08579	RALGAPA2	Ral GTPase activating protein catalytic alpha subunit 2
215337_at	0.2548	0.00161116	3.69963	-1.05844	2.07164	MED24	mediator complex subunit 24
227007_at	0.2548	0.00161135	-3.69957	-1.05854	-2.01239	TMCO4	transmembrane and coiled-coil domains 4
213956_at	0.2548	0.00161145	3.69955	-1.05859	1.33304	CEP350	centrosomal protein 350
1567855_at	0.2548	0.00161249	3.69926	-1.05913	2.26881	ZNF29P	zinc finger protein 29, pseudogene
241702_at	0.2548	0.00161643	-3.69817	-1.06116	-1.81293
222346_at	0.2548	0.00162071	3.69699	-1.06336	1.75918	LAMA1	laminin subunit alpha 1
238171_at	0.2548	0.00162729	3.69518	-1.06674	1.61908	SLC25A30	solute carrier family 25 member 30
221397_at	0.2548	0.00162992	3.69446	-1.06808	2.38087	TAS2R10	taste 2 receptor member 10
202768_at	0.2548	0.00163081	-3.69421	-1.06853	-3.87663	FOSB	FosB proto-oncogene, AP-1 transcription factor subunit
226299_at	0.2548	0.00164774	-3.6896	-1.07713	-1.33434	PKN3	protein kinase N3
216612_x_at	0.2548	0.00164844	3.68941	-1.07748	2.94144
241138_at	0.2548	0.0016517	3.68853	-1.07913	1.96132
235653_s_at	0.2548	0.00165269	3.68826	-1.07963	1.16824	THAP6	THAP domain containing 6
238077_at	0.2548	0.00165543	-3.68752	-1.081	-0.884771	KCTD6	potassium channel tetramerization domain containing 6
205608_s_at	0.2548	0.00165742	3.68698	-1.08201	1.78091	ANGPT1	angiopoietin 1
216938_x_at	0.2548	0.00166027	3.68622	-1.08344	1.48733	DRD2	dopamine receptor D2
233403_x_at	0.2548	0.00166113	3.68598	-1.08387	1.57184	TM6SF2	transmembrane 6 superfamily member 2
231839_at	0.2548	0.00166693	-3.68443	-1.08677	-0.719048	PDE12	phosphodiesterase 12
212220_at	0.2548	0.00168098	3.68068	-1.09376	1.55721	PSME4	proteasome activator subunit 4
1569182_at	0.2548	0.00168295	3.68016	-1.09473	1.86565
1562927_at	0.2548	0.00168346	3.68002	-1.09499	2.44208
1562752_at	0.2548	0.00168428	3.6798	-1.09539	2.7026
1570238_at	0.2548	0.00168748	3.67896	-1.09697	1.70406	ZNF527	zinc finger protein 527
1559706_at	0.2548	0.00168927	3.67848	-1.09785	2.41187	ARHGEF28	Rho guanine nucleotide exchange factor 28
241872_at	0.2548	0.00169443	3.67712	-1.10039	1.9924
1555225_at	0.2548	0.00169589	-3.67674	-1.10111	-1.34293	C1orf43	chromosome 1 open reading frame 43
204687_at	0.2548	0.00170742	3.67371	-1.10675	1.0304	PARM1	prostate androgen-regulated mucin-like protein 1
205249_at	0.2548	0.00170894	-3.67331	-1.10749	-1.91184	EGR2	early growth response 2
1568898_at	0.2548	0.00170897	3.6733	-1.1075	2.1241	LOC101928140	uncharacterized LOC101928140
1561387_a_at	0.2548	0.00171504	3.67172	-1.11046	1.69774	NXPE1	neurexophilin and PC-esterase domain family member 1
236184_at	0.2548	0.00173183	3.66737	-1.11857	1.09563
231465_at	0.2548	0.00173397	3.66682	-1.1196	2.03072
237027_at	0.2548	0.00174021	3.66521	-1.12258	1.97339	LSAMP-AS1	LSAMP antisense RNA 1
232929_at	0.2548	0.00174264	3.66459	-1.12375	0.903064	ZBTB20	zinc finger and BTB domain containing 20
235115_at	0.2548	0.00174928	3.66289	-1.12691	1.91379	PDE8B	phosphodiesterase 8B
1553344_at	0.2548	0.00175088	3.66248	-1.12768	2.41613	PCDH15	protocadherin related 15
240365_at	0.2548	0.00175925	3.66035	-1.13165	1.86404	MIR924HG	MIR924 host gene
206417_at	0.2548	0.00175985	3.6602	-1.13193	1.11519	CNGA1	cyclic nucleotide gated channel alpha 1
220531_at	0.2548	0.00176711	3.65836	-1.13536	2.2705
225541_at	0.2548	0.00177727	-3.6558	-1.14013	-1.36789	RPL22L1	ribosomal protein L22 like 1
227821_at	0.2548	0.0017785	-3.65549	-1.14071	-1.31309	LGI4	leucine rich repeat LGI family member 4
1563052_at	0.2548	0.001782	3.65461	-1.14235	1.56772
201923_at	0.2548	0.00178408	-3.65409	-1.14332	-1.14383	PRDX4	peroxiredoxin 4
205904_at	0.2548	0.0017961	-3.65109	-1.14891	-1.01749	MICA	MHC class I polypeptide-related sequence A
220776_at	0.2548	0.00179672	3.65093	-1.1492	1.11572	KCNJ14	potassium voltage-gated channel subfamily J member 14
239562_at	0.2548	0.00180215	3.64959	-1.15171	0.808133	MTHFD2L	methylenetetrahydrofolate dehydrogenase (NADP+ dependent) 2-like
1559651_at	0.2548	0.00180365	3.64922	-1.1524	1.85214	CSNK1A1P1	casein kinase 1 alpha 1 pseudogene 1
239377_at	0.2548	0.00180597	-3.64864	-1.15347	-0.852886	EIF1AD	eukaryotic translation initiation factor 1A domain containing
244085_at	0.2548	0.00181518	3.64637	-1.15771	1.15124	ZNF653	zinc finger protein 653
232820_s_at	0.2548	0.00181532	3.64633	-1.15777	2.2514	GTSF1L	gametocyte specific factor 1 like
232233_at	0.2548	0.0018173	3.64585	-1.15868	1.31394	SLC22A16	solute carrier family 22 member 16
232776_at	0.2548	0.00181733	3.64584	-1.1587	2.26369	PDZRN3	PDZ domain containing ring finger 3
238304_at	0.2548	0.00181765	3.64576	-1.15884	2.05093
207285_x_at	0.2548	0.00182261	3.64454	-1.16111	2.1622	CSHL1	chorionic somatomammotropin hormone like 1
222632_s_at	0.2548	0.00182687	-3.6435	-1.16305	-1.14074	LZTFL1	leucine zipper transcription factor like 1
242819_at	0.2548	0.0018279	3.64325	-1.16352	0.861885
234477_at	0.2548	0.00183065	3.64257	-1.16478	1.25539	IGHV4-31///IGHA1	immunoglobulin heavy variable 4-31///immunoglobulin heavy constant alpha 1
214673_s_at	0.2548	0.00183256	3.64211	-1.16564	1.68374	HUWE1	HECT, UBA and WWE domain containing 1, E3 ubiquitin protein ligase
210585_s_at	0.2548	0.00183411	3.64173	-1.16635	2.1285	TNPO2	transportin 2
236893_at	0.2548	0.00183758	3.64089	-1.16792	1.93043	HOXB-AS3	HOXB cluster antisense RNA 3
204586_at	0.2548	0.00184046	3.64019	-1.16922	1.47726	BSN	bassoon presynaptic cytomatrix protein
226149_at	0.2548	0.00184115	-3.64002	-1.16954	-1.49441	SNORA60///SNORA71E///SNHG11	small nucleolar RNA, H/ACA box 60///small nucleolar RNA, H/ACA box 71E///small nucleolar RNA host gene 11
210964_s_at	0.2548	0.00184274	3.63963	-1.17026	2.83095	GYG2	glycogenin 2
203162_s_at	0.2548	0.00185122	-3.63758	-1.17408	-0.811883	KATNB1	katanin regulatory subunit B1
38521_at	0.2548	0.00185496	3.63668	-1.17576	1.50584	CD22	CD22 molecule
1566658_at	0.2548	0.00185663	3.63628	-1.17651	2.48653	LOC100507654	uncharacterized LOC100507654
1567682_x_at	0.2548	0.00185825	3.63589	-1.17724	2.54817	SNORA74A	small nucleolar RNA, H/ACA box 74A
231662_at	0.2548	0.001865	3.63427	-1.18026	2.47909	ARG1	arginase 1
206824_at	0.2548	0.00186822	3.6335	-1.18169	2.69817	CES1P1	carboxylesterase 1 pseudogene 1
233462_at	0.2548	0.00187184	3.63263	-1.1833	1.95728	TBC1D28	TBC1 domain family member 28
1560527_at	0.2548	0.00187187	3.63262	-1.18332	1.64873	NFE4	nuclear factor, erythroid 4
205319_at	0.2548	0.00187546	3.63177	-1.18492	1.58631	PSCA	prostate stem cell antigen
203456_at	0.2548	0.00188386	-3.62977	-1.18864	-1.20642	PRAF2	PRA1 domain family member 2
243742_at	0.2548	0.00190283	3.62529	-1.19698	2.35962	LOC100505797	myosin heavy chain IB-like
233808_at	0.2548	0.00190372	3.62508	-1.19737	1.95525
221972_s_at	0.2548	0.00190849	-3.62397	-1.19945	-1.07352	SDF4	stromal cell derived factor 4
233449_at	0.2548	0.00190999	3.62361	-1.20011	0.912693
1556599_s_at	0.2548	0.00191545	3.62234	-1.20249	3.38463	ARPP21	cAMP regulated phosphoprotein 21
227558_at	0.2548	0.00191907	-3.62149	-1.20406	-1.28086	CBX4	chromobox 4
224385_s_at	0.2548	0.00192157	3.62091	-1.20514	1.40828	MOV10L1	Mov10 RISC complex RNA helicase like 1
228206_at	0.2548	0.00192327	3.62052	-1.20588	1.86875	HS3ST4	heparan sulfate-glucosamine 3-sulfotransferase 4
1564881_at	0.2548	0.00193093	3.61874	-1.20919	1.94668	LINC01618	long intergenic non-protein coding RNA 1618
236423_at	0.2548	0.00193555	-3.61767	-1.21118	-1.53905
1556145_a_at	0.2548	0.0019358	3.61762	-1.21129	2.09056	LOC100131170	uncharacterized LOC100131170
218865_at	0.2548	0.00193752	3.61722	-1.21203	2.83991	MARC1	mitochondrial amidoxime reducing component 1
1569772_x_at	0.2548	0.00193778	3.61716	-1.21214	2.03092	LYPD4	LY6/PLAUR domain containing 4
207454_at	0.2548	0.00193906	3.61686	-1.21269	1.79356	GRIK3	glutamate ionotropic receptor kainate type subunit 3
1557598_at	0.2548	0.00194388	3.61575	-1.21476	2.32996	LOC101927870	uncharacterized LOC101927870
217704_x_at	0.2556	0.00195648	3.61286	-1.22014	1.32017
214591_at	0.2556	0.00196445	3.61105	-1.22353	2.09245	KLHL4	kelch like family member 4
1564707_x_at	0.2556	0.00196725	3.61041	-1.22471	2.65531	GLS2	glutaminase 2
229343_at	0.2556	0.00196939	3.60992	-1.22562	1.32611	GTSE1	G2 and S-phase expressed 1
1553506_at	0.2556	0.00197347	3.609	-1.22734	1.31855	CPO	carboxypeptidase O
207646_s_at	0.2556	0.00198281	3.60689	-1.23128	2.2707	CDY1B///CDY2B///CDY2A///CDY1	chromodomain Y-linked 1B///chromodomain Y-linked 2B///chromodomain Y-linked 2A///chromodomain Y-linked 1
1562998_at	0.2556	0.00199176	3.60487	-1.23503	2.2982
221541_at	0.2556	0.00199832	-3.6034	-1.23777	-1.1749	CRISPLD2	cysteine rich secretory protein LCCL domain containing 2
215768_at	0.2556	0.00199983	3.60307	-1.23839	1.60419
238093_at	0.2556	0.00200087	3.60283	-1.23883	1.0844	C9orf173-AS1	C9orf173 antisense RNA 1
214386_at	0.2556	0.00200103	3.6028	-1.23889	1.7554
230410_at	0.2557	0.00201198	3.60036	-1.24344	1.95823
235963_at	0.2557	0.00201898	3.5988	-1.24633	1.7311
231390_at	0.2557	0.00202213	3.59811	-1.24763	1.84693	LOC105377832	uncharacterized LOC105377832
231179_at	0.2557	0.00202591	3.59727	-1.24919	2.20948	IP6K3	inositol hexakisphosphate kinase 3
1560049_at	0.2557	0.00202629	3.59719	-1.24934	1.35869
217397_at	0.2557	0.00203023	3.59632	-1.25096	1.77981	YME1L1	YME1 like 1 ATPase
218006_s_at	0.2561	0.00203797	3.59462	-1.25413	1.1678	ZNF22	zinc finger protein 22
205233_s_at	0.2573	0.00205977	3.58986	-1.263	1.08457	PAFAH2	platelet activating factor acetylhydrolase 2
232035_at	0.2573	0.00206869	3.58793	-1.2666	1.38564	HIST1H4H	histone cluster 1, H4h
240055_at	0.2573	0.00207345	3.5869	-1.26851	2.48372
232973_at	0.2573	0.0020842	3.58459	-1.27282	1.61737	DOCK1	dedicator of cytokinesis 1
216959_x_at	0.2573	0.00209047	3.58324	-1.27532	2.54305	NRCAM	neuronal cell adhesion molecule
209156_s_at	0.2573	0.00209301	-3.5827	-1.27634	-1.71121	COL6A2	collagen type VI alpha 2 chain
239972_at	0.2573	0.00210273	3.58063	-1.28019	1.82891
225275_at	0.2573	0.00210413	-3.58033	-1.28075	-1.44737	EDIL3	EGF like repeats and discoidin domains 3
233470_at	0.2573	0.00210471	3.58021	-1.28098	2.15572	PTPN5	protein tyrosine phosphatase, non-receptor type 5
203953_s_at	0.2573	0.00210543	3.58005	-1.28127	1.94732	CLDN3	claudin 3
208221_s_at	0.2573	0.00211328	3.57839	-1.28437	2.17793	SLIT1	slit guidance ligand 1
1554707_at	0.2573	0.00212234	3.57648	-1.28793	1.19908	SPATA6L	spermatogenesis associated 6 like
216162_at	0.2573	0.00212475	3.57597	-1.28888	1.63373	SBNO1	strawberry notch homolog 1
207424_at	0.2573	0.00212866	3.57515	-1.29041	2.82573	MYF5	myogenic factor 5
208004_at	0.2573	0.0021293	3.57501	-1.29066	1.69541	OPRPN	opiorphin prepropeptide
204265_s_at	0.2573	0.00213293	3.57425	-1.29207	1.30884	GPSM3	G-protein signaling modulator 3
222799_at	0.2573	0.00214128	-3.5725	-1.29533	-1.63569	WDR91	WD repeat domain 91
212091_s_at	0.2573	0.00214702	-3.5713	-1.29756	-2.27113	COL6A1	collagen type VI alpha 1 chain
244468_at	0.2573	0.0021487	3.57095	-1.29821	2.47518
211338_at	0.2573	0.00215187	3.57029	-1.29944	2.45646	IFNA2	interferon alpha 2
224069_x_at	0.2573	0.00215259	3.57014	-1.29972	1.47375	P2RX2	purinergic receptor P2X 2
1558971_at	0.2573	0.00215347	3.56996	-1.30006	2.10978	THEMIS	thymocyte selection associated
218440_at	0.2573	0.00215648	3.56934	-1.30122	0.935098	MCCC1	methylcrotonoyl-CoA carboxylase 1
238131_at	0.2573	0.00216033	3.56854	-1.30271	1.85003	PHC2	polyhomeotic homolog 2
239884_at	0.2578	0.00216898	3.56675	-1.30604	2.10471	CADPS	calcium dependent secretion activator
233327_at	0.258	0.0021772	3.56506	-1.30919	2.21678	UBE3D	ubiquitin protein ligase E3D
213653_at	0.258	0.00218422	3.56362	-1.31188	0.858136	METTL3	methyltransferase like 3
1562984_at	0.258	0.0021872	3.56301	-1.31301	1.64212	LOC101928937	uncharacterized LOC101928937
238943_at	0.258	0.00219141	3.56215	-1.31461	2.14287	FIBCD1	fibrinogen C domain containing 1
223030_at	0.258	0.0022	3.56039	-1.31787	1.70881	TRAF7	TNF receptor associated factor 7
211924_s_at	0.258	0.00220362	-3.55966	-1.31924	-2.13937	PLAUR	plasminogen activator, urokinase receptor
233164_x_at	0.258	0.00220425	3.55953	-1.31948	1.19119	RHBDD1	rhomboid domain containing 1
211696_x_at	0.2585	0.00221311	-3.55774	-1.32282	-2.52188	HBB	hemoglobin subunit beta
235903_at	0.2586	0.0022184	3.55667	-1.32481	1.43974	ANKS6	ankyrin repeat and sterile alpha motif domain containing 6
217605_at	0.2586	0.00224062	3.55221	-1.33312	1.23848	USP27X	ubiquitin specific peptidase 27, X-linked
237001_at	0.2586	0.00225154	3.55003	-1.33717	1.40133
1554960_at	0.2586	0.00225412	3.54952	-1.33812	2.38931	CCDC190	coiled-coil domain containing 190
230355_at	0.2586	0.00225476	3.54939	-1.33836	0.952084	SEPT7P2	septin 7 pseudogene 2
224426_s_at	0.2586	0.00225519	3.54931	-1.33852	2.42322	ACTR3BP2///ACTR3BP5	ACTR3B pseudogene 2///ACTR3B pseudogene 5
221703_at	0.2586	0.00225573	3.5492	-1.33872	2.02612	BRIP1	BRCA1 interacting protein C-terminal helicase 1
224953_at	0.2586	0.0022564	-3.54907	-1.33896	-0.828763	YIPF5	Yip1 domain family member 5
1554159_a_at	0.2586	0.00225854	3.54864	-1.33976	1.75659	ZMYND11	zinc finger MYND-type containing 11
225942_at	0.2586	0.00227207	3.54597	-1.34473	1.02811	NLN	neurolysin
232657_at	0.2586	0.00227337	3.54571	-1.34521	1.80415
234798_x_at	0.2586	0.00227648	3.5451	-1.34635	1.93045
242764_at	0.2586	0.00228325	3.54377	-1.34882	2.723	DCHS2	dachsous cadherin-related 2
213932_x_at	0.2586	0.0022868	-3.54308	-1.35012	-1.28651	HLA-A	major histocompatibility complex, class I, A
208415_x_at	0.2586	0.00229071	-3.54231	-1.35154	-0.856233	ING1	inhibitor of growth family member 1
210739_x_at	0.2586	0.00229704	3.54108	-1.35384	1.25388	SLC4A4	solute carrier family 4 member 4
203541_s_at	0.2586	0.00230344	3.53983	-1.35616	1.80765	KLF9	Kruppel like factor 9
233117_at	0.2586	0.00230879	3.53879	-1.35809	1.6971	MAPT	microtubule associated protein tau
1555279_at	0.2586	0.00230907	-3.53874	-1.35819	-1.13228	ARMC8	armadillo repeat containing 8
223845_at	0.2586	0.00232076	3.53648	-1.3624	0.918504	VSIG10	V-set and immunoglobulin domain containing 10
235291_s_at	0.2586	0.00232214	-3.53621	-1.3629	-1.46267	FLJ32255	uncharacterized LOC643977
1553288_a_at	0.2586	0.00232484	3.53569	-1.36387	1.32468	NYAP1	neuronal tyrosine phosphorylated phosphoinositide-3-kinase adaptor 1
241462_at	0.2586	0.00232755	-3.53517	-1.36484	-1.71958
205720_at	0.2586	0.00232774	3.53513	-1.36491	1.97196	POMC	proopiomelanocortin
244609_at	0.2587	0.00233531	3.53368	-1.36761	2.08481	LOC102724487	uncharacterized LOC102724487
228784_at	0.2587	0.00233768	3.53323	-1.36846	1.4713	ST3GAL2	ST3 beta-galactoside alpha-2,3-sialyltransferase 2
242284_at	0.2595	0.00235268	3.53036	-1.37379	1.28815	LINC00466	long intergenic non-protein coding RNA 466
210165_at	0.2595	0.00235934	3.5291	-1.37614	1.14697	DNASE1	deoxyribonuclease 1
1556072_at	0.2595	0.00237079	3.52693	-1.38018	1.89968	LINC00528	long intergenic non-protein coding RNA 528
217101_at	0.2595	0.00237089	3.52691	-1.38021	2.02915	TTC39A	tetratricopeptide repeat domain 39A
224598_at	0.2595	0.00238181	-3.52485	-1.38404	-0.719421	MGAT4B	mannosyl (alpha-1,3-)-glycoprotein beta-1,4-N-acetylglucosaminyltransferase, isozyme B
231771_at	0.2595	0.00238311	-3.52461	-1.3845	-5.26576	GJB6	gap junction protein beta 6
1567319_at	0.2595	0.00238611	3.52404	-1.38555	2.21219
232067_at	0.2595	0.00238717	3.52384	-1.38592	1.51046	FAXC	failed axon connections homolog
243738_at	0.2595	0.00238809	3.52367	-1.38624	1.73666	NMNAT3	nicotinamide nucleotide adenylyltransferase 3
1568955_at	0.2597	0.00239561	-3.52227	-1.38886	-1.15044	SRGAP2C///SRGAP2B///SRGAP2	SLIT-ROBO Rho GTPase activating protein 2C///SLIT-ROBO Rho GTPase activating protein 2B///SLIT-ROBO Rho GTPase activating protein 2
220820_at	0.2597	0.0023994	3.52156	-1.39017	1.26225
232561_at	0.2609	0.00241903	3.51791	-1.39696	1.28523	ZNF771	zinc finger protein 771
241701_at	0.2609	0.0024219	3.51738	-1.39795	1.14865	ARHGAP21	Rho GTPase activating protein 21
201253_s_at	0.2609	0.00242435	-3.51692	-1.3988	-1.08871	CDIPT	CDP-diacylglycerol--inositol 3-phosphatidyltransferase
232671_at	0.2612	0.00243345	3.51525	-1.40192	1.87874	SLFNL1-AS1	SLFNL1 antisense RNA 1
208214_at	0.2612	0.00243946	3.51414	-1.40398	2.58438	ADRB1	adrenoceptor beta 1
219726_at	0.2612	0.00244127	3.51381	-1.40459	1.66175	NLGN3	neuroligin 3
1562999_x_at	0.2635	0.00246816	3.5089	-1.41372	2.66433
207401_at	0.2635	0.00247759	3.50719	-1.4169	1.25257	PROX1	prospero homeobox 1
238352_s_at	0.2635	0.00248316	3.50619	-1.41877	2.07
1553357_at	0.2635	0.00248508	3.50584	-1.41942	1.8837	LINC00889	long intergenic non-protein coding RNA 889
216530_at	0.2635	0.00248719	3.50546	-1.42013	1.98099
219685_at	0.2647	0.00250369	3.5025	-1.42563	1.12739	TMEM35A	transmembrane protein 35A
215869_at	0.2651	0.00251188	3.50104	-1.42836	1.57237
32032_at	0.2666	0.00253101	-3.49764	-1.43468	-1.00223	TSSK2///DGCR14	testis specific serine kinase 2///DiGeorge syndrome critical region gene 14
1562320_at	0.268	0.00255119	3.49408	-1.4413	2.37503	NAV2-AS5	NAV2 antisense RNA 5
212767_at	0.268	0.00255427	3.49354	-1.44231	1.07737	MTG1	mitochondrial ribosome associated GTPase 1
202284_s_at	0.268	0.00256267	-3.49206	-1.44504	-1.45334	CDKN1A	cyclin dependent kinase inhibitor 1A
219922_s_at	0.268	0.00256528	-3.49161	-1.44589	-1.45639	LTBP3	latent transforming growth factor beta binding protein 3
1563591_at	0.268	0.00258921	3.48745	-1.45363	1.87649	LOC101928269///LOC100506403///RUNX1	uncharacterized LOC101928269///uncharacterized LOC100506403///runt related transcription factor 1
223372_at	0.268	0.00259257	3.48687	-1.45471	1.74908	NUDT22	nudix hydrolase 22
213667_at	0.268	0.00259674	3.48615	-1.45605	1.30682	TMEM265///SRCAP	transmembrane protein 265///Snf2-related CREBBP activator protein
217058_at	0.268	0.00260115	3.48538	-1.45747	1.63829	GNAS	GNAS complex locus
1561083_at	0.268	0.00260149	3.48533	-1.45757	1.92181	LINC01254	long intergenic non-protein coding RNA 1254
243779_at	0.268	0.00260487	3.48475	-1.45866	1.9448	GALNT13	polypeptide N-acetylgalactosaminyltransferase 13
243819_at	0.268	0.00260508	3.48471	-1.45872	1.11435
230794_at	0.268	0.00261686	3.48269	-1.46249	2.28682	PELI2	pellino E3 ubiquitin protein ligase family member 2
207217_s_at	0.268	0.0026196	3.48222	-1.46336	1.69613	NOX1	NADPH oxidase 1
240125_at	0.268	0.00262386	3.48149	-1.46471	1.16731
221719_s_at	0.268	0.00262566	3.48118	-1.46528	1.63691	LZTS1	leucine zipper tumor suppressor 1
206827_s_at	0.268	0.00263286	3.47995	-1.46757	1.22668	TRPV6	transient receptor potential cation channel subfamily V member 6
244817_at	0.268	0.0026364	3.47935	-1.46869	2.53195	CARS2	cysteinyl-tRNA synthetase 2, mitochondrial (putative)
233874_at	0.268	0.00264224	3.47836	-1.47053	1.47611	SLAIN2	SLAIN motif family member 2
221130_s_at	0.268	0.00264538	3.47783	-1.47152	1.63176
1553238_a_at	0.268	0.00264574	3.47777	-1.47163	1.00774	HIPK4	homeodomain interacting protein kinase 4
242072_at	0.268	0.00265178	3.47674	-1.47353	2.21835
238117_at	0.268	0.00265262	-3.4766	-1.4738	-1.07496	PPOX	protoporphyrinogen oxidase
218840_s_at	0.2689	0.00266598	-3.47435	-1.47799	-1.90425	NADSYN1	NAD synthetase 1
214968_at	0.2702	0.00269772	3.46904	-1.48785	1.8829	DDX51	DEAD-box helicase 51
203398_s_at	0.2702	0.00270167	3.46839	-1.48907	1.92435	GALNT3	polypeptide N-acetylgalactosaminyltransferase 3
242485_at	0.2702	0.00270639	3.4676	-1.49053	1.8843
219249_s_at	0.2702	0.00270784	-3.46736	-1.49097	-1.9523	FKBP10	FK506 binding protein 10
226305_at	0.2702	0.00271402	-3.46634	-1.49287	-1.3875	LYNX1	Ly6/neurotoxin 1
237113_at	0.2702	0.00271495	3.46619	-1.49316	1.19527	LOC102725408	uncharacterized LOC102725408
241400_at	0.2702	0.00272039	3.46529	-1.49483	1.06494
243049_at	0.2702	0.00272324	3.46482	-1.4957	1.29715
202439_s_at	0.2703	0.00272895	-3.46388	-1.49745	-0.855683	IDS	iduronate 2-sulfatase
1564344_at	0.2704	0.00274088	3.46193	-1.50108	1.27783	ATP9B	ATPase phospholipid transporting 9B (putative)
1566825_at	0.2704	0.00275101	3.46027	-1.50416	0.71816
1562586_at	0.2704	0.0027549	3.45964	-1.50534	1.96197
211242_x_at	0.2704	0.00275646	3.45938	-1.50581	1.4835	KIR2DL4	killer cell immunoglobulin like receptor, two Ig domains and long cytoplasmic tail 4
205179_s_at	0.2704	0.00275772	3.45918	-1.50619	2.0841	ADAM8	ADAM metallopeptidase domain 8
244276_at	0.2704	0.00276013	3.45879	-1.50692	1.97716	KLB	klotho beta
206930_at	0.2708	0.00277416	3.45651	-1.51114	1.50975	GLYAT	glycine-N-acyltransferase
216544_at	0.2708	0.00277438	3.45648	-1.51121	2.15872	LOC100652931///RBMY2FP	RNA binding motif protein, Y-linked, family 1, member A1 pseudogene///RNA binding motif protein, Y-linked, family 2, member F pseudogene
233191_at	0.271	0.0027809	3.45542	-1.51317	0.956665	RUFY2	RUN and FYVE domain containing 2
243741_at	0.2716	0.00279221	3.4536	-1.51655	2.00684
237614_at	0.2721	0.00280762	3.45113	-1.52114	2.227	PHACTR2-AS1	PHACTR2 antisense RNA 1
1553185_at	0.2721	0.00281562	3.44986	-1.52351	2.04266	RASEF	RAS and EF-hand domain containing
207456_at	0.2721	0.00282488	3.44838	-1.52625	1.89933	HNF4G	hepatocyte nuclear factor 4 gamma
1560570_a_at	0.2721	0.00282807	3.44788	-1.52719	0.980748
241073_at	0.2721	0.00283213	3.44724	-1.52838	2.38135
1553425_at	0.2721	0.00283648	3.44655	-1.52966	1.77881	CFAP57	cilia and flagella associated protein 57
1558118_at	0.2721	0.00284434	3.44531	-1.53197	2.2955	LOC100287576///DGCR5	uncharacterized LOC100287576///DiGeorge syndrome critical region gene 5 (non-protein coding)
231647_s_at	0.2721	0.00284714	3.44486	-1.53279	2.65719	FCRL5	Fc receptor like 5
64486_at	0.2721	0.00285249	-3.44402	-1.53436	-0.830411	CORO1B	coronin 1B
234012_at	0.2721	0.0028538	3.44381	-1.53474	1.29839
230059_at	0.2721	0.00285474	3.44367	-1.53501	1.14879	DEAF1	DEAF1, transcription factor
1569132_s_at	0.2721	0.00285653	3.44339	-1.53554	1.54556	ARSK	arylsulfatase family member K
1570303_at	0.2725	0.00286629	3.44186	-1.53838	1.87239
242189_at	0.273	0.00287651	3.44026	-1.54135	2.43213
239597_at	0.2732	0.00289805	3.43691	-1.54756	1.09654
211599_x_at	0.2732	0.00290631	3.43563	-1.54994	1.06892	MET	MET proto-oncogene, receptor tyrosine kinase
231072_at	0.2732	0.00291581	3.43417	-1.55266	2.24796	MIDN	midnolin
1562100_at	0.2732	0.00292128	3.43333	-1.55422	1.48685
1564164_at	0.2732	0.00292337	3.43301	-1.55482	2.10381	DENND1B	DENN domain containing 1B
215914_at	0.2732	0.00292987	3.43201	-1.55667	1.47222
1563450_at	0.2732	0.00293193	3.43169	-1.55726	1.86323	DEFB107B///DEFB107A	defensin beta 107B///defensin beta 107A
231034_s_at	0.2732	0.00293463	3.43128	-1.55802	1.20609	NHSL1	NHS like 1
1568601_at	0.2732	0.00293629	3.43103	-1.55849	1.70311	GAD2	glutamate decarboxylase 2
234522_at	0.2732	0.00294134	3.43025	-1.55993	1.99695
AFFX-r2-Bs-phe-3_at	0.2732	0.00294357	3.42991	-1.56056	1.88746
237365_at	0.2732	0.0029548	3.42821	-1.56373	2.57849	ELOVL2-AS1	ELOVL2 antisense RNA 1
233489_at	0.2732	0.00296944	3.42599	-1.56785	1.14954	TMEM43	transmembrane protein 43
241975_at	0.2732	0.00298231	3.42405	-1.57146	2.0923	MIR100HG	mir-100-let-7a-2 cluster host gene
1569998_at	0.2732	0.00299085	3.42276	-1.57384	1.43622	MMD2	monocyte to macrophage differentiation associated 2
1559172_at	0.2732	0.00299203	3.42258	-1.57417	2.21355
220673_s_at	0.2732	0.0029939	3.4223	-1.57469	1.48756	PPP4R4	protein phosphatase 4 regulatory subunit 4
237759_at	0.2732	0.00300077	3.42127	-1.5766	1.02451	CD48	CD48 molecule
1561571_at	0.2732	0.00301069	3.41979	-1.57935	1.61839
1558869_at	0.2732	0.0030127	3.41949	-1.57991	2.24403
1560679_at	0.2732	0.00301513	3.41913	-1.58058	1.49048	LINC01127	long intergenic non-protein coding RNA 1127
203252_at	0.2732	0.00301697	-3.41886	-1.58109	-1.44121	CDK2AP2	cyclin dependent kinase 2 associated protein 2
207762_at	0.2732	0.0030187	3.4186	-1.58157	1.98366	LPAL2	lipoprotein(a) like 2, pseudogene
202312_s_at	0.2732	0.00301911	3.41854	-1.58168	1.60291	COL1A1	collagen type I alpha 1 chain
1559332_at	0.2732	0.00302213	3.41809	-1.58251	1.22273
1562747_at	0.2732	0.00302234	3.41806	-1.58257	1.60944	LOC101928101	uncharacterized LOC101928101
1563154_at	0.2732	0.00302314	3.41794	-1.58279	2.17979	LOC101927790	uncharacterized LOC101927790
225565_at	0.2732	0.00302604	3.41751	-1.58359	0.832451	CREB1	cAMP responsive element binding protein 1
243901_at	0.2732	0.00302745	3.4173	-1.58398	2.64677	ALDOB	aldolase, fructose-bisphosphate B
232032_x_at	0.2732	0.00302897	-3.41708	-1.5844	-1.20254	SDF4	stromal cell derived factor 4
232479_at	0.2733	0.00304743	3.41435	-1.58947	1.7192	FERMT1	fermitin family member 1
202367_at	0.2733	0.00304755	-3.41433	-1.5895	-1.399	CUX1	cut like homeobox 1
1568719_s_at	0.2733	0.00305062	3.41388	-1.59034	1.78265	SLC22A23	solute carrier family 22 member 23
232098_at	0.2733	0.00306886	3.4112	-1.59531	1.34987	DST	dystonin
222560_at	0.2733	0.00307446	3.41038	-1.59683	2.35813	LANCL2	LanC like 2
217771_at	0.2733	0.00308415	-3.40897	-1.59945	-2.11245	GOLM1	golgi membrane protein 1
208041_at	0.2733	0.00308431	3.40894	-1.59949	1.64483	GRK1	G protein-coupled receptor kinase 1
1563894_at	0.2733	0.00309189	3.40784	-1.60154	1.80365	LOC441178	uncharacterized LOC441178
206591_at	0.2733	0.00309691	3.40711	-1.60289	2.31528	RAG1	recombination activating gene 1
242950_x_at	0.2733	0.00309894	3.40682	-1.60344	1.383
239264_at	0.2733	0.00309947	3.40674	-1.60358	0.962323
201694_s_at	0.2733	0.00310302	-3.40623	-1.60454	-1.55048	EGR1	early growth response 1
237214_at	0.2733	0.00310673	3.40569	-1.60553	2.52189	TFRC	transferrin receptor
222073_at	0.2733	0.00312341	3.40328	-1.61	2.5144	COL4A3	collagen type IV alpha 3 chain
221366_at	0.2733	0.0031307	3.40224	-1.61194	1.81263	NKX6-1	NK6 homeobox 1
236703_at	0.2733	0.00313407	3.40175	-1.61284	1.0584
1554496_at	0.2733	0.00313462	3.40168	-1.61298	1.1069	RAD51B	RAD51 paralog B
242736_at	0.2733	0.00313563	3.40153	-1.61325	1.87464
242383_at	0.2733	0.00313668	3.40138	-1.61353	1.47657
1552742_at	0.2733	0.00314621	3.40002	-1.61606	2.2486	KCNH8	potassium voltage-gated channel subfamily H member 8
226952_at	0.2733	0.00315144	-3.39927	-1.61745	-0.999589	EAF1	ELL associated factor 1
217602_at	0.2733	0.00315263	-3.3991	-1.61776	-2.02664	LOC101060363///PPIA	peptidyl-prolyl cis-trans isomerase A pseudogene///peptidylprolyl isomerase A
1569805_at	0.2733	0.00315681	3.39851	-1.61886	1.77174	LOC101927274	uncharacterized LOC101927274
240034_at	0.2733	0.00315743	3.39842	-1.61903	1.92665
222071_s_at	0.2733	0.00316386	3.3975	-1.62072	1.10006	SLCO4C1	solute carrier organic anion transporter family member 4C1
1557534_at	0.2733	0.00316444	3.39742	-1.62087	2.16399	LOC339862	uncharacterized LOC339862
209295_at	0.2734	0.00317043	-3.39657	-1.62245	-1.15214	TNFRSF10B	TNF receptor superfamily member 10b
232327_at	0.2735	0.00317712	3.39562	-1.62421	2.12876	THSD7B	thrombospondin type 1 domain containing 7B
236942_at	0.2736	0.00319086	3.39369	-1.62781	1.43728	CCDC182	coiled-coil domain containing 182
214095_at	0.2736	0.0031916	-3.39358	-1.628	-1.4018	SHMT2	serine hydroxymethyltransferase 2
240850_at	0.2736	0.00319942	3.39248	-1.63004	1.64485
239516_at	0.2736	0.00320457	3.39176	-1.63138	1.13088
226964_at	0.2736	0.00320565	3.39161	-1.63166	0.97805	TTBK2	tau tubulin kinase 2
233604_at	0.2736	0.00320999	3.391	-1.63279	2.0971	FLJ22763	uncharacterized LOC401081
239160_at	0.2736	0.00321362	3.39049	-1.63373	2.07467
207079_s_at	0.2742	0.00322702	3.38862	-1.6372	0.759352	MED6	mediator complex subunit 6
232677_at	0.2742	0.00322995	3.38821	-1.63796	2.25684	SYT11	synaptotagmin 11
211306_s_at	0.2743	0.0032369	3.38725	-1.63975	1.70776	FCAR	Fc fragment of IgA receptor
204543_at	0.2744	0.00324215	3.38652	-1.6411	1.49594	RAPGEF1	Rap guanine nucleotide exchange factor 1
240953_at	0.2749	0.00325372	3.38492	-1.64407	2.10565
224530_s_at	0.2751	0.00326267	3.38368	-1.64636	1.79652	KCNIP4	potassium voltage-gated channel interacting protein 4
1555794_at	0.2751	0.00326842	3.38289	-1.64783	2.47742	ARL17B///ARL17A	ADP ribosylation factor like GTPase 17B///ADP ribosylation factor like GTPase 17A
207054_at	0.2751	0.00327601	3.38185	-1.64976	2.12519	IMPG1	interphotoreceptor matrix proteoglycan 1
232138_at	0.2751	0.00327711	3.3817	-1.65004	0.787333	MBNL2	muscleblind like splicing regulator 2
214303_x_at	0.2751	0.00328606	3.38047	-1.65232	1.51208	MUC5AC	mucin 5AC, oligomeric mucus/gel-forming
222412_s_at	0.2751	0.00330394	-3.37803	-1.65684	-0.872174	SSR3	signal sequence receptor subunit 3
236113_at	0.2751	0.00330529	-3.37785	-1.65718	-1.94073
210081_at	0.2751	0.00330559	3.37781	-1.65726	1.92544	AGER	advanced glycosylation end-product specific receptor
236427_at	0.2751	0.00331049	3.37714	-1.65849	1.29864
237662_at	0.2751	0.00331577	3.37643	-1.65982	1.73458	SPATA19	spermatogenesis associated 19
230043_at	0.2751	0.0033159	3.37641	-1.65985	1.15807	MUC20	mucin 20, cell surface associated
1569857_s_at	0.2751	0.00332596	3.37505	-1.66238	1.06338	TPP2	tripeptidyl peptidase 2
1564964_at	0.2751	0.00332812	3.37475	-1.66292	2.16615
209058_at	0.2751	0.00332941	-3.37458	-1.66324	-0.67817	EDF1	endothelial differentiation related factor 1
216793_x_at	0.2751	0.00333716	3.37353	-1.66518	1.81906	LOC100289518	immunoglobin superfamily member 21 pseudogene
204931_at	0.2751	0.00334008	3.37314	-1.66591	1.89618	TCF21	transcription factor 21
222679_s_at	0.2751	0.0033482	3.37205	-1.66793	0.924092	DCUN1D1	defective in cullin neddylation 1 domain containing 1
1561880_a_at	0.2751	0.00335081	-3.3717	-1.66858	-1.64692	SIGLEC16	sialic acid binding Ig like lectin 16 (gene/pseudogene)
217285_at	0.2751	0.00335615	3.37098	-1.66991	1.15502	TSSK2///DGCR14	testis specific serine kinase 2///DiGeorge syndrome critical region gene 14
223239_at	0.2751	0.00336368	-3.36997	-1.67178	-0.806091	GSKIP	GSK3B interacting protein
1556508_s_at	0.2751	0.00337644	3.36827	-1.67494	2.225	LINC01210	long intergenic non-protein coding RNA 1210
232029_at	0.2751	0.0033843	-3.36723	-1.67687	-1.68717	ZNF451	zinc finger protein 451
218717_s_at	0.2751	0.0033851	-3.36712	-1.67707	-1.72036	P3H2	prolyl 3-hydroxylase 2
238451_at	0.2751	0.00339695	3.36555	-1.67999	2.04533	MPP7	membrane palmitoylated protein 7
1556536_at	0.2751	0.00341891	3.36265	-1.68536	1.79897	LOC729224	uncharacterized LOC729224
241132_at	0.2751	0.00342058	3.36243	-1.68576	2.4299
219300_s_at	0.2751	0.00342139	3.36232	-1.68596	2.42399	CNTNAP2	contactin associated protein-like 2
225402_at	0.2751	0.00343232	-3.36089	-1.68862	-1.63047	TP53RK	TP53 regulating kinase
220493_at	0.2751	0.00343819	3.36012	-1.69004	1.73646	DMRT1	doublesex and mab-3 related transcription factor 1
231492_at	0.2751	0.00344125	3.35972	-1.69079	2.00526	LINC01523	long intergenic non-protein coding RNA 1523
1558822_at	0.2751	0.00344764	3.35888	-1.69233	0.917001
1565934_at	0.2751	0.00344792	3.35885	-1.6924	2.25135	ZGRF1	zinc finger GRF-type containing 1
234278_at	0.2751	0.00345753	3.3576	-1.69472	0.748982
209992_at	0.2751	0.00345925	3.35737	-1.69514	1.28477	PFKFB2	6-phosphofructo-2-kinase/fructose-2,6-biphosphatase 2
1554789_a_at	0.2751	0.00346321	3.35686	-1.69609	1.21148	PDE8B	phosphodiesterase 8B
240820_at	0.2751	0.00346733	3.35632	-1.69708	1.41664
241584_at	0.2751	0.00346856	3.35616	-1.69738	1.74319
236800_at	0.2751	0.00347385	3.35548	-1.69865	1.62004	UCMA	upper zone of growth plate and cartilage matrix associated
210524_x_at	0.2751	0.00347766	-3.35498	-1.69956	-1.43476
241590_at	0.2751	0.00348501	3.35403	-1.70132	1.99536
215379_x_at	0.2751	0.00348715	-3.35376	-1.70183	-3.01942	IGLV1-44	immunoglobulin lambda variable 1-44
213905_x_at	0.2751	0.00349905	-3.35222	-1.70467	-2.15801	BGN	biglycan
241947_at	0.2751	0.00350157	3.3519	-1.70527	1.8974	PCED1B-AS1	PCED1B antisense RNA 1
202971_s_at	0.2751	0.0035033	3.35168	-1.70569	1.09325	DYRK2	dual specificity tyrosine phosphorylation regulated kinase 2
229249_at	0.2751	0.00350381	-3.35161	-1.70581	-1.84148
1562916_at	0.2751	0.00351166	3.35061	-1.70767	2.26698	LINC00102	long intergenic non-protein coding RNA 102
240973_s_at	0.2751	0.0035142	3.35028	-1.70828	1.92402
218029_at	0.2751	0.00352273	-3.34919	-1.7103	-1.9215	FAM65A	family with sequence similarity 65 member A
244332_at	0.2751	0.00352541	3.34885	-1.71093	1.25298
218392_x_at	0.2751	0.00352834	-3.34847	-1.71162	-0.769825	SFXN1	sideroflexin 1
236816_at	0.2751	0.00354104	3.34686	-1.71462	1.06643	NAA25	N(alpha)-acetyltransferase 25, NatB auxiliary subunit
243424_at	0.2751	0.00354137	3.34681	-1.7147	1.14688
208435_s_at	0.2751	0.00354328	3.34657	-1.71514	1.37364	AQP6	aquaporin 6
205913_at	0.2751	0.00355109	3.34558	-1.71698	3.61042	PLIN1	perilipin 1
219205_at	0.2751	0.00355782	3.34473	-1.71856	0.809104	SRR	serine racemase
1556333_at	0.2751	0.00356435	3.3439	-1.72009	2.16775
1560979_a_at	0.2751	0.00357174	3.34297	-1.72181	1.84576
243974_at	0.2751	0.00358505	3.3413	-1.72491	1.41519
242354_at	0.2751	0.00359233	3.34038	-1.72661	1.84404
1559804_at	0.2751	0.0035933	3.34026	-1.72683	1.9632	LOC105375875	uncharacterized LOC105375875
241157_at	0.2751	0.00359619	3.3399	-1.7275	2.18021
230349_at	0.2751	0.00359776	3.3397	-1.72787	1.52734	XKRX	XK related, X-linked
218140_x_at	0.2751	0.00359817	-3.33965	-1.72796	-0.933145	SRPRB	SRP receptor beta subunit
229722_at	0.2751	0.00359827	3.33964	-1.72798	1.05352	LOC100270804	uncharacterized LOC100270804
204379_s_at	0.2751	0.00360757	-3.33848	-1.73014	-1.94057	FGFR3	fibroblast growth factor receptor 3
1567248_at	0.2751	0.0036206	3.33685	-1.73314	2.3204	OR9A1P	olfactory receptor family 9 subfamily A member 1 pseudogene
215800_at	0.2751	0.00364948	3.33328	-1.73976	1.24299	DUOX1	dual oxidase 1
236286_at	0.2751	0.00364993	3.33322	-1.73987	1.5353	PROCA1	protein interacting with cyclin A1
1566978_at	0.2751	0.00365917	3.33208	-1.74197	1.66607
224110_at	0.2751	0.00365985	3.332	-1.74213	2.23575	PRO1804	uncharacterized LOC100133319
211521_s_at	0.2751	0.00366234	3.33169	-1.7427	1.39358	CYTH4	cytohesin 4
233747_at	0.2751	0.00366772	3.33103	-1.74392	1.97329
221441_at	0.2751	0.00366858	3.33093	-1.74412	1.89056	GSC2	goosecoid homeobox 2
231299_at	0.2751	0.00367867	3.32969	-1.74641	1.39061	AGAP3	ArfGAP with GTPase domain, ankyrin repeat and PH domain 3
223727_at	0.2751	0.00368019	3.3295	-1.74675	1.31523	KCNIP2	potassium voltage-gated channel interacting protein 2
1555757_at	0.2751	0.00368893	3.32843	-1.74873	1.59847	C7orf34	chromosome 7 open reading frame 34
1562392_at	0.2751	0.00369344	3.32788	-1.74975	1.16661	MRPL23	mitochondrial ribosomal protein L23
239246_at	0.2751	0.00369363	3.32786	-1.74979	0.933324	FARP1	FERM, ARH/RhoGEF and pleckstrin domain protein 1
209044_x_at	0.2751	0.003699	-3.32721	-1.751	-0.939978	SF3B4	splicing factor 3b subunit 4
233385_x_at	0.2751	0.00369985	-3.3271	-1.75119	-1.6597	MIA-RAB4B///RAB4B	MIA-RAB4B readthrough (NMD candidate)///RAB4B, member RAS oncogene family
243062_at	0.2751	0.00370252	3.32678	-1.75179	2.29355	FLCN	folliculin
239903_at	0.2751	0.00370693	-3.32624	-1.75279	-2.04349	TPBG	trophoblast glycoprotein
1564215_at	0.2751	0.00370977	3.3259	-1.75342	1.87219
1556963_at	0.2751	0.00371133	3.32571	-1.75378	2.35381
233219_at	0.2751	0.00371153	3.32568	-1.75382	1.103
233641_s_at	0.2751	0.00371231	3.32559	-1.75399	1.84105	FAM167A	family with sequence similarity 167 member A
AFFX-PheX-3_at	0.2751	0.00372608	3.32392	-1.75708	1.63426
211209_x_at	0.2751	0.00373276	3.32312	-1.75857	1.62735	SH2D1A	SH2 domain containing 1A
232935_at	0.2751	0.00373381	3.32299	-1.75881	1.07858
1569690_at	0.2751	0.00373515	3.32283	-1.75911	1.07011	CCDC36	coiled-coil domain containing 36
1563906_at	0.2751	0.00373675	3.32263	-1.75946	1.9225	SOBP	sine oculis binding protein homolog
243425_at	0.2751	0.00374969	3.32108	-1.76235	1.29718	LOC101928557	uncharacterized LOC101928557
242591_at	0.2751	0.00376703	3.319	-1.76619	1.99135	DNAH1	dynein axonemal heavy chain 1
206372_at	0.2751	0.00377969	3.31749	-1.76899	2.95451	MYF6	myogenic factor 6
1563902_at	0.2751	0.00378267	3.31713	-1.76965	1.51565
218380_at	0.2751	0.00378309	-3.31708	-1.76974	-0.904772	LOC728392	uncharacterized LOC728392
237447_at	0.2751	0.0037837	3.31701	-1.76987	1.41828	ADORA2A-AS1	ADORA2A antisense RNA 1
211360_s_at	0.2751	0.00378521	3.31683	-1.77021	1.3438	ITPR2	inositol 1,4,5-trisphosphate receptor type 2
227799_at	0.2751	0.00378705	-3.31661	-1.77061	-1.71023	MYO1G	myosin IG
204078_at	0.2751	0.00378961	-3.31631	-1.77117	-1.16659	P3H4	prolyl 3-hydroxylase family member 4 (non-enzymatic)
241853_at	0.2751	0.00379845	3.31526	-1.77312	0.978747
200971_s_at	0.2751	0.0038127	-3.31357	-1.77624	-1.2038	SERP1	stress-associated endoplasmic reticulum protein 1
215429_s_at	0.2751	0.003818	-3.31294	-1.7774	-2.09727	ZNF428	zinc finger protein 428
229851_s_at	0.2751	0.003825	3.31212	-1.77892	0.804989	C11orf54	chromosome 11 open reading frame 54
213585_s_at	0.2751	0.00382969	3.31156	-1.77994	1.65077	PDCD2	programmed cell death 2
1558111_at	0.2751	0.00383463	3.31098	-1.78102	1.18316	MBNL1	muscleblind like splicing regulator 1
1567167_at	0.2751	0.00383663	3.31075	-1.78145	2.34005
208160_at	0.2751	0.00384025	3.31032	-1.78224	1.47515
1558487_a_at	0.2751	0.00384721	-3.30951	-1.78375	-0.886173	TMED4	transmembrane p24 trafficking protein 4
1555618_s_at	0.2751	0.00384903	3.30929	-1.78414	0.937014	SAE1	SUMO1 activating enzyme subunit 1
236638_at	0.2751	0.0038527	3.30886	-1.78494	1.85659	AMER3	APC membrane recruitment protein 3
1562324_a_at	0.2751	0.00386189	3.30779	-1.78692	1.92015
214175_x_at	0.2751	0.00386697	-3.3072	-1.78802	-1.62295	PDLIM4	PDZ and LIM domain 4
1568821_at	0.2751	0.00386998	3.30685	-1.78867	1.90077	TTC23	tetratricopeptide repeat domain 23
1561912_at	0.2751	0.00387686	3.30605	-1.79015	2.07293
221597_s_at	0.2751	0.00387861	-3.30584	-1.79053	-0.803706	TMEM208	transmembrane protein 208
1559504_at	0.2751	0.00388065	3.30561	-1.79096	2.31462	MIR2682///MIR137///MIR137HG	microRNA 2682///microRNA 137///MIR137 host gene
1562970_at	0.2751	0.00388506	3.30509	-1.79191	1.94584
1563182_at	0.2751	0.00389973	3.3034	-1.79505	2.39197	ACVR1C	activin A receptor type 1C
206647_at	0.2751	0.00390594	3.30268	-1.79638	1.9931	HBZ	hemoglobin subunit zeta
206392_s_at	0.2751	0.00390854	-3.30238	-1.79693	-1.90855	RARRES1	retinoic acid receptor responder 1
1553533_at	0.2751	0.00390871	3.30236	-1.79697	1.15455	JPH1	junctophilin 1
220901_at	0.2751	0.00390927	3.30229	-1.79709	1.61512	GPR157	G protein-coupled receptor 157
211299_s_at	0.2751	0.00391239	3.30193	-1.79775	2.19554	FLOT2	flotillin 2
239571_at	0.2751	0.00392115	3.30093	-1.79962	1.22429
235831_at	0.2751	0.00392542	-3.30044	-1.80052	-1.11076
237905_at	0.2751	0.00392543	3.30043	-1.80053	1.2839	KRT25	keratin 25
235966_at	0.2751	0.00393313	3.29955	-1.80216	0.955186	DAB2IP	DAB2 interacting protein
222198_at	0.2751	0.00394262	3.29846	-1.80417	1.83166
232419_at	0.2751	0.00394991	3.29763	-1.80571	1.54996	TMEM132A	transmembrane protein 132A
215235_at	0.2751	0.00395314	-3.29726	-1.80639	-0.993744	SPTAN1	spectrin alpha, non-erythrocytic 1
244520_at	0.2751	0.0039546	3.2971	-1.8067	1.30752
201041_s_at	0.2751	0.00396059	-3.29641	-1.80796	-1.18375	DUSP1	dual specificity phosphatase 1
202243_s_at	0.2751	0.00396256	-3.29619	-1.80837	-0.638653	PSMB4	proteasome subunit beta 4
208509_s_at	0.2751	0.0039715	3.29517	-1.81025	2.00204	OR7A17	olfactory receptor family 7 subfamily A member 17
242233_at	0.2751	0.00397408	3.29488	-1.81079	1.13844
1564017_at	0.2751	0.00399071	3.293	-1.81428	1.34832	COL18A1-AS1	COL18A1 antisense RNA 1
216464_x_at	0.2751	0.00399315	3.29272	-1.81479	2.00863	PTGDR2	prostaglandin D2 receptor 2
210624_s_at	0.2751	0.0040049	-3.2914	-1.81723	-0.833905	ILVBL	ilvB acetolactate synthase like
227122_at	0.2751	0.00401083	-3.29073	-1.81847	-0.663066	ZNF791	zinc finger protein 791
233062_at	0.2751	0.00401237	3.29056	-1.81879	1.57739	GMDS-AS1	GMDS antisense RNA 1 (head to head)
239849_at	0.2751	0.00401307	3.29048	-1.81893	1.04702
229662_at	0.2751	0.00401746	3.28998	-1.81984	1.5692	MSH3	mutS homolog 3
204708_at	0.2751	0.00401931	3.28978	-1.82023	1.60765	MAPK4	mitogen-activated protein kinase 4
225530_at	0.2751	0.00402243	-3.28943	-1.82087	-0.939097	MOB3A	MOB kinase activator 3A
1561488_at	0.2751	0.00402588	3.28904	-1.82159	1.56792	LOC105377938	uncharacterized LOC105377938
240340_at	0.2751	0.00403657	3.28784	-1.8238	1.5452	SPATA3	spermatogenesis associated 3
237069_s_at	0.2751	0.00405068	3.28627	-1.82671	1.36934	TRPM1	transient receptor potential cation channel subfamily M member 1
216257_at	0.2751	0.00406196	3.28502	-1.82902	1.849	SERPINB13	serpin family B member 13
1561098_at	0.2751	0.00406378	3.28481	-1.8294	1.33968	LINC00616	long intergenic non-protein coding RNA 616
237747_at	0.2751	0.00406724	3.28443	-1.83011	1.05907	LOC100507281	uncharacterized LOC100507281
1563993_at	0.2751	0.00406766	3.28438	-1.83019	1.27373	LOC101929268	uncharacterized LOC101929268
211013_x_at	0.2751	0.00407841	-3.28319	-1.83239	-1.56488	PML	promyelocytic leukemia
234845_at	0.2751	0.00407947	3.28308	-1.83261	1.55674	LOC100130370	uncharacterized LOC100130370
234120_at	0.2751	0.00408178	3.28282	-1.83308	2.27321	LOC105376379	uncharacterized LOC105376379
1552419_s_at	0.2751	0.00408462	3.28251	-1.83366	1.0172	TTLL10	tubulin tyrosine ligase like 10
1555266_a_at	0.2751	0.00408633	3.28232	-1.83401	1.13273	ASXL2	additional sex combs like 2, transcriptional regulator
32062_at	0.2751	0.00409184	-3.28171	-1.83514	-1.1143	LRRC14	leucine rich repeat containing 14
1563033_x_at	0.2751	0.00409885	3.28094	-1.83656	2.33422
231587_at	0.2751	0.00410251	3.28053	-1.8373	1.68836	APOC3	apolipoprotein C3
1556696_s_at	0.2751	0.00410407	-3.28036	-1.83762	-1.64447	NR2F1-AS1	NR2F1 antisense RNA 1
237096_at	0.2751	0.00410726	3.28001	-1.83827	0.966213
243340_at	0.2751	0.00410969	3.27974	-1.83876	1.90168
201566_x_at	0.2751	0.00410974	-3.27974	-1.83877	-1.13642	ID2	inhibitor of DNA binding 2, HLH protein
215846_at	0.2751	0.00411157	3.27954	-1.83914	2.40575
1556489_at	0.2751	0.00412053	3.27856	-1.84096	1.37856	LOC101805491///TMEM247	uncharacterized LOC101805491///transmembrane protein 247
212451_at	0.2751	0.00412058	3.27855	-1.84097	0.737388	SECISBP2L	SECIS binding protein 2 like
1566569_at	0.2751	0.00413107	3.2774	-1.84309	1.56492
238373_at	0.2751	0.00413223	3.27728	-1.84332	1.34247	H1FNT	H1 histone family member N, testis specific
239576_at	0.2751	0.00413315	3.27718	-1.84351	0.903565	MTUS1	microtubule associated tumor suppressor 1
1564039_at	0.2751	0.00413654	3.27681	-1.84419	2.04086	ZSCAN23	zinc finger and SCAN domain containing 23
219765_at	0.2751	0.0041438	-3.27602	-1.84565	-1.01517	ZNF329	zinc finger protein 329
218141_at	0.2751	0.00415529	3.27477	-1.84796	1.37589	UBE2O	ubiquitin conjugating enzyme E2 O
1553165_at	0.2751	0.00415821	3.27445	-1.84855	1.69657	SYNRG	synergin, gamma
232528_at	0.2751	0.00417377	3.27276	-1.85166	1.21748
202388_at	0.2751	0.00418	-3.27209	-1.8529	-1.63203	RGS2	regulator of G-protein signaling 2
235544_x_at	0.2751	0.00419668	3.27029	-1.85622	1.70743	FAM171A2	family with sequence similarity 171 member A2
1561210_at	0.2751	0.00419826	3.27012	-1.85654	1.88854	LOC101928539	uncharacterized LOC101928539
221705_s_at	0.2751	0.00420396	3.26951	-1.85767	0.927191	SIKE1	suppressor of IKBKE 1
208261_x_at	0.2751	0.00420471	3.26943	-1.85781	1.6841	IFNA10	interferon alpha 10
216882_s_at	0.2751	0.00420734	3.26915	-1.85834	1.69004	NEBL	nebulette
243032_at	0.2751	0.00420775	3.2691	-1.85842	2.17497
236119_s_at	0.2751	0.00420925	3.26894	-1.85871	1.74169	SPRR2G	small proline rich protein 2G
1569290_s_at	0.2751	0.00421515	-3.26831	-1.85988	-1.87341	GRIA3	glutamate ionotropic receptor AMPA type subunit 3
1560018_at	0.2751	0.00421936	3.26786	-1.86071	2.48746	ARPP21	cAMP regulated phosphoprotein 21
202014_at	0.2751	0.00423463	-3.26623	-1.86373	-1.53684	PPP1R15A	protein phosphatase 1 regulatory subunit 15A
1563467_at	0.2751	0.00423563	3.26612	-1.86392	1.35927
1569555_at	0.2751	0.00423614	3.26607	-1.86402	1.20285	GDA	guanine deaminase
243933_at	0.2751	0.00423679	3.266	-1.86415	1.01525
217449_at	0.2751	0.00423875	3.26579	-1.86453	2.05371
211687_x_at	0.2751	0.00424259	3.26538	-1.86529	1.94415	KIR3DL1	killer cell immunoglobulin like receptor, three Ig domains and long cytoplasmic tail 1
203711_s_at	0.2751	0.00424575	3.26504	-1.86591	0.978863	HIBCH	3-hydroxyisobutyryl-CoA hydrolase
242425_at	0.2751	0.00424732	3.26488	-1.86622	0.797172
207105_s_at	0.2751	0.00424949	3.26465	-1.86664	0.866477	PIK3R2	phosphoinositide-3-kinase regulatory subunit 2
211620_x_at	0.2751	0.00425218	3.26436	-1.86717	2.20389	LOC101928269///LOC100506403///RUNX1	uncharacterized LOC101928269///uncharacterized LOC100506403///runt related transcription factor 1
220208_at	0.2751	0.00426191	3.26333	-1.86908	1.21264	ADAMTS13	ADAM metallopeptidase with thrombospondin type 1 motif 13
214096_s_at	0.2751	0.00426674	-3.26282	-1.87002	-0.945468	SHMT2	serine hydroxymethyltransferase 2
244118_at	0.2751	0.00427932	3.26149	-1.87247	2.1347	GABRA1	gamma-aminobutyric acid type A receptor alpha1 subunit
227864_s_at	0.2751	0.00427998	-3.26142	-1.8726	-1.01532	MVB12A	multivesicular body subunit 12A
1570141_at	0.2751	0.00428341	3.26106	-1.87327	2.33004	MYO5B	myosin VB
215549_x_at	0.2751	0.00428554	3.26083	-1.87369	0.735417	CTAGE8///CTAGE4///CTAGE9	CTAGE family member 8///CTAGE family member 4///CTAGE family member 9
204768_s_at	0.2751	0.0042964	3.25969	-1.87579	1.01003	FEN1	flap structure-specific endonuclease 1
1570190_at	0.2751	0.00430016	3.25929	-1.87652	1.82068	LSAMP	limbic system-associated membrane protein
229476_s_at	0.2751	0.00430493	3.25879	-1.87745	3.43643	THRSP	thyroid hormone responsive
229168_at	0.2751	0.00430774	3.2585	-1.87799	1.16643	COL23A1	collagen type XXIII alpha 1 chain
234524_at	0.2751	0.00431424	3.25782	-1.87925	1.54137	PRDM15	PR/SET domain 15
1569673_at	0.2751	0.00431486	3.25775	-1.87937	1.4714
200700_s_at	0.2751	0.00431555	-3.25768	-1.8795	-0.982696	KDELR2	KDEL endoplasmic reticulum protein retention receptor 2
1568728_s_at	0.2751	0.0043298	3.25619	-1.88225	1.21612	RNF207	ring finger protein 207
242616_at	0.2751	0.00433299	3.25586	-1.88286	1.30931
52940_at	0.2751	0.00433588	-3.25556	-1.88342	-1.34685	SIGIRR	single Ig and TIR domain containing
1559640_at	0.2751	0.00434273	3.25484	-1.88473	1.90912	ANKFN1	ankyrin repeat and fibronectin type III domain containing 1
1556638_at	0.2751	0.00435731	3.25333	-1.88753	1.66846	PAX7	paired box 7
244088_at	0.2751	0.00435832	3.25323	-1.88772	2.00409
204900_x_at	0.2751	0.00435841	-3.25322	-1.88774	-0.912064	SAP30	Sin3A associated protein 30
214294_at	0.2751	0.00436129	3.25292	-1.88829	1.45396	KIAA0485	uncharacterized LOC57235
239793_at	0.2751	0.00436622	-3.25241	-1.88923	-1.34809
1569755_at	0.2751	0.0043716	3.25185	-1.89026	2.68699	LINC00276	long intergenic non-protein coding RNA 276
234593_at	0.2751	0.00438403	3.25057	-1.89262	2.45707
223985_at	0.2751	0.00438662	3.2503	-1.89311	2.18275	FSD1L	fibronectin type III and SPRY domain containing 1 like
228467_at	0.2751	0.00438664	3.2503	-1.89312	1.77403	PURB	purine rich element binding protein B
1562497_at	0.2751	0.00439831	3.2491	-1.89533	1.03136	MKL2	MKL1/myocardin like 2
1559444_at	0.2751	0.00440244	3.24868	-1.89611	1.02747
244667_at	0.2751	0.00441377	3.24751	-1.89826	1.16819	PRCAT47	prostate cancer-associated 47
219398_at	0.2751	0.00441416	3.24747	-1.89833	1.6672	CIDEC	cell death inducing DFFA like effector c
223003_at	0.2751	0.00441998	-3.24688	-1.89943	-0.797197	C19orf43	chromosome 19 open reading frame 43
241770_x_at	0.2751	0.00442167	3.24671	-1.89975	1.47608
211438_at	0.2751	0.00442268	3.2466	-1.89994	1.9232	TRHR	thyrotropin releasing hormone receptor
1565637_at	0.2751	0.00442545	3.24632	-1.90046	1.85315	PMP22	peripheral myelin protein 22
1562852_at	0.2751	0.00442841	3.24602	-1.90102	1.17047
221467_at	0.2751	0.00442976	3.24588	-1.90127	1.7361	MC4R	melanocortin 4 receptor
1567068_at	0.2751	0.00443276	3.24557	-1.90183	1.26422	OR4D1	olfactory receptor family 4 subfamily D member 1
1554012_at	0.2751	0.00443335	-3.24551	-1.90195	-2.19615	RSPO2	R-spondin 2
232247_at	0.2751	0.00443358	3.24549	-1.90199	0.817394	ZNF502	zinc finger protein 502
241490_s_at	0.2752	0.00444229	3.2446	-1.90362	1.06976	PGBD2	piggyBac transposable element derived 2
243083_at	0.2752	0.00444584	3.24424	-1.90429	1.50651	LOC100287834///LOC100287704	uncharacterized LOC100287834///uncharacterized LOC100287704
204592_at	0.2755	0.00445986	-3.24282	-1.90691	-1.49748	DLG4	discs large MAGUK scaffold protein 4
220161_s_at	0.2755	0.00446092	3.24271	-1.90711	1.49001	EPB41L4B	erythrocyte membrane protein band 4.1 like 4B
225682_s_at	0.2755	0.00446535	-3.24226	-1.90794	-1.50599	POLR3H	RNA polymerase III subunit H
1562365_at	0.2762	0.00448855	3.23992	-1.91226	1.83009	LOC286177	uncharacterized LOC286177
228475_at	0.2762	0.00448908	3.23987	-1.91236	1.9243	CCDC61	coiled-coil domain containing 61
237076_at	0.2762	0.00449179	3.2396	-1.91286	1.77707	NCSTN	nicastrin
209642_at	0.277	0.00450997	-3.23777	-1.91622	-1.63069	BUB1	BUB1 mitotic checkpoint serine/threonine kinase
214406_s_at	0.2772	0.00452104	3.23666	-1.91827	1.36404	SLC7A4	solute carrier family 7 member 4
212663_at	0.2772	0.00452598	-3.23617	-1.91918	-0.845827	FKBP15	FK506 binding protein 15
242014_at	0.2772	0.0045284	3.23593	-1.91962	1.09065
1561512_at	0.2772	0.00454098	3.23467	-1.92193	1.0859	LOC101928861	uncharacterized LOC101928861
217195_at	0.2772	0.00454183	3.23459	-1.92209	1.37444	GCNT1P1	glucosaminyl (N-acetyl) transferase 1, core 2 pseudogene 1
1556964_s_at	0.2772	0.00454535	3.23424	-1.92274	2.83064
201686_x_at	0.2772	0.00454793	3.23398	-1.92321	0.717004	API5	apoptosis inhibitor 5
1564552_at	0.2773	0.00455529	3.23325	-1.92456	1.33913
220304_s_at	0.2775	0.00456292	3.23249	-1.92595	1.55547	CNGB3	cyclic nucleotide gated channel beta 3
242031_at	0.2775	0.00456904	3.23189	-1.92707	2.49442
221655_x_at	0.2779	0.00458136	3.23067	-1.92931	1.39119	EPS8L1	EPS8 like 1
244147_at	0.2779	0.00458492	3.23032	-1.92996	1.85098
56197_at	0.278	0.00459179	-3.22964	-1.93121	-0.86069	TMEM256-PLSCR3///PLSCR3	TMEM256-PLSCR3 readthrough (NMD candidate)///phospholipid scramblase 3
240039_at	0.278	0.00459882	3.22895	-1.93248	1.1997	PLA2R1	phospholipase A2 receptor 1
1559788_at	0.278	0.00460252	3.22859	-1.93315	1.07713
226168_at	0.2782	0.00460987	-3.22787	-1.93448	-1.05374	ZFAND2B	zinc finger AN1-type containing 2B
235643_at	0.2785	0.00462051	3.22682	-1.9364	1.04019	SAMD9L	sterile alpha motif domain containing 9 like
204582_s_at	0.279	0.00463696	3.22522	-1.93936	1.52529	KLK3	kallikrein related peptidase 3
203219_s_at	0.279	0.0046452	-3.22441	-1.94084	-1.58276	APRT	adenine phosphoribosyltransferase
231597_x_at	0.279	0.00464544	3.22439	-1.94089	2.95759
242071_x_at	0.279	0.0046509	3.22386	-1.94186	0.99819	ITGA8	integrin subunit alpha 8
1552590_a_at	0.279	0.00466515	3.22247	-1.94441	1.7235	ABCC12	ATP binding cassette subfamily C member 12
241486_at	0.279	0.00467013	3.22199	-1.9453	1.99379
216229_x_at	0.279	0.00467352	3.22166	-1.94591	1.33815	LOC105379655	uncharacterized LOC105379655
222864_s_at	0.279	0.00468476	3.22058	-1.94791	1.17653	ZNF219	zinc finger protein 219
228797_at	0.279	0.00468666	3.22039	-1.94825	0.752649	NLN	neurolysin
233960_s_at	0.279	0.00468903	3.22016	-1.94867	1.11004	LOC115110	uncharacterized LOC115110
221337_s_at	0.279	0.00469327	3.21976	-1.94942	2.07761	LOC101928551///ADAM29	uncharacterized LOC101928551///ADAM metallopeptidase domain 29
1556851_at	0.279	0.00470517	3.21861	-1.95153	1.66594
1564684_at	0.279	0.00470529	3.2186	-1.95155	1.79785	BTN2A2	butyrophilin subfamily 2 member A2
214476_at	0.279	0.00470952	3.21819	-1.9523	1.63596	TFF2	trefoil factor 2
209150_s_at	0.279	0.00471165	-3.21799	-1.95268	-1.01183	IPO4///TM9SF1	importin 4///transmembrane 9 superfamily member 1
221029_s_at	0.279	0.00471167	-3.21799	-1.95268	-1.46946	WNT5B	Wnt family member 5B
215815_at	0.279	0.00472856	3.21637	-1.95566	1.11968	BUD31	BUD31 homolog
201004_at	0.279	0.00473807	-3.21546	-1.95734	-0.751751	SSR4	signal sequence receptor subunit 4
1569477_at	0.279	0.00474418	3.21487	-1.95841	1.11485
223917_s_at	0.279	0.00474548	-3.21475	-1.95864	-1.03269	SLC39A3	solute carrier family 39 member 3
236963_at	0.279	0.00474702	3.2146	-1.95891	1.47276
236019_at	0.279	0.00474808	3.2145	-1.9591	1.04826	RAB12	RAB12, member RAS oncogene family
224203_at	0.279	0.00474904	3.21441	-1.95926	1.40739	SUFU	SUFU negative regulator of hedgehog signaling
46665_at	0.279	0.00475294	-3.21404	-1.95995	-1.19795	SEMA4C	semaphorin 4C
1556331_a_at	0.279	0.00475679	3.21367	-1.96062	1.14198
237427_at	0.279	0.00476154	3.21322	-1.96146	1.45613
216975_x_at	0.2793	0.00477973	3.2115	-1.96463	1.79076	NPAS1	neuronal PAS domain protein 1
220652_at	0.2793	0.00478043	3.21143	-1.96475	2.03356	KIF24	kinesin family member 24
1554008_at	0.2793	0.00479165	-3.21037	-1.96671	-1.48088	OSMR	oncostatin M receptor
1559705_s_at	0.2793	0.00479259	3.21028	-1.96687	2.1419	PHKA2	phosphorylase kinase regulatory subunit alpha 2
227881_s_at	0.2793	0.00479335	3.21021	-1.967	1.73604	TTC39C	tetratricopeptide repeat domain 39C
243253_at	0.2793	0.00481661	3.20802	-1.97104	0.960072
1554322_a_at	0.2793	0.00483124	-3.20664	-1.97356	-1.47122	HDAC4	histone deacetylase 4
242197_x_at	0.2793	0.00484303	3.20554	-1.97559	2.41319	CD36	CD36 molecule
224576_at	0.2793	0.00484618	-3.20525	-1.97614	-1.09775	ERGIC1	endoplasmic reticulum-golgi intermediate compartment 1
222180_at	0.2793	0.00485077	3.20482	-1.97693	1.06291
207598_x_at	0.2793	0.00485103	3.20479	-1.97697	1.21385	XRCC2	X-ray repair cross complementing 2
204084_s_at	0.2793	0.00485293	-3.20462	-1.9773	-0.805992	CLN5	ceroid-lipofuscinosis, neuronal 5
1559341_at	0.2793	0.00486348	3.20363	-1.9791	1.94723
229399_at	0.2793	0.00486464	3.20353	-1.9793	1.79023	CCDC186	coiled-coil domain containing 186
1552521_a_at	0.2793	0.00487803	3.20228	-1.98159	1.05334	TMEM74	transmembrane protein 74
224498_x_at	0.2793	0.00488367	3.20176	-1.98256	1.1678	AXIN2	axin 2
1552950_at	0.2793	0.00488424	3.20171	-1.98265	1.67763	CFAP161	cilia and flagella associated protein 161
1560588_at	0.2793	0.00488986	3.20118	-1.98361	0.810732
236374_at	0.2793	0.00488991	3.20118	-1.98362	2.48188	CTXN3	cortexin 3
214945_at	0.2793	0.00489051	3.20112	-1.98372	1.47297	LOC101930363///LOC101928349///LOC100507387///FAM153C///FAM153A///FAM153B	uncharacterized LOC101930363///uncharacterized LOC101928349///uncharacterized LOC100507387///family with sequence similarity 153, member C///family with sequence similarity 153 member A///family with sequence similarity 153 member B
36553_at	0.2793	0.00489935	-3.20031	-1.98523	-0.76865	ASMTL	acetylserotonin O-methyltransferase-like
233001_at	0.2793	0.00490105	3.20015	-1.98552	1.37633	SAMD10	sterile alpha motif domain containing 10
242527_at	0.2793	0.00490451	3.19983	-1.9861	2.00283
201482_at	0.2793	0.00491494	-3.19887	-1.98787	-1.27762	QSOX1	quiescin sulfhydryl oxidase 1
219053_s_at	0.2793	0.00491835	-3.19855	-1.98845	-0.945428	VPS37C	VPS37C, ESCRT-I subunit
239079_at	0.2793	0.0049193	3.19847	-1.98861	1.52613	ADAM7	ADAM metallopeptidase domain 7
1569111_at	0.2793	0.00492244	3.19818	-1.98914	1.77155	SOX13	SRY-box 13
1563106_at	0.2793	0.00493577	3.19695	-1.9914	1.72993
36566_at	0.2793	0.00494182	-3.1964	-1.99242	-0.752104	CTNS	cystinosin, lysosomal cystine transporter
206068_s_at	0.2793	0.00495093	3.19556	-1.99395	1.50406	ACADL	acyl-CoA dehydrogenase, long chain
221815_at	0.2793	0.00495429	-3.19526	-1.99452	-1.39003	ABHD2	abhydrolase domain containing 2
1560263_at	0.2793	0.00496402	3.19437	-1.99615	2.48341
1554482_a_at	0.2793	0.00496597	3.19419	-1.99648	1.15028	SAR1B	secretion associated Ras related GTPase 1B
235863_at	0.2793	0.00497362	3.19349	-1.99776	2.12463	JSRP1	junctional sarcoplasmic reticulum protein 1
1553025_at	0.2793	0.00497843	3.19306	-1.99857	1.95121	ADGRG6	adhesion G protein-coupled receptor G6
1555476_at	0.2793	0.00498372	3.19257	-1.99945	1.04198	IREB2	iron responsive element binding protein 2
1569539_at	0.2793	0.00498509	3.19245	-1.99968	1.7873
243240_at	0.2793	0.00498709	3.19227	-2.00001	1.87601
215241_at	0.2793	0.00499104	3.19191	-2.00067	2.08934	ANO3	anoctamin 3
1558668_s_at	0.2793	0.00499617	3.19144	-2.00153	1.56779	SPATA22	spermatogenesis associated 22
221301_at	0.2793	0.00500144	3.19097	-2.00241	1.22203	VWA7	von Willebrand factor A domain containing 7
211695_x_at	0.2793	0.00500291	3.19083	-2.00265	1.3865	MUC1	mucin 1, cell surface associated
1553461_at	0.2793	0.00500325	3.1908	-2.00271	1.78425	FAM9B	family with sequence similarity 9 member B
206970_at	0.2793	0.00501062	3.19014	-2.00394	1.52454	CNTN2	contactin 2
205623_at	0.2793	0.00501727	3.18953	-2.00504	1.06807	ALDH3A1	aldehyde dehydrogenase 3 family member A1
208015_at	0.2793	0.00502485	3.18885	-2.0063	0.949408	SMAD1	SMAD family member 1
223701_s_at	0.2793	0.00502848	3.18852	-2.0069	1.23258	USP47	ubiquitin specific peptidase 47
239677_at	0.2793	0.00502923	3.18846	-2.00702	1.12852
234109_x_at	0.2793	0.0050295	3.18843	-2.00707	1.81418	ONECUT3	one cut homeobox 3
208155_x_at	0.2793	0.00503686	3.18777	-2.00829	1.80893	GAGE12D///GAGE12F///GAGE12H///GAGE12E///GAGE12B///GAGE12C///GAGE2D///GAGE12J///GAGE12G///GAGE13///GAGE12I///GAGE7///GAGE6///GAGE5///GAGE4///GAGE1	G antigen 12D///G antigen 12F///G antigen 12H///G antigen 12E///G antigen 12B///G antigen 12C///G antigen 2D///G antigen 12J///G antigen 12G///G antigen 13///G antigen 12I///G antigen 7///G antigen 6///G antigen 5///G antigen 4///G antigen 1
1552849_at	0.2793	0.00503696	3.18776	-2.0083	1.58684	M1AP	meiosis 1 associated protein
212067_s_at	0.2793	0.00503989	-3.1875	-2.00879	-1.27735	C1R	complement C1r subcomponent
232299_at	0.2793	0.00504289	3.18723	-2.00928	1.01124	C2orf82	chromosome 2 open reading frame 82
211833_s_at	0.2793	0.00504547	-3.187	-2.00971	-1.3723	BAX	BCL2 associated X, apoptosis regulator
1562869_at	0.2793	0.00506175	3.18554	-2.01239	1.21381	LOC101929406	uncharacterized LOC101929406
1554368_at	0.2793	0.00506265	3.18546	-2.01254	2.26722	NT5C1B-RDH14///NT5C1B	NT5C1B-RDH14 readthrough///5'-nucleotidase, cytosolic IB
211076_x_at	0.2793	0.00506511	3.18524	-2.01295	1.70767	ATN1	atrophin 1
232064_at	0.2793	0.0050657	-3.18518	-2.01304	-1.25449	FER	FER tyrosine kinase
1568687_s_at	0.2793	0.00507194	3.18462	-2.01407	2.2802	ATP8B5P	ATPase phospholipid transporting 8B5, pseudogene
228930_at	0.2793	0.00507325	3.18451	-2.01428	0.827032	SCARNA15	small Cajal body-specific RNA 15
201974_s_at	0.2793	0.00507829	3.18406	-2.01511	1.25995	CCZ1	CCZ1 homolog, vacuolar protein trafficking and biogenesis associated
209896_s_at	0.2793	0.00508323	3.18362	-2.01592	1.06585	PTPN11	protein tyrosine phosphatase, non-receptor type 11
235382_at	0.2794	0.00509407	3.18265	-2.0177	1.33939	LVRN	laeverin
220026_at	0.2794	0.00509968	3.18215	-2.01861	1.92487	CLCA4	chloride channel accessory 4
1565578_at	0.2794	0.00510048	3.18208	-2.01874	2.1045
222963_s_at	0.2795	0.00510811	3.1814	-2.01999	1.71075	IL1RAPL1	interleukin 1 receptor accessory protein like 1
237370_at	0.2797	0.00511682	3.18063	-2.02141	0.968572
216686_at	0.2797	0.00512234	3.18014	-2.02231	1.93219	ANKRD36BP2	ankyrin repeat domain 36B pseudogene 2
204158_s_at	0.2804	0.00514018	-3.17857	-2.0252	-1.84511	TCIRG1	T-cell immune regulator 1, ATPase H+ transporting V0 subunit a3
232997_at	0.2805	0.00514657	3.17801	-2.02624	0.826861
227657_at	0.2809	0.0051588	3.17693	-2.02821	1.41617	RNF150	ring finger protein 150
207014_at	0.2811	0.00517557	3.17546	-2.03092	1.54149	GABRA2	gamma-aminobutyric acid type A receptor alpha2 subunit
234583_at	0.2811	0.00517957	3.17511	-2.03156	2.18057	CHL1	cell adhesion molecule L1 like
214295_at	0.2811	0.00518876	3.1743	-2.03304	1.67244	KIAA0485	uncharacterized LOC57235
244605_at	0.2811	0.00519057	3.17415	-2.03333	1.05575
200803_s_at	0.2811	0.00520124	-3.17322	-2.03504	-0.715427	TMBIM6	transmembrane BAX inhibitor motif containing 6
232684_at	0.2811	0.0052039	3.17298	-2.03546	1.42829	ZNF503-AS1	ZNF503 antisense RNA 1
208191_x_at	0.2811	0.00520547	3.17285	-2.03572	1.73576	PSG4	pregnancy specific beta-1-glycoprotein 4
230269_at	0.2811	0.0052075	3.17267	-2.03604	1.42119	B3GALT5	beta-1,3-galactosyltransferase 5
237847_at	0.2811	0.00521311	3.17218	-2.03694	1.3157	NTN1	netrin 1
1556105_at	0.2811	0.00521445	3.17206	-2.03715	0.888352
1552519_at	0.2813	0.0052372	3.17009	-2.04078	2.22743	ACVR1C	activin A receptor type 1C
1554420_at	0.2813	0.00524133	3.16973	-2.04143	1.48991	ATF3	activating transcription factor 3
221717_at	0.2813	0.0052448	3.16943	-2.04199	0.969689
229950_s_at	0.2813	0.00524761	3.16919	-2.04243	1.80535	BORCS6	BLOC-1 related complex subunit 6
1555733_s_at	0.2813	0.00524908	3.16906	-2.04267	1.69388	AP1S3	adaptor related protein complex 1 sigma 3 subunit
1555186_at	0.2813	0.00524949	3.16903	-2.04273	2.07791
201783_s_at	0.2819	0.00527078	-3.16719	-2.0461	-0.657069	RELA	RELA proto-oncogene, NF-kB subunit
217743_s_at	0.2819	0.00528148	-3.16627	-2.04779	-0.761749	TMEM30A	transmembrane protein 30A
222882_s_at	0.2819	0.00530098	3.1646	-2.05086	1.32166	BORCS6	BLOC-1 related complex subunit 6
1553993_s_at	0.2819	0.00530522	-3.16424	-2.05153	-0.827415	MIR6800///MED25	microRNA 6800///mediator complex subunit 25
237144_at	0.2819	0.00531143	3.16371	-2.0525	1.78131	LTBP3	latent transforming growth factor beta binding protein 3
201045_s_at	0.2819	0.00531292	3.16358	-2.05273	1.46023	WTH3DI///RAB6A	RAB6C-like///RAB6A, member RAS oncogene family
233240_at	0.2819	0.00531473	3.16343	-2.05302	1.84623
242500_at	0.2819	0.0053164	3.16328	-2.05328	1.32963
205317_s_at	0.2819	0.00531987	3.16299	-2.05382	1.70021	SLC15A2	solute carrier family 15 member 2
234119_at	0.2819	0.00532007	3.16297	-2.05385	2.12016
1554689_a_at	0.2819	0.0053245	-3.16259	-2.05455	-1.78414	NLGN4X	neuroligin 4, X-linked
1564368_a_at	0.2819	0.00532825	3.16227	-2.05513	2.1864
210319_x_at	0.2819	0.00533064	-3.16207	-2.05551	-1.189	MSX2	msh homeobox 2
208123_at	0.2819	0.00533304	3.16187	-2.05588	1.04395	KCNB2	potassium voltage-gated channel subfamily B member 2
215424_s_at	0.2819	0.00534927	3.16049	-2.05841	0.752375	SNW1	SNW domain containing 1
209356_x_at	0.2819	0.0053555	-3.15996	-2.05938	-1.08898	EFEMP2	EGF containing fibulin like extracellular matrix protein 2
224794_s_at	0.2819	0.00535622	-3.1599	-2.0595	-1.71185	CERCAM	cerebral endothelial cell adhesion molecule
233802_at	0.2819	0.00537211	3.15855	-2.06196	1.20809	MED28	mediator complex subunit 28
202510_s_at	0.2819	0.00537873	-3.158	-2.06299	-1.24092	TNFAIP2	TNF alpha induced protein 2
203980_at	0.2819	0.00538043	3.15785	-2.06325	2.7739	FABP4	fatty acid binding protein 4
1553565_s_at	0.2819	0.00539135	3.15693	-2.06494	1.78271	DDAH1	dimethylarginine dimethylaminohydrolase 1
222753_s_at	0.2819	0.00539796	-3.15638	-2.06596	-0.939661	SPCS3	signal peptidase complex subunit 3
243635_at	0.2819	0.00539804	3.15637	-2.06597	1.38605	DNAJC10	DnaJ heat shock protein family (Hsp40) member C10
236055_at	0.2819	0.00540474	3.15581	-2.067	1.74777	DQX1	DEAQ-box RNA dependent ATPase 1
208258_s_at	0.2819	0.00540961	3.1554	-2.06776	1.3747	GAS2L1	growth arrest specific 2 like 1
207968_s_at	0.2819	0.00541068	3.15531	-2.06792	1.4376	MEF2C	myocyte enhancer factor 2C
1566454_at	0.2819	0.00541326	3.15509	-2.06832	0.937274	LOC100507494	uncharacterized LOC100507494
237710_at	0.2819	0.00541335	3.15508	-2.06833	1.9224
1556262_at	0.2819	0.00541836	3.15466	-2.0691	1.92231	LOC101928818///PWRN1	uncharacterized LOC101928818///Prader-Willi region non-protein coding RNA 1
219504_s_at	0.2819	0.00541862	3.15464	-2.06914	1.17896	RPAP2	RNA polymerase II associated protein 2
223363_at	0.2819	0.00542547	-3.15407	-2.07019	-0.820553	PSMG3	proteasome assembly chaperone 3
204337_at	0.2819	0.00543288	-3.15345	-2.07133	-1.02096	RGS4	regulator of G-protein signaling 4
200075_s_at	0.2819	0.00544388	-3.15253	-2.07301	-0.695855	GUK1	guanylate kinase 1
233737_s_at	0.2819	0.00545314	3.15176	-2.07443	2.05251	LOC284561	uncharacterized LOC284561
206997_s_at	0.2819	0.00545364	3.15172	-2.07451	1.33041	HS6ST1	heparan sulfate 6-O-sulfotransferase 1
1563531_at	0.2819	0.00547666	3.14981	-2.07801	1.08919
1560673_at	0.2819	0.00547734	3.14975	-2.07812	2.25132	KIZ-AS1	KIZ antisense RNA 1
206525_at	0.2819	0.00548445	3.14916	-2.0792	1.11522	GABRR1	gamma-aminobutyric acid type A receptor rho1 subunit
1563845_at	0.2819	0.0054868	3.14897	-2.07956	2.38991	LOC100507387///FAM153A///FAM153B	uncharacterized LOC100507387///family with sequence similarity 153 member A///family with sequence similarity 153 member B
215428_at	0.2819	0.00549092	3.14863	-2.08018	1.10145
208527_x_at	0.2819	0.00549132	3.14859	-2.08024	1.4699	HIST1H2BE	histone cluster 1, H2be
1558537_x_at	0.2819	0.00549783	-3.14806	-2.08123	-1.6962	ZNF844	zinc finger protein 844
1565601_at	0.2819	0.00550626	3.14736	-2.0825	1.63706
233820_at	0.2819	0.00550763	3.14725	-2.08271	1.13059	FAS	Fas cell surface death receptor
1556392_a_at	0.2819	0.00551023	3.14703	-2.0831	1.05675
217591_at	0.2819	0.00551237	-3.14686	-2.08343	-1.21682	SKIL	SKI-like proto-oncogene
215018_at	0.2819	0.00552346	3.14594	-2.0851	1.52716	CEP295	centrosomal protein 295
217350_at	0.2819	0.00552359	3.14593	-2.08512	1.76794	MIR492///KRT19P2	microRNA 492///keratin 19 pseudogene 2
231488_at	0.2819	0.00552976	3.14543	-2.08605	1.73548	OTP	orthopedia homeobox
220153_at	0.2819	0.0055335	-3.14512	-2.08661	-1.48976	ENTPD7	ectonucleoside triphosphate diphosphohydrolase 7
232628_at	0.2819	0.00553715	3.14482	-2.08716	1.52483
213179_at	0.2819	0.00554468	-3.1442	-2.08829	-0.681928	CNOT9	CCR4-NOT transcription complex subunit 9
216074_x_at	0.2819	0.00555739	3.14316	-2.0902	0.941708	WWC1	WW and C2 domain containing 1
236582_at	0.2819	0.00555848	3.14307	-2.09036	2.17249
233913_at	0.2819	0.00555979	3.14297	-2.09056	1.63876	WFDC10A	WAP four-disulfide core domain 10A
207225_at	0.2819	0.00556355	3.14266	-2.09112	2.04135	AANAT	aralkylamine N-acetyltransferase
205081_at	0.2819	0.00557685	-3.14158	-2.09311	-1.62588	CRIP1	cysteine rich protein 1
227697_at	0.2819	0.00557968	-3.14135	-2.09353	-2.48507	SOCS3	suppressor of cytokine signaling 3
241538_at	0.2819	0.00557983	3.14133	-2.09356	1.89315
1562491_at	0.2819	0.00558933	3.14056	-2.09497	2.35629	LOC101928622	uncharacterized LOC101928622
227358_at	0.2819	0.00558968	-3.14053	-2.09502	-1.40322	ZBTB46	zinc finger and BTB domain containing 46
208938_at	0.2819	0.00559517	3.14009	-2.09584	0.814578	PRCC	papillary renal cell carcinoma (translocation-associated)
231686_at	0.2819	0.00559744	3.1399	-2.09618	1.46702	GATM	glycine amidinotransferase
221316_at	0.2819	0.00560538	3.13926	-2.09736	1.94691	CATSPERG	cation channel sperm associated auxiliary subunit gamma
201820_at	0.2819	0.00562062	3.13803	-2.09962	1.45701	KRT5	keratin 5
239039_at	0.2819	0.00562064	-3.13802	-2.09962	-1.27608
224143_at	0.2819	0.00562406	3.13775	-2.10013	1.78896	TTTY8B///TTTY8	testis-specific transcript, Y-linked 8B (non-protein coding)///testis-specific transcript, Y-linked 8 (non-protein coding)
1552718_at	0.2819	0.00563136	3.13716	-2.10121	0.773854	DTD1	D-tyrosyl-tRNA deacylase 1
206386_at	0.2819	0.00563412	3.13694	-2.10162	2.27866	SERPINA7	serpin family A member 7
244050_at	0.2819	0.00563453	-3.1369	-2.10168	-1.13275	HACD4	3-hydroxyacyl-CoA dehydratase 4
1560325_at	0.2819	0.00563715	3.13669	-2.10207	2.18855	LOC105370612	uncharacterized LOC105370612
236167_at	0.2819	0.00563794	3.13663	-2.10218	1.40934
1557215_at	0.2819	0.00563889	3.13655	-2.10232	2.0068	LINC00648	long intergenic non-protein coding RNA 648
241790_at	0.2819	0.00564784	3.13583	-2.10364	0.957035
241376_at	0.2819	0.00568009	3.13325	-2.10839	0.971456
1560733_at	0.2819	0.0056831	3.133	-2.10883	1.33027	ALG5	ALG5, dolichyl-phosphate beta-glucosyltransferase
202499_s_at	0.2819	0.0056842	-3.13292	-2.10899	-1.76315	SLC2A3	solute carrier family 2 member 3
237137_at	0.2819	0.00569315	3.1322	-2.1103	1.76449	SCARNA2	small Cajal body-specific RNA 2
207175_at	0.2819	0.00569631	3.13195	-2.11076	3.1062	ADIPOQ	adiponectin, C1Q and collagen domain containing
209260_at	0.2819	0.00571299	3.13062	-2.11319	1.69749	SFN	stratifin
212437_at	0.2819	0.00571982	-3.13008	-2.11419	-0.698049	CENPB	centromere protein B
244582_at	0.2819	0.00572325	3.12981	-2.11469	2.17218
242783_at	0.2819	0.00573809	3.12863	-2.11684	1.05077
1569243_at	0.2819	0.00574669	3.12795	-2.11809	1.72992
225637_at	0.2819	0.0057567	-3.12716	-2.11954	-0.965029	DEF8	differentially expressed in FDCP 8 homolog
210087_s_at	0.2819	0.00575822	-3.12704	-2.11976	-1.67548	MPZL1	myelin protein zero like 1
232871_at	0.2819	0.00577266	3.1259	-2.12185	2.15378
235530_at	0.2819	0.00578004	3.12532	-2.12291	0.758058
210843_s_at	0.2819	0.00578552	3.12489	-2.1237	2.01824	MFAP3L	microfibrillar associated protein 3 like
219278_at	0.2819	0.00578884	-3.12463	-2.12418	-1.23394	MAP3K6	mitogen-activated protein kinase kinase kinase 6
229778_at	0.2819	0.00579397	3.12422	-2.12491	3.23985	SPX	spexin hormone
201500_s_at	0.2819	0.00580013	-3.12374	-2.1258	-0.697793	PPP1R11	protein phosphatase 1 regulatory inhibitor subunit 11
1552902_a_at	0.2819	0.00580088	-3.12368	-2.12591	-1.39466	FOXP2	forkhead box P2
240594_at	0.2819	0.00580103	3.12367	-2.12593	1.32767
237849_at	0.2819	0.00580553	3.12332	-2.12657	1.00039
206959_s_at	0.2819	0.00580588	3.12329	-2.12662	0.75565	UPF3A	UPF3 regulator of nonsense transcripts homolog A (yeast)
235138_at	0.2819	0.00580882	3.12306	-2.12704	1.06181
228005_at	0.2819	0.00581106	-3.12289	-2.12737	-0.621653	ZXDB	zinc finger, X-linked, duplicated B
239955_at	0.2819	0.00581156	3.12285	-2.12744	1.07858
1560800_at	0.2819	0.00581289	3.12274	-2.12763	2.26059
241592_at	0.2819	0.00581416	3.12264	-2.12781	1.29072
1557613_at	0.2819	0.00582407	3.12187	-2.12923	1.03069	KIF9-AS1	KIF9 antisense RNA 1
242216_at	0.2819	0.0058247	3.12182	-2.12932	1.24321
1553186_x_at	0.2819	0.00582492	3.1218	-2.12935	1.74753	RASEF	RAS and EF-hand domain containing
1557822_at	0.2819	0.00582623	3.1217	-2.12954	2.4234	LOC401134	uncharacterized LOC401134
226988_s_at	0.2819	0.00582681	3.12166	-2.12962	1.89433	MYH14	myosin, heavy chain 14, non-muscle
239285_at	0.2819	0.00582799	3.12156	-2.12979	0.958164
240473_at	0.2819	0.0058283	3.12154	-2.12983	1.26523
207156_at	0.2819	0.00583032	-3.12138	-2.13012	-1.67649	HIST1H2AH///HIST1H2AG///HIST1H2AM///HIST1H2AL///HIST1H2AK///HIST1H2AI	histone cluster 1, H2ah///histone cluster 1, H2ag///histone cluster 1, H2am///histone cluster 1, H2al///histone cluster 1, H2ak///histone cluster 1, H2ai
202657_s_at	0.2819	0.00583398	-3.1211	-2.13064	-0.786705	SERTAD2	SERTA domain containing 2
1553388_at	0.2819	0.00585307	3.11961	-2.13336	1.73229	FAM26D	family with sequence similarity 26 member D
203841_x_at	0.2819	0.00586679	3.11855	-2.13531	1.28286	MAPRE3	microtubule associated protein RP/EB family member 3
242168_at	0.2819	0.0058759	3.11784	-2.1366	1.07218	NDUFS7	NADH:ubiquinone oxidoreductase core subunit S7
244310_at	0.2819	0.00589185	3.11661	-2.13886	0.760994
211828_s_at	0.2819	0.00589936	3.11603	-2.13992	1.82077	TNIK	TRAF2 and NCK interacting kinase
242793_at	0.2819	0.00590705	3.11544	-2.14101	1.59937
1556803_at	0.2819	0.00590941	-3.11526	-2.14134	-1.4666	POLR3B	RNA polymerase III subunit B
238360_s_at	0.2819	0.00591494	3.11483	-2.14212	1.6844	LINC00672	long intergenic non-protein coding RNA 672
202111_at	0.2819	0.00592588	-3.11399	-2.14365	-1.22854	SLC4A2	solute carrier family 4 member 2
234056_at	0.2819	0.00592643	3.11395	-2.14373	1.33797
1569231_x_at	0.2819	0.00592783	3.11384	-2.14393	2.25561
1559629_at	0.2819	0.00594358	3.11263	-2.14614	1.19873	LOC101927710	uncharacterized LOC101927710
1558216_at	0.2819	0.00594848	3.11226	-2.14682	1.49937	AFAP1-AS1	AFAP1 antisense RNA 1
236484_at	0.2819	0.00595614	3.11167	-2.1479	1.04841
202145_at	0.2819	0.00596671	-3.11087	-2.14937	-1.42494	LY6E	lymphocyte antigen 6 complex, locus E
204476_s_at	0.2819	0.00597964	-3.10988	-2.15117	-1.41712	PC	pyruvate carboxylase
222356_at	0.2819	0.0059846	3.1095	-2.15186	1.57843
241147_at	0.2819	0.00599331	3.10884	-2.15307	2.64129
210119_at	0.2819	0.00599533	-3.10869	-2.15336	-2.10704	KCNJ15	potassium voltage-gated channel subfamily J member 15
241588_at	0.2819	0.00599587	3.10865	-2.15343	1.2692
234108_at	0.2819	0.00599666	3.10859	-2.15354	1.95482	TAS2R45	taste 2 receptor member 45
215116_s_at	0.2819	0.00600443	-3.108	-2.15462	-1.57201	DNM1	dynamin 1
215566_x_at	0.2819	0.00601154	-3.10746	-2.1556	-0.941791	LYPLA2	lysophospholipase II
1556704_s_at	0.2819	0.00601757	3.10701	-2.15644	1.56442	LOC101929583///LOC101928195///LOC100996643///LOC100133920///LOC286297	methylenetetrahydrofolate dehydrogenase (NADP+ dependent) 1-like pseudogene///methylenetetrahydrofolate dehydrogenase (NADP+ dependent) 1-like pseudogene///monofunctional C1-tetrahydrofolate synthase, mitochondrial-like///methylenetetrahydrofolate dehydrogenase (NADP+ dependent) 1-like pseudogene///methylenetetrahydrofolate dehydrogenase (NADP+ dependent) 1-like pseudogene
235766_x_at	0.2819	0.00602228	-3.10665	-2.15709	-1.20666	RAB27A	RAB27A, member RAS oncogene family
202493_x_at	0.2819	0.00602318	3.10658	-2.15721	0.944314	GH1///CSHL1///CSH1	growth hormone 1///chorionic somatomammotropin hormone like 1///chorionic somatomammotropin hormone 1
236593_at	0.2819	0.00602461	3.10647	-2.15741	1.20287	LOC100131303	uncharacterized LOC100131303
226755_at	0.2819	0.00602934	3.10612	-2.15806	2.28243	MIR205HG	MIR205 host gene
1552927_at	0.2819	0.00603956	3.10535	-2.15947	1.82438	TAB3	TGF-beta activated kinase 1/MAP3K7 binding protein 3
226582_at	0.2819	0.00604017	-3.1053	-2.15956	-0.796385	LOC400043	uncharacterized LOC400043
221095_s_at	0.2819	0.00605098	3.10449	-2.16105	1.16734	KCNE2	potassium voltage-gated channel subfamily E regulatory subunit 2
233784_at	0.2819	0.00605492	3.10419	-2.16159	1.52629	LOC101927769	uncharacterized LOC101927769
237063_at	0.2819	0.00605756	3.10399	-2.16195	1.44621
238196_at	0.2819	0.00606028	3.10379	-2.16232	1.90522	LOC285095	uncharacterized LOC285095
212187_x_at	0.2819	0.00607191	-3.10291	-2.16392	-2.11414	PTGDS	prostaglandin D2 synthase
1558783_at	0.2819	0.00607505	-3.10268	-2.16435	-1.04352
232192_at	0.2819	0.00608018	3.1023	-2.16505	1.39694	LOC153811///RNF130	uncharacterized LOC153811///ring finger protein 130
1554706_at	0.2819	0.00609031	3.10154	-2.16644	2.28707	OR2L13	olfactory receptor family 2 subfamily L member 13
1566884_at	0.2819	0.00609509	3.10118	-2.16709	1.67062
1557739_at	0.2819	0.00610281	3.10061	-2.16814	1.88322	LOC105372547	uncharacterized LOC105372547
1552664_at	0.2819	0.00610419	-3.1005	-2.16833	-0.800465	FLCN	folliculin
208476_s_at	0.2819	0.00610435	3.10049	-2.16836	1.04513	FRMD4A	FERM domain containing 4A
237676_at	0.2819	0.006115	3.0997	-2.16981	1.72236
243699_at	0.2819	0.006117	3.09955	-2.17008	1.66816	LOC100507006	uncharacterized LOC100507006
229831_at	0.2819	0.00612259	3.09913	-2.17084	2.64321	CNTN3	contactin 3
237353_at	0.2819	0.00612266	3.09913	-2.17085	2.74583
225511_at	0.2819	0.00613342	3.09833	-2.17231	0.994456	GPRC5B	G protein-coupled receptor class C group 5 member B
1563113_at	0.2819	0.00613588	3.09815	-2.17264	1.82014	UBR4	ubiquitin protein ligase E3 component n-recognin 4
203533_s_at	0.2819	0.0061446	3.0975	-2.17383	0.861192	CUL5	cullin 5
236523_at	0.2819	0.00616174	3.09623	-2.17614	5.59333	LOC285556	uncharacterized LOC285556
215304_at	0.2819	0.00616205	3.09621	-2.17619	1.0681
200755_s_at	0.2819	0.00617507	-3.09525	-2.17794	-1.04562	CALU	calumenin
216885_s_at	0.2819	0.0061761	3.09517	-2.17808	0.79272	DCAF8	DDB1 and CUL4 associated factor 8
1560844_at	0.2819	0.00618753	3.09433	-2.17962	1.49588	LOC105378052	uncharacterized LOC105378052
231424_at	0.2819	0.00618758	3.09433	-2.17963	2.19704	SLC5A12	solute carrier family 5 member 12
209631_s_at	0.2819	0.0061902	3.09413	-2.17998	2.36038	SEL1L2///GPR37	SEL1L2 ERAD E3 ligase adaptor subunit///G protein-coupled receptor 37
1561218_s_at	0.2819	0.00619026	3.09413	-2.17999	2.08841	LOC728099	uncharacterized LOC728099
1556467_at	0.2819	0.00619175	3.09402	-2.18019	1.16495	LOC101929734	uncharacterized LOC101929734
205084_at	0.2819	0.00619268	-3.09395	-2.18031	-0.810401	BCAP29	B-cell receptor-associated protein 29
234620_at	0.2819	0.00619591	3.09371	-2.18075	2.14776
219617_at	0.2819	0.00619602	3.0937	-2.18076	0.929933	CAMKMT	calmodulin-lysine N-methyltransferase
202295_s_at	0.2819	0.00620401	-3.09312	-2.18183	-1.73005	CTSH	cathepsin H
210016_at	0.2819	0.00620666	3.09292	-2.18219	2.49345	MYT1L	myelin transcription factor 1 like
220973_s_at	0.2819	0.00621451	-3.09235	-2.18324	-1.00052	SHARPIN	SHANK associated RH domain interactor
1557881_at	0.2819	0.00621953	3.09198	-2.18391	2.42655	ZNF32-AS3	ZNF32 antisense RNA 3
218770_s_at	0.2819	0.00622958	-3.09125	-2.18526	-0.748535	TMEM39B	transmembrane protein 39B
224098_at	0.2819	0.0062316	3.0911	-2.18553	1.71205
235182_at	0.2819	0.0062337	-3.09094	-2.18581	-1.50671	ISM1	isthmin 1, angiogenesis inhibitor
1556437_at	0.2819	0.0062447	3.09014	-2.18728	1.50518	LOC253805	uncharacterized LOC253805
221339_at	0.2819	0.00624571	3.09007	-2.18741	1.76561	OR10C1	olfactory receptor family 10 subfamily C member 1 (gene/pseudogene)
214868_at	0.2819	0.00624975	3.08977	-2.18795	1.50086	PIWIL1	piwi like RNA-mediated gene silencing 1
234224_at	0.2819	0.00624994	3.08976	-2.18797	1.33351
204997_at	0.2819	0.00625315	3.08953	-2.1884	3.15783	GPD1	glycerol-3-phosphate dehydrogenase 1
214824_at	0.2819	0.00625722	3.08923	-2.18894	1.16765
1557470_at	0.2819	0.00625846	3.08914	-2.18911	1.72883	SPATA13	spermatogenesis associated 13
210100_s_at	0.2819	0.00626186	3.08889	-2.18956	1.32101	ABCA2	ATP binding cassette subfamily A member 2
1562828_at	0.2819	0.00626238	3.08885	-2.18963	1.8909
223270_at	0.2819	0.00626472	-3.08868	-2.18994	-0.970149	CTDSPL2	CTD small phosphatase like 2
224135_at	0.2819	0.00626739	3.08849	-2.19029	0.989506	WDR87	WD repeat domain 87
38269_at	0.2819	0.00627721	-3.08778	-2.1916	-0.743917	PRKD2	protein kinase D2
1561705_at	0.2819	0.00629885	3.08621	-2.19446	1.11399
204419_x_at	0.2819	0.0063021	-3.08597	-2.19489	-2.13887	HBG2///HBG1	hemoglobin subunit gamma 2///hemoglobin subunit gamma 1
1558619_at	0.2819	0.00630354	3.08587	-2.19508	1.638	SNORA17B	small nucleolar RNA, H/ACA box 17B
215463_at	0.2819	0.00630583	3.08571	-2.19538	1.49738	OR7E24	olfactory receptor family 7 subfamily E member 24
205717_x_at	0.2819	0.00630891	-3.08548	-2.19579	-1.0278	PCDHGA1///PCDHGA2///PCDHGA3///PCDHGA4///PCDHGA5///PCDHGA6///PCDHGA7///PCDHGA9///PCDHGA10///PCDHGA11///PCDHGB1///PCDHGB2///PCDHGB3///PCDHGB5///PCDHGB6///PCDHGB7///PCDHGC4///PCDHGC5///PCDHGA12///PCDHGA8///PCDHGB4///PCDHGC3	protocadherin gamma subfamily A, 1///protocadherin gamma subfamily A, 2///protocadherin gamma subfamily A, 3///protocadherin gamma subfamily A, 4///protocadherin gamma subfamily A, 5///protocadherin gamma subfamily A, 6///protocadherin gamma subfamily A, 7///protocadherin gamma subfamily A, 9///protocadherin gamma subfamily A, 10///protocadherin gamma subfamily A, 11///protocadherin gamma subfami…
234995_at	0.2819	0.00631089	-3.08534	-2.19605	-0.871229	SPICE1	spindle and centriole associated protein 1
1555377_at	0.2819	0.00631706	3.08489	-2.19686	2.28181	OR4D2	olfactory receptor family 4 subfamily D member 2
217695_x_at	0.2819	0.00631942	3.08472	-2.19717	1.3016
244765_at	0.2819	0.00632774	3.08412	-2.19827	1.23937	LOC102724782	uncharacterized LOC102724782
241834_at	0.2819	0.00634187	3.08311	-2.20013	1.12733	LOC101930404///SNORD116-28///SNORD115-26///SNORD115-13///SNORD115-7///SNORD116-22///SNORD116-4///PWARSN///SNORD107///SNRPN///IPW	uncharacterized LOC101930404///small nucleolar RNA, C/D box 116-28///small nucleolar RNA, C/D box 115-26///small nucleolar RNA, C/D box 115-13///small nucleolar RNA, C/D box 115-7///small nucleolar RNA, C/D box 116-22///small nucleolar RNA, C/D box 116-4///Prader Willi/Angelman region RNA, SNRPN neighbor///small nucleolar RNA, C/D box 107///small nuclear ribonucleoprotein polypeptide N///imprinte…
217655_at	0.2819	0.00635285	-3.08232	-2.20157	-1.63622	LOC100127972	uncharacterized LOC100127972
220324_at	0.2819	0.00635467	3.08219	-2.2018	2.23527	LINC00472	long intergenic non-protein coding RNA 472
215530_at	0.2819	0.00636017	3.0818	-2.20252	1.29186	FANCA	Fanconi anemia complementation group A
237191_x_at	0.2819	0.00637432	3.08078	-2.20437	1.2853
229857_s_at	0.2819	0.0063767	3.08061	-2.20468	1.40376	KANSL1-AS1	KANSL1 antisense RNA 1
211448_s_at	0.2819	0.00638346	3.08013	-2.20556	1.39598	RGS6	regulator of G-protein signaling 6
221264_s_at	0.2819	0.00638412	3.08008	-2.20565	0.70773	TARDBP	TAR DNA binding protein
224795_x_at	0.2819	0.0063925	-3.07949	-2.20674	-3.03573	IGK///IGKC	immunoglobulin kappa locus///immunoglobulin kappa constant
229735_s_at	0.2819	0.00639461	-3.07934	-2.20702	-1.09908	NIPAL3	NIPA like domain containing 3
243545_at	0.2819	0.00641418	3.07794	-2.20956	1.5787
1554774_at	0.2819	0.00641899	3.0776	-2.21018	1.83545	MINA	MYC induced nuclear antigen
233836_at	0.2819	0.00642668	3.07706	-2.21118	1.47081	TNRC6A	trinucleotide repeat containing 6A
218345_at	0.2819	0.00642944	-3.07686	-2.21154	-1.21123	TMEM176A	transmembrane protein 176A
212268_at	0.2819	0.00642947	-3.07686	-2.21154	-1.02123	SERPINB1	serpin family B member 1
1558882_at	0.2819	0.00644088	3.07605	-2.21302	0.960086	HTATSF1P2	HIV-1 Tat specific factor 1 pseudogene 2
206944_at	0.2819	0.00644438	3.0758	-2.21347	0.997426	HTR6	5-hydroxytryptamine receptor 6
242024_at	0.2819	0.00644618	3.07567	-2.2137	0.940643
244361_at	0.2819	0.00644634	3.07566	-2.21372	1.42415
234175_at	0.2819	0.00644757	3.07558	-2.21388	1.40349
229454_at	0.2819	0.00644914	3.07547	-2.21408	0.979408	BCLAF1	BCL2 associated transcription factor 1
1562464_at	0.2819	0.00645342	3.07516	-2.21464	2.53732
223781_x_at	0.2819	0.0064553	3.07503	-2.21488	0.947159	ADH4	alcohol dehydrogenase 4 (class II), pi polypeptide
219923_at	0.2819	0.00645605	3.07498	-2.21497	0.872502	TRIM45	tripartite motif containing 45
236318_x_at	0.2819	0.00645814	3.07483	-2.21524	1.24673	FBLL1	fibrillarin-like 1
235978_at	0.2819	0.00646557	3.07431	-2.2162	2.86772	FABP4	fatty acid binding protein 4
220906_at	0.2819	0.0064703	3.07397	-2.21681	1.16001
242514_at	0.2819	0.00648266	3.0731	-2.2184	1.46228
220595_at	0.2819	0.00648795	-3.07273	-2.21908	-1.55031	PDZRN4	PDZ domain containing ring finger 4
1552835_at	0.2819	0.00648795	3.07273	-2.21908	2.01309	DENND1B	DENN domain containing 1B
208926_at	0.2819	0.00649087	-3.07253	-2.21945	-1.0664	NEU1	neuraminidase 1 (lysosomal sialidase)
239507_at	0.2819	0.00649337	3.07235	-2.21977	1.44516	LINC00608	long intergenic non-protein coding RNA 608
214865_at	0.2819	0.00649374	3.07232	-2.21982	1.28579	DOT1L	DOT1 like histone lysine methyltransferase
237072_at	0.2819	0.00650059	3.07184	-2.2207	1.52983
236786_at	0.2819	0.00650062	3.07184	-2.2207	1.67997	FAM135B	family with sequence similarity 135 member B
225491_at	0.2819	0.00650159	3.07177	-2.22082	1.04686	SLC1A2	solute carrier family 1 member 2
224918_x_at	0.2819	0.00650956	3.07122	-2.22184	1.17973	MGST1	microsomal glutathione S-transferase 1
1557207_s_at	0.2819	0.00651131	3.07109	-2.22207	1.1208	LOC283177	uncharacterized LOC283177
240216_at	0.2819	0.00651689	3.0707	-2.22278	1.05381
233544_at	0.2819	0.00651696	3.0707	-2.22279	0.916016	GNL1	G protein nucleolar 1 (putative)
1570482_at	0.2819	0.00652676	3.07001	-2.22404	1.91358
1557081_at	0.2819	0.00653651	3.06933	-2.22528	0.81179	RBM25	RNA binding motif protein 25
1558819_at	0.2819	0.00654613	3.06866	-2.2265	2.25415	LOC101929759	uncharacterized LOC101929759
207514_s_at	0.2819	0.00654851	3.0685	-2.22681	1.04642	GNAT1	G protein subunit alpha transducin 1
215692_s_at	0.2819	0.00654875	3.06848	-2.22684	1.39453	MPPED2	metallophosphoesterase domain containing 2
231330_at	0.2819	0.00655022	3.06838	-2.22702	1.79226	LINC00445	long intergenic non-protein coding RNA 445
46323_at	0.2819	0.00655281	-3.0682	-2.22735	-0.839137	CANT1	calcium activated nucleotidase 1
203658_at	0.2819	0.00655435	3.06809	-2.22755	0.68001	SLC25A20	solute carrier family 25 member 20
1561504_s_at	0.2819	0.00656375	3.06744	-2.22874	2.77671	MYLK4	myosin light chain kinase family member 4
223023_at	0.2819	0.00656408	-3.06741	-2.22878	-0.824496	BET1L	Bet1 golgi vesicular membrane trafficking protein like
237660_at	0.2819	0.0065658	3.06729	-2.229	2.58833	UNC80	unc-80 homolog, NALCN activator
241258_at	0.2819	0.00657205	3.06686	-2.22979	1.63417
239566_at	0.2819	0.00657253	3.06683	-2.22985	2.01882
220771_at	0.2819	0.00657264	3.06682	-2.22987	1.64892	LINC00328	long intergenic non-protein coding RNA 328
1564208_x_at	0.2819	0.00657553	-3.06662	-2.23023	-1.50355	LINC00957	long intergenic non-protein coding RNA 957
244560_at	0.2819	0.00657775	3.06646	-2.23051	2.078
1556319_at	0.2819	0.00657982	3.06632	-2.23078	0.934382	TRIM44	tripartite motif containing 44
34689_at	0.2819	0.00658553	-3.06593	-2.2315	-0.93832	ATRIP///TREX1	ATR interacting protein///three prime repair exonuclease 1
1569793_at	0.2819	0.00659052	3.06558	-2.23213	1.05074	LOC101929372	uncharacterized LOC101929372
225299_at	0.282	0.006597	3.06513	-2.23295	1.09111	MYO5B	myosin VB
225924_at	0.282	0.00660747	-3.06441	-2.23426	-0.710301	FNIP2	folliculin interacting protein 2
1555875_at	0.282	0.00660909	-3.0643	-2.23447	-1.00372	SRGAP1	SLIT-ROBO Rho GTPase activating protein 1
213386_at	0.2821	0.00662174	3.06342	-2.23606	0.836124	TMEM246	transmembrane protein 246
205300_s_at	0.2821	0.00662558	3.06316	-2.23654	0.947818	SNRNP35	small nuclear ribonucleoprotein U11/U12 subunit 35
232379_at	0.2821	0.00662628	3.06311	-2.23663	1.84827	SKIL	SKI-like proto-oncogene
232908_at	0.2825	0.00664778	3.06163	-2.23932	1.49266	ATAD2B	ATPase family, AAA domain containing 2B
1554534_at	0.2825	0.00665018	3.06147	-2.23963	1.66874	DPYD	dihydropyrimidine dehydrogenase
223394_at	0.2825	0.00665678	-3.06102	-2.24045	-1.03472	SERTAD1	SERTA domain containing 1
223926_at	0.2825	0.00666453	3.06049	-2.24142	1.992	KIF2B	kinesin family member 2B
1557832_at	0.2825	0.00667596	3.0597	-2.24284	2.26203	LOC101926960	uncharacterized LOC101926960
217327_at	0.2825	0.00668643	3.05899	-2.24415	1.90104
200918_s_at	0.2825	0.00668972	-3.05877	-2.24456	-0.716078	SRPRA	SRP receptor alpha subunit
207983_s_at	0.2825	0.00669085	3.05869	-2.2447	0.853501	STAG2	stromal antigen 2
216349_at	0.2825	0.00669465	3.05843	-2.24517	0.791351	DGKH	diacylglycerol kinase eta
1563505_at	0.2825	0.0067009	3.058	-2.24595	1.52562	DUSP16	dual specificity phosphatase 16
244816_at	0.2825	0.00670427	3.05777	-2.24636	1.48856
242333_at	0.2825	0.00670455	3.05776	-2.2464	1.15863
213845_at	0.2825	0.00670468	3.05775	-2.24642	1.70262	GRIK2	glutamate ionotropic receptor kainate type subunit 2
217710_x_at	0.2825	0.00671521	3.05703	-2.24772	1.43343	ITPK1	inositol-tetrakisphosphate 1-kinase
224885_s_at	0.2825	0.00671663	-3.05693	-2.2479	-0.730187	KRTCAP2	keratinocyte associated protein 2
235070_at	0.2825	0.00672029	3.05669	-2.24835	2.09824	RBFOX1	RNA binding protein, fox-1 homolog 1
234820_at	0.2825	0.00672394	3.05644	-2.2488	1.69652	MAS1L	MAS1 proto-oncogene like, G protein-coupled receptor
1561097_at	0.2825	0.00673113	3.05595	-2.24969	1.19129
1564323_at	0.2825	0.00673326	3.05581	-2.24995	1.67492	LOC101928405	uncharacterized LOC101928405
1557024_at	0.2825	0.00673754	3.05552	-2.25048	2.11212
229675_at	0.2826	0.00674566	3.05497	-2.25148	1.80097	MINA	MYC induced nuclear antigen
200001_at	0.2829	0.00675994	-3.054	-2.25324	-0.772516	CAPNS1	calpain small subunit 1
240112_at	0.2829	0.00678821	3.0521	-2.25672	2.16764
235708_at	0.2829	0.00679038	3.05195	-2.25698	2.75621	KLB	klotho beta
209358_at	0.2829	0.00681239	-3.05047	-2.25967	-0.691394	TAF11	TATA-box binding protein associated factor 11
219321_at	0.2829	0.00681534	-3.05028	-2.26003	-1.14146	MPP5	membrane palmitoylated protein 5
1568894_at	0.2829	0.00682612	3.04955	-2.26135	0.876358	LOC101929007	WAS/WASL-interacting protein family member 1
1552627_a_at	0.2829	0.0068334	-3.04907	-2.26223	-1.26942	ARHGAP5	Rho GTPase activating protein 5
227844_at	0.2829	0.00683431	-3.04901	-2.26235	-0.935697	FMNL3	formin like 3
242385_at	0.2829	0.0068375	3.04879	-2.26273	1.65565	RORB	RAR related orphan receptor B
217715_x_at	0.2829	0.00683864	3.04872	-2.26287	1.39617
244198_at	0.2829	0.00683924	3.04868	-2.26295	2.18284	RANBP17	RAN binding protein 17
207099_s_at	0.2829	0.00683979	3.04864	-2.26301	1.24993	CHM	CHM, Rab escort protein 1
233772_at	0.2829	0.00683999	3.04863	-2.26304	2.27441	POU6F2-AS2	POU6F2 antisense RNA 2
1569759_at	0.2829	0.00684063	3.04858	-2.26312	2.72175
1555043_at	0.2829	0.00684821	3.04808	-2.26404	1.9008	LHFPL5	lipoma HMGIC fusion partner-like 5
225548_at	0.2829	0.00685073	3.04791	-2.26434	1.43501	SHROOM3	shroom family member 3
1553447_at	0.2829	0.00685304	3.04776	-2.26462	1.70228	AGBL1	ATP/GTP binding protein like 1
210393_at	0.2829	0.0068535	3.04773	-2.26468	1.94535	LGR5	leucine rich repeat containing G protein-coupled receptor 5
241426_at	0.2829	0.00686412	3.04702	-2.26597	2.41865	CEP44	centrosomal protein 44
243443_at	0.2829	0.00687165	3.04652	-2.26688	2.18472	PPME1	protein phosphatase methylesterase 1
221776_s_at	0.2829	0.00687293	3.04643	-2.26703	0.790366	BRD7	bromodomain containing 7
211588_s_at	0.2829	0.00687393	3.04637	-2.26715	1.78162	PML	promyelocytic leukemia
222097_at	0.2829	0.00688889	3.04538	-2.26896	1.83917
210015_s_at	0.2829	0.00690204	3.0445	-2.27055	1.44648	MAP2	microtubule associated protein 2
234732_s_at	0.2829	0.00690947	3.04401	-2.27144	1.47111	EFCAB6	EF-hand calcium binding domain 6
201183_s_at	0.2829	0.00692032	3.0433	-2.27275	0.721708	CHD4	chromodomain helicase DNA binding protein 4
234766_at	0.2829	0.00692433	3.04303	-2.27323	1.81443	OR8D2	olfactory receptor family 8 subfamily D member 2 (gene/pseudogene)
1554662_at	0.2829	0.00692509	3.04298	-2.27332	1.07202	C17orf47	chromosome 17 open reading frame 47
233111_at	0.2829	0.00692871	3.04274	-2.27376	0.913861	PTCSC1	papillary thyroid carcinoma susceptibility candidate 1 (non-protein coding)
1556014_at	0.2829	0.00693124	3.04258	-2.27406	2.22287	MESP2	mesoderm posterior bHLH transcription factor 2
241594_at	0.2829	0.00693409	3.04239	-2.2744	1.56753	LOC101927133	uncharacterized LOC101927133
214914_at	0.2829	0.00694477	3.04169	-2.27568	1.94259	FAM13C	family with sequence similarity 13 member C
202180_s_at	0.2829	0.00696275	-3.04051	-2.27783	-1.18025	MVP	major vault protein
237601_at	0.2829	0.00696591	3.0403	-2.27821	1.85747	LOC100507277	uncharacterized LOC100507277
1560609_at	0.2829	0.00697002	3.04003	-2.2787	0.900125	CRYZL1	crystallin zeta like 1
209364_at	0.2829	0.00697455	-3.03973	-2.27924	-1.41995	BAD	BCL2 associated agonist of cell death
1557775_a_at	0.2829	0.00698417	3.0391	-2.28039	1.98302
204707_s_at	0.2829	0.00698751	3.03888	-2.28078	1.84021	MAPK4	mitogen-activated protein kinase 4
214106_s_at	0.2829	0.00699235	-3.03857	-2.28136	-1.39897	GMDS	GDP-mannose 4,6-dehydratase
201070_x_at	0.2829	0.00700467	3.03776	-2.28283	0.864273	SF3B1	splicing factor 3b subunit 1
220289_s_at	0.2829	0.00700936	3.03746	-2.28338	1.89401	AIM1L	absent in melanoma 1-like
216046_at	0.2829	0.00701491	3.0371	-2.28404	1.57552
221488_s_at	0.2829	0.00701804	-3.03689	-2.28441	-0.809074	CUTA	cutA divalent cation tolerance homolog
230959_at	0.2829	0.00701839	3.03687	-2.28445	1.35679
221665_s_at	0.2829	0.00701902	3.03683	-2.28453	1.41141	EPS8L1	EPS8 like 1
239312_at	0.2829	0.00702129	3.03668	-2.2848	1.85867
1554982_a_at	0.2829	0.00702204	3.03663	-2.28488	1.69757	EQTN	equatorin
207685_at	0.2829	0.00703081	3.03606	-2.28592	0.995572	CRYBB3	crystallin beta B3
228720_at	0.2829	0.00703517	-3.03578	-2.28644	-1.64293	SORCS2	sortilin related VPS10 domain containing receptor 2
1563876_at	0.2829	0.00704794	3.03495	-2.28795	1.96604	C1orf220	chromosome 1 open reading frame 220
244549_at	0.2829	0.00704895	3.03488	-2.28807	1.62339
213678_at	0.2829	0.00705617	3.03442	-2.28892	1.85868	TMEM151B	transmembrane protein 151B
211920_at	0.2829	0.00706232	3.03402	-2.28964	1.24077	CFB	complement factor B
233434_at	0.2829	0.00706346	3.03395	-2.28978	1.63906
1556984_at	0.2829	0.00706782	3.03366	-2.29029	0.86786
200886_s_at	0.2829	0.00707048	-3.03349	-2.2906	-0.938118	PGAM1	phosphoglycerate mutase 1
242496_at	0.2829	0.00707291	3.03333	-2.29089	1.41177	ART4	ADP-ribosyltransferase 4 (Dombrock blood group)
230926_s_at	0.2829	0.00707697	-3.03307	-2.29136	-1.64741	ODF2L	outer dense fiber of sperm tails 2 like
215664_s_at	0.2829	0.00708743	3.0324	-2.29259	2.25298	EPHA5	EPH receptor A5
205703_at	0.2829	0.00708966	3.03225	-2.29285	1.70411	ATP6V0A2	ATPase H+ transporting V0 subunit a2
216952_s_at	0.2829	0.00709038	-3.03221	-2.29294	-1.41995	LMNB2	lamin B2
232890_at	0.2829	0.00709175	3.03212	-2.2931	0.911529
229229_at	0.2829	0.00710236	3.03144	-2.29434	1.92815	AGXT2	alanine--glyoxylate aminotransferase 2
244500_s_at	0.2829	0.00710372	3.03135	-2.2945	1.5405	EVI5L	ecotropic viral integration site 5 like
208699_x_at	0.2829	0.00710701	-3.03114	-2.29489	-1.49342	TKT	transketolase
215158_s_at	0.2829	0.0071105	-3.03091	-2.2953	-0.688229	DEDD	death effector domain containing
208653_s_at	0.2829	0.00712454	-3.03001	-2.29694	-0.896393	CD164	CD164 molecule
206716_at	0.2829	0.00712564	3.02994	-2.29706	1.5106	UMOD	uromodulin
210007_s_at	0.2829	0.00713744	3.02918	-2.29844	1.26469	GPD2	glycerol-3-phosphate dehydrogenase 2
234548_at	0.2829	0.00714196	3.02889	-2.29897	1.98912
225178_at	0.2829	0.00714205	3.02889	-2.29898	0.838657	TTC14	tetratricopeptide repeat domain 14
1556669_a_at	0.2829	0.00714381	3.02878	-2.29918	1.32062
229848_at	0.2829	0.0071479	3.02851	-2.29966	0.80851	ZNF10	zinc finger protein 10
1557345_at	0.2829	0.00714814	3.0285	-2.29969	1.87667	LOC283516	uncharacterized LOC283516
215368_at	0.2829	0.00714963	3.0284	-2.29986	1.81354	NEB	nebulin
239494_at	0.2829	0.00715648	3.02797	-2.30066	1.59389	FBXW7	F-box and WD repeat domain containing 7
204506_at	0.2829	0.00716474	3.02744	-2.30162	0.847965	PPP3R1	protein phosphatase 3 regulatory subunit B, alpha
204935_at	0.2829	0.00716747	-3.02727	-2.30193	-1.13029	PTPN2	protein tyrosine phosphatase, non-receptor type 2
237570_x_at	0.2829	0.00717196	3.02698	-2.30245	1.8193
212417_at	0.2829	0.00717591	-3.02673	-2.30291	-0.962932	SCAMP1	secretory carrier membrane protein 1
211922_s_at	0.2829	0.00718556	3.02611	-2.30403	0.918466	CAT	catalase
214860_at	0.2829	0.00719114	3.02576	-2.30467	2.23558	SLC9A7	solute carrier family 9 member A7
1558775_s_at	0.2829	0.0071989	3.02526	-2.30557	1.52763	NSMAF	neutral sphingomyelinase activation associated factor
228332_s_at	0.2829	0.00720051	-3.02516	-2.30576	-0.622099	C11orf31	chromosome 11 open reading frame 31
234150_at	0.2829	0.00720468	3.0249	-2.30624	1.66623
234483_at	0.2829	0.00721396	3.02431	-2.30731	1.84368	ACSS1	acyl-CoA synthetase short-chain family member 1
1561135_at	0.2829	0.00721766	3.02408	-2.30773	1.05295
234478_at	0.2829	0.00721791	3.02406	-2.30776	1.6331
208522_s_at	0.2829	0.00722599	3.02355	-2.30869	1.59789	PTCH1	patched 1
241569_at	0.2829	0.00723223	3.02315	-2.30941	2.50806
1561576_a_at	0.2829	0.00723243	3.02314	-2.30943	1.21407
211884_s_at	0.2829	0.00723577	3.02293	-2.30982	1.84199	CIITA	class II major histocompatibility complex transactivator
1562989_at	0.2829	0.00724128	3.02258	-2.31045	1.2218	LOC101929902	uncharacterized LOC101929902
1557455_s_at	0.2829	0.00725856	3.02149	-2.31243	0.879304	MOSPD1	motile sperm domain containing 1
201864_at	0.2829	0.00725864	-3.02149	-2.31244	-0.850371	GDI1	GDP dissociation inhibitor 1
205043_at	0.2829	0.0072739	3.02053	-2.31419	1.41683	CFTR	cystic fibrosis transmembrane conductance regulator
243881_at	0.2829	0.00728728	3.01969	-2.31572	1.88636	SHC3	SHC adaptor protein 3
236021_at	0.2829	0.00728799	3.01964	-2.3158	2.00704
243268_at	0.2829	0.00729194	3.01939	-2.31625	1.90174	PATE2	prostate and testis expressed 2
224520_s_at	0.2829	0.00729759	3.01904	-2.31689	2.05276	BEST3	bestrophin 3
227836_at	0.2829	0.00729916	-3.01894	-2.31707	-0.779251	UTP23	UTP23, small subunit processome component
227473_at	0.2829	0.00729944	-3.01892	-2.3171	-1.01812
224292_at	0.2829	0.0073036	3.01866	-2.31758	1.58994	TTTY13	testis-specific transcript, Y-linked 13 (non-protein coding)
37408_at	0.2829	0.00730397	-3.01864	-2.31762	-1.3809	MRC2	mannose receptor C type 2
211094_s_at	0.2829	0.00731448	3.01798	-2.31881	1.80535	NF1P9///NF1	neurofibromin 1 pseudogene 9///neurofibromin 1
1562229_at	0.2829	0.00732867	3.01709	-2.32043	1.84764
1564060_at	0.2829	0.00733008	3.01701	-2.32059	1.63581	LINC00934	long intergenic non-protein coding RNA 934
1567664_at	0.2829	0.00733767	3.01653	-2.32145	1.6743
223427_s_at	0.2829	0.00734237	3.01624	-2.32198	1.31642	EPB41L4B	erythrocyte membrane protein band 4.1 like 4B
220724_at	0.2829	0.00734495	3.01608	-2.32227	1.9977	CWH43	cell wall biogenesis 43 C-terminal homolog
238116_at	0.2829	0.00735631	-3.01537	-2.32356	-1.3249	DYNLRB2	dynein light chain roadblock-type 2
229174_at	0.2829	0.00735696	-3.01533	-2.32363	-0.737194	C3orf38	chromosome 3 open reading frame 38
232039_at	0.2829	0.00736522	3.01482	-2.32456	1.28808	MAP10	microtubule associated protein 10
207249_s_at	0.2829	0.007366	3.01477	-2.32465	1.58911	SLC28A2	solute carrier family 28 member 2
229616_s_at	0.2829	0.00737349	-3.01431	-2.3255	-1.6756	GRAMD2	GRAM domain containing 2
228681_x_at	0.2829	0.00737831	3.01401	-2.32604	1.03553	DAPK3	death associated protein kinase 3
214592_s_at	0.2829	0.00738051	-3.01387	-2.32629	-1.32257	SNAPC5	small nuclear RNA activating complex polypeptide 5
207615_s_at	0.2829	0.00738191	-3.01378	-2.32644	-1.43972	GAS8-AS1	GAS8 antisense RNA 1
233618_at	0.2829	0.00738407	3.01365	-2.32669	1.94587	LOC105376379	uncharacterized LOC105376379
1564921_at	0.2829	0.00738616	3.01352	-2.32692	1.0947	KRTAP13-1	keratin associated protein 13-1
216431_at	0.2829	0.00739513	3.01297	-2.32793	2.33627
231891_at	0.2829	0.00739541	3.01295	-2.32796	1.45852	STAMBPL1	STAM binding protein like 1
213004_at	0.2829	0.00739925	-3.01271	-2.3284	-1.14459	ANGPTL2	angiopoietin like 2
234247_at	0.2829	0.00740218	3.01253	-2.32872	1.9915
1553146_at	0.2829	0.00740475	3.01237	-2.32901	2.15849	C3orf30	chromosome 3 open reading frame 30
1555384_a_at	0.2829	0.00740591	3.0123	-2.32914	1.37301	LARP4	La ribonucleoprotein domain family member 4
244809_at	0.283	0.00741374	3.01182	-2.33002	1.43512
1562321_at	0.283	0.00742089	3.01137	-2.33082	2.17791	PDK4	pyruvate dehydrogenase kinase 4
232062_at	0.283	0.007424	3.01118	-2.33117	1.76476	ADCY1	adenylate cyclase 1
216688_at	0.2831	0.00743201	3.01069	-2.33207	1.73633
237843_at	0.2832	0.00744894	3.00965	-2.33396	1.88292
221986_s_at	0.2832	0.00744913	3.00964	-2.33398	1.07121	KLHL24	kelch like family member 24
229626_at	0.2832	0.00745131	-3.0095	-2.33422	-1.54547	CCDC184	coiled-coil domain containing 184
223025_s_at	0.2832	0.00745836	3.00907	-2.33501	0.944247	AP1M1	adaptor related protein complex 1 mu 1 subunit
239321_at	0.2832	0.00748663	3.00734	-2.33816	2.10753	LOC441454	prothymosin, alpha pseudogene
241099_at	0.2832	0.00749295	3.00695	-2.33886	2.0397
204747_at	0.2832	0.00750046	3.00649	-2.33969	0.726003	IFIT3	interferon induced protein with tetratricopeptide repeats 3
205691_at	0.2832	0.00750108	-3.00646	-2.33976	-1.61627	SYNGR3	synaptogyrin 3
1555509_a_at	0.2832	0.00750354	3.00631	-2.34003	1.62993	SLC25A41	solute carrier family 25 member 41
213302_at	0.2832	0.0075055	-3.00619	-2.34025	-0.640882	PFAS	phosphoribosylformylglycinamidine synthase
235879_at	0.2832	0.0075153	3.00559	-2.34133	1.48775
240703_s_at	0.2832	0.00751836	3.0054	-2.34167	2.17661	HERC1	HECT and RLD domain containing E3 ubiquitin protein ligase family member 1
235477_at	0.2832	0.0075195	3.00533	-2.3418	1.31142
216214_at	0.2832	0.00752731	3.00486	-2.34266	2.0583
230773_at	0.2832	0.00753357	-3.00448	-2.34335	-0.86808	ZNF385D	zinc finger protein 385D
240188_at	0.2832	0.00753697	3.00427	-2.34373	1.19301
1555913_at	0.2832	0.00753773	3.00422	-2.34381	0.8104	GON4L	gon-4 like
223349_s_at	0.2832	0.00754872	3.00356	-2.34502	0.714189	BOK	BOK, BCL2 family apoptosis regulator
240796_at	0.2832	0.00755548	3.00315	-2.34577	1.41674
1559249_at	0.2832	0.00755739	3.00303	-2.34598	0.93439	ATXN1	ataxin 1
241136_at	0.2832	0.00756118	3.0028	-2.34639	1.76923
203058_s_at	0.2832	0.00756596	-3.00251	-2.34692	-1.10117	PAPSS2	3'-phosphoadenosine 5'-phosphosulfate synthase 2
208352_x_at	0.2832	0.0075728	3.0021	-2.34767	2.51206	ANK1	ankyrin 1
208224_at	0.2832	0.00757471	3.00198	-2.34788	1.33776	HOXB1	homeobox B1
228232_s_at	0.2832	0.00757602	3.00191	-2.34802	1.88291	VSIG2	V-set and immunoglobulin domain containing 2
209598_at	0.2832	0.00757604	-3.0019	-2.34802	-1.35286	PNMA2	paraneoplastic Ma antigen 2
206751_s_at	0.2832	0.00758279	3.0015	-2.34876	2.42792	PCYT1B	phosphate cytidylyltransferase 1, choline, beta
240422_at	0.2832	0.00759057	-3.00103	-2.34962	-1.50099
203400_s_at	0.2832	0.00759542	3.00073	-2.35015	2.13764	TF	transferrin
231803_at	0.2832	0.00759768	3.0006	-2.3504	1.46468	FGF11	fibroblast growth factor 11
226538_at	0.2832	0.00760488	-3.00016	-2.35118	-0.796902	MAN2A1	mannosidase alpha class 2A member 1
209812_x_at	0.2832	0.00761276	2.99969	-2.35204	1.10444	CASP2	caspase 2
241618_at	0.2832	0.00761331	2.99966	-2.3521	1.60563
1568999_at	0.2832	0.00763089	2.9986	-2.35402	1.22307	PSG6///PSG4	pregnancy specific beta-1-glycoprotein 6///pregnancy specific beta-1-glycoprotein 4
242939_at	0.2832	0.0076319	-2.99854	-2.35413	-1.36068	TFDP1	transcription factor Dp-1
215539_at	0.2832	0.00763249	2.9985	-2.35419	2.10302
240978_at	0.2832	0.00763354	2.99844	-2.35431	1.38503
217949_s_at	0.2832	0.00763438	-2.99839	-2.3544	-1.28014	VKORC1	vitamin K epoxide reductase complex subunit 1
206546_at	0.2832	0.0076396	2.99808	-2.35497	1.1913	SYCP2	synaptonemal complex protein 2
1567575_at	0.2832	0.00765108	2.99739	-2.35622	1.62344
226051_at	0.2832	0.00765267	-2.9973	-2.35639	-0.908386	SELM	selenoprotein M
204934_s_at	0.2832	0.00765475	2.99717	-2.35662	0.957711	HPN	hepsin
1558754_at	0.2832	0.00765838	2.99695	-2.35701	1.67455	ZNF763	zinc finger protein 763
201186_at	0.2832	0.00766564	-2.99652	-2.3578	-0.720889	LRPAP1	LDL receptor related protein associated protein 1
225256_at	0.2832	0.00766983	-2.99627	-2.35825	-0.625125
1570479_at	0.2832	0.00767272	2.9961	-2.35856	1.96235	ART1	ADP-ribosyltransferase 1
230791_at	0.2833	0.00767906	2.99572	-2.35925	0.893111
225097_at	0.2833	0.00769268	2.99491	-2.36072	0.906592	HIPK2	homeodomain interacting protein kinase 2
208163_s_at	0.2833	0.00771047	2.99385	-2.36264	1.43667	OSBPL7	oxysterol binding protein like 7
207917_at	0.2833	0.00771372	2.99366	-2.36299	0.846224	NUDT13	nudix hydrolase 13
232178_at	0.2833	0.00771498	2.99358	-2.36313	1.97725	ZNF503	zinc finger protein 503
203193_at	0.2833	0.00772531	2.99297	-2.36424	1.0114	ESRRA	estrogen related receptor alpha
201433_s_at	0.2833	0.00772597	-2.99293	-2.36431	-0.695255	PTDSS1	phosphatidylserine synthase 1
1555656_at	0.2833	0.00773352	2.99248	-2.36513	1.5328	CD300LG	CD300 molecule like family member g
215594_at	0.2833	0.0077371	2.99227	-2.36551	1.8812	ERV9-1	endogenous retrovirus group 9 member 1
242643_x_at	0.2833	0.00773787	2.99222	-2.36559	1.68671
243084_at	0.2833	0.00774021	-2.99209	-2.36584	-1.73329	CALD1	caldesmon 1
1554404_a_at	0.2833	0.00774556	2.99177	-2.36642	0.850159
220254_at	0.2833	0.00774699	-2.99168	-2.36657	-1.89556	LRP12	LDL receptor related protein 12
242130_at	0.2833	0.00774754	2.99165	-2.36663	1.61544
239595_at	0.2833	0.00775546	2.99118	-2.36748	1.34926	GPX2	glutathione peroxidase 2
1569835_at	0.2833	0.00776046	2.99089	-2.36801	2.12921	LOC339352	cytosolic thiouridylase subunit 1 homolog (S. pombe) pseudogene
1553472_at	0.2833	0.0077759	2.98998	-2.36967	2.02377	LOC150596	uncharacterized LOC150596
204766_s_at	0.2833	0.00778978	-2.98916	-2.37115	-1.40615	NUDT1	nudix hydrolase 1
212177_at	0.2833	0.00780426	2.98831	-2.37269	1.13154	PNISR	PNN interacting serine and arginine rich protein
233780_at	0.2833	0.0078058	2.98822	-2.37286	2.02204	RIF1	replication timing regulatory factor 1
1553614_a_at	0.2833	0.00781009	2.98797	-2.37331	1.70831	LINC01198	long intergenic non-protein coding RNA 1198
1561419_at	0.2833	0.00781381	2.98775	-2.37371	1.61938	LOC101927051	uncharacterized LOC101927051
216220_s_at	0.2833	0.00781709	2.98756	-2.37406	1.10199	ADORA1	adenosine A1 receptor
217996_at	0.2833	0.00782441	-2.98713	-2.37484	-1.51113	PHLDA1	pleckstrin homology like domain family A member 1
227586_at	0.2833	0.00782676	-2.98699	-2.37509	-0.813369	TMEM170A	transmembrane protein 170A
222313_at	0.2833	0.00782688	2.98698	-2.3751	1.38184
207826_s_at	0.2833	0.00783448	-2.98654	-2.3759	-1.22898	ID3	inhibitor of DNA binding 3, HLH protein
1566503_at	0.2833	0.00783708	2.98639	-2.37618	1.68203
1569044_at	0.2833	0.00783862	2.9863	-2.37634	1.46991	CDC42BPG	CDC42 binding protein kinase gamma
226552_at	0.2833	0.00783923	-2.98626	-2.37641	-1.40973	IER5L	immediate early response 5 like
241920_x_at	0.2833	0.00784024	2.9862	-2.37651	1.50323	SPG11	spastic paraplegia 11 (autosomal recessive)
243576_at	0.2833	0.00784186	2.98611	-2.37669	1.39197
1554049_s_at	0.2833	0.00784483	-2.98593	-2.377	-1.44454	DCAF8	DDB1 and CUL4 associated factor 8
217434_at	0.2834	0.0078573	2.98521	-2.37832	2.14696	MC2R	melanocortin 2 receptor
218561_s_at	0.2834	0.00786537	-2.98473	-2.37917	-0.684814	LYRM4	LYR motif containing 4
219856_at	0.2834	0.00786543	2.98473	-2.37918	1.32365	C1orf116	chromosome 1 open reading frame 116
1560035_at	0.2835	0.00787814	2.98399	-2.38052	1.07278	RTP5	receptor transporter protein 5 (putative)
216319_at	0.2835	0.0078825	2.98374	-2.38098	1.43594
227315_x_at	0.2835	0.00788585	2.98354	-2.38134	1.41581	PROSC	proline synthetase cotranscribed homolog (bacterial)
216244_at	0.2835	0.00788713	2.98347	-2.38147	1.87822	IL1RN	interleukin 1 receptor antagonist
244130_at	0.2838	0.00791853	-2.98165	-2.38477	-1.36597	HTR2A	5-hydroxytryptamine receptor 2A
213586_at	0.2838	0.00792145	2.98148	-2.38508	1.53872	CDKN2D	cyclin dependent kinase inhibitor 2D
229545_at	0.2838	0.00792284	2.9814	-2.38522	0.769503	FERMT1	fermitin family member 1
239381_at	0.2838	0.00792363	2.98135	-2.38531	1.23007	KLK7	kallikrein related peptidase 7
233839_at	0.2838	0.00792506	2.98127	-2.38546	1.93436	EFCAB6	EF-hand calcium binding domain 6
208791_at	0.2838	0.00792722	-2.98114	-2.38568	-1.57507	CLU	clusterin
240316_at	0.2839	0.00794245	2.98026	-2.38728	1.81618	C9orf57	chromosome 9 open reading frame 57
200055_at	0.2839	0.00795118	-2.97976	-2.38819	-0.787047	TAF10	TATA-box binding protein associated factor 10
224952_at	0.2839	0.0079535	-2.97963	-2.38843	-0.952707	TANC2	tetratricopeptide repeat, ankyrin repeat and coiled-coil containing 2
225750_at	0.2839	0.00795568	-2.9795	-2.38866	-0.738531	ERO1A	endoplasmic reticulum oxidoreductase 1 alpha
244834_at	0.2839	0.00795708	-2.97942	-2.38881	-1.19102	RSG1	REM2 and RAB like small GTPase 1
221721_s_at	0.2841	0.00797175	2.97858	-2.39034	1.30047	LZTS1	leucine zipper tumor suppressor 1
1566278_at	0.2841	0.00797636	2.97831	-2.39082	1.78786
204403_x_at	0.2841	0.00798264	2.97795	-2.39147	0.691457	LOC100294033///TCAF1	protein FAM115A-like///TRPM8 channel associated factor 1
217595_at	0.2841	0.00798439	2.97785	-2.39165	0.933316	GSPT1	G1 to S phase transition 1
53991_at	0.2841	0.00798986	2.97754	-2.39222	0.75894	DENND2A	DENN domain containing 2A
208451_s_at	0.2841	0.00799263	-2.97738	-2.39251	-2.15382	C4B_2///C4B///C4A	complement component 4B (Chido blood group), copy 2///complement component 4B (Chido blood group)///complement component 4A (Rodgers blood group)
243177_at	0.2841	0.00800392	2.97673	-2.39368	1.85233
233928_at	0.2841	0.00800932	2.97642	-2.39424	1.87601	ADAMTS9-AS1	ADAMTS9 antisense RNA 1
1556248_at	0.2841	0.00801058	2.97635	-2.39438	2.16688	EIF1B-AS1	EIF1B antisense RNA 1
1563265_at	0.2841	0.00802402	2.97558	-2.39577	2.22451	HNF4A-AS1	HNF4A antisense RNA 1
1562167_a_at	0.2841	0.00802832	2.97533	-2.39621	1.93509	DEFB122	defensin beta 122 (pseudogene)
231627_at	0.2841	0.00802851	2.97532	-2.39623	1.78692	LINC00919	long intergenic non-protein coding RNA 919
209638_x_at	0.2841	0.00803931	2.97471	-2.39735	1.0322	RGS12	regulator of G-protein signaling 12
244864_at	0.2841	0.00804127	2.97459	-2.39755	2.10476	LOC101929475	uncharacterized LOC101929475
215103_at	0.2841	0.00804312	2.97449	-2.39774	1.41528	CYP2C18	cytochrome P450 family 2 subfamily C member 18
214408_s_at	0.2841	0.00804387	2.97445	-2.39782	1.38891	RFPL1S///RFPL3S	RFPL1 antisense RNA 1///RFPL3 antisense
218387_s_at	0.2841	0.00805099	-2.97404	-2.39856	-0.903545	PGLS	6-phosphogluconolactonase
1559131_a_at	0.2842	0.00805698	2.9737	-2.39917	2.1229	LOC101928047	uncharacterized LOC101928047
219928_s_at	0.2842	0.00807026	2.97294	-2.40054	1.36581	CABYR	calcium binding tyrosine phosphorylation regulated
1560728_at	0.2842	0.0080753	2.97266	-2.40106	2.21329
211301_at	0.2842	0.00808342	2.9722	-2.4019	1.45715	KCND3	potassium voltage-gated channel subfamily D member 3
1567252_at	0.2842	0.00808856	2.9719	-2.40242	1.8961	OR10D3	olfactory receptor family 10 subfamily D member 3 (putative)
1555401_at	0.2842	0.00809552	2.97151	-2.40314	2.08282	SOHLH2	spermatogenesis and oogenesis specific basic helix-loop-helix 2
226164_x_at	0.2842	0.00810859	2.97077	-2.40448	1.02959	RIMKLB	ribosomal modification protein rimK like family member B
241907_at	0.2842	0.00810937	2.97072	-2.40456	0.952198
243691_at	0.2842	0.00812091	2.97007	-2.40574	1.11178
224574_at	0.2842	0.00812802	-2.96967	-2.40647	-0.883622	RNASEK-C17orf49///C17orf49	RNASEK-C17orf49 readthrough///chromosome 17 open reading frame 49
1560207_at	0.2842	0.00812814	2.96966	-2.40648	1.66734	MIR3610///RAD21-AS1	microRNA 3610///RAD21 antisense RNA 1
240955_at	0.2842	0.008136	2.96922	-2.40728	1.84054	PANX3	pannexin 3
233281_at	0.2842	0.00813625	2.96921	-2.40731	1.75187
237026_at	0.2842	0.00814002	2.96899	-2.40769	1.42553
222414_at	0.2842	0.00814203	2.96888	-2.4079	0.639363	KMT2C	lysine methyltransferase 2C
224988_at	0.2842	0.00814269	-2.96884	-2.40797	-0.639727	C6orf89	chromosome 6 open reading frame 89
1569315_s_at	0.2842	0.0081432	2.96881	-2.40802	1.17141	LINC00894	long intergenic non-protein coding RNA 894
237263_at	0.2842	0.00814596	2.96866	-2.4083	2.08489
238489_at	0.2842	0.00815328	2.96825	-2.40905	2.16131	PRKAA2	protein kinase AMP-activated catalytic subunit alpha 2
203927_at	0.2842	0.00815897	-2.96793	-2.40963	-1.09194	NFKBIE	NFKB inhibitor epsilon
217534_at	0.2842	0.00816337	2.96768	-2.41007	1.83632	FAM49B	family with sequence similarity 49 member B
228929_at	0.2843	0.00818109	-2.96668	-2.41187	-1.58122	DNASE1	deoxyribonuclease 1
218467_at	0.2843	0.0081833	-2.96656	-2.4121	-0.618327	PSMG2	proteasome assembly chaperone 2
208533_at	0.2843	0.00818897	2.96624	-2.41267	1.50143	SOX1	SRY-box 1
224402_s_at	0.2843	0.00818907	2.96624	-2.41268	2.28237	FCRL4	Fc receptor like 4
208677_s_at	0.2843	0.00819054	-2.96615	-2.41283	-1.03307	BSG	basigin (Ok blood group)
202118_s_at	0.2844	0.00820711	2.96523	-2.41451	0.80163	CPNE3	copine 3
224141_at	0.2844	0.00820957	2.96509	-2.41476	1.74571	GCC2-AS1	GCC2 antisense RNA 1
201653_at	0.2844	0.0082103	-2.96505	-2.41484	-0.589746	CNIH1	cornichon family AMPA receptor auxiliary protein 1
1561319_at	0.2844	0.00821441	2.96482	-2.41525	2.31078	OTX2-AS1	OTX2 antisense RNA 1 (head to head)
1563975_at	0.2845	0.00822317	2.96433	-2.41614	1.55981	RNF130	ring finger protein 130
232362_at	0.285	0.00824262	2.96325	-2.4181	0.806751	CCDC18	coiled-coil domain containing 18
237269_at	0.285	0.00825438	2.96259	-2.41928	0.986757
244697_at	0.285	0.00826689	2.9619	-2.42054	2.13661
224747_at	0.285	0.00827103	-2.96167	-2.42096	-0.666045	UBE2Q2	ubiquitin conjugating enzyme E2 Q2
206847_s_at	0.285	0.00827204	2.96161	-2.42106	0.910546	HOXA7	homeobox A7
241630_at	0.285	0.00828412	2.96094	-2.42227	0.80212
232842_at	0.285	0.00828504	2.96089	-2.42236	0.987463	DOCK8	dedicator of cytokinesis 8
222141_at	0.285	0.00829493	2.96034	-2.42335	1.34783	KLHL22	kelch like family member 22
206103_at	0.285	0.00829836	2.96015	-2.4237	1.31275	RAC3	ras-related C3 botulinum toxin substrate 3 (rho family, small GTP binding protein Rac3)
217693_x_at	0.285	0.00830317	2.95989	-2.42418	0.685115	MAGOH2P	mago homolog 2, pseudogene
218938_at	0.285	0.00830572	-2.95974	-2.42443	-1.0388	FBXL15	F-box and leucine rich repeat protein 15
231966_at	0.285	0.00830774	2.95963	-2.42464	1.45034	PPP1R9A	protein phosphatase 1 regulatory subunit 9A
231190_at	0.285	0.00830801	2.95962	-2.42466	1.50405	POM121L10P	POM121 transmembrane nucleoporin like 10, pseudogene
234709_at	0.285	0.00831052	2.95948	-2.42491	2.08749	CAPN13	calpain 13
1558300_at	0.285	0.00831575	2.95919	-2.42544	1.72484	EFCAB5	EF-hand calcium binding domain 5
222557_at	0.2855	0.00833508	-2.95812	-2.42737	-0.878118	STMN3	stathmin 3
1556709_a_at	0.286	0.00835697	2.95692	-2.42954	1.13885	LOC283887	uncharacterized LOC283887
220122_at	0.286	0.00836684	-2.95638	-2.43052	-1.84219	MCTP1	multiple C2 and transmembrane domain containing 1
232313_at	0.286	0.00836865	2.95628	-2.4307	2.218	TMEM132C	transmembrane protein 132C
225801_at	0.286	0.0083784	2.95574	-2.43167	2.3337	FBXO32	F-box protein 32
241603_at	0.286	0.00837947	2.95569	-2.43178	1.31679	ATP11A	ATPase phospholipid transporting 11A
1557089_at	0.286	0.0083874	2.95525	-2.43256	2.11749	KIF5C	kinesin family member 5C
243908_at	0.286	0.00838862	2.95518	-2.43268	1.17023
207814_at	0.286	0.00839308	2.95494	-2.43312	1.46609	DEFA6	defensin alpha 6
234277_at	0.286	0.0084008	2.95452	-2.43389	2.45398
1558832_at	0.286	0.00840162	2.95447	-2.43397	1.97413	SLC2A1-AS1	SLC2A1 antisense RNA 1
215514_at	0.2861	0.00842085	2.95342	-2.43587	1.35472
217827_s_at	0.2861	0.0084265	-2.95311	-2.43643	-0.681595	SPG21	spastic paraplegia 21 (autosomal recessive, Mast syndrome)
1563117_at	0.2861	0.00843649	2.95257	-2.43741	1.59525	LOC388456	uncharacterized LOC388456
1554801_at	0.2861	0.00845148	2.95175	-2.43888	1.31752	FNDC9	fibronectin type III domain containing 9
220481_at	0.2861	0.00846147	2.95121	-2.43986	1.31037	GPR75	G protein-coupled receptor 75
220635_at	0.2861	0.00846356	2.9511	-2.44007	1.20994	PSORS1C2	psoriasis susceptibility 1 candidate 2
1561096_at	0.2861	0.00846747	2.95089	-2.44045	1.73047	LINC01091	long intergenic non-protein coding RNA 1091
1561469_at	0.2861	0.00847556	2.95045	-2.44125	1.50075	LOC101928865	uncharacterized LOC101928865
206878_at	0.2861	0.00847606	2.95042	-2.4413	0.93401	DAO	D-amino acid oxidase
235407_at	0.2861	0.00848046	-2.95018	-2.44173	-0.89615	RABGEF1	RAB guanine nucleotide exchange factor 1
236518_at	0.2861	0.00848648	2.94986	-2.44232	1.50265
207938_at	0.2861	0.00849999	2.94913	-2.44364	1.26635	PI15	peptidase inhibitor 15
225151_at	0.2861	0.00850208	2.94901	-2.44384	1.28304	RTKN	rhotekin
1563539_at	0.2861	0.00850275	2.94898	-2.44391	1.72129	LOC101927610	uncharacterized LOC101927610
1562923_at	0.2861	0.00851306	2.94842	-2.44491	1.68351	LOC101928449	uncharacterized LOC101928449
232246_at	0.2861	0.00851996	2.94805	-2.44559	1.24569	TTC28-AS1	TTC28 antisense RNA 1
226533_at	0.2861	0.00852632	2.9477	-2.44621	1.18409	HINT3	histidine triad nucleotide binding protein 3
209215_at	0.2861	0.00853025	-2.94749	-2.44659	-1.3263	MFSD10	major facilitator superfamily domain containing 10
222411_s_at	0.2861	0.00853167	-2.94742	-2.44673	-0.85771	SSR3	signal sequence receptor subunit 3
225029_at	0.2861	0.00853191	-2.9474	-2.44675	-0.957188	LINC01420	long intergenic non-protein coding RNA 1420
1555065_x_at	0.2861	0.00853363	2.94731	-2.44692	1.29386	USP32///USP6	ubiquitin specific peptidase 32///ubiquitin specific peptidase 6
233165_at	0.2861	0.00853697	2.94713	-2.44724	1.92793	NCKIPSD	NCK interacting protein with SH3 domain
240249_at	0.2861	0.00854442	2.94673	-2.44797	1.54434
207820_at	0.2861	0.00854717	2.94658	-2.44823	1.32893	ADH1A	alcohol dehydrogenase 1A (class I), alpha polypeptide
244205_at	0.2861	0.00854732	2.94657	-2.44825	1.996	ALAS2	5'-aminolevulinate synthase 2
231869_at	0.2861	0.00855047	-2.9464	-2.44855	-1.17436	KIAA1586	KIAA1586
205830_at	0.2861	0.00855192	2.94633	-2.4487	1.88676	CLGN	calmegin
1552646_at	0.2861	0.00855628	2.94609	-2.44912	1.06786	IL11RA	interleukin 11 receptor subunit alpha
201040_at	0.2861	0.0085572	-2.94604	-2.44921	-0.824766	GNAI2	G protein subunit alpha i2
208182_x_at	0.2861	0.00856424	2.94566	-2.44989	2.0836	IFNA14	interferon alpha 14
204848_x_at	0.2861	0.00856727	-2.9455	-2.45018	-2.183	HBG2///HBG1	hemoglobin subunit gamma 2///hemoglobin subunit gamma 1
217784_at	0.2861	0.00857338	-2.94517	-2.45078	-1.53672	YKT6	YKT6 v-SNARE homolog (S. cerevisiae)
234142_at	0.2861	0.00857746	2.94496	-2.45117	1.61205
1569779_at	0.2861	0.00858397	2.94461	-2.4518	1.87202	LINC01149	long intergenic non-protein coding RNA 1149
1569523_a_at	0.2863	0.00859332	2.94411	-2.45271	1.77065
222901_s_at	0.2863	0.00860671	2.94339	-2.454	1.88659	KCNJ16	potassium voltage-gated channel subfamily J member 16
203167_at	0.2863	0.0086134	-2.94303	-2.45464	-1.44874	TIMP2	TIMP metallopeptidase inhibitor 2
1556075_at	0.2863	0.00861901	2.94273	-2.45518	1.63157	BMPR2	bone morphogenetic protein receptor type 2
222037_at	0.2863	0.00861986	-2.94269	-2.45527	-1.40675	MCM4	minichromosome maintenance complex component 4
233150_at	0.2863	0.00862177	2.94259	-2.45545	1.41373	GALNTL5	polypeptide N-acetylgalactosaminyltransferase-like 5
215918_s_at	0.2871	0.00865845	2.94064	-2.45898	1.54267	SPTBN1	spectrin beta, non-erythrocytic 1
238804_at	0.2871	0.00865995	2.94056	-2.45912	0.980743
242551_at	0.2871	0.00866263	2.94041	-2.45938	0.893121
1552618_at	0.2871	0.00866541	-2.94027	-2.45964	-1.30827	STX6	syntaxin 6
207709_at	0.2872	0.00867764	2.93962	-2.46081	2.36344	PRKAA2	protein kinase AMP-activated catalytic subunit alpha 2
231943_at	0.2872	0.00868037	2.93947	-2.46108	0.735465	ZFP28	ZFP28 zinc finger protein
205282_at	0.2875	0.00869941	-2.93847	-2.46289	-1.0432	LRP8	LDL receptor related protein 8
1554044_a_at	0.2875	0.00870573	2.93813	-2.4635	1.35008	MRAP	melanocortin 2 receptor accessory protein
241042_at	0.2875	0.00870978	2.93792	-2.46388	1.96231
1559687_at	0.2875	0.00872119	2.93732	-2.46497	1.70621	TMEM221	transmembrane protein 221
219976_at	0.2875	0.0087262	2.93705	-2.46545	1.26274	HOOK1	hook microtubule tethering protein 1
206888_s_at	0.2875	0.00872699	2.93701	-2.46552	1.85471	ARHGDIG	Rho GDP dissociation inhibitor gamma
1567375_at	0.2875	0.00872724	2.937	-2.46555	1.49513
203225_s_at	0.2875	0.00873985	-2.93633	-2.46675	-0.707129	RFK	riboflavin kinase
243941_at	0.2875	0.00874469	2.93608	-2.4672	1.04647
1558623_at	0.2875	0.00874572	2.93602	-2.4673	2.14998	RGPD4-AS1	RGPD4 antisense RNA 1 (head to head)
1553823_a_at	0.2875	0.00875025	2.93579	-2.46773	1.1405	RTP1	receptor transporter protein 1
201417_at	0.2875	0.00875138	-2.93573	-2.46784	-1.12982	SOX4	SRY-box 4
235804_at	0.2878	0.00876894	2.9348	-2.4695	1.26014
224567_x_at	0.2878	0.00877074	2.93471	-2.46967	1.25755	MALAT1	metastasis associated lung adenocarcinoma transcript 1 (non-protein coding)
225283_at	0.2879	0.00878148	-2.93415	-2.47069	-0.766682	ARRDC4	arrestin domain containing 4
243100_at	0.2879	0.00878439	2.934	-2.47097	1.3111	NT5C1B-RDH14///NT5C1B	NT5C1B-RDH14 readthrough///5'-nucleotidase, cytosolic IB
1566114_at	0.2881	0.00879497	2.93344	-2.47197	1.47266
222433_at	0.2882	0.00880542	-2.9329	-2.47295	-0.76437	ENAH	enabled homolog (Drosophila)
1561058_at	0.2882	0.00880787	2.93277	-2.47318	1.33576
205985_x_at	0.2882	0.00881379	2.93246	-2.47374	0.837911	CLCNKB	chloride voltage-gated channel Kb
220290_at	0.2882	0.00881908	2.93218	-2.47424	0.977643	AIM1L	absent in melanoma 1-like
1556420_s_at	0.2882	0.00883794	2.9312	-2.47601	0.895872	YPEL2	yippee like 2
220392_at	0.2882	0.00884049	2.93107	-2.47625	0.895263	EBF2	early B-cell factor 2
237089_at	0.2882	0.00885093	2.93052	-2.47723	1.2858
1566210_at	0.2882	0.00885303	2.93041	-2.47743	1.34981
207916_at	0.2882	0.00885863	2.93012	-2.47795	1.56757
240518_at	0.2882	0.00886063	2.93002	-2.47814	1.87846	LOC729291	translation initiation factor IF-2
240920_at	0.2882	0.00886368	2.92986	-2.47843	0.953144
1561364_at	0.2882	0.00886497	2.92979	-2.47855	1.59538
1563830_a_at	0.2882	0.00886731	2.92967	-2.47877	1.54945	FHAD1	forkhead associated phosphopeptide binding domain 1
240778_at	0.2883	0.00887541	2.92925	-2.47952	1.33689	GINS4	GINS complex subunit 4
213068_at	0.2885	0.00889705	-2.92813	-2.48155	-1.45957	DPT	dermatopontin
214414_x_at	0.2885	0.00889707	-2.92813	-2.48155	-2.00725	HBA2///HBA1	hemoglobin subunit alpha 2///hemoglobin subunit alpha 1
216743_at	0.2885	0.00889899	2.92803	-2.48173	1.60402
206223_at	0.2885	0.00890425	2.92776	-2.48222	1.76189	LMTK2	lemur tyrosine kinase 2
239832_at	0.2888	0.00891632	2.92714	-2.48334	2.00592
238797_at	0.289	0.00893109	2.92637	-2.48472	1.75145	TRIM11	tripartite motif containing 11
1560562_a_at	0.289	0.00893788	-2.92603	-2.48535	-0.927941	ZNF677	zinc finger protein 677
221166_at	0.289	0.00894069	2.92588	-2.48561	1.56214	FGF23	fibroblast growth factor 23
1570515_a_at	0.2893	0.00895818	2.92498	-2.48723	2.33618	FILIP1	filamin A interacting protein 1
207626_s_at	0.2893	0.00895987	2.92489	-2.48739	1.75564	SLC7A2	solute carrier family 7 member 2
243383_at	0.2894	0.00897194	2.92427	-2.4885	1.10934
205674_x_at	0.2894	0.00897439	2.92415	-2.48873	1.04044	FXYD2	FXYD domain containing ion transport regulator 2
214094_at	0.2896	0.00898608	2.92355	-2.48981	1.61855	FUBP1	far upstream element binding protein 1
1552651_a_at	0.2897	0.00899287	-2.9232	-2.49044	-0.770005	RAD51L3-RFFL///RFFL	RAD51L3-RFFL readthrough///ring finger and FYVE-like domain containing E3 ubiquitin protein ligase
240019_at	0.2897	0.00899979	2.92285	-2.49108	2.11605
236613_at	0.2897	0.00900243	2.92271	-2.49132	1.02086	RBM25	RNA binding motif protein 25
1561415_at	0.29	0.00901917	2.92186	-2.49286	2.34271
223012_at	0.29	0.0090279	-2.92141	-2.49367	-0.68896	MIR4746///UBXN6	microRNA 4746///UBX domain protein 6
234651_at	0.29	0.00903073	2.92127	-2.49393	1.78042
238626_at	0.29	0.00905034	2.92027	-2.49573	1.49305	ANKS6	ankyrin repeat and sterile alpha motif domain containing 6
231670_at	0.29	0.00905158	2.92021	-2.49584	1.64341
242910_x_at	0.29	0.00905757	2.9199	-2.49639	1.80883
243448_at	0.29	0.00905956	2.9198	-2.49657	2.00341
1552735_at	0.29	0.00906452	2.91955	-2.49702	1.02246	PCDHGA4	protocadherin gamma subfamily A, 4
1561467_at	0.29	0.00906542	2.9195	-2.49711	1.16178
235445_at	0.29	0.00906753	2.9194	-2.4973	2.08189	LOC101929572///POTEH-AS1///LOC100508046	uncharacterized LOC101929572///POTEH antisense RNA 1///uncharacterized LOC100508046
1569828_at	0.29	0.00907008	2.91927	-2.49753	1.83722	LOC101928107	uncharacterized LOC101928107
231201_at	0.29	0.00907522	2.91901	-2.498	1.51345	PTGER1	prostaglandin E receptor 1
240648_at	0.2901	0.00908855	2.91833	-2.49922	1.08131	LOC101927478	uncharacterized LOC101927478
227377_at	0.2901	0.00909016	2.91825	-2.49937	1.17331	IGF2BP1	insulin like growth factor 2 mRNA binding protein 1
241833_at	0.2905	0.0091171	2.91688	-2.50183	2.32435	PEX5L	peroxisomal biogenesis factor 5 like
227845_s_at	0.2905	0.00911778	2.91685	-2.50189	1.48876	SHD	Src homology 2 domain containing transforming protein D
206140_at	0.2905	0.00911848	2.91682	-2.50195	2.43182	LHX2	LIM homeobox 2
1555571_at	0.2905	0.00912932	2.91627	-2.50294	1.27466	IMMP2L	inner mitochondrial membrane peptidase subunit 2
1567861_at	0.2905	0.00913074	2.9162	-2.50307	1.68842	DNAH14	dynein axonemal heavy chain 14
204406_at	0.2905	0.00914999	2.91523	-2.50481	1.51922	FLT1	fms related tyrosine kinase 1
220828_s_at	0.2905	0.00915096	2.91518	-2.5049	1.25625	LOC55338	uncharacterized LOC55338
242131_at	0.2905	0.00915775	2.91484	-2.50552	1.15256	ATP6	ATP synthase F0 subunit 6
216900_s_at	0.2905	0.00916316	2.91456	-2.50601	1.0913	CHRNA4	cholinergic receptor nicotinic alpha 4 subunit
229368_s_at	0.2905	0.00916405	2.91452	-2.50609	1.08568	ZFAND5	zinc finger AN1-type containing 5
244119_at	0.2905	0.00916419	2.91451	-2.5061	2.134	LINC00551	long intergenic non-protein coding RNA 551
202109_at	0.2905	0.00917166	-2.91414	-2.50678	-0.813356	ARFIP2	ADP ribosylation factor interacting protein 2
204989_s_at	0.2905	0.00917302	2.91407	-2.5069	2.1398	ITGB4	integrin subunit beta 4
211377_x_at	0.2907	0.0091872	2.91336	-2.50818	0.901886	MYCN	v-myc avian myelocytomatosis viral oncogene neuroblastoma derived homolog
221267_s_at	0.2907	0.00918932	-2.91325	-2.50837	-0.684339	ABHD17A	abhydrolase domain containing 17A
235179_at	0.2909	0.0092012	2.91265	-2.50945	0.735403	ZNF641	zinc finger protein 641
1566630_at	0.2911	0.00921396	2.91202	-2.5106	1.35928	PPP2R3B	protein phosphatase 2 regulatory subunit B''beta
223364_s_at	0.2911	0.00922522	2.91145	-2.51161	1.55517	DHX37	DEAH-box helicase 37
243538_at	0.2911	0.00923421	2.91101	-2.51242	1.67129
1555445_at	0.2911	0.00923917	2.91076	-2.51286	1.4289	CA8	carbonic anhydrase 8
1555340_x_at	0.2911	0.00925495	2.90997	-2.51428	1.33762	RAP1A	RAP1A, member of RAS oncogene family
206217_at	0.2911	0.00925975	2.90973	-2.51471	0.812	EDA	ectodysplasin A
1563533_at	0.2911	0.00926113	2.90966	-2.51483	2.49492	GADL1	glutamate decarboxylase like 1
243893_at	0.2911	0.00926475	2.90948	-2.51516	1.75091	KCNC3	potassium voltage-gated channel subfamily C member 3
230912_at	0.2911	0.00926508	2.90947	-2.51519	1.33009	ASPDH	aspartate dehydrogenase domain containing
216581_at	0.2911	0.00927645	2.9089	-2.5162	1.0887
237264_at	0.2911	0.00928115	2.90867	-2.51663	0.96585
223585_x_at	0.2911	0.00928367	2.90854	-2.51685	1.41463	KBTBD2	kelch repeat and BTB domain containing 2
210730_s_at	0.2911	0.00928699	2.90838	-2.51715	1.65436	NPY2R	neuropeptide Y receptor Y2
244860_at	0.2911	0.00928709	-2.90837	-2.51716	-2.09964
228846_at	0.2911	0.00929719	-2.90787	-2.51806	-0.813211	MXD1	MAX dimerization protein 1
216079_at	0.2911	0.00930197	2.90764	-2.51848	1.4939	EPM2A	epilepsy, progressive myoclonus type 2A, Lafora disease (laforin)
215331_at	0.2911	0.00930268	2.9076	-2.51855	1.73056	MYH15	myosin heavy chain 15
221357_at	0.2911	0.00930424	2.90752	-2.51869	1.03627	CHRM4	cholinergic receptor muscarinic 4
206922_at	0.2913	0.00931875	2.90681	-2.51998	0.937468	VCY1B///VCY	variable charge, Y-linked 1B///variable charge, Y-linked
201731_s_at	0.2913	0.00932481	2.90651	-2.52052	0.725654	TPR	translocated promoter region, nuclear basket protein
243451_at	0.2913	0.00932501	2.9065	-2.52054	1.08537
221181_at	0.2915	0.00933712	2.9059	-2.52161	1.17478
216203_at	0.2916	0.00934471	2.90552	-2.52229	1.17832	SPTLC2	serine palmitoyltransferase long chain base subunit 2
1556318_s_at	0.2916	0.00935507	-2.90501	-2.52321	-1.44203	CAND1	cullin associated and neddylation dissociated 1
1569372_at	0.2916	0.00936552	2.9045	-2.52413	1.04603	LOC100507194	uncharacterized LOC100507194
215207_x_at	0.2916	0.00937006	2.90427	-2.52454	0.790365	NUS1///NUS1P3	NUS1 dehydrodolichyl diphosphate synthase subunit///NUS1 dehydrodolichyl diphosphate synthase subunit pseudogene 3
1566823_a_at	0.2916	0.00937075	2.90424	-2.5246	1.054
239280_at	0.2916	0.00937578	2.90399	-2.52504	0.831867
1561574_at	0.2916	0.00937956	2.90381	-2.52538	1.84645
1569927_at	0.2916	0.00938648	2.90347	-2.52599	2.08086
1565819_at	0.2916	0.00938976	2.90331	-2.52628	1.94557
243812_at	0.2916	0.00939539	2.90303	-2.52678	1.89945	IFT27	intraflagellar transport 27
204304_s_at	0.2916	0.00939957	2.90283	-2.52715	1.49426	PROM1	prominin 1
208507_at	0.2916	0.00941116	2.90226	-2.52817	1.01953	OR7C2	olfactory receptor family 7 subfamily C member 2
233600_at	0.2916	0.00941721	2.90196	-2.5287	1.54007	EFCAB6	EF-hand calcium binding domain 6
244760_at	0.2916	0.00941835	2.9019	-2.5288	1.87082
225854_x_at	0.2916	0.00941993	2.90183	-2.52894	0.745251	IRF2BP2	interferon regulatory factor 2 binding protein 2
206474_at	0.2922	0.00944768	2.90047	-2.53138	1.0668	CDK17	cyclin dependent kinase 17
202198_s_at	0.2922	0.00944974	2.90037	-2.53156	1.66423	MTMR3	myotubularin related protein 3
216775_at	0.2922	0.00945413	2.90016	-2.53195	2.29288	USP53	ubiquitin specific peptidase 53
219807_x_at	0.2925	0.00947192	-2.89929	-2.53351	-1.38198	MIA-RAB4B///RAB4B	MIA-RAB4B readthrough (NMD candidate)///RAB4B, member RAS oncogene family
232308_at	0.2925	0.00947732	2.89903	-2.53398	1.82138	TTC21A	tetratricopeptide repeat domain 21A
202720_at	0.2927	0.0094892	-2.89845	-2.53502	-1.04668	TES	testin LIM domain protein
1555359_at	0.2927	0.00949988	2.89793	-2.53595	1.52004	PIGQ	phosphatidylinositol glycan anchor biosynthesis class Q
210116_at	0.2927	0.00949991	2.89793	-2.53596	2.08912	SH2D1A	SH2 domain containing 1A
221159_at	0.2928	0.00951032	2.89742	-2.53686	2.01873
243237_at	0.2928	0.00951384	2.89725	-2.53717	2.24781	CFAP221	cilia and flagella associated protein 221
214058_at	0.2928	0.009519	2.897	-2.53762	1.15919	MYCL	v-myc avian myelocytomatosis viral oncogene lung carcinoma derived homolog
228570_at	0.2928	0.00952417	-2.89675	-2.53807	-1.86821	BTBD11	BTB domain containing 11
1555053_at	0.2928	0.00952986	2.89648	-2.53857	1.50178	SYT9	synaptotagmin 9
244459_at	0.293	0.00954173	2.8959	-2.5396	1.69215
214934_at	0.2932	0.00955222	-2.8954	-2.54051	-0.63563	ATP9B	ATPase phospholipid transporting 9B (putative)
1557758_at	0.2933	0.00956324	2.89486	-2.54147	1.54225	LOC101928535	uncharacterized LOC101928535
1552349_a_at	0.2933	0.00956614	2.89472	-2.54172	1.62401	PRSS33	protease, serine 33
1568964_x_at	0.2935	0.00958744	2.8937	-2.54356	0.716843	SPN	sialophorin
241278_at	0.2935	0.00958825	2.89366	-2.54363	1.72657
222260_at	0.2935	0.00959388	2.89339	-2.54412	1.51021
232559_at	0.2935	0.00959452	2.89336	-2.54418	0.883
206295_at	0.2936	0.00960261	-2.89297	-2.54488	-0.751283	IL18	interleukin 18
1555338_s_at	0.2936	0.0096075	2.89273	-2.5453	1.69986	AQP10	aquaporin 10
221076_at	0.2938	0.00962194	2.89204	-2.54654	1.65715	PELO	pelota homolog (Drosophila)
205869_at	0.2938	0.00962731	2.89178	-2.54701	1.98592	PRSS2///PRSS1	protease, serine 2///protease, serine 1
214602_at	0.2938	0.00963599	2.89137	-2.54775	2.30729	COL4A4	collagen type IV alpha 4 chain
223045_at	0.2938	0.00964151	2.8911	-2.54823	1.19081	EGLN1	egl-9 family hypoxia inducible factor 1
228732_at	0.2938	0.00964152	2.8911	-2.54823	1.01196	GUCY1A2	guanylate cyclase 1 soluble subunit alpha 2
203191_at	0.2942	0.0096607	2.89019	-2.54988	1.52065	ABCB6	ATP binding cassette subfamily B member 6 (Langereis blood group)
232161_x_at	0.2942	0.00966538	2.88996	-2.55028	0.822901	PTPN4	protein tyrosine phosphatase, non-receptor type 4
231918_s_at	0.2943	0.00968191	2.88917	-2.5517	0.953293	GFM2	G elongation factor mitochondrial 2
1553163_at	0.2943	0.00968639	2.88896	-2.55208	1.3534	ADPRHL1	ADP-ribosylhydrolase like 1
1570332_at	0.2943	0.00970103	2.88826	-2.55333	3.24595
213353_at	0.2943	0.00971717	2.8875	-2.55471	1.04937	ABCA5	ATP binding cassette subfamily A member 5
228105_at	0.2943	0.00972273	2.88723	-2.55519	0.760548
217264_s_at	0.2943	0.00972392	2.88718	-2.55529	1.49144	SCNN1A	sodium channel epithelial 1 alpha subunit
214836_x_at	0.2943	0.00972517	-2.88712	-2.5554	-2.49568	IGK///IGKC	immunoglobulin kappa locus///immunoglobulin kappa constant
223904_at	0.2943	0.00973449	2.88667	-2.55619	1.24611	PRKAG3	protein kinase AMP-activated non-catalytic subunit gamma 3
216410_at	0.2943	0.00973758	2.88653	-2.55645	1.15154
37462_i_at	0.2943	0.00973923	-2.88645	-2.55659	-2.0089	SF3A2	splicing factor 3a subunit 2
210938_at	0.2943	0.00974035	2.8864	-2.55669	1.43728	PDX1	pancreatic and duodenal homeobox 1
243386_at	0.2943	0.0097502	2.88593	-2.55753	2.28085	CASZ1	castor zinc finger 1
1558475_at	0.2943	0.00975076	2.8859	-2.55758	1.62893
232457_at	0.2943	0.00975771	2.88557	-2.55817	1.06314	LIMCH1	LIM and calponin homology domains 1
214381_at	0.2943	0.00975984	2.88547	-2.55835	1.31565	LOC441601	septin 7 pseudogene
219887_at	0.2943	0.00975993	2.88547	-2.55836	1.46344	CCDC87	coiled-coil domain containing 87
211806_s_at	0.2943	0.00975994	-2.88547	-2.55836	-0.832715	KCNJ15	potassium voltage-gated channel subfamily J member 15
211341_at	0.2948	0.00978551	2.88426	-2.56053	1.98761	POU4F1	POU class 4 homeobox 1
1555595_at	0.2948	0.0097997	2.88359	-2.56173	1.65544	SCRN3	secernin 3
203036_s_at	0.2948	0.00980233	2.88347	-2.56195	1.23901	MTSS1	metastasis suppressor 1
227721_at	0.2948	0.00980349	2.88341	-2.56205	0.861004	CPAMD8	C3 and PZP like, alpha-2-macroglobulin domain containing 8
1556724_at	0.2948	0.00980461	2.88336	-2.56214	1.51776	LOC100288490	uncharacterized LOC100288490
230615_at	0.2949	0.00982446	2.88243	-2.56382	1.54758	DUOXA2	dual oxidase maturation factor 2
220384_at	0.2949	0.00982816	2.88225	-2.56413	1.82304	NME8	NME/NM23 family member 8
224252_s_at	0.2949	0.00982941	-2.88219	-2.56424	-1.12297	FXYD5	FXYD domain containing ion transport regulator 5
206266_at	0.2949	0.00984008	2.88169	-2.56514	1.27736	GPLD1	glycosylphosphatidylinositol specific phospholipase D1
209024_s_at	0.2949	0.00984102	2.88165	-2.56522	1.03455	SYNCRIP	synaptotagmin binding cytoplasmic RNA interacting protein
205764_at	0.2949	0.00984371	2.88152	-2.56544	1.7559	CSNK1A1	casein kinase 1 alpha 1
215655_at	0.2949	0.00986007	2.88076	-2.56682	2.24143	GRIK2	glutamate ionotropic receptor kainate type subunit 2
242430_at	0.2949	0.00986589	2.88048	-2.56731	1.80695
235638_at	0.2949	0.00986764	2.8804	-2.56746	1.64971	RASSF6	Ras association domain family member 6
215265_at	0.2949	0.00987326	2.88014	-2.56793	1.66988	EMX1	empty spiracles homeobox 1
1558195_at	0.2949	0.00987846	2.8799	-2.56837	2.18046	LINC00592	long intergenic non-protein coding RNA 592
230246_at	0.2949	0.00988734	-2.87948	-2.56911	-1.43843	PLAC9	placenta specific 9
229829_at	0.2949	0.00988764	2.87947	-2.56914	0.6032	LINC00526	long intergenic non-protein coding RNA 526
240686_x_at	0.2949	0.00989069	2.87932	-2.56939	1.46922	TFRC	transferrin receptor
234633_at	0.2949	0.00989117	2.8793	-2.56943	1.63905	KRTAP4-11	keratin associated protein 4-11
242139_s_at	0.2949	0.00989969	-2.8789	-2.57015	-1.0125	ERVK3-1///ZNF8	endogenous retrovirus group K3 member 1///zinc finger protein 8
206470_at	0.2949	0.0098998	-2.8789	-2.57016	-1.631	PLXNC1	plexin C1
210330_at	0.295	0.00990917	-2.87846	-2.57094	-1.05644	SGCD	sarcoglycan delta
224169_at	0.295	0.00991199	2.87833	-2.57118	1.38689	NPFFR2	neuropeptide FF receptor 2
1568596_a_at	0.295	0.00992935	2.87752	-2.57263	1.13123	TROAP	trophinin associated protein
219443_at	0.295	0.00994147	-2.87696	-2.57364	-0.871945	TASP1	taspase 1
1568785_a_at	0.295	0.0099542	2.87637	-2.5747	2.2471	LOC102725116	uncharacterized LOC102725116
235095_at	0.295	0.00995873	2.87616	-2.57508	1.73345	BICDL2	BICD family like cargo adaptor 2
208728_s_at	0.295	0.00995878	-2.87615	-2.57508	-0.670638	CDC42	cell division cycle 42
215249_at	0.295	0.00996403	2.87591	-2.57552	1.86332	RPL35A	ribosomal protein L35a
1560091_a_at	0.295	0.00996687	2.87578	-2.57576	2.1692	PHF21B	PHD finger protein 21B
208872_s_at	0.295	0.00996822	-2.87572	-2.57587	-0.783994	REEP5	receptor accessory protein 5
241228_at	0.295	0.00997544	2.87538	-2.57647	1.55586
233746_x_at	0.295	0.00997587	2.87536	-2.5765	0.984154	SERF2-C15ORF63///MIR1282///HYPK///SERF2	SERF2-C15orf63 readthrough///microRNA 1282///huntingtin interacting protein K///small EDRK-rich factor 2
223864_at	0.295	0.00997677	2.87532	-2.57658	1.76934	ANKRD30A	ankyrin repeat domain 30A
203130_s_at	0.295	0.00997945	-2.8752	-2.5768	-0.838945	KIF5C	kinesin family member 5C
241378_at	0.2951	0.0099936	2.87454	-2.57798	1.49625	MIB2	mindbomb E3 ubiquitin protein ligase 2
244407_at	0.2951	0.00999663	2.8744	-2.57823	0.827654	CYP39A1	cytochrome P450 family 39 subfamily A member 1
1555726_at	0.2951	0.00999828	2.87433	-2.57837	1.93522	GAFA3	FGF-2 activity-associated protein 3
219788_at	0.2952	0.0100046	2.87403	-2.57889	0.885207	PILRA	paired immunoglobin like type 2 receptor alpha
201631_s_at	0.2952	0.01001	-2.87379	-2.57934	-1.19703	IER3	immediate early response 3
201717_at	0.2955	0.0100272	-2.87299	-2.58076	-0.593203	MRPL49	mitochondrial ribosomal protein L49
231071_at	0.2955	0.0100314	2.8728	-2.58111	0.957797	YTHDF3-AS1	YTHDF3 antisense RNA 1 (head to head)
1553280_at	0.2955	0.010038	2.87249	-2.58165	1.08641	PUS10	pseudouridylate synthase 10
230716_at	0.2959	0.0100644	2.87128	-2.58383	1.69776	SMLR1	small leucine rich protein 1
218227_at	0.2959	0.0100646	-2.87127	-2.58385	-1.30154	NUBP2	nucleotide binding protein 2
1561926_at	0.2959	0.0100683	2.8711	-2.58415	2.26903
227873_at	0.2963	0.0101119	-2.8691	-2.58774	-0.718385	TXNDC15	thioredoxin domain containing 15
223859_at	0.2963	0.0101208	2.8687	-2.58846	1.76965	EPB41L4B	erythrocyte membrane protein band 4.1 like 4B
216441_at	0.2963	0.0101219	2.86865	-2.58855	1.75289
1566438_at	0.2963	0.010133	2.86814	-2.58946	0.928237	LOC283475	uncharacterized LOC283475
239900_x_at	0.2963	0.0101334	2.86812	-2.58949	0.9414
216263_s_at	0.2963	0.0101493	2.8674	-2.59079	1.06163	NGDN	neuroguidin
200704_at	0.2963	0.0101546	-2.86716	-2.59123	-0.750932	LITAF	lipopolysaccharide induced TNF factor
215871_at	0.2963	0.0101599	2.86692	-2.59166	1.78122	PLA2G5	phospholipase A2 group V
216171_at	0.2963	0.0101862	2.86572	-2.5938	2.4763
243781_at	0.2963	0.0101874	2.86566	-2.5939	1.69419
244511_at	0.2963	0.010196	2.86527	-2.5946	1.04759
243932_at	0.2963	0.0101972	2.86522	-2.5947	1.78058
236511_at	0.2963	0.0101986	2.86516	-2.59481	1.08066
225631_at	0.2963	0.0102066	2.8648	-2.59546	0.922113	EEPD1	endonuclease/exonuclease/phosphatase family domain containing 1
227555_s_at	0.2963	0.0102241	-2.864	-2.59688	-1.40772	KHSRP	KH-type splicing regulatory protein
236901_at	0.2963	0.0102242	-2.864	-2.59689	-0.954418
240332_at	0.2963	0.0102283	2.86381	-2.59723	1.08499
223642_at	0.2963	0.0102399	2.86329	-2.59816	2.01439	ZIC2	Zic family member 2
240475_at	0.2963	0.0102452	2.86305	-2.59859	1.5616	EGOT	eosinophil granule ontogeny transcript (non-protein coding)
220551_at	0.2963	0.0102465	2.86299	-2.5987	1.98004	SLC17A6	solute carrier family 17 member 6
215205_x_at	0.2963	0.0102659	2.86211	-2.60027	1.58662	NCOR2	nuclear receptor corepressor 2
218214_at	0.2963	0.010267	-2.86207	-2.60036	-0.772834	ATG101	autophagy related 101
231986_at	0.2963	0.0102685	2.862	-2.60047	1.56349	RIMS1	regulating synaptic membrane exocytosis 1
206114_at	0.2963	0.0102753	2.86169	-2.60102	0.900036	EPHA4	EPH receptor A4
216513_at	0.2963	0.0102792	2.86152	-2.60134	2.04688	DCT	dopachrome tautomerase
220555_s_at	0.2963	0.0102827	2.86136	-2.60162	1.57739	PDZD7	PDZ domain containing 7
238310_at	0.2963	0.010293	2.8609	-2.60245	1.56445
242970_at	0.2963	0.0102959	2.86077	-2.60268	1.10314	DIP2B	disco interacting protein 2 homolog B
207717_s_at	0.2963	0.0103006	2.86056	-2.60306	1.75936	PKP2	plakophilin 2
241248_at	0.2963	0.0103034	2.86043	-2.60329	1.54742
203168_at	0.2963	0.0103143	-2.85994	-2.60417	-1.13678	ATF6B	activating transcription factor 6 beta
224457_at	0.2963	0.0103161	2.85986	-2.60431	1.24689	FOXD2-AS1	FOXD2 antisense RNA 1 (head to head)
236096_at	0.2963	0.0103177	2.85979	-2.60443	2.01411	SIPA1L3	signal induced proliferation associated 1 like 3
234744_x_at	0.2963	0.0103199	2.85969	-2.60461	1.39894	KIF20B	kinesin family member 20B
225636_at	0.2963	0.0103253	-2.85945	-2.60505	-0.854176	STAT2	signal transducer and activator of transcription 2
231567_s_at	0.2963	0.0103285	2.8593	-2.6053	1.08025	CCDC62	coiled-coil domain containing 62
219072_at	0.2963	0.0103292	-2.85927	-2.60536	-1.06907	BCL7C	BCL tumor suppressor 7C
204790_at	0.2963	0.0103358	-2.85898	-2.60589	-0.65224	SMAD7	SMAD family member 7
231360_at	0.2963	0.010344	2.85861	-2.60655	0.960876	C20orf141	chromosome 20 open reading frame 141
215705_at	0.2963	0.0103604	2.85788	-2.60786	1.34599	PPP5C	protein phosphatase 5 catalytic subunit
1566696_at	0.2963	0.010363	2.85776	-2.60807	1.60639
244423_at	0.2963	0.0103652	2.85766	-2.60825	1.78397
211775_x_at	0.2963	0.0103658	2.85764	-2.60829	1.79503
215010_s_at	0.2963	0.0103716	2.85738	-2.60875	1.69079	BRSK2	BR serine/threonine kinase 2
1566893_at	0.2963	0.0103743	2.85726	-2.60897	2.36283
217498_at	0.2963	0.0103748	2.85723	-2.60901	2.21903	GDF11	growth differentiation factor 11
244222_at	0.2963	0.0103757	2.85719	-2.60909	1.39215
217304_at	0.2963	0.0103809	2.85696	-2.6095	1.38438	SHMT1	serine hydroxymethyltransferase 1
243042_at	0.2963	0.0103859	2.85674	-2.6099	0.825706	MIGA1	mitoguardin 1
223235_s_at	0.2963	0.0103976	-2.85622	-2.61083	-1.22952	SMOC2	SPARC related modular calcium binding 2
216693_x_at	0.2963	0.0104003	-2.8561	-2.61105	-0.784317	HDGFRP3	hepatoma-derived growth factor, related protein 3
236636_at	0.2963	0.0104054	2.85587	-2.61145	1.65572
219857_at	0.2963	0.0104075	2.85578	-2.61162	1.42437	PLEKHS1	pleckstrin homology domain containing S1
228560_at	0.2963	0.0104084	2.85574	-2.61169	1.30564	CHDH	choline dehydrogenase
241139_at	0.2963	0.0104107	2.85564	-2.61188	2.16478
52164_at	0.2963	0.0104112	-2.85562	-2.61191	-0.705046	C11orf24	chromosome 11 open reading frame 24
209263_x_at	0.2963	0.0104116	-2.85559	-2.61195	-0.745289	TSPAN4	tetraspanin 4
203759_at	0.2963	0.010418	2.85531	-2.61245	0.966789	ST3GAL4	ST3 beta-galactoside alpha-2,3-sialyltransferase 4
213909_at	0.2963	0.0104256	-2.85498	-2.61306	-2.09292	LRRC15	leucine rich repeat containing 15
236923_x_at	0.2963	0.0104299	2.85478	-2.6134	1.27809
214607_at	0.2963	0.0104313	2.85472	-2.61351	0.818427	PAK3	p21 (RAC1) activated kinase 3
207909_x_at	0.2963	0.0104321	2.85468	-2.61358	1.62238	DAZ4///DAZ2///DAZ3///DAZ1	deleted in azoospermia 4///deleted in azoospermia 2///deleted in azoospermia 3///deleted in azoospermia 1
209371_s_at	0.2963	0.010441	2.85429	-2.61428	1.28618	SH3BP2	SH3 domain binding protein 2
217028_at	0.2963	0.0104459	-2.85408	-2.61467	-1.67209	CXCR4	C-X-C motif chemokine receptor 4
241753_at	0.2963	0.0104464	2.85405	-2.61471	1.30151
208205_at	0.2963	0.0104522	2.8538	-2.61517	0.899136	PCDHA9	protocadherin alpha 9
1559573_at	0.2963	0.0104556	2.85364	-2.61544	1.74026	LINC01093	long intergenic non-protein coding RNA 1093
217582_at	0.2963	0.0104575	2.85356	-2.61559	1.93748
222133_s_at	0.2963	0.0104722	2.85291	-2.61676	0.856664	PHF20L1	PHD finger protein 20-like 1
1561658_at	0.2963	0.010474	2.85283	-2.6169	1.4978
215262_at	0.2963	0.0104755	-2.85277	-2.61701	-2.01628
1557791_at	0.2963	0.0104768	2.85271	-2.61712	1.4775
236819_at	0.2963	0.0104806	2.85254	-2.61742	1.45408	PTBP1	polypyrimidine tract binding protein 1
1557908_at	0.2963	0.0104863	2.85229	-2.61787	1.39759	HP11014	uncharacterized HP11014
210656_at	0.2963	0.0104884	-2.85219	-2.61804	-1.15583	EED	embryonic ectoderm development
225742_at	0.2964	0.0105	-2.85168	-2.61895	-1.21999	MDM4	MDM4, p53 regulator
242007_at	0.2964	0.0105017	2.85161	-2.61909	1.14421	FBXO30	F-box protein 30
1555212_at	0.2964	0.0105114	2.85118	-2.61986	1.73406	OR8B8	olfactory receptor family 8 subfamily B member 8
226084_at	0.2964	0.0105136	2.85109	-2.62003	1.14056	MAP1B	microtubule associated protein 1B
1561728_a_at	0.2966	0.0105286	2.85042	-2.62121	2.01272	LINC00642	long intergenic non-protein coding RNA 642
1553818_x_at	0.2966	0.0105439	2.84975	-2.62241	1.63265	LOC102725315///LOC727983///POM121L10P///POM121L4P///POM121L8P///POM121L9P///POM121L1P	putative POM121-like protein 1-like///putative POM121-like protein 1-like///POM121 transmembrane nucleoporin like 10, pseudogene///POM121 transmembrane nucleoporin like 4, pseudogene///POM121 transmembrane nucleoporin like 8, pseudogene///POM121 transmembrane nucleoporin like 9, pseudogene///POM121 transmembrane nucleoporin like 1, pseudogene
1569947_at	0.2966	0.0105458	2.84967	-2.62256	2.01058
228073_at	0.2966	0.0105595	-2.84907	-2.62364	-0.730952	NANP	N-acetylneuraminic acid phosphatase
54970_at	0.2966	0.0105647	-2.84884	-2.62405	-0.827991	ZMIZ2	zinc finger MIZ-type containing 2
235103_at	0.2966	0.0105667	-2.84875	-2.6242	-0.816979	MAN2A1	mannosidase alpha class 2A member 1
206642_at	0.2966	0.0105667	2.84875	-2.62421	2.51473	DSG1	desmoglein 1
242615_at	0.2966	0.0105685	2.84867	-2.62434	1.17412	CFAP100	cilia and flagella associated protein 100
1555547_at	0.2966	0.0105713	2.84855	-2.62457	2.42404
1566571_at	0.2966	0.0105786	2.84823	-2.62514	1.25415
238110_at	0.2966	0.0105909	2.84769	-2.6261	1.5483	PPP6R2	protein phosphatase 6 regulatory subunit 2
243335_at	0.2966	0.010594	2.84756	-2.62634	1.58939	P4HA1	prolyl 4-hydroxylase subunit alpha 1
236129_at	0.2966	0.0105975	-2.84741	-2.62661	-1.3437	GALNT5	polypeptide N-acetylgalactosaminyltransferase 5
232450_at	0.2966	0.0105991	2.84733	-2.62674	1.87391	LOC149351	uncharacterized LOC149351
238381_x_at	0.2966	0.0106027	2.84718	-2.62702	1.86062
232276_at	0.2966	0.0106104	2.84684	-2.62762	1.43854	HS6ST3	heparan sulfate 6-O-sulfotransferase 3
215969_at	0.2966	0.0106273	2.8461	-2.62894	1.89308
1561754_at	0.2966	0.0106302	2.84598	-2.62917	2.0376
1570534_a_at	0.2966	0.0106374	2.84566	-2.62973	1.56759	ZNF483	zinc finger protein 483
1555314_at	0.2966	0.0106374	2.84566	-2.62973	2.01588	WDR19	WD repeat domain 19
31874_at	0.2966	0.0106535	-2.84496	-2.63099	-1.01646	GAS2L1	growth arrest specific 2 like 1
[truncated: 52,668 more rows]

## Sheet: hubgene expression
	CD1E	LEP	RNF144A	PKNOX2	TP53I11	GPX3
Control1	4.73659	8.5529	3.28648	4.78789	4.61668	10.3
Control2	5.07625	8.08111	3.50048	4.78789	4.64454	9.65659
Control3	4.85276	8.86119	3.38423	4.54354	4.40867	10.6131
Control4	5.0633	8.5529	3.26345	4.77975	4.69843	11.8248
Control5	4.78412	8.42184	3.29621	4.84453	4.60438	11.5912
Control6	5.15762	6.06288	3.29621	5.43276	4.90128	10.4805
Control7	4.8321	9.20011	3.24115	4.78789	4.65626	11.0993
OA1	5.50571	8.83635	3.48082	4.90749	4.77539	11.5504
OA2	5.11548	4.80083	3.55696	5.0016	4.97139	11.5283
OA3	4.88332	9.47302	3.47009	4.46479	4.58936	12.8091
OA4	4.90063	5.13932	3.41905	4.71159	4.60005	12.9442
OA5	4.9698	5.31648	3.4285	4.7736	4.4007	13.2385
OA6	5.18577	5.28387	3.4859	5.25512	5.11826	10.7077
OA7	5.14019	5.87413	3.55719	5.11851	4.84794	11.4888
OA8	5.26608	6.21296	3.51624	4.94885	4.58724	11.1749
OA9	5.70697	4.29902	3.67296	5.453	5.34459	9.81522
OA10	5.04561	4.28658	3.35409	4.52849	4.56531	11.4164
